# Supplementary material for: Stereoselective total synthesis of (3Z)- and (3E)-elatenynes
Source: Royal Society of Chemistry journal article supplement (doi:10.1039/d3ra07741a), 2023-01-01

–**Electronic Supplementary Information (ESI)**–

**Stereoselective total synthesis of (3*Z*)- and (3*E*)-elatenynes**

Soo Yeon Kwak,<sup>a,‡</sup> Iljin Shin,<sup>a,‡</sup> Hongjun Jang,<sup>a</sup> Youngjik Park,<sup>a</sup> Seongju Lim,<sup>a</sup> Dongjoo Lee,<sup>a</sup> Hyongsu Kim,<sup>\*a</sup> and Deukjoon Kim<sup>b</sup>

<sup>a</sup>College of Pharmacy and Research Institute of Pharmaceutical Science and Technology (RIPST),  
Ajou University, Suwon 16499, Korea

<sup>b</sup>The Research Institute of Pharmaceutical Sciences, College of Pharmacy, Seoul National University,  
Seoul 08826, Korea

<sup>‡</sup>These authors contributed equally to this work.

\* E-mail: [hkimajou@ajou.ac.kr](mailto:hkimajou@ajou.ac.kr)

**Table of Contents**

**ESI (Part A): Experimental Procedures and compounds**

**Characterizations.....S1 ~ S29**

**ESI (Part B): Copies of NMR Spectra..... S30 ~ S113**

**ESI (Part C): Copies of HRMS Spectra.....S114 ~ S140**

# – Electronic Supplementary Information –

## Part A (S1 ~ S29)

### Experimental Procedures and Product Characterizations

|                                                                                            |           |
|--------------------------------------------------------------------------------------------|-----------|
| General & Note.....                                                                        | S3        |
| Construction of Key 7-Hydroxy-6, 7- <i>threo</i> -6,9- <i>cis</i> -THF 10.....             | S4 ~ S10  |
| Construction of Key C(15)-C(4) Adjacent Bis-THF 21.....                                    | S11 ~ S18 |
| Construction of 7,12-Dibromo Adjacent bis-THF 6.....                                       | S18 ~ S24 |
| Completion of Total Synthesis of (3 <i>Z</i> )- and (3 <i>E</i> )-Elatenyne 1a and 1b..... | S24 ~ S28 |
| References.....                                                                            | S29       |

## General & Note: S3

### General

Proton ( $^1\text{H}$ ) and carbon ( $^{13}\text{C}$ ) NMR spectra were obtained on Varian Mercury 400 and ECZ600R. Chemical shifts are reported in ppm units with  $\text{Me}_4\text{Si}$  or  $\text{CHCl}_3$  as the internal standard. Structural assignments were made with additional information from gCOSY, gHSQC, gHMQC, and gHMBC experiments. Specific rotation was obtained on a Jasco P-2000 (light source, WI 589 nm). High resolution mass spectra (HRMS) were recorded using electronionization (EI) and fast atom bombardment (FAB). All reactions were routinely carried out under an inert atmosphere of dry nitrogen. All reactions that required heating were carried out using oil bath. Reactions were checked by thin layer chromatography (Kieselgel 60 F254, Merck). Spots were detected by viewing under a UV light, and by colorizing with charring after dipping in *p*-anisaldehyde solution in a mixture of acetic acid, sulfuric acid, and methanol. In aqueous work-up, all organic solutions were dried over anhydrous sodium sulfate and filtered prior to rotary evaporation. The crude compounds were purified by column chromatography on a silica gel (Kieselgel 60, 70-230 mesh, Merck and Kieselgel 60, 63-200 mesh, Merck). Unless otherwise noted, materials and all solvents were obtained from commercial suppliers and were used without purification. Toluene and methylene chloride were dried with 4Å molecular sieve.

**Note:** The present Supporting Information A includes modified versions of the experimental procedures that have been already described in the literature in case the experimental procedures were improved in terms of reaction conditions, yields, selectivity, and so on, or where additional spectroscopic data are available.

## Construction of Key 7-Hydroxy-6, 7-*threo*-6,9-*cis*-THF 10: S4 ~ S10

### Scheme ESI-01. Stereoselective Synthesis of Key 6,7-*cis*-6,9-*cis*-THF 10 via IAEA

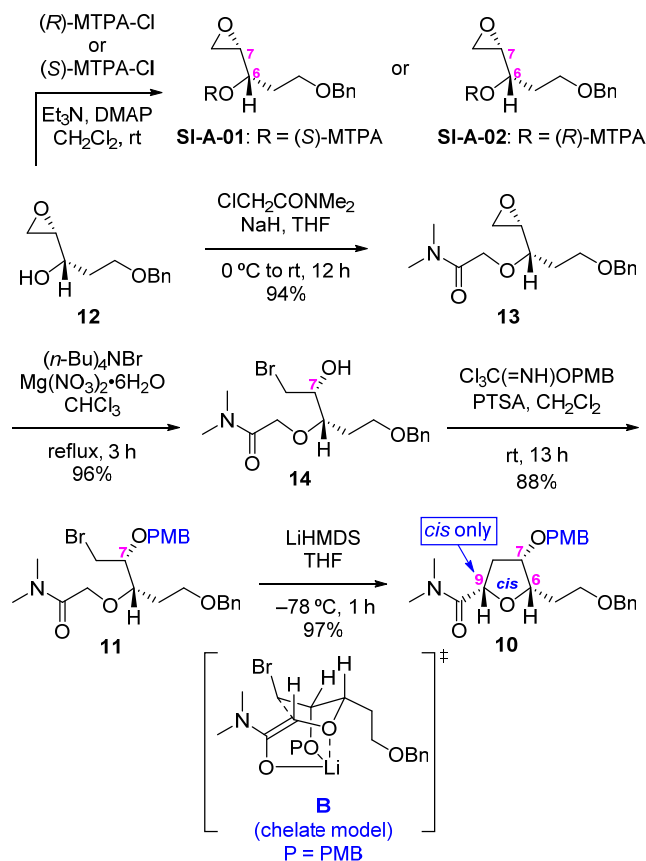

Scheme 2b. Preparation of 6,7-*cis*-6,9-*trans*-THF 17 for comparison

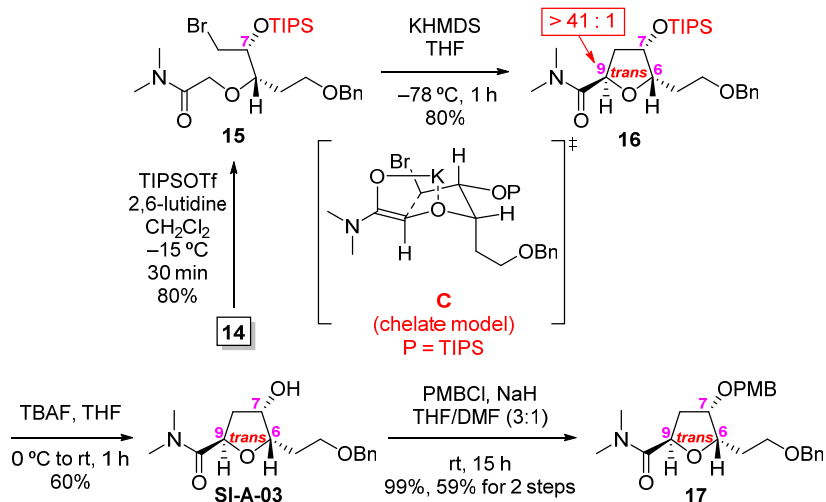

## Determination of *ee* Value and Confirmation of C(6) Absolute Stereochemistry of Secondary Alcohol **12**<sup>1</sup>

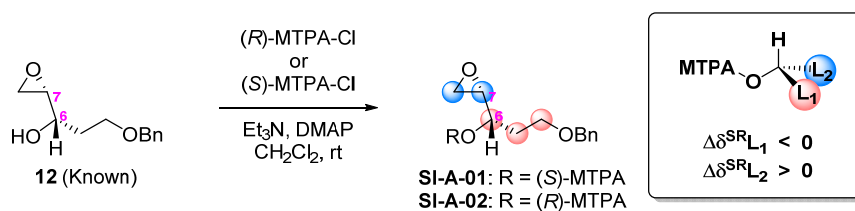

To a solution of secondary epoxy alcohol **12** in  $\text{CH}_2\text{Cl}_2$  were successively added (*R*)- or (*S*)- $\alpha$ -methoxy- $\alpha$ -trifluoromethylphenylacetyl chloride (5.0 eq),  $\text{Et}_3\text{N}$  (6.0 eq), and DMAP (0.4 eq) at room temperature. After stirring for 1 h at the same temperature, the reaction mixture was quenched with saturated aqueous  $\text{NaHCO}_3$ , diluted with  $\text{Et}_2\text{O}$ . The layers were separated, and the aqueous layer was extracted with  $\text{Et}_2\text{O}$ . The combine layers were washed with brine, dried over anhydrous  $\text{Na}_2\text{SO}_4$ , filtered, and concentrated *in vacuo*. The residue was purified by column chromatography (silica gel, hexanes/(ethyl acetate, 6 : 1) to afford the crude (*S*)-MTPA ester **SI-A-01** or (*R*)-MTPA ester **SI-A-02** as a colorless oil: [**For (*S*)-Mosher Derivative SI-A-01**]  $^1\text{H NMR}$  (600 MHz,  $\text{CDCl}_3$ )  $\delta$  7.56–7.55 (m, 2 H), 7.42–7.37 (m, 3 H), 7.36–7.33 (m, 2 H), 7.32–7.28 (m, 3 H), 5.06 (q,  $J = 6.8$  Hz, 1 H), 4.42 (AB,  $J_{\text{AB}} = 11.8$  Hz,  $\Delta\nu_{\text{AB}} = 24.4$  Hz, 2 H), 3.59 (s, 3 H), 3.46 (dt,  $J = 9.4, 5.7$  Hz, 1 H), 3.38 (dt,  $J = 9.6, 6.4$  Hz, 1 H), 3.17 (ddd,  $J = 7.0, 4.1, 2.5$  Hz, 1 H), 2.85 (dd,  $J = 4.8, 4.1$  Hz, 1 H), 2.68 (dd,  $J = 4.9, 2.6$  Hz, 1 H), 1.99 (q,  $J = 6.3$  Hz, 2 H) [**For (*R*)-Mosher Derivative SI-A-02**]  $^1\text{H NMR}$  (600 MHz,  $\text{CDCl}_3$ )  $\delta$  7.56–7.55 (m, 2 H), 7.42–7.37 (m, 3 H), 7.36–7.34 (m, 2 H), 7.32–7.28 (m, 3 H), 5.13 (q,  $J = 6.6$  Hz, 1 H), 4.48 (AB,  $J_{\text{AB}} = 11.8$  Hz,  $\Delta\nu_{\text{AB}} = 15.3$  Hz, 2 H), 3.59–3.55 (m, 1 H), 3.52–3.49 (m, 1 H), 3.51 (s, 3 H), 3.12 (ddd,  $J = 6.6, 4.1, 2.6$  Hz, 1 H), 2.76 (t,  $J = 4.5$  Hz, 1 H), 2.58 (dd,  $J = 4.9, 2.6$  Hz, 1 H), 2.06 (q,  $J = 6.1$  Hz, 2 H).

## Preparation of Epoxy Amide **13**

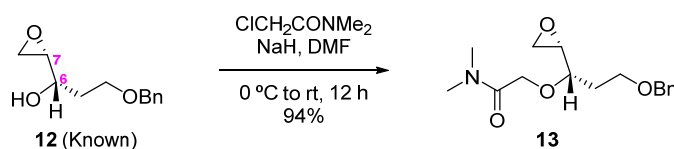

To a cooled ( $0\text{ }^\circ\text{C}$ ) solution of known epoxy alcohol **12** (6.04 g, 28.99 mmol) in DMF (290 mL, 0.1 M) was added 2-chloro-*N,N*-dimethylacetamide (3.58 mL, 34.79 mmol) and sodium hydride (2.32 g, 60% dispersion in mineral oil, 57.98 mmol). After being stirred for 12 h at

room temperature, the reaction mixture was quenched with saturated aqueous  $\text{NH}_4\text{Cl}$  and diluted with  $\text{EtOAc}$ . The layers were separated, and the aqueous layer was extracted with  $\text{Et}_2\text{O}$ . The combined organic layers were washed with saturated brine, dried over anhydrous  $\text{Na}_2\text{SO}_4$ , filtered, and concentrated *in vacuo*. The residue was purified by column chromatography (silica gel, hexanes/ethyl acetate, 1 : 2) to afford the epoxy amide **13** (10.12 g, 94%) as a colorless oil:  $[\alpha]^{24}_{\text{D}} = +0.027$  (*c* 0.95,  $\text{CHCl}_3$ );  $^1\text{H NMR}$  (600 MHz,  $\text{CDCl}_3$ )  $\delta$  7.35–7.26 (m, 5 H), 4.52–4.47 (m, 2 H), 4.33 (AB,  $J_{\text{AB}} = 13.9$  Hz,  $\Delta\nu_{\text{AB}} = 94.69$  Hz, 2 H), 3.69–3.62 (m, 2 H), 3.23 (td,  $J = 7.8, 4.9$  Hz, 1 H), 3.05 (ddd,  $J = 7.3, 4.2, 2.7$  Hz, 1 H), 2.96 (s, 3 H), 2.95 (s, 3 H), 2.74–2.73 (m, 1 H), 2.46 (dd,  $J = 4.8, 2.7$  Hz, 1 H), 2.00 (ddt,  $J = 13.9, 8.1, 5.7$  Hz, 1 H), 1.92–1.86 (m, 1 H);  $^{13}\text{C NMR}$  (100 MHz,  $\text{CDCl}_3$ )  $\delta$  168.7, 137.9, 128.0, 127.3, 127.2, 79.0, 72.7, 68.2, 66.0, 54.4, 42.9, 36.0, 35.2, 32.4; HRMS (EI-magnetic sector)  $m/z$ :  $[\text{M}]^+$  Calcd for  $\text{C}_{16}\text{H}_{23}\text{NO}_4$  293.1627; Found 293.1624.

#### Preparation of Bromohydrin Amide **14**

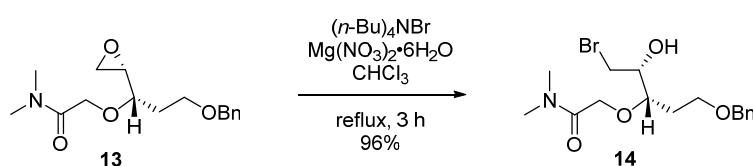

To a solution of epoxy amide **13** (8.50 g, 28.97 mmol) in  $\text{CHCl}_3$  (116 mL, 0.25 M) was added tetrabutylammonium bromide (14.01 g, 43.46 mmol) and magnesium nitrate hexahydrate (5.20 g, 20.28 mmol) in portions. After being stirred for 3 h at 80 °C, the reaction mixture was quenched with saturated aqueous  $\text{H}_2\text{O}$  and diluted with  $\text{Et}_2\text{O}$ . The combined organic layers were washed with saturated brine, dried over anhydrous  $\text{Na}_2\text{SO}_4$ , filtered, and concentrated *in vacuo*. The residue was purified by column chromatography (silica gel, hexanes/ethyl acetate, 1 : 5) to afford the bromohydrin amide **14** (10.42 g, 96%) as a colorless oil:  $[\alpha]^{23}_{\text{D}} = -0.60$  (*c* 0.95,  $\text{CHCl}_3$ );  $^1\text{H NMR}$  (600 MHz,  $\text{CDCl}_3$ )  $\delta$  7.36–7.32 (m, 4 H), 7.30–7.27 (m, 1 H), 6.15 (d,  $J = 1.4$  Hz, 1 H), 4.52 (AB,  $J_{\text{AB}} = 11.8$  Hz,  $\Delta\nu_{\text{AB}} = 59.35$  Hz, 2 H), 4.26 (AB,  $J_{\text{AB}} = 15.7$  Hz,  $\Delta\nu_{\text{AB}} = 121.75$  Hz, 2 H), 3.81 (tt,  $J = 6.7, 3.2$  Hz, 1 H), 3.68 (ddd,  $J = 9.7, 8.4, 4.5$  Hz, 1 H), 3.65–3.61 (m, 3 H), 3.45 (ddd,  $J = 10.9, 4.1, 1.0$  Hz, 1 H), 2.94 (s, 3 H), 2.77 (s, 3 H), 2.00–1.95 (m, 1 H), 1.74–1.68 (m, 1 H);  $^{13}\text{C NMR}$  (150 MHz,  $\text{CDCl}_3$ )  $\delta$  170.8, 138.1, 128.4, 127.7, 82.6, 72.9, 72.6, 68.6, 65.8, 35.73, 35.70, 31.2; HRMS (EI-magnetic sector)  $m/z$ :  $[\text{M}]^+$  Calcd for  $\text{C}_{16}\text{H}_{24}\text{BrNO}_4$  373.0889; Found 373.0884.

## Preparation of PMB-Protected Bromo Amide **11**

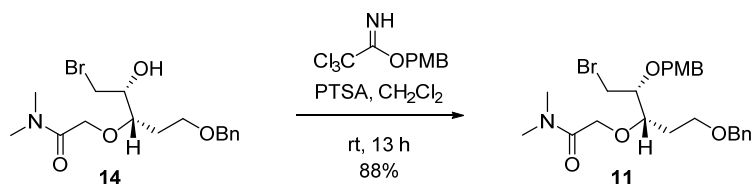

To a solution of bromohydrin amide **14** (10.45 g, 27.92 mmol) in CH<sub>2</sub>Cl<sub>2</sub> (280 mL, 0.1 M) was added *p*-methoxybenzyl-2,2,2-trichloroacetimidate (29.00 g, 139.61 mmol) and PTSA (1.06 g, 5.58 mmol) in portions at the room temperature. The resulting mixture was stirred for 13 h at the same temperature, the reaction mixture was quenched with saturated aqueous NaHCO<sub>3</sub> and diluted with CH<sub>2</sub>Cl<sub>2</sub>. The combined organic layers were washed with saturated brine, dried over anhydrous Na<sub>2</sub>SO<sub>4</sub>, filtered, and concentrated *in vacuo*. The residue was purified by column chromatography (silica gel, ether/ethyl acetate, 2 : 1) to afford the PMB-protected bromo amide **11** (12.14 g, 88%) as a colorless oil:  $[\alpha]_D^{24} = +0.47$  (*c* 0.99, CHCl<sub>3</sub>); <sup>1</sup>H NMR (400 MHz, CDCl<sub>3</sub>) δ 7.35–7.28 (m, 4 H), 7.27–7.25 (m, 3 H), 6.85–6.82 (m, 2 H), 4.58 (AB, *J*<sub>AB</sub> = 11.2 Hz, Δ*v*<sub>AB</sub> = 46.87 Hz, 2 H), 4.46 (s, 2 H), 4.20 (d, *J* = 5.0 Hz, 2 H), 3.82–3.75 (m, 2 H), 3.78 (s, 3 H), 3.66 (dd, *J* = 10.6, 4.3 Hz, 1 H), 3.59–3.48 (m, 2 H), 3.42 (dd, *J* = 10.6, 6.0 Hz, 1 H), 2.90 (s, 3 H), 2.86 (s, 3 H), 1.99–1.91 (m, 1 H), 1.82–1.74 (m, 1 H); <sup>13</sup>C NMR (100 MHz, CDCl<sub>3</sub>) δ 168.6, 158.9, 130.0, 129.6, 129.5, 128.0, 127.3, 127.2, 113.4, 79.6, 77.6, 72.7, 72.5, 69.5, 66.3, 55.1, 36.1, 35.3, 32.0, 29.9; HRMS (EI-magnetic sector) *m/z*: [M]<sup>+</sup> Calcd for C<sub>24</sub>H<sub>32</sub>BrNO<sub>5</sub> 493.1464; Found 493.1462.

## Preparation of 7-OPMB-6,7-*cis*-6,9-*cis*-THF **10**

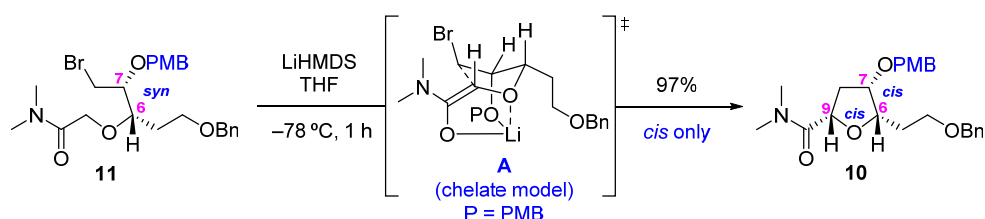

To a cooled (–78 °C) solution of 7-OPMB-6,7-*syn*- $\omega$ -bromo amide **11** (1.57 g, 3.18 mmol) in THF (635 mL, 0.005 M) was dropwise added LiHMDS (9.53 mL, 1.0 M solution in THF, 9.53 mmol). After being stirred for 1 h at the same temperature, the reaction mixture was quenched with saturated aqueous NH<sub>4</sub>Cl and diluted with EtOAc. The layers were separated, and the aqueous layer was extracted with EtOAc. The combined organic layers were washed with

saturated brine, dried over anhydrous Na<sub>2</sub>SO<sub>4</sub>, filtered, and concentrated *in vacuo*. The residue was purified by column chromatography (silica gel, ether/ethyl acetate, 4 : 1) to afford 7-OPMB-6,7-*cis*-6,9-*cis*-THF **10** (1.27 g, 97%, *cis* only, see page S39 & S57) as a colorless oil:  $[\alpha]_D^{24} = -0.19$  (*c* 0.97, CHCl<sub>3</sub>); <sup>1</sup>H NMR (600 MHz, CDCl<sub>3</sub>) δ 7.34–7.30 (m, 4 H), 7.28–7.26 (m, 1 H), 7.23–7.21 (m, 2 H), 6.86–6.83 (m, 2 H), 4.51–4.47 (m, 3 H), 4.43 (AB, *J*<sub>AB</sub> = 11.6 Hz, Δ*v*<sub>AB</sub> = 162.9 Hz, 2 H), 3.97–3.94 (m, 2 H), 3.79 (s, 3 H), 3.62–3.55 (m, 2 H), 3.09 (s, 3 H), 2.94 (s, 3 H), 2.70 (ddd, *J* = 13.5, 6.6, 2.7 Hz, 1 H), 2.23–2.17 (m, 1 H), 2.07–1.97 (m, 2 H); <sup>13</sup>C NMR (100 MHz, CDCl<sub>3</sub>) δ 169.5, 158.8, 138.3, 130.1, 129.1, 128.1, 127.4, 127.3, 113.5, 80.1, 77.5, 75.8, 72.8, 70.1, 67.3, 55.2, 37.1, 36.1, 33.8, 29.2; HRMS (EI-magnetic sector) *m/z*: [M]<sup>+</sup> Calcd for C<sub>24</sub>H<sub>31</sub>NO<sub>5</sub> 413.2202; Found 413.2205.

### Preparation of TIPS-Protected Bromo Amide **15**

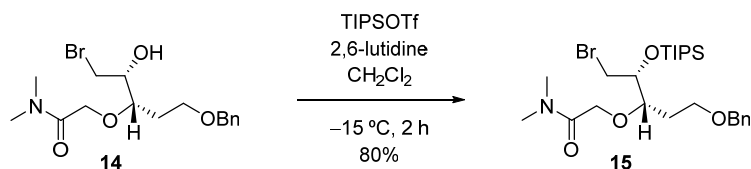

To a cooled (−15 °C) solution of bromohydrin amide **14** (1.42 g, 3.80 mmol) in CH<sub>2</sub>Cl<sub>2</sub> (38 mL, 0.1 M) was added 2,6-lutidine (2.65 mL, 22.77 mmol) and triisopropylsilyl trifluoromethanesulfonate (TIPSOTf, 2.02 mL, 11.40 mmol). The resulting mixture was stirred for 2 h at the same temperature, the reaction mixture was quenched with saturated aqueous NaHCO<sub>3</sub> and diluted with EtOAc. The combined organic layers were washed with saturated brine, dried over anhydrous Na<sub>2</sub>SO<sub>4</sub>, filtered, and concentrated *in vacuo*. The residue was purified by column chromatography (silica gel, ether/ethyl acetate, 3 : 1) to afford the TIPS-protected bromo amide **15** (1.60 g, 80%) as a colorless oil:  $[\alpha]_D^{24} = -18.2$  (*c* 0.88, CHCl<sub>3</sub>); <sup>1</sup>H NMR (600 MHz, CDCl<sub>3</sub>) δ 7.34–7.31 (m, 4 H), 7.29–7.25 (m, 1 H), 4.52–4.48 (m, 2 H), 4.23 (dt, *J* = 7.4, 4.2 Hz, 1 H), 4.22–4.17 (m, 2 H), 3.73 (ddd, *J* = 9.3, 4.3, 3.1 Hz, 1 H), 3.68 (dd, *J* = 10.4, 4.0 Hz, 1 H), 3.62 (dd, *J* = 7.4, 5.4 Hz, 2 H), 3.35 (dd, *J* = 10.4, 6.4 Hz, 1 H), 2.94 (s, 3 H), 2.91 (s, 3 H), 2.07 (dtd, *J* = 14.5, 7.4, 3.1 Hz, 1 H), 1.73 (ddt, *J* = 14.7, 9.4, 5.4 Hz, 1 H), 1.13–1.05 (m, 21 H); <sup>13</sup>C NMR (150 MHz, CDCl<sub>3</sub>) δ 169.0, 138.5, 128.3, 127.6, 127.5, 79.8, 73.5, 72.9, 70.2, 66.9, 36.4, 35.4, 34.6, 29.3, 18.1, 12.7; HRMS (EI-magnetic sector) *m/z*: [M]<sup>+</sup> Calcd for C<sub>25</sub>H<sub>44</sub>BrNO<sub>4</sub>Si 529.2223; Found 529.2225.



## Preparation of 7-OTIPS-6,7-*cis*-6,9-*trans*-THF **16**

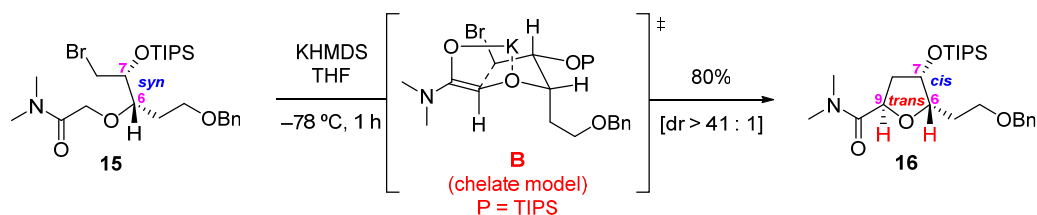

To a cooled ( $-78\text{ }^{\circ}\text{C}$ ) solution of TIPS-protected bromo amide **15** (52.4 mg, 0.0988 mmol) in THF (20 mL, 0.005 M) was dropwise added KHMDS (0.42 mL, 0.7 M solution in toluene, 0.30 mmol). After being stirred for 1 h at the same temperature, the reaction mixture was quenched with saturated aqueous  $\text{NH}_4\text{Cl}$  and diluted with EtOAc. The layers were separated, and the aqueous layer was extracted with EtOAc. The combined organic layers were washed with saturated brine, dried over anhydrous  $\text{Na}_2\text{SO}_4$ , filtered, and concentrated *in vacuo*. The residue was purified by column chromatography (silica gel, ether/ethyl acetate, 1 : 2) to afford 7-OTIPS-6,7-*cis*-6,9-*trans*-THF **16** (35.6 mg, 80%, *trans:cis* > 41 : 1, see page S48) as a colorless oil:  $[\alpha]_D^{23} = -12.8$  ( $c$  0.89,  $\text{CHCl}_3$ );  $^1\text{H NMR}$  (600 MHz,  $\text{CDCl}_3$ )  $\delta$  7.33–7.32 (m, 4 H), 7.28–7.26 (m, 1 H), 4.81 (t,  $J = 7.4$  Hz, 1 H), 4.51 (s, 2 H), 4.50–4.48 (m, 1 H), 4.08 (ddd,  $J = 7.8, 5.4, 3.9$  Hz, 1 H), 3.65–3.58 (m, 2 H), 3.08 (s, 3 H), 2.95 (s, 3 H), 2.56 (ddd,  $J = 13.0, 7.7, 5.2$  Hz, 1 H), 2.05 (ddd,  $J = 13.1, 7.1, 2.6$  Hz, 1 H), 1.96–1.91 (m, 2 H), 1.08–1.04 (m, 21 H);  $^{13}\text{C NMR}$  (150 MHz,  $\text{CDCl}_3$ )  $\delta$  171.2, 138.6, 128.3, 127.6, 127.4, 80.5, 74.1, 73.7, 73.0, 67.9, 38.5, 37.0, 35.8, 29.9, 18.09, 18.05, 12.4; HRMS (EI-magnetic sector)  $m/z$ :  $[\text{M}]^+$  Calcd for  $\text{C}_{25}\text{H}_{43}\text{NO}_4\text{Si}$  449.2961; Found 449.2961.

## Preparation of Alcohol SI-A-03

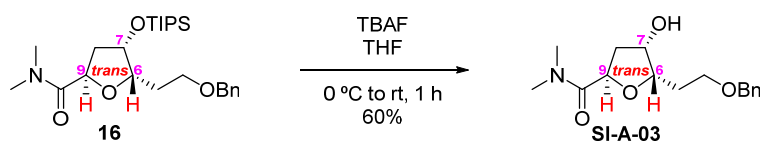

To a cooled ( $0\text{ }^{\circ}\text{C}$ ) solution of 7-OTIPS-6,7-*threo*-6,9-*trans*-THF **16** (0.36 g, 0.79 mmol) in anhydrous THF (8 mL, 0.1 M) was added tetrabutylammonium fluoride (TBAF, 0.79 mL, 0.79 mmol). After being stirred for 1 h at the room temperature, the reaction mixture was quenched with saturated aqueous  $\text{NaHCO}_3$  and diluted with Et<sub>2</sub>O. The layers were separated, and the aqueous layer was extracted with Et<sub>2</sub>O. The combined organic layers were washed with saturated brine, dried over anhydrous  $\text{Na}_2\text{SO}_4$ , filtered, and concentrated *in vacuo*. The residue

was purified by column chromatography (silica gel, ethyl acetate only) to afford alcohol **SI-A-03** (0.14 g, 60%) as a colorless oil:  $[\alpha]^{23}_D = -21.4$  ( $c$  0.31,  $\text{CHCl}_3$ );  $^1\text{H NMR}$  (600 MHz,  $\text{CDCl}_3$ )  $\delta$  7.37–7.34 (m, 2 H), 7.32–7.29 (m, 3 H), 4.92 (dd,  $J = 8.4, 7.1$  Hz, 1 H), 4.53 (AB,  $J_{AB} = 11.7$  Hz,  $\Delta\nu_{AB} = 13.4$  Hz, 2 H), 4.35 (dt,  $J = 5.4, 2.7$  Hz, 1 H), 4.04 (ddd,  $J = 9.8, 5.1, 3.0$  Hz, 1 H), 3.67 (ddd,  $J = 9.5, 4.7, 3.4$  Hz, 1 H), 3.49 (ddd,  $J = 10.6, 9.4, 2.5$  Hz, 1 H), 3.25 (t,  $J = 2.1$  Hz, 1 H), 3.08 (s, 3 H), 2.95 (s, 3 H), 2.50 (dddd,  $J = 13.7, 8.4, 5.1, 1.6$  Hz, 1 H), 2.19–2.15 (m, 1 H), 2.12–2.06 (m, 1 H), 2.05–2.00 (m, 1 H);  $^{13}\text{C NMR}$  (150 MHz,  $\text{CDCl}_3$ )  $\delta$  171.6, 137.3, 128.6, 128.0, 127.8, 83.5, 73.8, 73.7, 72.6, 66.9, 37.2, 36.9, 35.8, 29.3; HRMS (EI-magnetic sector)  $m/z$ :  $[\text{M}]^+$  Calcd for  $\text{C}_{16}\text{H}_{23}\text{NO}_4$  293.1627; Found 293.1624.

### Preparation of 7-OPMB-6,7-*cis*-6,9-*trans*-THF **17**

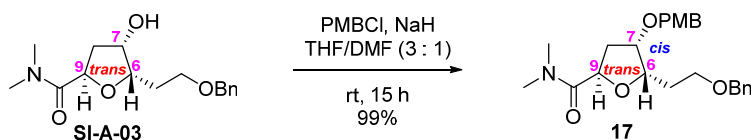

To a solution of alcohol **SI-A-03** (0.13 g, 0.45 mmol) in THF/DMF (3 : 1, 4.4 mL, 0.3 M) was added *p*-methoxybenzyl chloride (0.26 mL, 1.80 mmol) and sodium hydride (63 mg, 60% dispersion of mineral oil, 1.575 mmol) in portions at the room temperature. The resulting mixture was stirred for 15 h at the same temperature, the reaction mixture was quenched with saturated aqueous  $\text{NaHCO}_3$  and diluted with  $\text{CH}_2\text{Cl}_2$ . The combined organic layers were washed with saturated brine, dried over anhydrous  $\text{Na}_2\text{SO}_4$ , filtered, and concentrated *in vacuo*. The residue was purified by column chromatography (silica gel, hexanes/ethyl acetate, 3 : 1) to afford the 7-OPMB-6,7-*cis*-6,9-*trans*-THF **17** (0.184 g, 99%) as a colorless oil:  $[\alpha]^{23}_D = -13.6$  ( $c$  0.90,  $\text{CHCl}_3$ );  $^1\text{H NMR}$  (600 MHz,  $\text{CDCl}_3$ )  $\delta$  7.34–7.30 (m, 4 H), 7.28–7.26 (m, 1 H), 7.24–7.21 (m, 2 H), 6.87–6.85 (m, 2 H), 4.82 (t,  $J = 7.6$  Hz, 1 H), 4.48 (AB,  $J_{AB} = 12.0$  Hz,  $\Delta\nu_{AB} = 11.2$  Hz, 2 H), 4.44 (AB,  $J_{AB} = 11.6$  Hz,  $\Delta\nu_{AB} = 104.7$  Hz, 2 H), 4.09 (ddd,  $J = 7.8, 5.7, 3.6$  Hz, 1 H), 4.03–4.02 (m, 1 H), 3.80 (s, 3 H), 3.56 (td,  $J = 6.7, 2.4$  Hz, 2 H), 3.08 (s, 3 H), 2.95 (s, 3 H), 2.49 (ddd,  $J = 13.1, 7.9, 5.0$  Hz, 1 H), 2.20 (ddd,  $J = 13.3, 7.3, 1.5$  Hz, 1 H), 2.06–1.98 (m, 2 H);  $^{13}\text{C NMR}$  (150 MHz,  $\text{CDCl}_3$ )  $\delta$  171.1, 159.2, 138.5, 130.2, 129.2, 128.3, 127.6, 127.5, 113.7, 80.0, 79.1, 74.1, 72.9, 71.0, 67.7, 55.2, 37.0, 35.8, 34.3, 29.4; HRMS (EI-magnetic sector)  $m/z$ :  $[\text{M}]^+$  Calcd for  $\text{C}_{24}\text{H}_{31}\text{NO}_5$  413.2202; Found 413.2202.

## Construction of 7,12-Dihydroxy Adjacent Bis-THF 21

### Scheme ESI-02. Construction of 7,12-Dihydroxy Adjacent Bis-THF 21

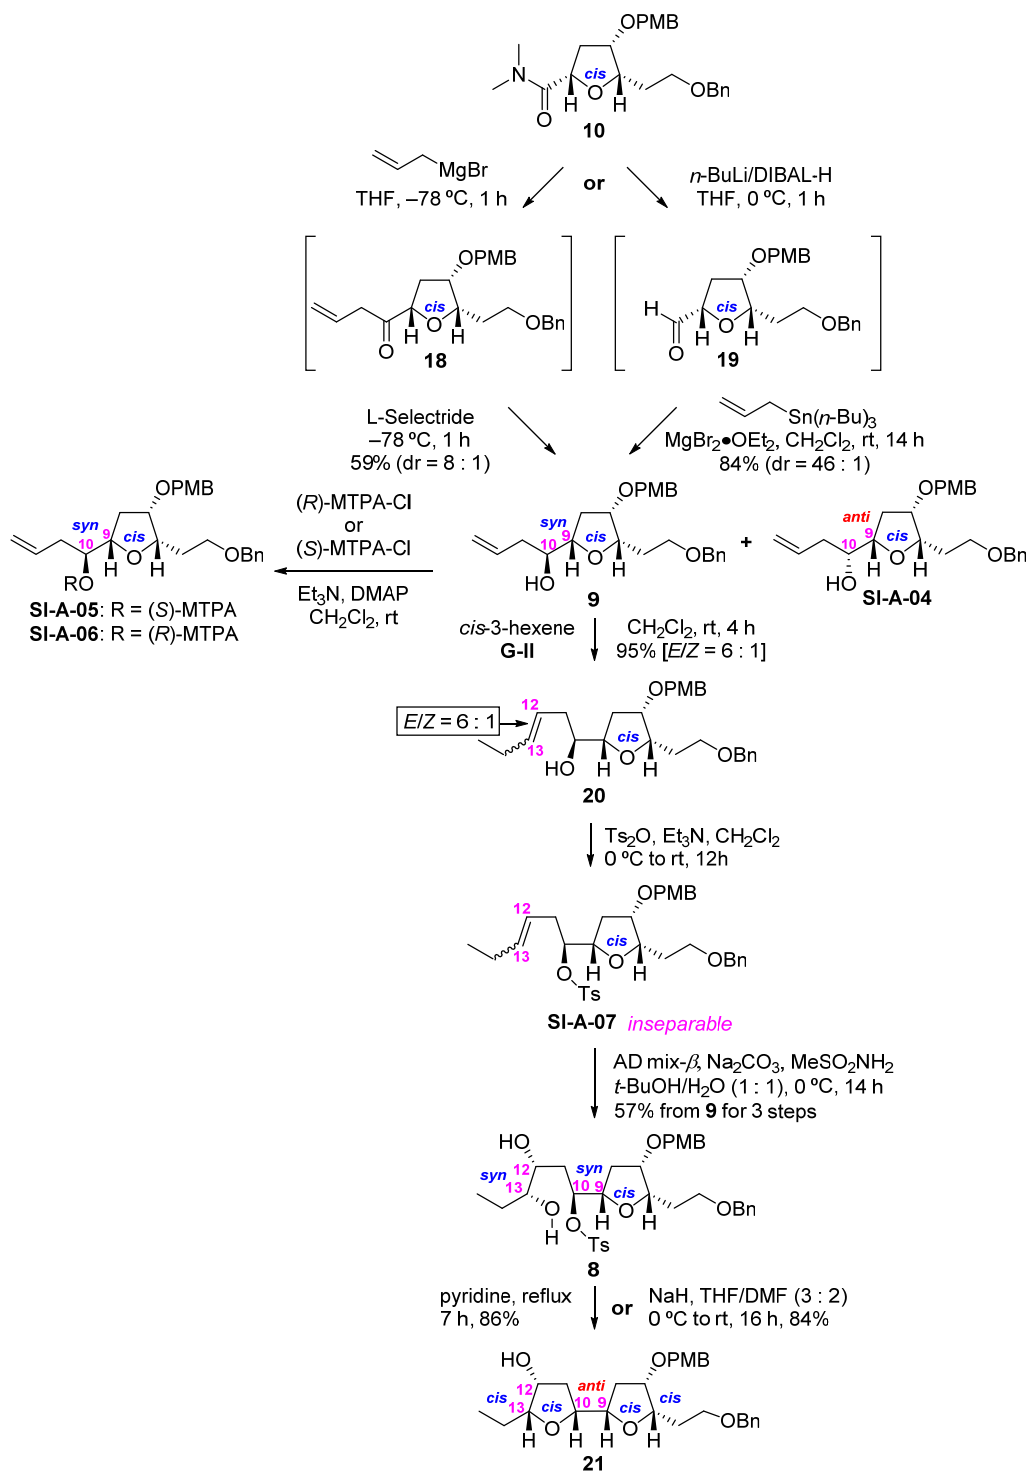

## Preparation of (10S)-Alcohol SI-A-04 by Direct Ketone Synthesis/L-Selectride Sequence

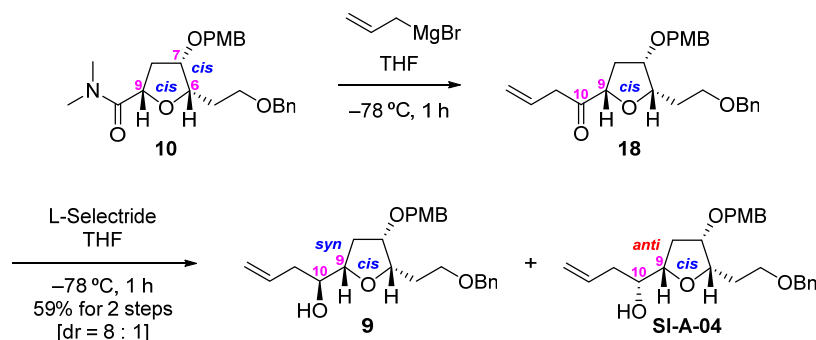

**[Direct Ketone Synthesis]**<sup>3</sup> To a cooled (-78 °C) solution of 7-OPMB-6,7-*cis*-6,9-*cis*-THF **10** (438.1 mg, 1.06 mmol) in anhydrous THF (20 mL, 0.1 M) was dropwise added allylmagnesium chloride (1.06 mL, 2.0 M solution in THF, 2.12 mmol). After being stirred at the same temperature for 1 h, the reaction mixture was quenched with saturated aqueous NH<sub>4</sub>Cl, and diluted with Et<sub>2</sub>O. The layers were separated, and the aqueous layer was extracted with Et<sub>2</sub>O. The combined organic layers were washed with saturated brine, dried over anhydrous Na<sub>2</sub>SO<sub>4</sub>, and concentrated *in vacuo* to afford the crude ketone **18** as a colorless oil. **[L-Selectride Reduction]** To a cooled (-78 °C) solution of the above crude ketone **18** in THF (20 mL) was added lithium *tri*-*sec*-butylborohydride (L-Selectride, 3.2 mL, 1.0 M in THF, 3.2 mmol). After being stirred for 1 h at the same temperature, the reaction mixture was quenched with MeOH, and H<sub>2</sub>O<sub>2</sub> (5.0 mL, 1.0 M in H<sub>2</sub>O, 5.0 mmol) and NaOH (5 mL, 2.0 M in H<sub>2</sub>O, 10.0 mmol) were added. The resulting mixture was vigorously stirred for 12 h at room temperature and diluted with Et<sub>2</sub>O. The layers were separated, and the aqueous layer was extracted with Et<sub>2</sub>O. The combined organic layers were washed with saturated brine, dried over anhydrous Na<sub>2</sub>SO<sub>4</sub>, filtered, and concentrated *in vacuo*. The residue was purified by column chromatography (silica gel, hexanes/ethyl acetate, 10 : 1) to afford (10*S*)-9,10-*syn* homoallylic alcohol **9** (259.6 mg, 59%, dr = 8 : 1, [see page S59](#)) as a colorless oil.

## Preparation of (10*S*)-9,10-*syn* Homoallylic Alcohol **9** by a Sequential Ate Complex/Keck Allylation

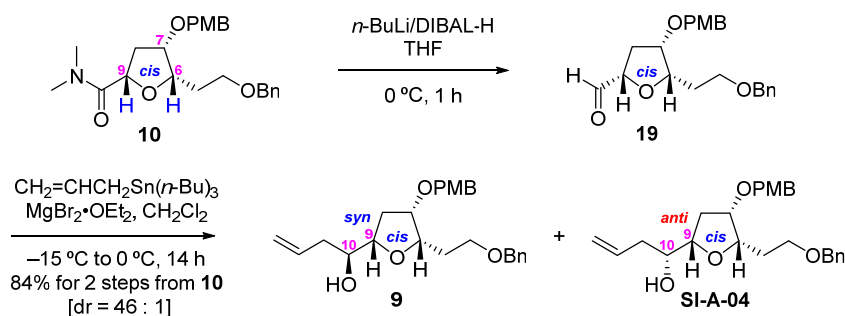

**[Ate Complex Reduction] Ate Complex Generation:** To a cooled ( $-78\text{ }^\circ\text{C}$ ) solution of  $n\text{-BuLi}$  (1.0 mL, 1.6 M in hexane) in THF (13.3 mL) was added DIBAL-H (1.7 mL, 1.0 M in toluene) and stirred for 30 min at the same temperature. To a cooled ( $0\text{ }^\circ\text{C}$ ) solution of 7-OPMB-6,7-*cis*-6,9-*cis*-THF **10** (96.7 mg, 0.23 mmol) in dry THF (23.4 mL, 0.01 M) were added dropwise ate complex solution (4.67 mL, 0.47 mmol). After being stirred at the same temperature for 1 h, the reaction mixture was quenched with MeOH and diluted with Et<sub>2</sub>O and saturated aqueous NH<sub>4</sub>Cl. The layers were separated, and the aqueous layer was extracted with Et<sub>2</sub>O. The combined organic layers were washed with saturated brine, dried over anhydrous Na<sub>2</sub>SO<sub>4</sub>, and concentrated *in vacuo* to afford the crude aldehyde **19**, which was immediately employed to the next step without further purification. **[Keck Allylation]**<sup>2</sup> To a cooled ( $-15\text{ }^\circ\text{C}$ ) solution of the above crude aldehyde **19** in dry CH<sub>2</sub>Cl<sub>2</sub> (4.7 mL, 0.05 M) was added MgBr<sub>2</sub>·OEt<sub>2</sub> (0.30 g, 1.17 mmol). The resulting mixture was stirred for 10 min, and then allyltributyltin (0.29 mL, 0.94 mmol) was added dropwise. After being stirred for 14 h at  $0\text{ }^\circ\text{C}$ , the reaction mixture was quenched with saturated aqueous NaHCO<sub>3</sub>, and diluted with CH<sub>2</sub>Cl<sub>2</sub>. The layers were separated, and the aqueous layer was extracted with CH<sub>2</sub>Cl<sub>2</sub>. The combined organic layers were washed with saturated brine, dried over anhydrous Na<sub>2</sub>SO<sub>4</sub>, and concentrated *in vacuo*. The residue was filtrated by column chromatography (silica gel, hexanes/ethyl acetate/dichloromethane, 4 : 1 : 1) to afford (10*S*)-9,10-*syn* homoallylic alcohol **9** (81.1 mg, 84%, dr = 46 : 1, [see page S61](#)) as colorless oils: **[For 9]**  $[\alpha]^{24}_{\text{D}} = -0.15$  ( $c$  0.93, CHCl<sub>3</sub>); <sup>1</sup>H NMR (600 MHz, CDCl<sub>3</sub>)  $\delta$  7.35–7.31 (m, 4 H), 7.29–7.27 (m, 1 H), 7.22–7.19 (m, 2 H), 6.86–6.84 (m, 2 H), 5.88 (ddt,  $J = 17.2, 10.2, 7.0$  Hz, 1 H), 5.13–5.05 (m, 2 H), 4.49 (AB,  $J_{\text{AB}} = 12.0$  Hz,  $\Delta\nu_{\text{AB}} = 15.73$  Hz, 2 H), 4.38 (AB,  $J_{\text{AB}} = 11.5$  Hz,  $\Delta\nu_{\text{AB}} = 148.63$  Hz, 2 H), 3.95–3.92 (m, 1 H), 3.93–3.90 (m, 2 H), 3.80 (s, 3 H), 3.61–3.54 (m, 3 H), 3.00 (d,  $J = 5.1$  Hz, 1 H),

2.29 (tq,  $J = 7.2, 1.4$  Hz, 2 H), 2.14 (ddd,  $J = 14.0, 8.8, 5.4$  Hz, 1 H), 2.06–1.95 (m, 3 H);  $^{13}\text{C}$  NMR (150 MHz,  $\text{CDCl}_3$ )  $\delta$  159.2, 138.5, 135.3, 129.8, 129.4, 128.3, 127.7, 127.5, 116.9, 113.8, 79.7, 79.4, 78.6, 73.2, 72.9, 70.6, 67.6, 55.3, 38.6, 33.9, 29.4; HRMS (EI-magnetic sector)  $m/z$ :  $[\text{M}]^+$  Calcd for  $\text{C}_{25}\text{H}_{32}\text{O}_5$  412.2250; Found 412.2242. **[For SI-A-04]**  $[\alpha]^{24}_{\text{D}} = +26.6$  ( $c$  0.77,  $\text{CHCl}_3$ );  $^1\text{H}$  NMR (600 MHz,  $\text{CDCl}_3$ )  $\delta$  7.35–7.30 (m, 4 H), 7.29–7.27 (m, 1 H), 7.22–7.20 (m, 2 H), 6.87–6.84 (m, 2 H), 5.85 (ddt,  $J = 17.2, 10.2, 7.0$  Hz, 1 H), 5.13–5.07 (m, 2 H), 4.48 (AB,  $J_{\text{AB}} = 12.0$  Hz,  $\Delta\nu_{\text{AB}} = 21.82$  Hz, 2 H), 4.40 (AB,  $J_{\text{AB}} = 11.5$  Hz,  $\Delta\nu_{\text{AB}} = 177.83$  Hz, 2 H), 3.98 (ddd,  $J = 8.5, 5.3, 2.8$  Hz, 1 H), 3.90–3.84 (m, 3 H), 3.80 (s, 3 H), 3.60–3.54 (m, 2 H), 2.82 (d,  $J = 1.7$  Hz, 1 H), 2.27–2.22 (m, 1 H), 2.19–2.14 (m, 2 H), 2.04 (ddt,  $J = 13.8, 7.9, 5.8$  Hz, 1 H), 2.01–1.94 (m, 2 H);  $^{13}\text{C}$  NMR (150 MHz,  $\text{CDCl}_3$ )  $\delta$  159.2, 138.5, 134.7, 129.9, 129.4, 128.3, 127.7, 127.5, 117.2, 113.8, 80.0, 79.6, 78.2, 73.0, 71.3, 70.4, 67.7, 55.3, 38.1, 30.2, 29.3; HRMS (FAB-magnetic sector)  $m/z$ :  $[\text{M}+\text{H}]^+$  Calcd for  $\text{C}_{25}\text{H}_{33}\text{O}_5$  413.2328; Found 413.2328.

### Confirmation of C(10) Absolute Stereochemistry in Secondary Alcohol **9**

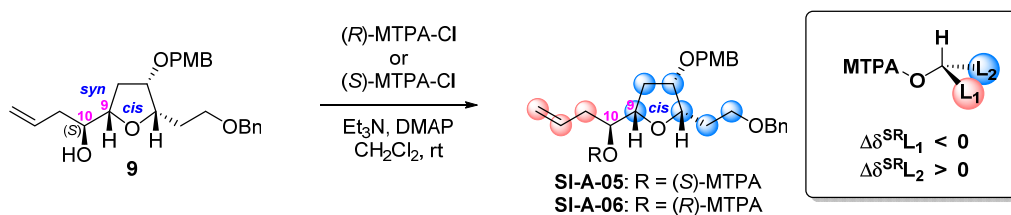

To a solution of (10*S*)-alcohol **9** in  $\text{CH}_2\text{Cl}_2$  were successively added (*R*)- or (*S*)- $\alpha$ -methoxy- $\alpha$ -trifluoromethylphenylacetyl chloride (5.0 eq),  $\text{Et}_3\text{N}$  (6.0 eq), and DMAP (0.4 eq) at room temperature. After stirring for 40 min at the same temperature, the reaction mixture was quenched with saturated aqueous  $\text{NaHCO}_3$ , diluted with  $\text{Et}_2\text{O}$ . The layers were separated, and the aqueous layer was extracted with  $\text{Et}_2\text{O}$ . The combine layers were washed with brine, dried over anhydrous  $\text{Na}_2\text{SO}_4$ , filtered, and concentrated *in vacuo*. The residue was purified by column chromatography (silica gel, hexanes/ethyl acetate, 10:1) to afford the crude (*S*)-MTPA ester **SI-A-05** or (*R*)-MTPA ester **SI-A-06** as a colorless oil: **[For (*S*)-Mosher Derivative SI-A-05]**  $^1\text{H}$  NMR (600 MHz,  $\text{CDCl}_3$ )  $\delta$  7.63–7.61 (m, 2 H), 7.37–7.35 (m, 3 H), 7.34–7.27 (m, 5 H), 7.23–7.21 (m, 2 H), 6.88–6.86 (m, 2 H), 5.64–5.57 (m, 1 H), 5.31 (td,  $J = 7.8, 3.7$  Hz, 1 H), 4.97 (s, 1 H), 4.95 (d,  $J = 6.3$  Hz, 1 H), 4.47–4.42 (m, 2 H), 4.40 (AB,  $J_{\text{AB}} = 11.7$  Hz,  $\Delta\nu_{\text{AB}} = 85.1$  Hz, 2 H), 3.99–3.96 (m, 3 H), 3.80 (s, 3 H), 3.58 (s, 3 H), 3.54 (t,  $J = 6.4$  Hz, 2 H), 2.42–2.38 (m, 1 H), 2.22 (dt,  $J = 15.2, 7.8$  Hz, 1 H), 2.18–2.13 (m, 1 H), 1.98 (q,  $J = 6.8$  Hz, 2 H),

1.83–1.79 (m, 1 H); HRMS (FAB-magnetic sector)  $m/z$ :  $[M+H]^+$  Calcd for  $C_{35}H_{40}F_3O_7$  629.2726; Found 629.2719. [**For (R)-Mosher Derivative SI-A-06**]  $^1H$  NMR (600 MHz,  $CDCl_3$ )  $\delta$  7.59–7.58 (m, 2 H), 7.37–7.36 (m, 3 H), 7.34–7.27 (m, 5 H), 7.20–7.17 (m, 2 H), 6.87–6.84 (m, 2 H), 5.81–5.74 (m, 1 H), 5.32 (ddd,  $J = 8.1, 6.9, 3.9$  Hz, 1 H), 5.12–5.08 (m, 2 H), 4.46–4.42 (m, 2 H), 4.34 (AB,  $J_{AB} = 11.6$  Hz,  $\Delta\nu_{AB} = 89.9$  Hz, 2 H), 3.96–3.90 (m, 3 H), 3.80 (s, 3 H), 3.51 (s, 3 H), 3.53–3.50 (m, 2 H), 2.52–2.48 (m, 1 H), 2.33 (dt,  $J = 15.5, 8.1$  Hz, 1 H), 2.04 (ddd,  $J = 13.6, 7.8, 5.9$  Hz, 1 H), 1.96–1.86 (m, 2 H), 1.74 (ddd,  $J = 13.5, 7.0, 3.4$  Hz, 1 H); HRMS (FAB-magnetic sector)  $m/z$ :  $[M+H]^+$  Calcd for  $C_{35}H_{40}F_3O_7$  629.2726; Found 629.2722.

### Preparation of Alkene 20

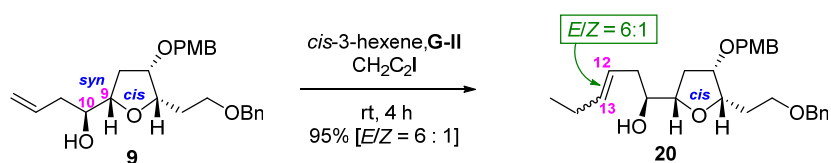

To a solution of (10*S*)-alcohol **9** (670.8 mg, 1.626 mmol) in dry  $CH_2Cl_2$  (16.3 mL, 0.1 M) were added *cis*-3-hexene (2.01 mL, 16.3 mmol) and second-generation Grubb's catalyst  $[(H_2IMes)(Cy_3P)Cl_2Ru=CHPh, \mathbf{G-II}, 138.0$  mg, 0.163 mmol]<sup>4</sup> at room temperature. After being stirred for 4 h at the same temperature, the reaction mixture was quenched with dimethyl sulfoxide (0.5 mL), stirred for 15 h, and concentrated *in vacuo*. Purification of the residue by column chromatography (silica gel, hexanes/ethyl acetate, 5 : 1) to afford the inseparable mixture of alkene **20** (680.5 mg, 95% yield,  $E/Z = 6 : 1$ , see page S69) as a colorless oil; [**For (12*E*)-20**]  $^1H$  NMR (600 MHz,  $CDCl_3$ )  $\delta$  7.35–7.31 (m, 4 H), 7.29–7.26 (m, 1 H), 7.22–7.19 (m, 2 H), 6.87–6.84 (m, 2 H), 5.58–5.53 (m, 1 H), 5.50–5.45 (m, 1 H), 4.53–4.47 (m, 3 H), 4.27 (d,  $J = 11.4$  Hz, 1 H), 3.94–3.90 (m, 3 H), 3.80 (s, 3 H), 3.62–3.55 (m, 2 H), 3.53–3.48 (m, 1 H), 3.51 (tt,  $J = 6.4, 4.6$  Hz, 1 H), 2.94 (d,  $J = 5.0$  Hz, 1 H), 2.22 (tq,  $J = 6.5, 1.1$  Hz, 2 H), 2.13 (ddd,  $J = 13.9, 8.7, 5.5$  Hz, 1 H), 2.10–1.96 (m, 4 H), 0.97 (t,  $J = 7.5$  Hz, 3 H);  $^{13}C$  NMR (150 MHz,  $CDCl_3$ )  $\delta$  159.2, 138.5, 134.7, 129.9, 129.3, 128.3, 127.6, 127.5, 125.2, 113.8, 79.7, 79.4, 78.6, 73.7, 72.9, 70.6, 67.7, 55.3, 37.3, 34.0, 29.5, 25.6, 13.7; HRMS (EI-magnetic sector)  $m/z$ :  $[M]^+$  Calcd for  $C_{27}H_{36}O_5$  440.2563; Found 440.2558.

## Preparation of Diol 8

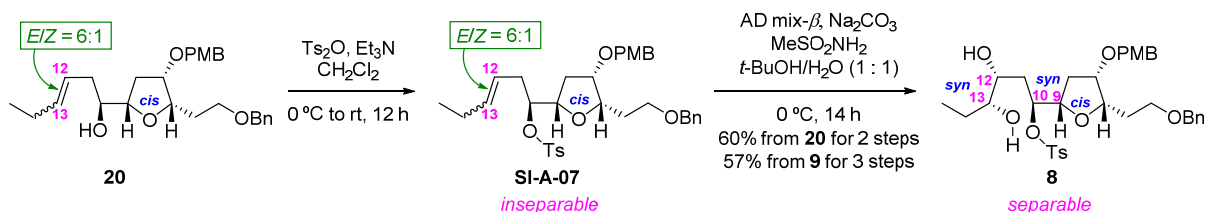

**[Tosylation]** To a cooled ( $0^\circ\text{C}$ ) solution of inseparable mixture of (*E*)/(*Z*)-hex-3-enol **20** (680.5 mg, 1.55 mmol) in dry  $\text{CH}_2\text{Cl}_2$  (20 mL, 0.077 M) was added triethylamine (2.15 mL, 15.5 mmol) and *p*-toluenesulfonyl anhydride ( $\text{Ts}_2\text{O}$ , 210.8 mg, 4.63 mmol). After being stirred for 12 h at room temperature, the reaction mixture was quenched with saturated aqueous  $\text{NaHCO}_3$  and diluted with  $\text{H}_2\text{O}$ . The layers were separated, and the aqueous layer was extracted with  $\text{CH}_2\text{Cl}_2$ . The combined organic layers were washed with saturated brine, dried over anhydrous  $\text{Na}_2\text{SO}_4$ , filtered, and concentrated *in vacuo*. The residue was purified by column chromatography (silica gel, hexanes/ethyl acetate, 6 : 1) to afford the *inseparable mixture* of tosylate **SI-A-07** (878.4 mg, 96%) as a colorless oil: **[For (12*E*)-Tosylate SI-A-07]**  $[\alpha]_D^{25} = -0.70$  (*c* 0.79,  $\text{CHCl}_3$ );  $^1\text{H}$  NMR (600 MHz,  $\text{CDCl}_3$ )  $\delta$  7.78–7.76 (m, 2 H), 7.35–7.30 (m, 4 H), 7.29–7.26 (m, 1 H), 7.24–7.22 (m, 2 H), 7.20–7.18 (m, 2 H), 6.88–6.85 (m, 2 H), 5.46 (dtt,  $J = 15.3, 6.3, 1.3$  Hz, 1 H), 5.21 (dddt,  $J = 15.7, 8.1, 6.7, 1.6$  Hz, 1 H), 4.61–4.58 (m, 1 H), 4.46 (AB,  $J_{\text{AB}} = 11.9$  Hz,  $\Delta\nu_{\text{AB}} = 16.57$  Hz, 2 H), 4.34 (AB,  $J_{\text{AB}} = 11.6$  Hz,  $\Delta\nu_{\text{AB}} = 116.40$  Hz, 2 H), 4.02 (dt,  $J = 8.2, 6.4$  Hz, 1 H), 3.89 (ddd,  $J = 6.0, 4.5, 2.9$  Hz, 1 H), 3.84 (dt,  $J = 8.4, 4.7$  Hz, 1 H), 3.81 (s, 3 H), 3.49–3.43 (m, 2 H), 2.54–2.49 (m, 1 H), 2.39 (s, 3 H), 2.25–2.20 (m, 1 H), 2.08 (ddd,  $J = 13.9, 8.2, 6.0$  Hz, 1 H), 1.95–1.87 (m, 3 H), 1.85–1.82 (m, 1 H), 1.81–1.75 (m, 1 H), 0.91 (t,  $J = 7.4$  Hz, 3 H);  $^{13}\text{C}$  NMR (150 MHz,  $\text{CDCl}_3$ )  $\delta$  159.1, 144.1, 138.6, 136.1, 134.3, 130.2, 129.4, 129.0, 128.3, 128.0, 127.6, 127.5, 122.6, 113.7, 83.8, 79.3, 78.3, 76.9, 72.9, 70.6, 67.5, 55.2, 34.1, 33.0, 29.4, 25.5, 21.5, 13.5; HRMS (EI-magnetic sector)  $m/z$ :  $[\text{M}]^+$  Calcd for  $\text{C}_{34}\text{H}_{42}\text{O}_7\text{S}$  594.2651; Found 594.2654. **[Sharpless Asymmetric Dihydroxylation]** To a cooled ( $0^\circ\text{C}$ ) solution of inseparable mixture of tosylate **SI-A-07** (530.7 mg, 0.892 mmol) in *tert*-butanol/ $\text{H}_2\text{O}$  (1 : 1, 10.0 mL, 0.089 M) was added methanesulfonamide (349.2 mg, 3.671 mmol),  $\text{K}_2\text{CO}_3$  (634.3 mg, 4.589 mmol). The reaction mixture was stirred for 30 min at same temperature and AD-mix  $\beta$  (2.12 g, 1.22 mmol) was added. After being stirred at the same temperature for 14 h, the reaction mixture was quenched with saturated aqueous  $\text{Na}_2\text{S}_2\text{O}_3$ , and diluted with  $\text{Et}_2\text{O}$ . The layers were separated, and the aqueous layer was extracted with  $\text{Et}_2\text{O}$ .



The combined organic layers were washed with saturated brine, dried over anhydrous Na<sub>2</sub>SO<sub>4</sub>, and concentrated *in vacuo*. The residue was filtered through a short column of silica gel (hexanes/ethyl acetate, 1 : 1) to afford the pure diol **8** (337.4 mg, 60% for two steps) as a colorless oil:  $[\alpha]^{25}_D = +1.31$  (*c* 1.00, CHCl<sub>3</sub>); <sup>1</sup>H NMR (600 MHz, CDCl<sub>3</sub>) δ 7.79–7.77 (m, 2 H), 7.35–7.27 (m, 5 H), 7.26–7.25 (m, 2 H), 7.20–7.18 (m, 2 H), 6.87–6.85 (m, 2 H), 4.86 (dt, *J* = 6.6, 4.5 Hz, 1 H), 4.45 (AB, *J*<sub>AB</sub> = 12.0 Hz, Δ*v*<sub>AB</sub> = 16.70 Hz, 2 H), 4.34 (AB, *J*<sub>AB</sub> = 11.4 Hz, Δ*v*<sub>AB</sub> = 118.84 Hz, 2 H), 4.09 (ddd, *J* = 8.3, 6.8, 4.6 Hz, 1 H), 3.90 (ddd, *J* = 6.0, 4.4, 2.8 Hz, 1 H), 3.87 (dt, *J* = 8.7, 4.5 Hz, 1 H), 3.80 (s, 3 H), 3.63 (ddd, *J* = 9.1, 4.7, 3.3 Hz, 1 H), 3.49–3.45 (m, 2 H), 3.17 (dt, *J* = 8.7, 4.5 Hz, 1 H), 2.40 (s, 3 H), 2.11 (ddd, *J* = 14.1, 8.3, 6.0 Hz, 1 H), 2.05 (ddd, *J* = 14.9, 6.7, 3.3 Hz, 1 H), 1.98 (ddd, *J* = 13.9, 6.8, 2.8 Hz, 1 H), 1.92–1.82 (m, 2 H), 1.74 (ddd, *J* = 14.9, 9.1, 4.5 Hz, 1 H), 1.45–1.38 (m, 1 H), 1.39–1.31 (m, 1 H), 0.89 (t, *J* = 7.4 Hz, 3 H); <sup>13</sup>C NMR (150 MHz, CDCl<sub>3</sub>) δ 159.0, 144.5, 138.4, 133.9, 130.0, 129.5, 129.0, 128.2, 127.7, 127.5, 127.4, 113.6, 80.6, 79.6, 78.0, 77.3, 75.3, 72.8, 70.4, 69.6, 67.3, 55.1, 35.5, 33.0, 29.1, 26.1, 21.4, 9.9; HRMS (FAB-magnetic sector) *m/z*: [M+H]<sup>+</sup> Calcd for C<sub>34</sub>H<sub>45</sub>O<sub>9</sub>S 629.2784; Found 629.2787.

### Preparation of Adjacent Bis-THF **21**

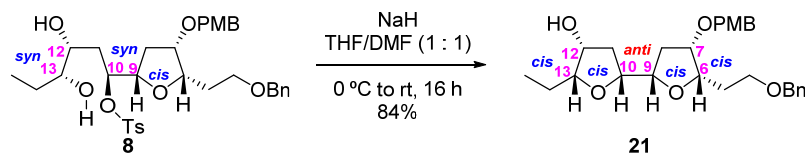

To a cooled (0 °C) solution of diol **8** (51.1 mg, 0.0813 mmol) in THF/DMF (1 : 1, 8.13 mL, 0.01 M) was added sodium hydride (16.26 mg, 0.406 mmol). After being stirred for 16 h at room temperature, the reaction mixture was quenched with saturated aqueous NH<sub>4</sub>Cl and diluted with Et<sub>2</sub>O. The layers were separated, and the aqueous layer was extracted with Et<sub>2</sub>O. The combined organic layers were washed with saturated brine, dried over anhydrous Na<sub>2</sub>SO<sub>4</sub>, filtered, and concentrated *in vacuo*. The residue was purified by column chromatography (silica gel, hexanes/ethyl acetate, 2 : 1) to afford the adjacent bis-THF **21** (31.2 mg, 84%) as a colorless oil:  $[\alpha]^{24}_D = +18.1$  (*c* 1.00, CHCl<sub>3</sub>); <sup>1</sup>H NMR (600 MHz, CDCl<sub>3</sub>) δ 7.34–7.29 (m, 4 H), 7.28–7.25 (m, 1 H), 7.21–7.18 (m, 2 H), 6.87–6.85 (m, 2 H), 4.50–4.43 (m, 3 H), 4.25 (d, *J* = 11.7 Hz, 1 H), 4.18–4.13 (m, 2 H), 3.99–3.96 (m, 2 H), 3.90 (ddd, *J* = 6.1, 4.0, 1.7 Hz, 1 H), 3.83 (d, *J* = 11.1 Hz, 1 H), 3.80 (s, 3 H), 3.58–3.52 (m, 3 H), 2.28 (dd, *J* = 14.0, 2.6 Hz, 1 H), 2.19

(ddd,  $J = 13.9, 8.9, 6.4$  Hz, 1 H), 2.16–2.08 (m, 2 H), 2.06–2.01 (m, 1 H), 1.78–1.66 (m, 2 H), 1.61 (ddd,  $J = 14.1, 7.0, 1.7$  Hz, 1 H), 0.97 (t,  $J = 7.5$  Hz, 3 H);  $^{13}\text{C}$  NMR (150 MHz,  $\text{CDCl}_3$ )  $\delta$  159.1, 138.5, 130.1, 129.0, 128.3, 127.7, 127.5, 113.8, 86.2, 80.5, 79.3, 78.6, 78.2, 72.9, 70.7, 70.4, 67.4, 55.3, 34.5, 33.6, 28.9, 21.9, 10.5; HRMS (EI-magnetic sector)  $m/z$ :  $[\text{M}]^+$  Calcd for  $\text{C}_{27}\text{H}_{36}\text{O}_6$  456.2512; Found 456.2510.

### Preparation of Adjacent Bis-THF 21<sup>5</sup>

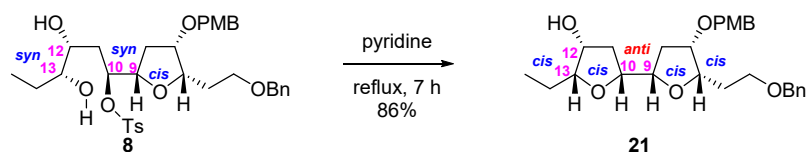

Diol **8** (178.4 mg, 0.284 mmol) was dissolved in pyridine (28 mL, 0.01 M), and the resulting solution was refluxed for 7 h. The reaction mixture was cooled to room temperature, concentrated *in vacuo*, and diluted with  $\text{Et}_2\text{O}$  and  $\text{H}_2\text{O}$ . The layers were separated, and the aqueous layer was extracted with  $\text{Et}_2\text{O}$ . The combined organic layers were washed with saturated brine, dried over anhydrous  $\text{Na}_2\text{SO}_4$ , filtered, and concentrated *in vacuo*. The residue was purified by column chromatography (silica gel, hexanes/ethyl acetate, 3 : 1) to afford the adjacent bis-THF **21** (110.9 mg, 86%) as a colorless oil.

### Construction of 7,12-Dibromo Adjacent bis-THF 6: S18 ~ S23

#### Scheme ESI-03. Synthesis of 7,12-Dibromo-Adjacent Bis-THF 6 in Step-By-Step Manner

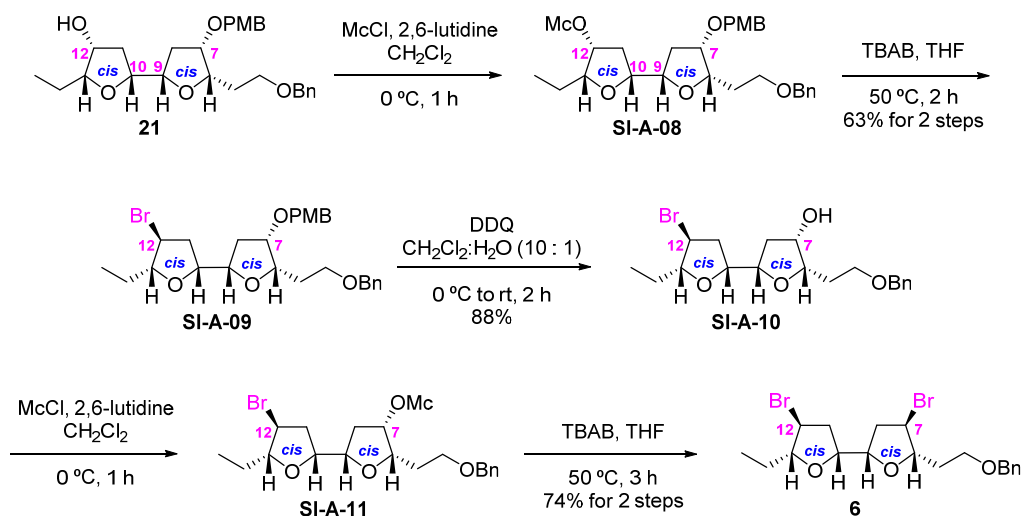

## Preparation of 12-Bromo-Adjacent bis-THF SI-A-09

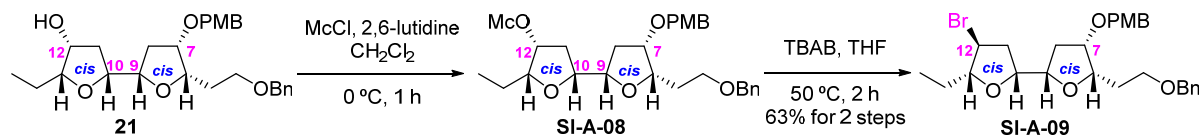

**[Chloromethanesulfonylation]** To a cooled ( $0\text{ }^\circ\text{C}$ ) solution of 12-hydroxy-adjacent bis-THF **21** (272.9 mg, 0.598 mmol) in  $\text{CH}_2\text{Cl}_2$  (6 mL, 0.1 M) were dropwise added 2,6-lutidine (1.11 mL, 9.56 mmol) and chloromethanesulfonyl chloride ( $\text{McCl}$ , 0.434 mL, 4.78 mmol). The resulting mixture was stirred for 1 h at the same temperature, quenched with saturated aqueous  $\text{NaHCO}_3$ , and diluted with  $\text{CH}_2\text{Cl}_2$ . The layers were separated, and the aqueous layer was extracted with  $\text{CH}_2\text{Cl}_2$ . The combined organic layers were washed with  $\text{H}_2\text{O}$  and brine, dried over anhydrous  $\text{Na}_2\text{SO}_4$ , and concentrated *in vacuo*. The residue was filtered through a short pad of silica gel (hexanes/ethyl acetate, 4 : 1) to afford the crude chloromethanesulfonate **SI-A-08** (296.0 mg, 92%) as a brown oil:  $[\alpha]^{24}_{\text{D}} = +15.4$  ( $c$  1.00,  $\text{CHCl}_3$ );  $^1\text{H}$  NMR (600 MHz,  $\text{CDCl}_3$ )  $\delta$  7.35–7.31 (m, 4 H), 7.29–7.27 (m, 1 H), 7.22–7.20 (m, 2 H), 6.87–6.84 (m, 2 H), 5.23 (ddd,  $J = 6.0, 3.3, 1.4$  Hz, 1 H), 4.56 (s, 2 H), 4.49 (AB,  $J_{\text{AB}} = 11.9$  Hz,  $\Delta\nu_{\text{AB}} = 21.76$  Hz, 2 H), 4.39 (AB,  $J_{\text{AB}} = 11.5$  Hz,  $\Delta\nu_{\text{AB}} = 138.66$  Hz, 2 H), 3.94–3.87 (m, 4 H), 3.80 (s, 3 H), 3.67 (ddd,  $J = 7.2, 6.1, 3.3$  Hz, 1 H), 3.59–3.56 (m, 2 H), 2.49–2.44 (m, 1 H), 2.35 (ddd,  $J = 15.2, 5.0, 1.4$  Hz, 1 H), 2.20 (ddd,  $J = 13.4, 7.5, 5.7$  Hz, 1 H), 2.05 (ddd,  $J = 13.7, 4.8, 1.9$  Hz, 1 H), 2.01–1.98 (m, 2 H), 1.79–1.71 (m, 2 H), 1.03 (t,  $J = 7.5$  Hz, 3 H);  $^{13}\text{C}$  NMR (150 MHz,  $\text{CDCl}_3$ )  $\delta$  159.1, 138.6, 130.3, 129.1, 128.3, 127.6, 127.5, 113.7, 85.6, 83.7, 79.9, 79.7, 79.3, 78.7, 72.8, 70.4, 67.6, 55.2, 54.2, 36.4, 34.7, 29.6, 22.2, 10.5. **[ $\text{S}_{\text{N}}2$  Displacement]** To a solution of the above crude chloromethanesulfonate **SI-A-08** in THF (30 mL, 0.018 M) was added tetrabutylammonium bromide (TBAB, 1.78 g, 5.54 mmol). After being stirred at  $50\text{ }^\circ\text{C}$  for 2 h, the reaction mixture was cooled to room temperature, quenched with  $\text{H}_2\text{O}$ , and diluted with  $\text{Et}_2\text{O}$ . The layers were separated and the aqueous layer was extracted with  $\text{Et}_2\text{O}$ . The combined organic layers were washed with brine, dried over anhydrous  $\text{Na}_2\text{SO}_4$ , and concentrated *in vacuo*. The residue was purified by column chromatography (silica gel, hexanes/ethyl acetate, 5 : 1 to 4 : 1) to afford 12-bromo-adjacent bis-THF **SI-A-09** (198.5 mg, 69% yield for two steps) as a colorless oil:  $[\alpha]^{25}_{\text{D}} = +29.8$  ( $c$  1.00,  $\text{CHCl}_3$ );  $^1\text{H}$  NMR (600 MHz,  $\text{CDCl}_3$ )  $\delta$  7.35–7.31 (m, 4 H), 7.29–7.26 (m, 1 H), 7.22–7.20 (m, 2 H), 6.87–6.85 (m, 2 H), 4.48 (AB,  $J_{\text{AB}} = 12.0$  Hz,  $\Delta\nu_{\text{AB}} = 22.48$  Hz, 2 H), 4.38 (AB,  $J_{\text{AB}} = 11.6$  Hz,  $\Delta\nu_{\text{AB}} = 142.39$  Hz, 2 H), 4.15 (q,  $J$

= 6.8 Hz, 1 H), 4.00–3.94 (m, 2 H), 3.93–3.88 (m, 2 H), 3.85 (dt,  $J = 8.2, 6.0$  Hz, 1 H), 3.80 (s, 3 H), 3.57 (t,  $J = 6.5$  Hz, 2 H), 2.48 (dt,  $J = 13.7, 6.9$  Hz, 1 H), 2.28 (ddd,  $J = 13.7, 7.0, 5.2$  Hz, 1 H), 2.17 (ddd,  $J = 14.0, 8.2, 5.9$  Hz, 1 H), 2.04–1.96 (m, 2 H), 1.93 (ddd,  $J = 13.8, 6.1, 2.3$  Hz, 1 H), 1.69–1.62 (m, 1 H), 1.51 (dp,  $J = 14.5, 7.3$  Hz, 1 H), 0.98 (t,  $J = 7.4$  Hz, 3 H);  $^{13}\text{C}$  NMR (150 MHz,  $\text{CDCl}_3$ )  $\delta$  159.1, 138.6, 130.3, 129.1, 128.3, 127.6, 127.4, 113.7, 88.4, 80.2, 79.7, 79.1, 78.5, 72.8, 70.4, 67.6, 55.2, 49.3, 38.5, 34.6, 29.5, 26.5, 10.0; HRMS (EI-magnetic sector)  $m/z$ :  $[\text{M}]^+$  Calcd for  $\text{C}_{27}\text{H}_{35}\text{BrO}_5$  518.1668; Found 518.1669.

### Preparation of 7-Hydroxyl- 12-Bromo-Adjacent Bis-THF **SI-A-10**

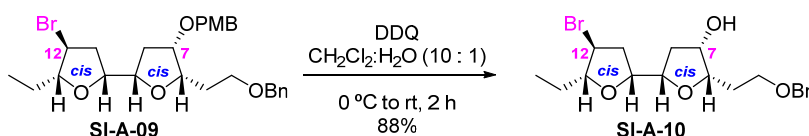

To a cooled (0 °C) solution of 12-bromo-adjacent bis-THF **SI-A-09** (283.8 mg, 0.546 mmol) in  $\text{CH}_2\text{Cl}_2/\text{H}_2\text{O}$  (10 : 1, 11 mL, 0.05 M) was added 2,3-dichloro-5,6-dicyano-*p*-benzoquinone (DDQ, 186.6 mg, 0.820 mmol). After being stirred for 2 h at the room temperature, the reaction mixture was quenched with saturated aqueous  $\text{NaHCO}_3$  and diluted with  $\text{CH}_2\text{Cl}_2$ . The layers were separated, and the aqueous layer was extracted with  $\text{CH}_2\text{Cl}_2$ . The combined organic layers were washed with saturated brine, dried over anhydrous  $\text{Na}_2\text{SO}_4$ , filtered, and concentrated *in vacuo*. The residue was purified by column chromatography (silica gel, hexanes/ethyl acetate, 4 : 1) to afford 7-hydroxyl-12-bromo-adjacent bis-THF **SI-A-10** (196.2 mg, 88%) as a colorless oil:  $[\alpha]_D^{24} = +23.2$  ( $c$  1.00,  $\text{CHCl}_3$ );  $^1\text{H}$  NMR (600 MHz,  $\text{CDCl}_3$ )  $\delta$  7.36–7.31 (m, 4 H), 7.29–7.26 (m, 1 H), 4.52 (s, 2 H), 4.35 (ddd,  $J = 8.4, 6.9, 3.0$  Hz, 1 H), 4.09–4.04 (m, 3 H), 3.93 (ddd,  $J = 7.8, 5.8, 4.8$  Hz, 1 H), 3.80 (dt,  $J = 6.9, 3.4$  Hz, 1 H), 3.64 (dt,  $J = 9.5, 5.3$  Hz, 1 H), 3.59 (ddd,  $J = 9.5, 8.5, 4.5$  Hz, 1 H), 3.45 (d,  $J = 8.5$  Hz, 1 H), 2.29–2.19 (m, 3 H), 2.09–2.03 (m, 1 H), 2.01–2.96 (m, 1 H), 1.79 (ddd,  $J = 14.0, 4.0, 1.1$  Hz, 1 H), 1.70 (dddd,  $J = 15.0, 12.6, 6.9, 5.1$  Hz, 1 H), 1.60–1.53 (m, 1 H), 1.01 (t,  $J = 7.5$  Hz, 3 H);  $^{13}\text{C}$  NMR (150 MHz,  $\text{CDCl}_3$ )  $\delta$  138.1, 128.4, 127.66, 127.64, 88.8, 81.9, 79.2, 78.2, 73.1, 71.6, 67.4, 48.4, 38.6, 35.4, 29.2, 26.4, 10.1; HRMS (EI-magnetic sector)  $m/z$ :  $[\text{M}]^+$  Calcd for  $\text{C}_{19}\text{H}_{27}\text{BrO}_4$  398.1093; Found 398.1094.

## Preparation of 7,12-Dibromo-Adjacent Bis-THF **6**

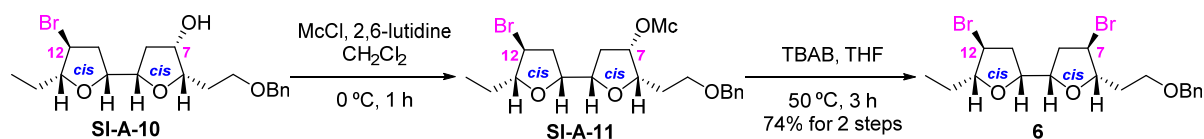

**[Chloromethanesulfonylation]** To a cooled ( $0\text{ }^\circ\text{C}$ ) solution of 7-hydroxy-12-bromo-adjacent bis-THF **SI-A-10** (196.2 mg, 0.491 mmol) in  $\text{CH}_2\text{Cl}_2$  (5 mL, 0.1 M) were dropwise added 2,6-lutidine (0.916 mL, 7.86 mmol) and chloromethanesulfonyl chloride ( $\text{McCl}$ , 0.357 mL, 3.93 mmol). The resulting mixture was stirred for 1 h at the same temperature, quenched with saturated aqueous  $\text{NaHCO}_3$ , and diluted with  $\text{CH}_2\text{Cl}_2$ . The layers were separated, and the aqueous layer was extracted with  $\text{CH}_2\text{Cl}_2$ . The combined organic layers were washed with  $\text{H}_2\text{O}$  and brine, dried over anhydrous  $\text{Na}_2\text{SO}_4$ , and concentrated *in vacuo*. The residue was filtered through a short pad of silica gel (hexanes/ethyl acetate, 4 : 1) to afford the crude chloromethanesulfonate **SI-A-11** (237.9 mg, 95%) as a brown oil:  $[\alpha]_{\text{D}}^{24} = +14.9$  ( $c$  1.00,  $\text{CHCl}_3$ );  $^1\text{H}$  NMR (600 MHz,  $\text{CDCl}_3$ )  $\delta$  7.36–7.28 (m, 5 H), 5.22 (ddd,  $J = 6.2, 3.3, 1.2$  Hz, 1 H), 4.54 (AB,  $J_{\text{AB}} = 12.7$  Hz,  $\Delta\nu_{\text{AB}} = 23.66$  Hz, 2 H), 4.50 (AB,  $J_{\text{AB}} = 11.8$  Hz,  $\Delta\nu_{\text{AB}} = 12.44$  Hz, 2 H), 4.16 (td,  $J = 6.9, 5.6$  Hz, 1 H), 4.01 (dt,  $J = 7.3, 5.4$  Hz, 1 H), 3.99–3.95 (m, 2 H), 3.88 (dt,  $J = 8.6, 5.8$  Hz, 1 H), 3.66–3.59 (m, 2 H), 2.53 (ddd,  $J = 15.0, 8.6, 6.2$  Hz, 1 H), 2.40 (dt,  $J = 14.3, 7.2$  Hz, 1 H), 2.33 (ddd,  $J = 13.8, 6.9, 5.1$  Hz, 1 H), 2.23 (ddd,  $J = 15.3, 5.9, 1.2$  Hz, 1 H), 2.10–2.04 (m, 1 H), 1.99 (ddt,  $J = 14.3, 7.9, 4.9$  Hz, 1 H), 1.69–1.62 (m, 1 H), 1.52 (td,  $J = 14.4, 7.4$  Hz, 1 H), 0.98 (t,  $J = 7.5$  Hz, 3 H);  $^{13}\text{C}$  NMR (150 MHz,  $\text{CDCl}_3$ )  $\delta$  138.3, 128.5, 127.9, 127.8, 88.7, 85.8, 79.6, 79.5, 78.9, 73.2, 67.0, 54.2, 49.0, 38.7, 36.8, 29.3, 26.7, 10.0. **[S<sub>N</sub>2 Displacement]** To a solution of the chloromethanesulfonate **SI-A-11** (117.5 mg, 0.246 mmol) in THF (14 mL, 0.018 M) was added tetrabutylammonium bromide (TBAB, 0.79 g, 2.46 mmol). After being stirred at  $50\text{ }^\circ\text{C}$  for 3 h, the reaction mixture was cooled to room temperature, quenched with  $\text{H}_2\text{O}$ , and diluted with  $\text{Et}_2\text{O}$ . The layers were separated and the aqueous layer was extracted with  $\text{Et}_2\text{O}$ . The combined organic layers were washed with brine, dried over anhydrous  $\text{Na}_2\text{SO}_4$ , and concentrated *in vacuo*. The residue was purified by column chromatography (silica gel, hexanes/ethyl acetate, 15 : 1 to 10 : 1) to afford 7,12-dibromo-adjacent bis-THF **6** (88.9 mg, 74% for two steps) as a colorless oil:  $[\alpha]_{\text{D}}^{25} = -12.6$  ( $c$  1.00,  $\text{CHCl}_3$ );  $^1\text{H}$  NMR (600 MHz,  $\text{CDCl}_3$ )  $\delta$  7.37–7.33 (m, 4 H), 7.30–7.27 (m, 1 H), 4.52 (AB,  $J_{\text{AB}} = 11.9$  Hz,  $\Delta\nu_{\text{AB}} = 11.38$  Hz, 2 H), 4.22 (dt,  $J = 7.7, 5.0$  Hz, 1 H), 4.15–4.09 (m, 3 H), 4.00 (dt,

$J = 7.4, 5.2$  Hz, 1 H), 3.96–3.93 (m, 1 H), 3.64–3.56 (m, 2 H), 2.33–2.26 (m, 4 H), 1.97 (dddd,  $J = 14.0, 7.7, 6.3, 4.8$  Hz, 1 H), 1.77 (ddt,  $J = 13.6, 7.8, 5.7$  Hz, 1 H), 1.65 (dtd,  $J = 14.9, 7.4, 5.0$  Hz, 1 H), 1.50 (dp,  $J = 14.6, 7.4$  Hz, 1 H), 0.97 (t,  $J = 7.5$  Hz, 3 H);  $^{13}\text{C}$  NMR (150 MHz,  $\text{CDCl}_3$ )  $\delta$  138.4, 128.4, 127.8, 127.7, 88.8, 85.1, 79.6, 79.4, 73.2, 66.8, 49.6, 48.9, 39.1, 38.7, 34.0, 26.8, 10.1; HRMS (EI-magnetic sector)  $m/z$ :  $[\text{M}]^+$  Calcd for  $\text{C}_{19}\text{H}_{26}\text{Br}_2\text{O}_3$  460.0249; Found 460.0243.

### Scheme ESI-04. Synthesis of 7,12-Dibromo-Adjacent Bis-THF **6** in Double Bromination

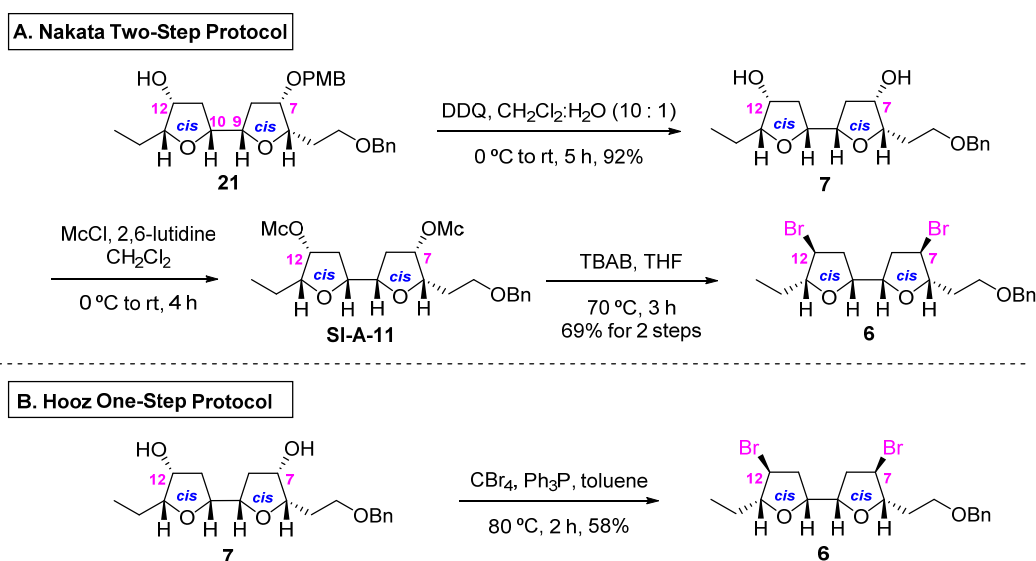

### Preparation of 7,12-Dihydroxy-Adjacent Bis-THF Diol **7**

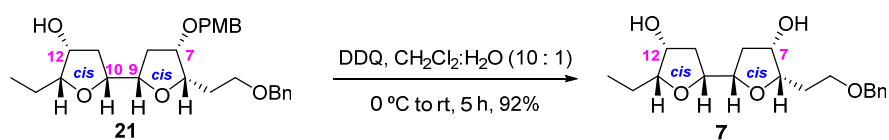

To a cooled (0 °C) solution of 12-dihydroxy-adjacent bis-THF **21** (110.8 mg, 0.243 mmol) in  $\text{CH}_2\text{Cl}_2/\text{H}_2\text{O}$  (10 : 1, 11 mL, 0.022 M) was added 2,3-dichloro-5,6-dicyano-*p*-benzoquinone (DDQ, 208.8 mg, 0.972 mmol). After being stirred for 5 h at the same temperature, the reaction mixture was quenched with saturated aqueous  $\text{NaHCO}_3$  and diluted with  $\text{CH}_2\text{Cl}_2$ . The layers were separated, and the aqueous layer was extracted with  $\text{CH}_2\text{Cl}_2$ . The combined organic layers were washed with saturated brine, dried over anhydrous  $\text{Na}_2\text{SO}_4$ , filtered, and concentrated *in vacuo*. The residue was purified by column chromatography (silica gel, hexanes/ethyl acetate, 2 : 1) to afford 7,12-dihydroxy-adjacent bis-THF **7** (75.1 mg, 92%) as a colorless oil:  $[\alpha]_D^{24} = +23.2$  ( $c$  1.00,  $\text{CHCl}_3$ );  $^1\text{H}$  NMR (600 MHz,  $\text{CDCl}_3$ )  $\delta$  7.36–7.33 (m, 2 H), 7.31–7.28 (m, 3 H),

4.51 (AB,  $J_{AB} = 11.7$  Hz,  $\Delta\nu_{AB} = 14.46$  Hz, 2 H), 4.23 (dtd,  $J = 7.0, 3.5, 1.4$  Hz, 1 H), 4.17–4.12 (m, 2 H), 4.02 (ddt,  $J = 10.1, 4.2, 2.0$  Hz, 1 H), 3.80 (ddd,  $J = 9.4, 5.1, 3.3$  Hz, 1 H), 3.67 (ddd,  $J = 9.4, 4.9, 3.7$  Hz, 1 H), 3.56–3.51 (m, 2 H), 3.46 (d,  $J = 10.2$  Hz, 1 H), 3.37 (d,  $J = 3.7$  Hz, 1 H), 2.32 (dddd,  $J = 14.0, 9.2, 6.8, 0.8$  Hz, 1 H), 2.23–2.14 (m, 3 H), 2.02 (dtd,  $J = 14.5, 4.9, 2.5$  Hz, 1 H), 1.75–1.67 (m, 2 H), 1.63 (ddd,  $J = 14.1, 6.6, 1.5$  Hz, 1 H), 0.97 (t,  $J = 7.5$  Hz, 3 H);  $^{13}\text{C}$  NMR (150 MHz,  $\text{CDCl}_3$ )  $\delta$  137.5, 128.5, 127.9, 127.8, 86.0, 83.4, 79.1, 78.7, 73.6, 71.7, 70.9, 67.1, 36.2, 34.3, 28.6, 21.8, 10.5; HRMS (FAB-magnetic sector)  $m/z$ :  $[\text{M}+\text{H}]^+$  Calcd for  $\text{C}_{19}\text{H}_{29}\text{O}_5$  337.2015; Found 337.2017.

### Preparation of 7,12-Dibromo-Adjacent Bis-THF **6** by Modified Nakata Two-Step Protocol.

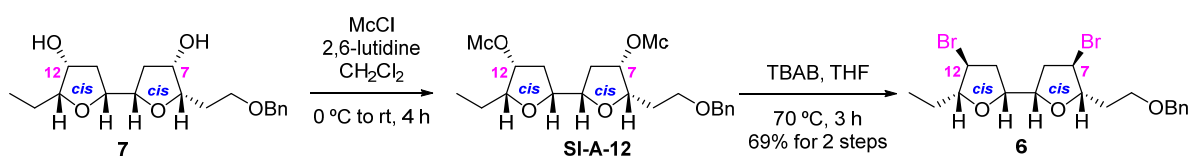

**[Chloromethanesulfonylation]** To a cooled ( $0\text{ }^\circ\text{C}$ ) solution of 7,12-dihydroxy-adjacent bis-THF **7** (42.5 mg, 0.126 mmol) in  $\text{CH}_2\text{Cl}_2$  (5 mL, 0.025 M) were dropwise added 2,6-lutidine (0.294 mL, 2.52 mmol) and chloromethanesulfonyl chloride (McCl, 0.069 mL, 0.738 mmol). The resulting mixture was stirred for 4 h at room temperature, quenched with saturated aqueous  $\text{NaHCO}_3$ , and diluted with  $\text{CH}_2\text{Cl}_2$ . The layers were separated, and the aqueous layer was extracted with  $\text{CH}_2\text{Cl}_2$ . The combined organic layers were washed with  $\text{H}_2\text{O}$  and brine, dried over anhydrous  $\text{Na}_2\text{SO}_4$ , and concentrated *in vacuo*. The residue was filtered through a short pad of silica gel (hexanes/ethyl acetate, 10 : 1) to afford the crude bis-chloromethanesulfonate **SI-A-12** as a brown oil, which was immediately employed to the next step without further purification. **[ $\text{S}_{\text{N}}2$  Displacement]** To a solution of the above crude bis-chloromethanesulfonate **SI-A-12** in THF (15 mL) was added tetrabutylammonium bromide (TBAB, 407.3 mg, 1.26 mmol). After being stirred at  $70\text{ }^\circ\text{C}$  for 3 h, the reaction mixture was cooled to room temperature, quenched with  $\text{H}_2\text{O}$ , and diluted with  $\text{Et}_2\text{O}$ . The layers were separated and the aqueous layer was extracted with  $\text{Et}_2\text{O}$ . The combined organic layers were washed with brine, dried over anhydrous  $\text{Na}_2\text{SO}_4$ , and concentrated *in vacuo*. The residue was purified by column chromatography (silica gel, hexanes/ethyl acetate, 40 : 1 to 10 : 1) to afford 7,12-dibromo-adjacent bis-THF **6** (40.3 mg, 69% yield for two steps) as a colorless oil.

## Preparation of 7,12-Dibromo-Adjacent Bis-THF **6** by Hooz One-Step Protocol.

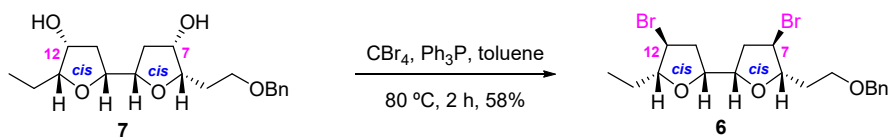

To a solution of 7,12-dihydroxy-adjacent bis-THF **7** (30.3 mg, 0.0901 mmol) in dry toluene (3.60 mL, 0.025 M) were added  $\text{CBr}_4$  (14.6 mg, 0.0440 mmol) and  $\text{Ph}_3\text{P}$  (116 mg, 0.442 mmol) at room temperature. After being stirred at  $80^\circ\text{C}$  for 2 h, the reaction mixture was cooled to rt, quenched with saturated aqueous  $\text{NaHCO}_3$ , and diluted with  $\text{Et}_2\text{O}$ . The layers were separated, the aqueous layer was extracted with  $\text{Et}_2\text{O}$ . The combined organic layers were washed with saturated brine, dried over anhydrous  $\text{Na}_2\text{SO}_4$ , filtered, and concentrated *in vacuo*. The residue was purified by column chromatography (silica gel, hexanes/ethyl acetate, 20 : 1) to afford 7,12-dibromo-adjacent bis-THF **6** (24.2 mg, 58%).

## Completion of Total Synthesis of (3*Z*)- and (3*E*)-Elatenyne: S25 ~ S29

### Scheme ESI-05. Completion of Total Synthesis of **1a** and **1b**.

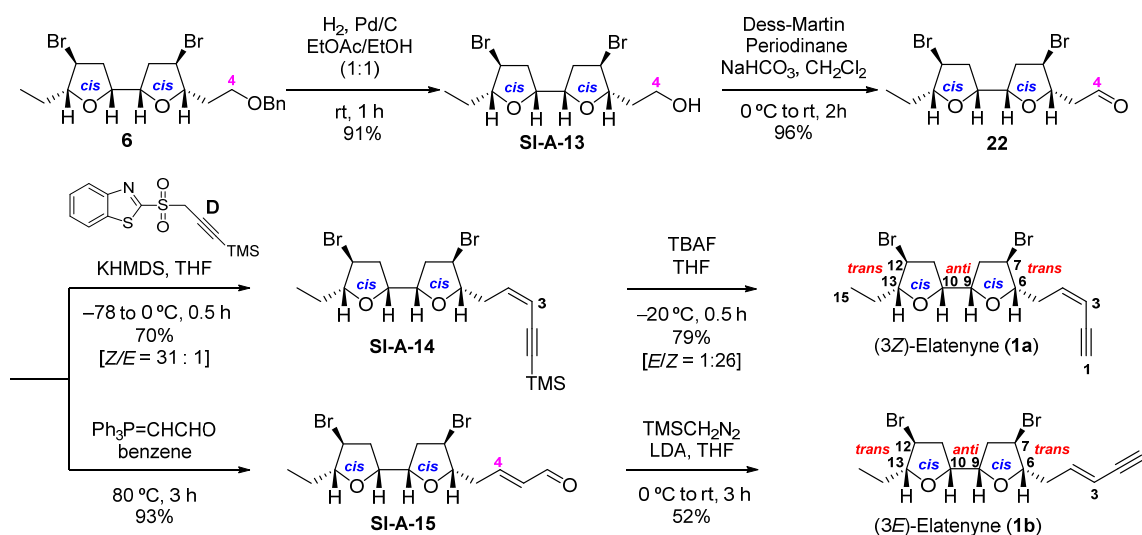



## Preparation of Primary Alcohol SI-A-13

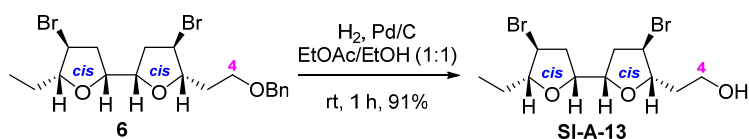

To a solution of 7,12-dibromo-adjacent bis-THF **6** (88.9 mg, 0.192 mmol) in EtOH/EtOAc (1 : 1, 20 mL, 0.01 M) was added palladium on carbon (Pd/C, 88.0 mg, 0.827 mmol) under H<sub>2</sub> gas. After being stirred for 1 h at the room temperature, the reaction mixture was filtered through a pad of celite and concentrated *in vacuo*. The residue was purified by column chromatography (silica gel, hexanes/ethyl acetate, 5 : 1) to afford primary alcohol **SI-A-13** (65.2 mg, 91%) as a colorless oil:  $[\alpha]_D^{25} = -2.63$  (*c* 0.99, CHCl<sub>3</sub>); <sup>1</sup>H NMR (600 MHz, CDCl<sub>3</sub>)  $\delta$  4.21–4.15 (m, 3 H), 4.04–3.99 (m, 2 H), 3.95 (dt, *J* = 7.4, 5.1 Hz, 1 H), 3.82–3.77 (m, 2 H), 2.39 (ddd, *J* = 13.8, 7.6, 6.4 Hz, 1 H), 2.33–2.27 (m, 3 H), 2.25–2.22 (m, 1 H), 2.03–1.98 (m, 1 H), 1.76–1.70 (m, 1 H), 1.66 (dq, *J* = 15.0, 7.5, 5.0 Hz, 1 H), 1.54–1.47 (m, 1 H), 0.98 (t, *J* = 7.4 Hz, 3 H); <sup>13</sup>C NMR (150 MHz, CDCl<sub>3</sub>)  $\delta$  88.8, 86.4, 79.8, 79.1, 60.5, 48.7, 48.6, 38.9, 38.1, 35.2, 26.8, 10.1; HRMS (FAB-magnetic sector) *m/z*: [M+H]<sup>+</sup> Calcd for C<sub>12</sub>H<sub>21</sub>Br<sub>2</sub>O<sub>3</sub> 370.9857; Found 370.9854.

## Preparation of Aldehyde 22

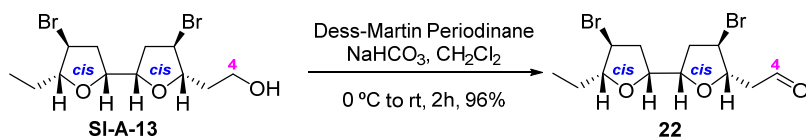

To a cooled (0 °C) solution of primary alcohol **SI-A-13** (13.6 mg, 0.0366 mmol) in CH<sub>2</sub>Cl<sub>2</sub> (2.2 mL, 0.017 M) was added NaHCO<sub>3</sub> (4.60 mg, 0.0548 mmol) and Dess-Martin periodinane (46.5 mg, 0.110 mmol). After being stirred for 2 h at the room temperature, the reaction mixture was quenched with hexane and filtered through a pad of column washing with EtOAc. The residue was concentrated *in vacuo* and purified by column chromatography (silica gel, hexanes/ethyl acetate, 4 : 1) to afford aldehyde **22** (13.0 mg, 96%) as a yellow oil; <sup>1</sup>H NMR (600 MHz, CDCl<sub>3</sub>)  $\delta$  9.78 (dd, *J* = 2.3, 1.6 Hz, 1 H), 4.47 (ddd, *J* = 8.1, 6.5, 4.1 Hz, 1 H), 4.19–4.13 (m, 2 H), 4.03–3.97 (m, 2 H), 3.93 (dt, *J* = 7.5, 5.0 Hz, 1 H), 2.79 (ddd, *J* = 16.5, 4.1, 1.6 Hz, 1 H), 2.64 (ddd, *J* = 16.5, 8.2, 2.3 Hz, 1 H), 2.43 (ddd, *J* = 13.8, 7.7, 6.1 Hz, 1 H), 2.36–2.27 (m, 2 H), 2.25–2.21 (m, 1 H), 1.66 (dq, *J* = 13.8, 7.5, 5.0 Hz, 1 H), 1.49 (dt, *J* = 13.9, 7.4 Hz, 1 H), 0.98 (t, *J* = 7.4 Hz, 3 H); <sup>13</sup>C NMR (150 MHz, CDCl<sub>3</sub>)  $\delta$  199.4, 88.8, 81.94, 81.89,

79.9, 79.0, 48.6, 47.6, 38.9, 37.9, 26.7, 10.0.

### Preparation of TMS-(3Z)-Enyne SI-A-14

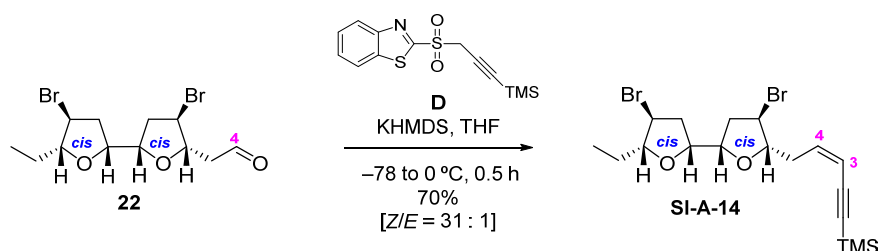

To a cooled ( $-78$  °C) solution of aldehyde **22** (14.1 mg, 0.0381 mmol) and sulfone **D** (117.9 mg, 0.381 mmol) in anhydrous THF (9 mL, 0.0042 M) was dropwise added KHMDS (0.61 mL, 0.5 M solution in toluene, 0.30 mmol). After being stirred for 30 min at  $0$  °C, the reaction mixture was quenched with  $H_2O$  and diluted with EtOAc. The layers were separated, and the aqueous layer was extracted with EtOAc. The combined organic layers were washed with saturated brine, dried over anhydrous  $Na_2SO_4$ , filtered, and concentrated *in vacuo*. The residue was purified by column chromatography (silica gel, ether/ethyl acetate, 50 : 1) to afford TMS-(3Z)-enyne **SI-A-14** (12.4 mg, 70%,  $Z/E = 31 : 1$ , see page S101) as a colorless oil:  $[\alpha]_D^{24} = +2.1$  ( $c$  0.81,  $CHCl_3$ );  $^1H$  NMR (600 MHz,  $CDCl_3$ )  $\delta$  5.99 (dt,  $J = 10.9, 7.5$  Hz, 1 H), 5.64–5.62 (m, 1 H), 4.22 (q,  $J = 5.7$  Hz, 1 H), 4.18–4.13 (m, 2 H), 4.08 (q,  $J = 5.5$  Hz, 1 H), 4.00 (dt,  $J = 7.5, 5.2$  Hz, 1 H), 3.95 (q,  $J = 5.7$  Hz, 1 H), 2.67 (dt,  $J = 13.7, 6.7$  Hz, 1 H), 2.56 (dt,  $J = 14.2, 6.8$  Hz, 1 H), 2.34–2.31 (m, 4 H), 1.70–1.63 (m, 1 H), 1.54–1.47 (m, 1 H), 0.98 (t,  $J = 7.4$  Hz, 3 H), 0.21 (s, 9 H);  $^{13}C$  NMR (150 MHz,  $CDCl_3$ )  $\delta$  139.0, 112.3, 101.3, 99.9, 88.7, 86.6, 79.7, 79.2, 48.8, 48.5, 38.9, 38.7, 34.4, 26.7, 10.0,  $-0.04$ ; HRMS (EI-magnetic sector)  $m/z$ :  $[M]^+$  Calcd for  $C_{18}H_{28}Br_2O_2Si$  462.0225; Found 462.0219.

### Preparation of (3Z)-Elatenyne (1a)

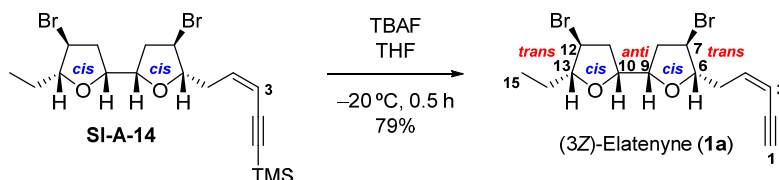

To a cooled ( $-20$  °C) solution of TMS-(3Z)-enyne **SI-A-14** (9.8 mg, 0.0211 mmol) in THF (4.2 mL, 0.005 M) was dropwise added tetrabutylammonium fluoride (0.0593 mL, 0.211 mmol). After being stirred for 30 min at the same temperature, the reaction mixture was quenched with

saturated aqueous NH<sub>4</sub>Cl and diluted with Et<sub>2</sub>O. The layers were separated, and the aqueous layer was extracted with Et<sub>2</sub>O. The combined organic layers were washed with saturated brine, dried over anhydrous Na<sub>2</sub>SO<sub>4</sub>, filtered, and concentrated *in vacuo*. The residue was purified by column chromatography (silica gel, diethyl ether/ethyl acetate, 50 : 1) to afford (3*Z*)-elatenyne (**1a**) (6.5 mg, 79%) as a colorless oil:  $[\alpha]_D^{24} = -1.66$  (*c* 0.18, CH<sub>2</sub>Cl<sub>2</sub>),  $[\alpha]_D^{23} = -1.90$  (*c* 0.62, CHCl<sub>3</sub>); {lit. nat.<sup>6a</sup>  $[\alpha]_D^{25} = +16.8$  (*c* 1.4, CH<sub>2</sub>Cl<sub>2</sub>)}, {nat.<sup>6b</sup>  $[\alpha]_D^{25} = -10.0$  (*c* 0.0498, CH<sub>2</sub>Cl<sub>2</sub>)}, {syn.<sup>6c</sup>  $[\alpha]_D^{25} = -4.00$  (*c* 0.25, CHCl<sub>3</sub>),  $[\alpha]_D^{25} = -1.6$  (*c* 0.25, CH<sub>2</sub>Cl<sub>2</sub>)}, {syn.<sup>6c</sup> **For ent-1a**;  $[\alpha]_D^{25} = +0.85$  (*c* 0.714, CHCl<sub>3</sub>),  $[\alpha]_D^{25} = +0.80$  (*c* 0.714, CH<sub>2</sub>Cl<sub>2</sub>)}; <sup>1</sup>H NMR (600 MHz, CDCl<sub>3</sub>)  $\delta$  6.06 (ddt, *J* = 10.9, 8.6, 1.0 Hz, 1 H), 5.60 (ddt, *J* = 10.9, 2.6, 1.4 Hz, 1 H), 4.22 (q, *J* = 5.7 Hz, 1 H), 4.18–4.13 (m, 2 H), 4.06 (dt, *J* = 6.9, 5.1 Hz, 1 H), 4.01 (dt, *J* = 7.4, 5.1 Hz, 1 H), 3.97 (dd, *J* = 6.5, 5.5 Hz, 1 H), 3.13 (dd, *J* = 2.3, 0.9 Hz, 1 H), 2.70–2.65 (m, 1 H), 2.60–2.56 (m, 1 H), 2.35–2.30 (m, 4 H), 1.70–1.63 (m, 1 H), 1.53–1.47 (m, 1 H), 0.98 (t, *J* = 7.4 Hz, 3 H); <sup>13</sup>C NMR (150 MHz, CDCl<sub>3</sub>)  $\delta$  139.8, 111.1, 88.7, 86.4, 82.4, 79.93, 79.76, 79.2, 48.9, 48.5, 38.9, 38.7, 34.5, 26.7, 10.0; HRMS (EI-magnetic sector) *m/z*: [M]<sup>+</sup> Calcd for C<sub>15</sub>H<sub>20</sub>Br<sub>2</sub>O<sub>2</sub> 389.9830; Found 389.9825.

### Preparation of (3*E*)-Enal SI-A-15

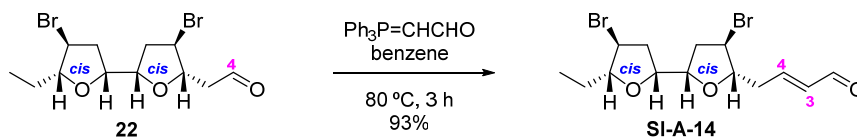

To a solution of aldehyde **23** (13.0 mg, 0.0351 mmol) in dry benzene (0.351 mL, 0.1 M) was added (triphenylphosphoranylidene)acetaldehyde (64.15 mg, 0.211 mmol) at 80 °C. After being stirred at the same temperature for 3 h, the reaction mixture was cooled to rt, and concentrated *in vacuo*. The residue was purified by column chromatography (silica gel, hexanes/ethyl acetate, 10 : 1) to afford (3*E*)-enal **SI-A-15** (12.9 mg, 93%) as a yellow oil; <sup>1</sup>H NMR (600 MHz, CDCl<sub>3</sub>)  $\delta$  9.53 (d, *J* = 7.8 Hz, 1 H), 6.85 (dt, *J* = 15.7, 7.0 Hz, 1 H), 6.21 (ddt, *J* = 15.7, 7.8, 1.5 Hz, 1 H), 4.19–4.14 (m, 3 H), 4.02 (dt, *J* = 7.5, 5.2 Hz, 1 H), 3.96–3.91 (m, 2 H), 2.74 (dddd, *J* = 15.2, 6.7, 4.4, 1.5 Hz, 1 H), 2.55 (dtd, *J* = 15.0, 7.3, 1.4 Hz, 1 H), 2.41 (ddd, *J* = 13.7, 7.8, 6.1 Hz, 1 H), 2.35–2.28 (m, 2 H), 2.23 (dt, *J* = 13.8, 7.5 Hz, 1 H), 1.65 (dtd, *J* = 14.9, 7.5, 5.0 Hz, 1 H), 1.53–1.45 (m, 1 H), 0.97 (t, *J* = 7.4 Hz, 3 H); <sup>13</sup>C NMR (150 MHz, CDCl<sub>3</sub>)  $\delta$  193.6, 152.5, 135.2, 88.8, 85.1, 79.7, 79.0, 48.6, 47.4, 39.0, 38.0, 36.1, 26.7, 10.0.

## Preparation of (3E)-Elatenyne (1b)

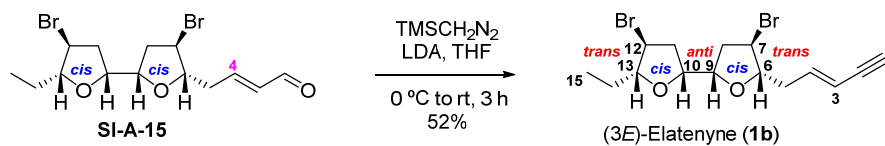

To a cooled ( $-78\text{ }^{\circ}\text{C}$ ) solution of LDA (1.33 mL, 0.66 mmol) in THF (1.33 mL, 0.05 M) was added dropwise TMSCH<sub>2</sub>N<sub>2</sub> (0.37 mL, 1.8 M in hexane, 0.66 mmol) under N<sub>2</sub> atmosphere. After the mixture was stirred at the same temperature for 30 min, (3E)-enal **SI-A-15** (26.3 mg, 0.0664 mmol) in THF (1 mL) was dropwise added at the same temperature. After being stirred for 3 h at 0 °C, the reaction mixture was quenched with saturated aqueous NH<sub>4</sub>Cl and diluted with EtOAc. The layers were separated, and the aqueous layer was extracted with EtOAc. The combined organic layers were washed with saturated brine, dried over anhydrous Na<sub>2</sub>SO<sub>4</sub>, filtered, and concentrated *in vacuo*. The residue was purified by column chromatography (silica gel, hexanes/ethyl acetate, 50 : 1) to afford (3E)-elatenyne (**1b**) (13.6 mg, 52%) as a colorless oil:  $[\alpha]^{24}_{\text{D}} = -28.3$  (*c* 0.66, CHCl<sub>3</sub>);  $[\alpha]^{24}_{\text{D}} = -22.3$  (*c* 0.25, CH<sub>2</sub>Cl<sub>2</sub>); {lit. syn.<sup>6d</sup>  $[\alpha]^{25}_{\text{D}} = -33.0$  (*c* 0.09, CH<sub>2</sub>Cl<sub>2</sub>)}, {For *ent*-**1b**, lit. syn.<sup>6d</sup>  $[\alpha]^{25}_{\text{D}} = +29.5$  (*c* 0.35, CH<sub>2</sub>Cl<sub>2</sub>)}; <sup>1</sup>H NMR (600 MHz, CDCl<sub>3</sub>)  $\delta$  6.23 (dt, *J* = 15.9, 7.2 Hz, 1 H), 5.57 (dq, *J* = 16.0, 1.8 Hz, 1 H), 4.15–4.10 (m, 3 H), 4.01 (dt, *J* = 7.4, 5.2 Hz, 1 H), 3.94 (dq, *J* = 7.4, 5.2 Hz, 2 H), 2.83 (d, *J* = 2.2 Hz, 1 H), 2.48 (dddd, *J* = 14.0, 6.9, 4.9, 1.6 Hz, 1 H), 2.37–2.25 (m, 5 H), 1.66 (dtd, *J* = 14.9, 7.5, 5.0 Hz, 1 H), 1.50 (dp, *J* = 14.7, 7.4 Hz, 1 H), 0.99 (t, *J* = 7.4 Hz, 3 H); <sup>13</sup>C NMR (150 MHz, CDCl<sub>3</sub>)  $\delta$  140.6, 111.9, 88.7, 85.9, 81.8, 79.6, 79.1, 76.7, 48.7, 47.8, 38.9, 38.4, 36.5, 26.7, 10.0; HRMS (EI-magnetic sector) *m/z*: [M]<sup>+</sup> Calcd for C<sub>15</sub>H<sub>20</sub>Br<sub>2</sub>O<sub>2</sub> 389.9830; Found 389.9834.

## References: S29

- (1) (a) I. Ohtani, T. Kusumi, Y. Kashman and H. Kakisawa, High-Field FT NMR Application of Mosher's Method. The Absolute Configuration of Marine Terpenoids, *J. Am. Chem. Soc.*, 1991, **113**, 4092–4096. (b) J. A. Dale and H. S. Mosher, Nuclear Magnetic Resonance Enantiomer Regents. Configurational Correlations via Nuclear Magnetic Resonance Chemical Shifts of Diastereomeric Mandelate, *O*-Methylmandelate, and  $\alpha$ -methoxy- $\alpha$ -trifluoromethylphenylacetate (MTPA) Esters, *J. Am. Chem. Soc.*, 1973, **95**, 512–519.
- (2) G. E. Keck and E. P. Boden, Stereocontrolled additions of allyltri-*n*-butyl-stannane to  $\alpha$ -hydroxyaldehyde derivatives. A useful route to monoprotected erythro or threo diols, *Tetrahedron Lett.*, 1984, **25**, 265–268.
- (3) H. Kim, W. J. Choi, J. Jung, S. Kim and D. Kim, Construction of Eight-Membered Ether Rings by Olefin Geometry-Dependent Internal Alkylation: First Asymmetric Total Syntheses of (+)-3-(*E*)- and (+)-3-(*Z*)-Pinnatifidenyne, *J. Am. Chem. Soc.*, 2003, **125**, 10238–10240.
- (4) A. K. Chatterjee, T. -L. Choi, D. P. Sanders and R. H. Grubbs, A General Model for Selectivity in Olefin Cross Metathesis, *J. Am. Chem. Soc.*, 2003, **125**, 11360–11370.
- (5) J. A. Marshall and J. J. Sabatini, Synthesis of *cis*- and *trans*-2,5-Disubstituted Tetrahydrofurans by a Tandem Dihydroxylation- $S_N2$  Cyclization Sequence, *Org. Lett.*, 2005, **7**, 4819–4822.
- (6) (a) J. G. Hall and J. A. Reiss, Elatenyne - a Pyrano[3,2-B]Pyranyl Vinyl Acetylene from the Red Alga *Laurencia elata*, *Aust. J. Chem.*, 1986, **39**, 1401–1409; (b) R. Brkljača and S. Urban, Relative Configuration of the Marine Natural Product Elatenyne using NMR Spectroscopic and Chemical Derivatization Methodologies, *Nat. Prod. Commun.* 2013, **8**, 729–732; (c) D. A. Dias and S. Urban, Phytochemical studies of the southern Australian marine alga, *Laurencia elata*, *Phytochemistry*, 2011, **72**, 2081–2089; (d) B. S. Dyson, J. W. Burton, T. I. Sohn, B. Kim, H. Bae and D. Kim, Total Synthesis and Structure Confirmation of Elatenyne: Success of Computational Methods for NMR Prediction with Highly Flexible Diastereomers, *J. Am. Chem. Soc.*, 2012, **134**, 11781–11790.

– **Electronic Supplementary Information: Part B** –

**Stereoselective total synthesis of (3*Z*)- and (3*E*)-elatenynes**

Soo Yeon Kwak,<sup>a‡</sup> Iljin Shin,<sup>a‡</sup> Hongjun jang,<sup>a</sup> Youngjik Park,<sup>a</sup> Seongju Lim,<sup>a</sup> Dongjoo Lee,<sup>a</sup>  
Hyoungsu Kim,<sup>\*a</sup> and Deukjoon Kim<sup>b</sup>

<sup>a</sup>College of Pharmacy and Research Institute of Pharmaceutical Science and Technology (RIPST), Ajou University, Suwon 16499, Korea

<sup>b</sup>The Research Institute of Pharmaceutical Sciences, College of Pharmacy, Seoul National University, Seoul 08826, Korea

<sup>‡</sup>These authors contributed equally to this work.

\* E-mail: [hkimajou@ajou.ac.kr](mailto:hkimajou@ajou.ac.kr)

**Part B (S30 ~ S113)**  
**Copies of <sup>1</sup>H, <sup>13</sup>C NMR, and Other NMR**

7.5070  
7.5031  
7.5016  
7.5007  
7.4997  
7.4989  
7.4982  
7.4064  
7.4024  
7.4001  
7.3966  
7.3950  
7.3929  
7.3887  
7.3868  
7.3856  
7.3831  
7.3775  
7.3760  
7.3732  
7.3712  
7.3685  
7.3629  
7.3611  
7.3585  
7.3506  
7.3488  
7.3471  
7.3407  
7.3370  
7.3355  
7.3339  
7.3214  
7.3186  
7.3128  
7.3101  
7.3057  
7.2984  
7.2961  
7.2924  
7.2881  
7.2831  
7.2804  
7.2778  
7.2623  
5.0786  
5.0674  
5.0561  
5.0448  
4.4822  
4.4696  
4.4601  
4.4405  
4.4150  
4.3954  
3.5917  
3.5894  
3.5873  
3.5767  
3.5121  
3.5091  
3.5071  
3.4781  
3.4685  
3.4620  
3.4589  
3.4526  
3.4431  
3.3946  
3.3840  
3.3786  
3.3734  
3.3680  
3.3574  
3.1815  
3.1770  
3.1745  
3.1699  
3.1649  
3.1623  
3.1582  
2.8536  
2.8464  
2.8452  
2.8387  
2.7626  
2.6837  
2.6794  
2.6755  
2.6714  
2.0676  
2.0661  
2.0567  
2.0090  
1.9987  
1.9886  
1.9872  
1.9779  
1.2552  
0.8812  
0.8690  
0.0058  
0.0006  
-0.0044  
-0.0053

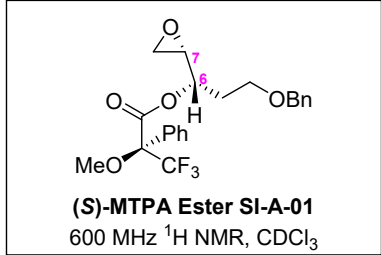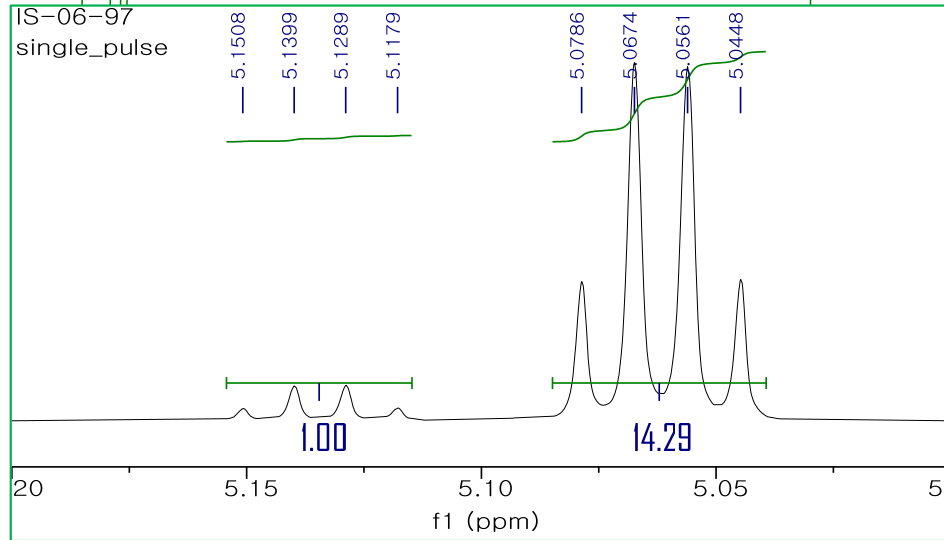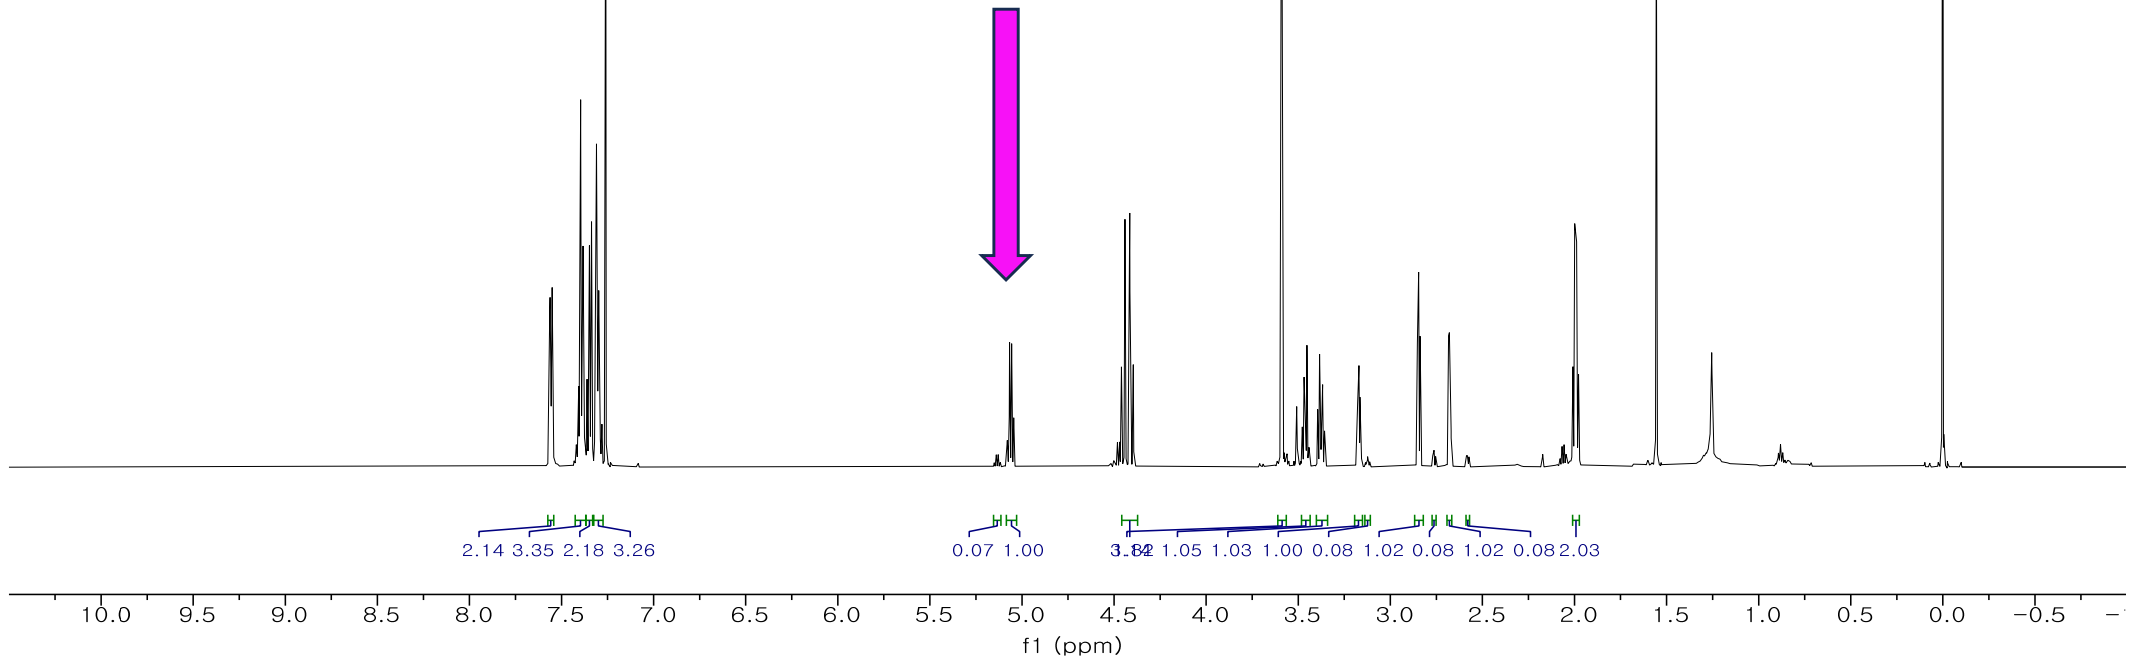

S31

7.5025  
7.5021  
7.5018  
7.5015  
7.4990  
7.4982  
7.4980  
7.4984  
7.4980  
7.4065  
7.4034  
7.4011  
7.3997  
7.3964  
7.3914  
7.3886  
7.3830  
7.3797  
7.3768  
7.3739  
7.3620  
7.3599  
7.3572  
7.3497  
7.3477  
7.3458  
7.3395  
7.3356  
7.3216  
7.3187  
7.3145  
7.3101  
7.3062  
7.3005  
7.2958  
7.2919  
7.2873  
7.2830  
7.2802  
7.2773  
5.1509  
5.1399  
5.1289  
5.1180  
5.0675  
5.0562  
4.5019  
4.4822  
4.4697  
4.4601  
4.4500  
4.4406  
4.4151  
3.5918  
3.5898  
3.5867  
3.5770  
3.5706  
3.5673  
3.5610  
3.5514  
3.5232  
3.5123  
3.5096  
3.5075  
3.5054  
3.5020  
3.4966  
3.4861  
3.4626  
3.3843  
3.1344  
3.1301  
3.1276  
3.1234  
3.1193  
3.1167  
3.1125  
2.8534  
2.8459  
2.8385  
2.7697  
2.7622  
2.7547  
2.6836  
2.6794  
2.6756  
2.5862  
2.5819  
2.5781  
2.5738  
2.1725  
2.0777  
2.0677  
2.0664  
2.0568  
2.0465  
1.9885  
1.9883  
1.2579  
1.2551  
0.8927  
0.8813  
0.8693  
0.0063  
0.0009  
-0.0047

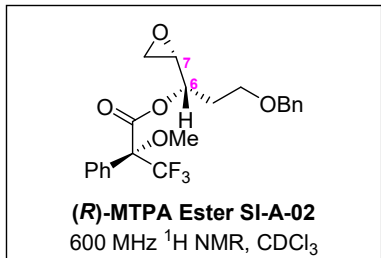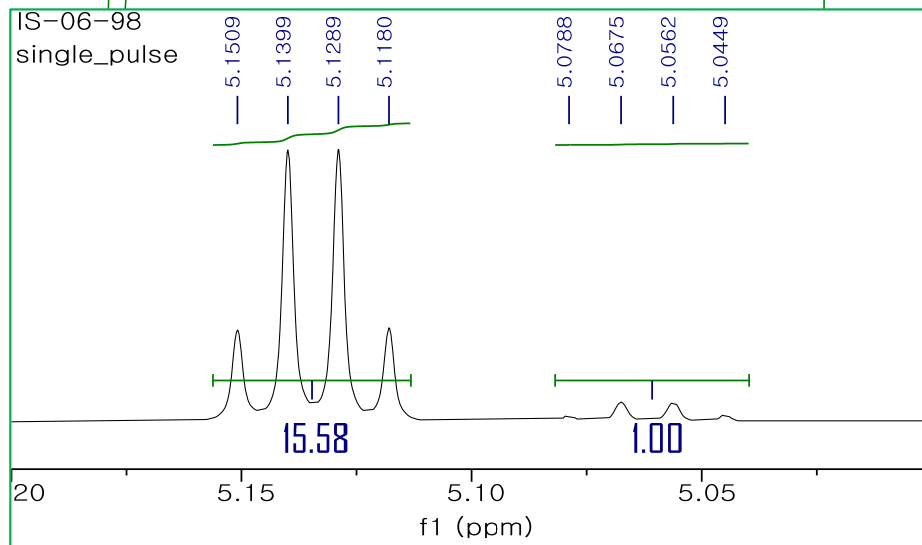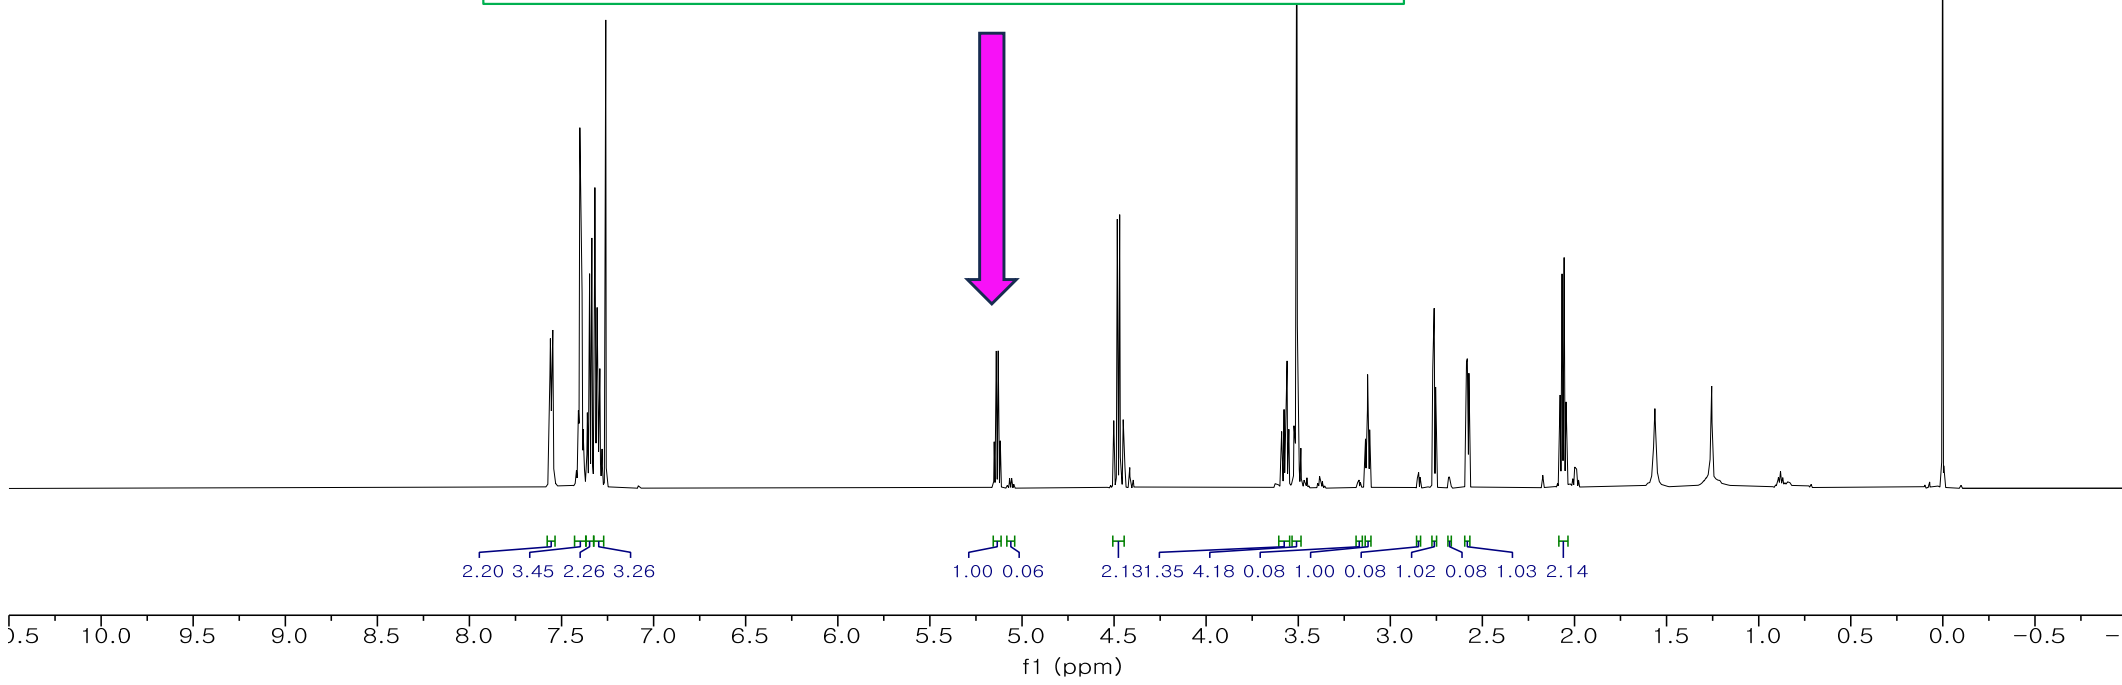





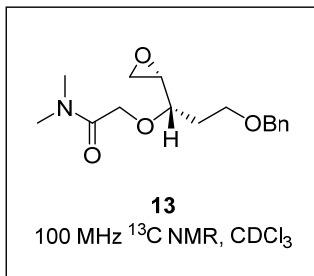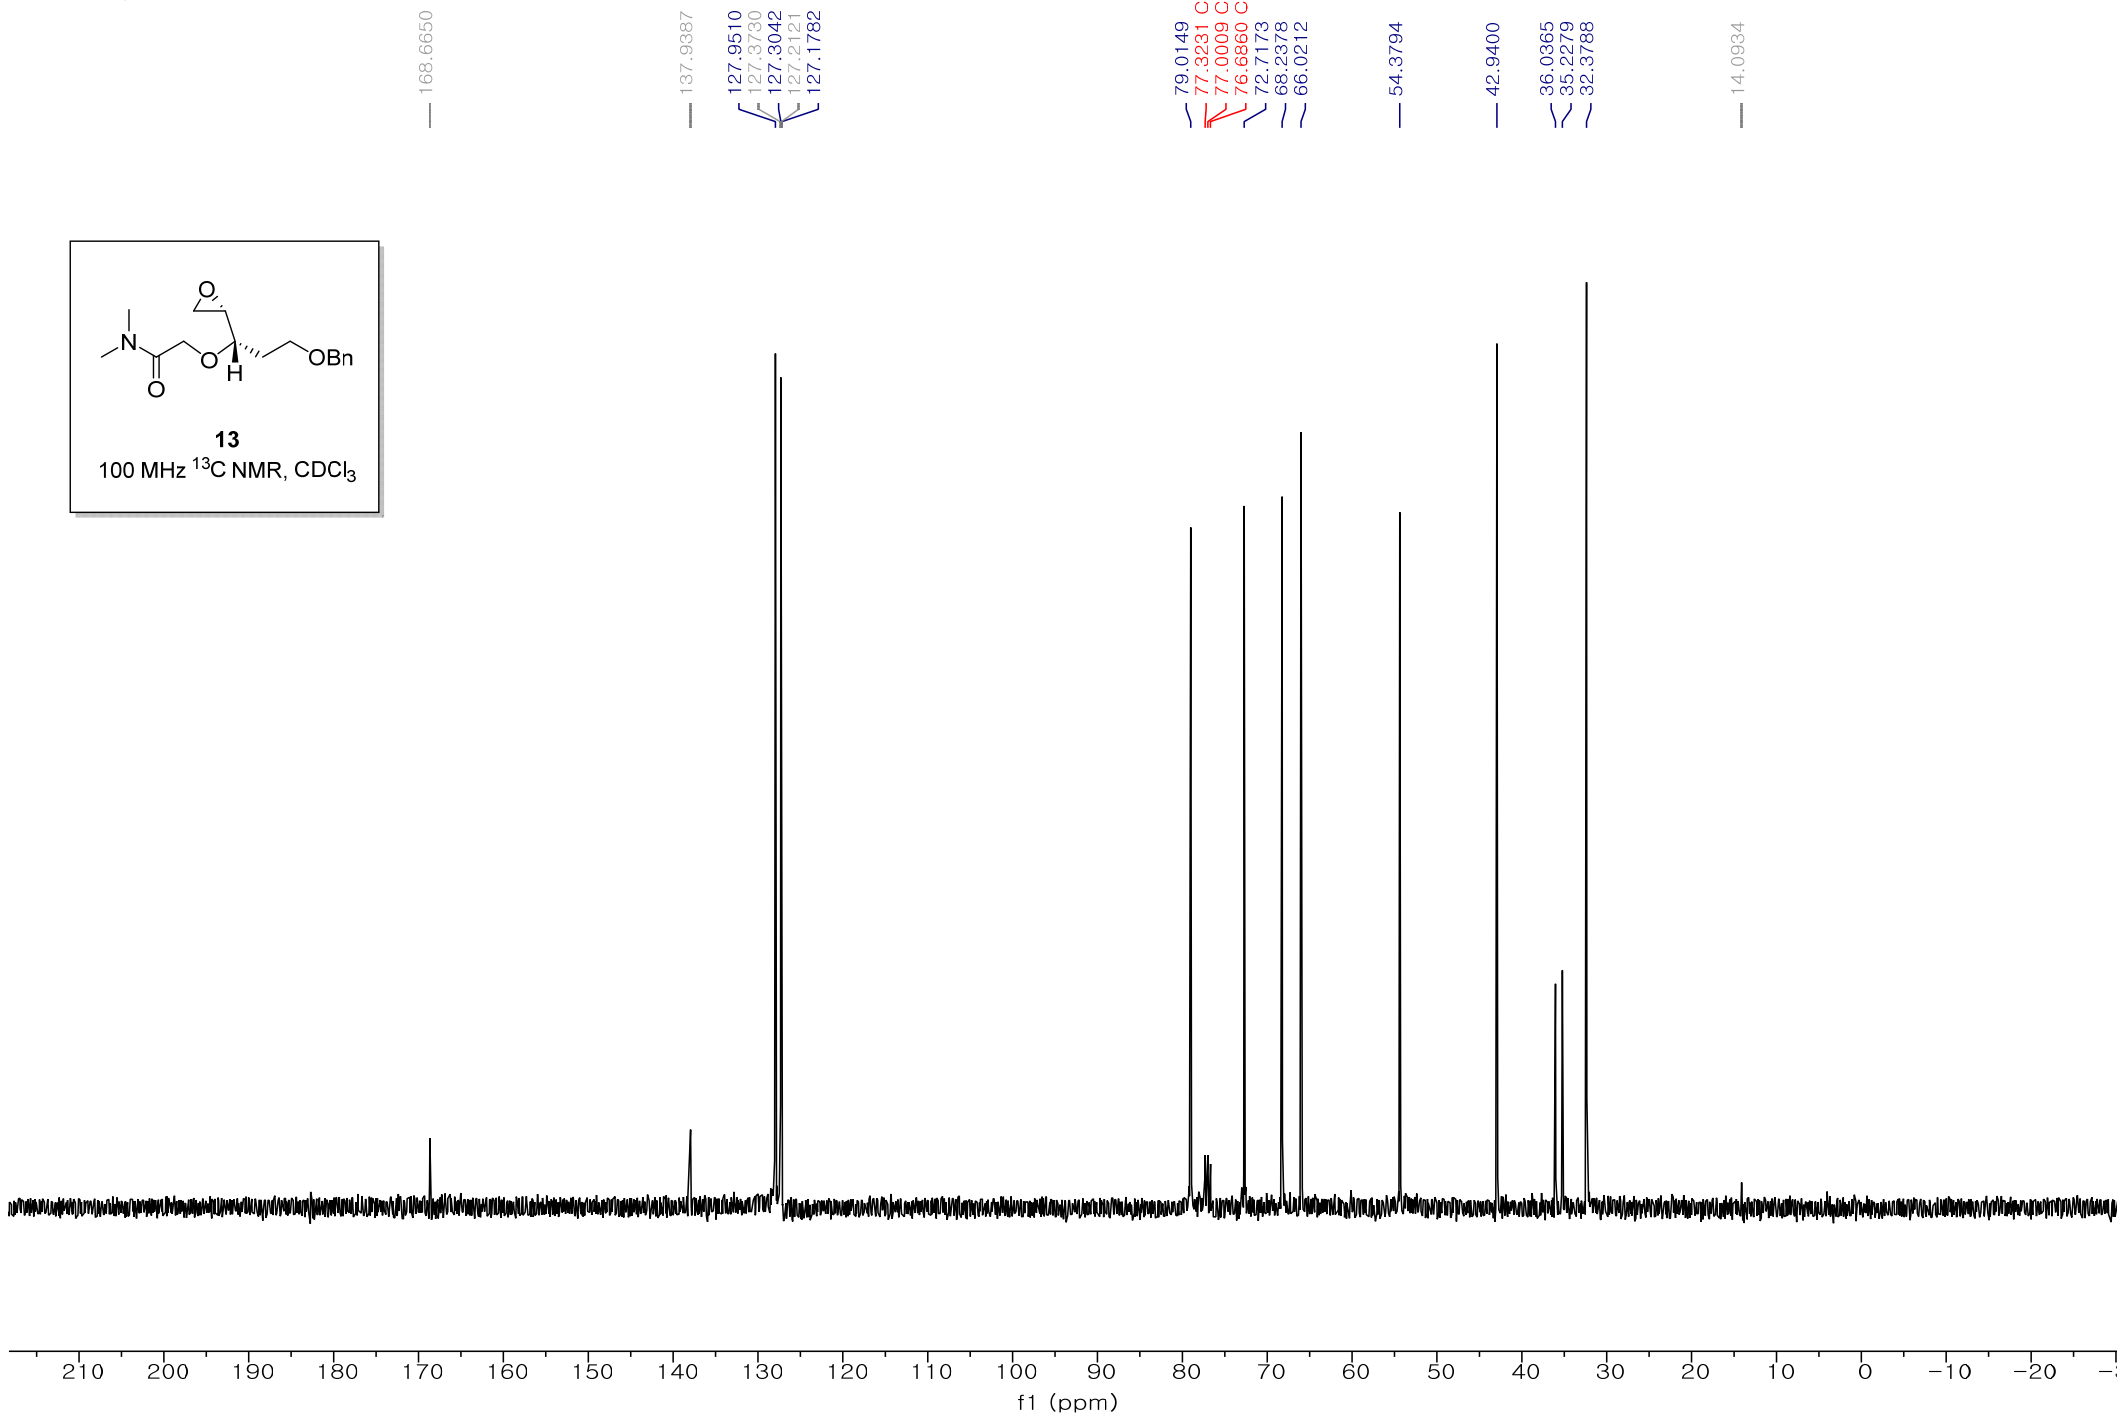

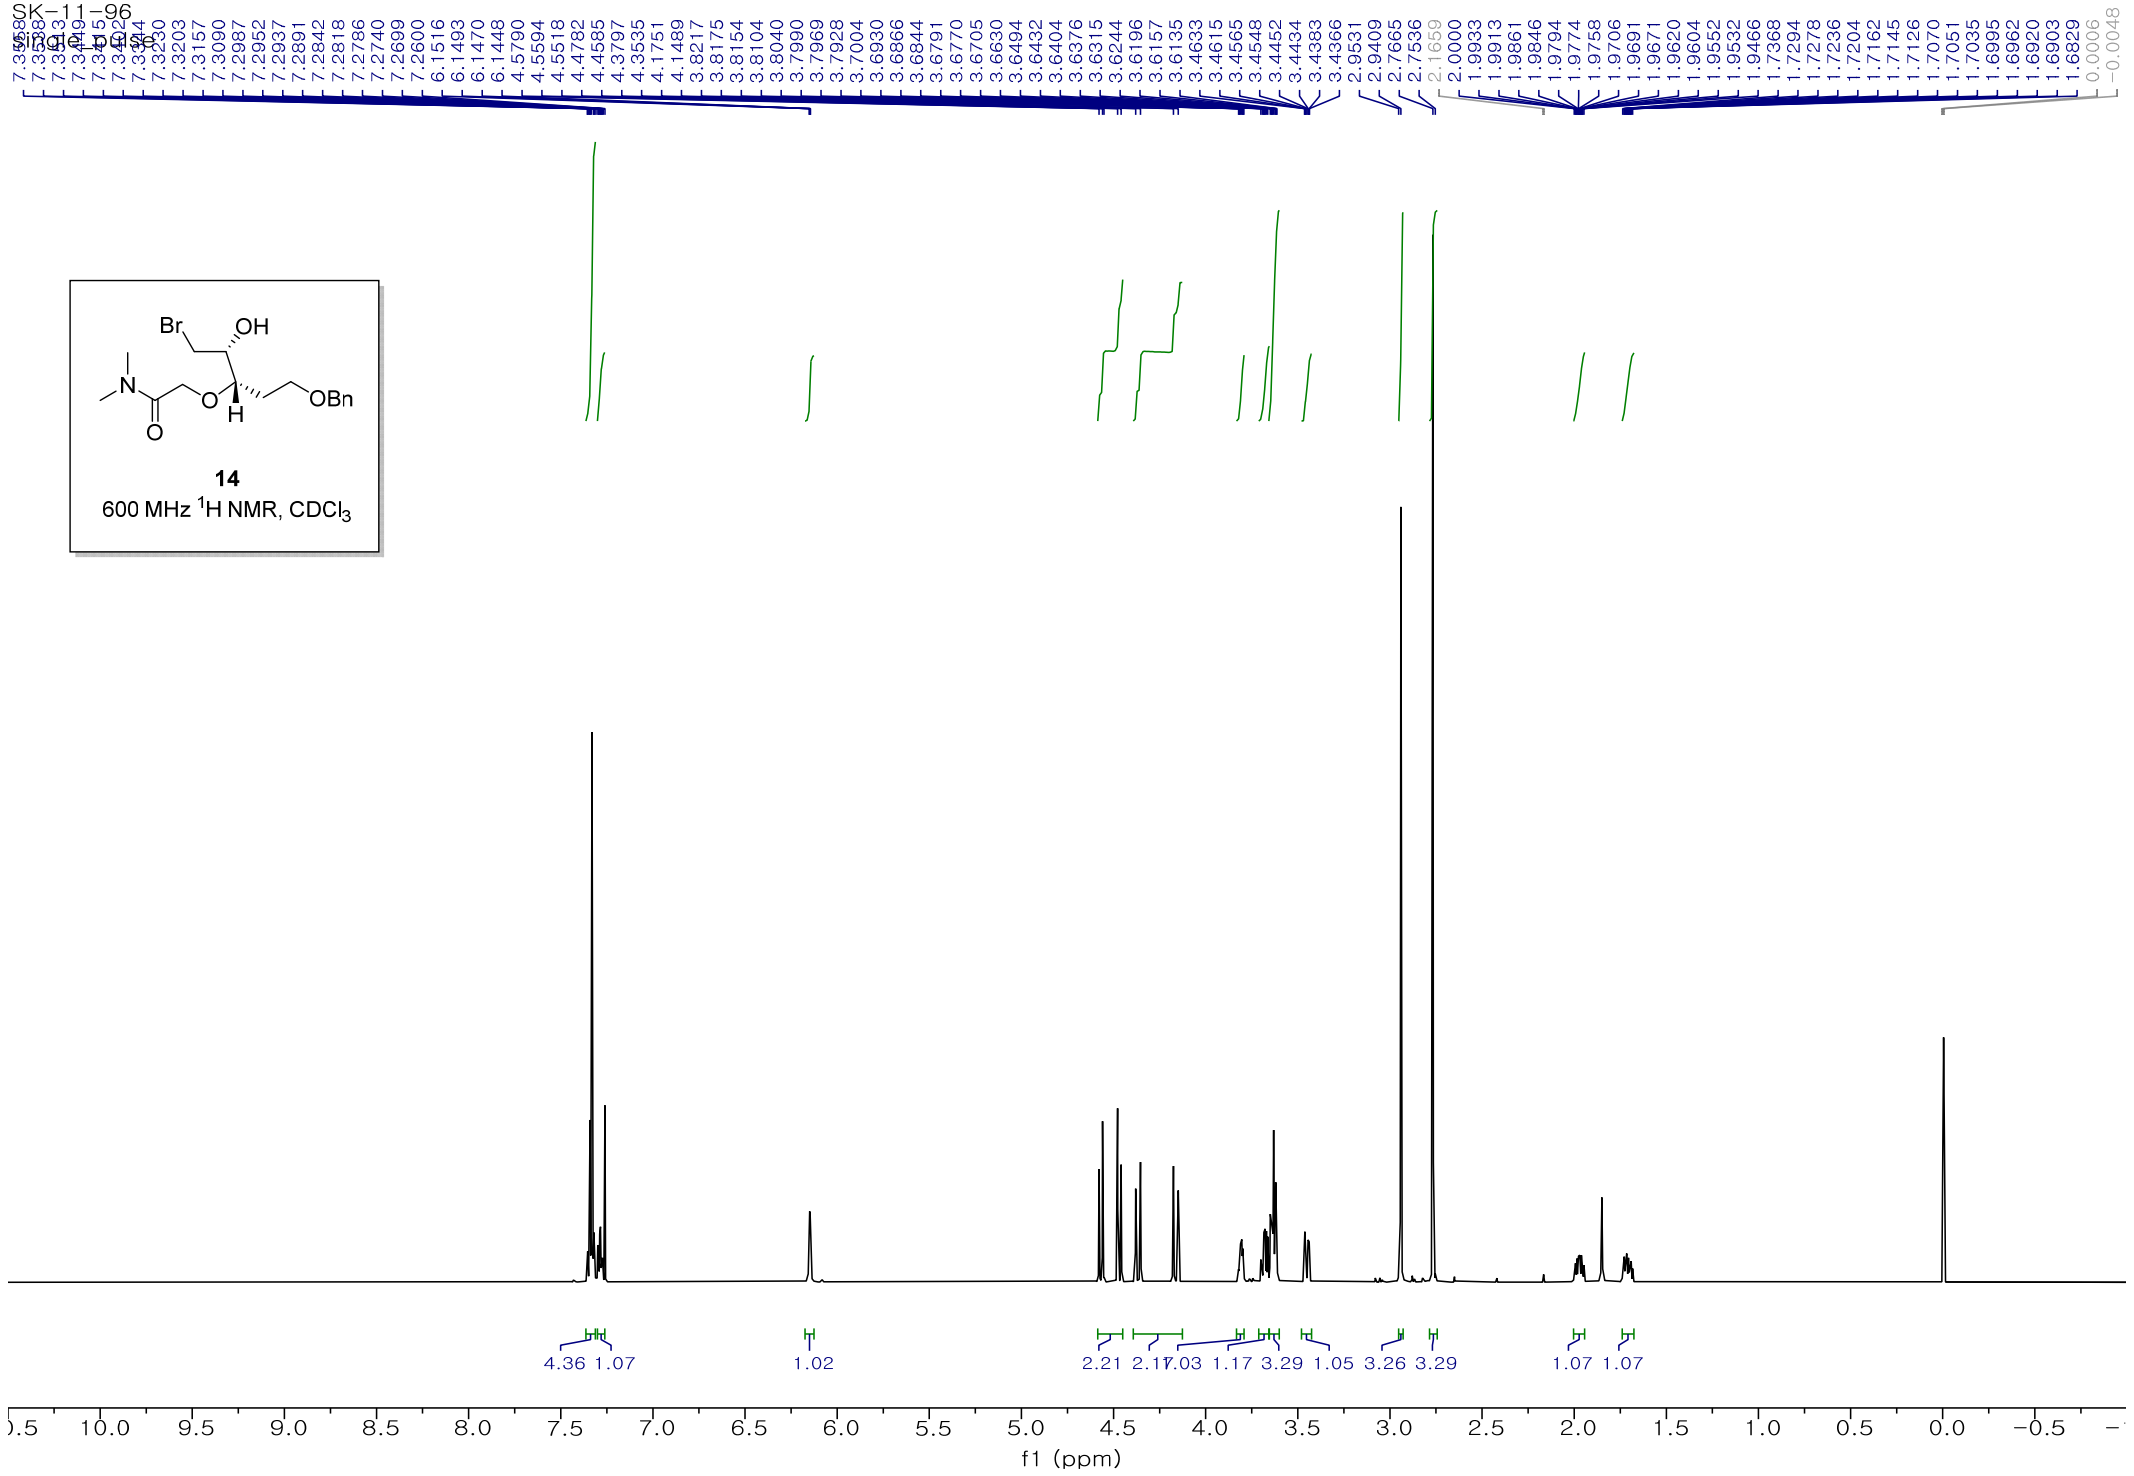

SK-11-96  
single pulse decoupled gated NOE

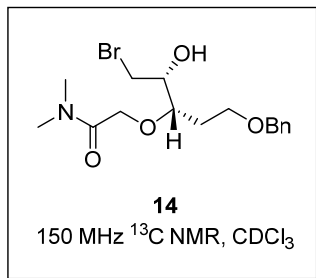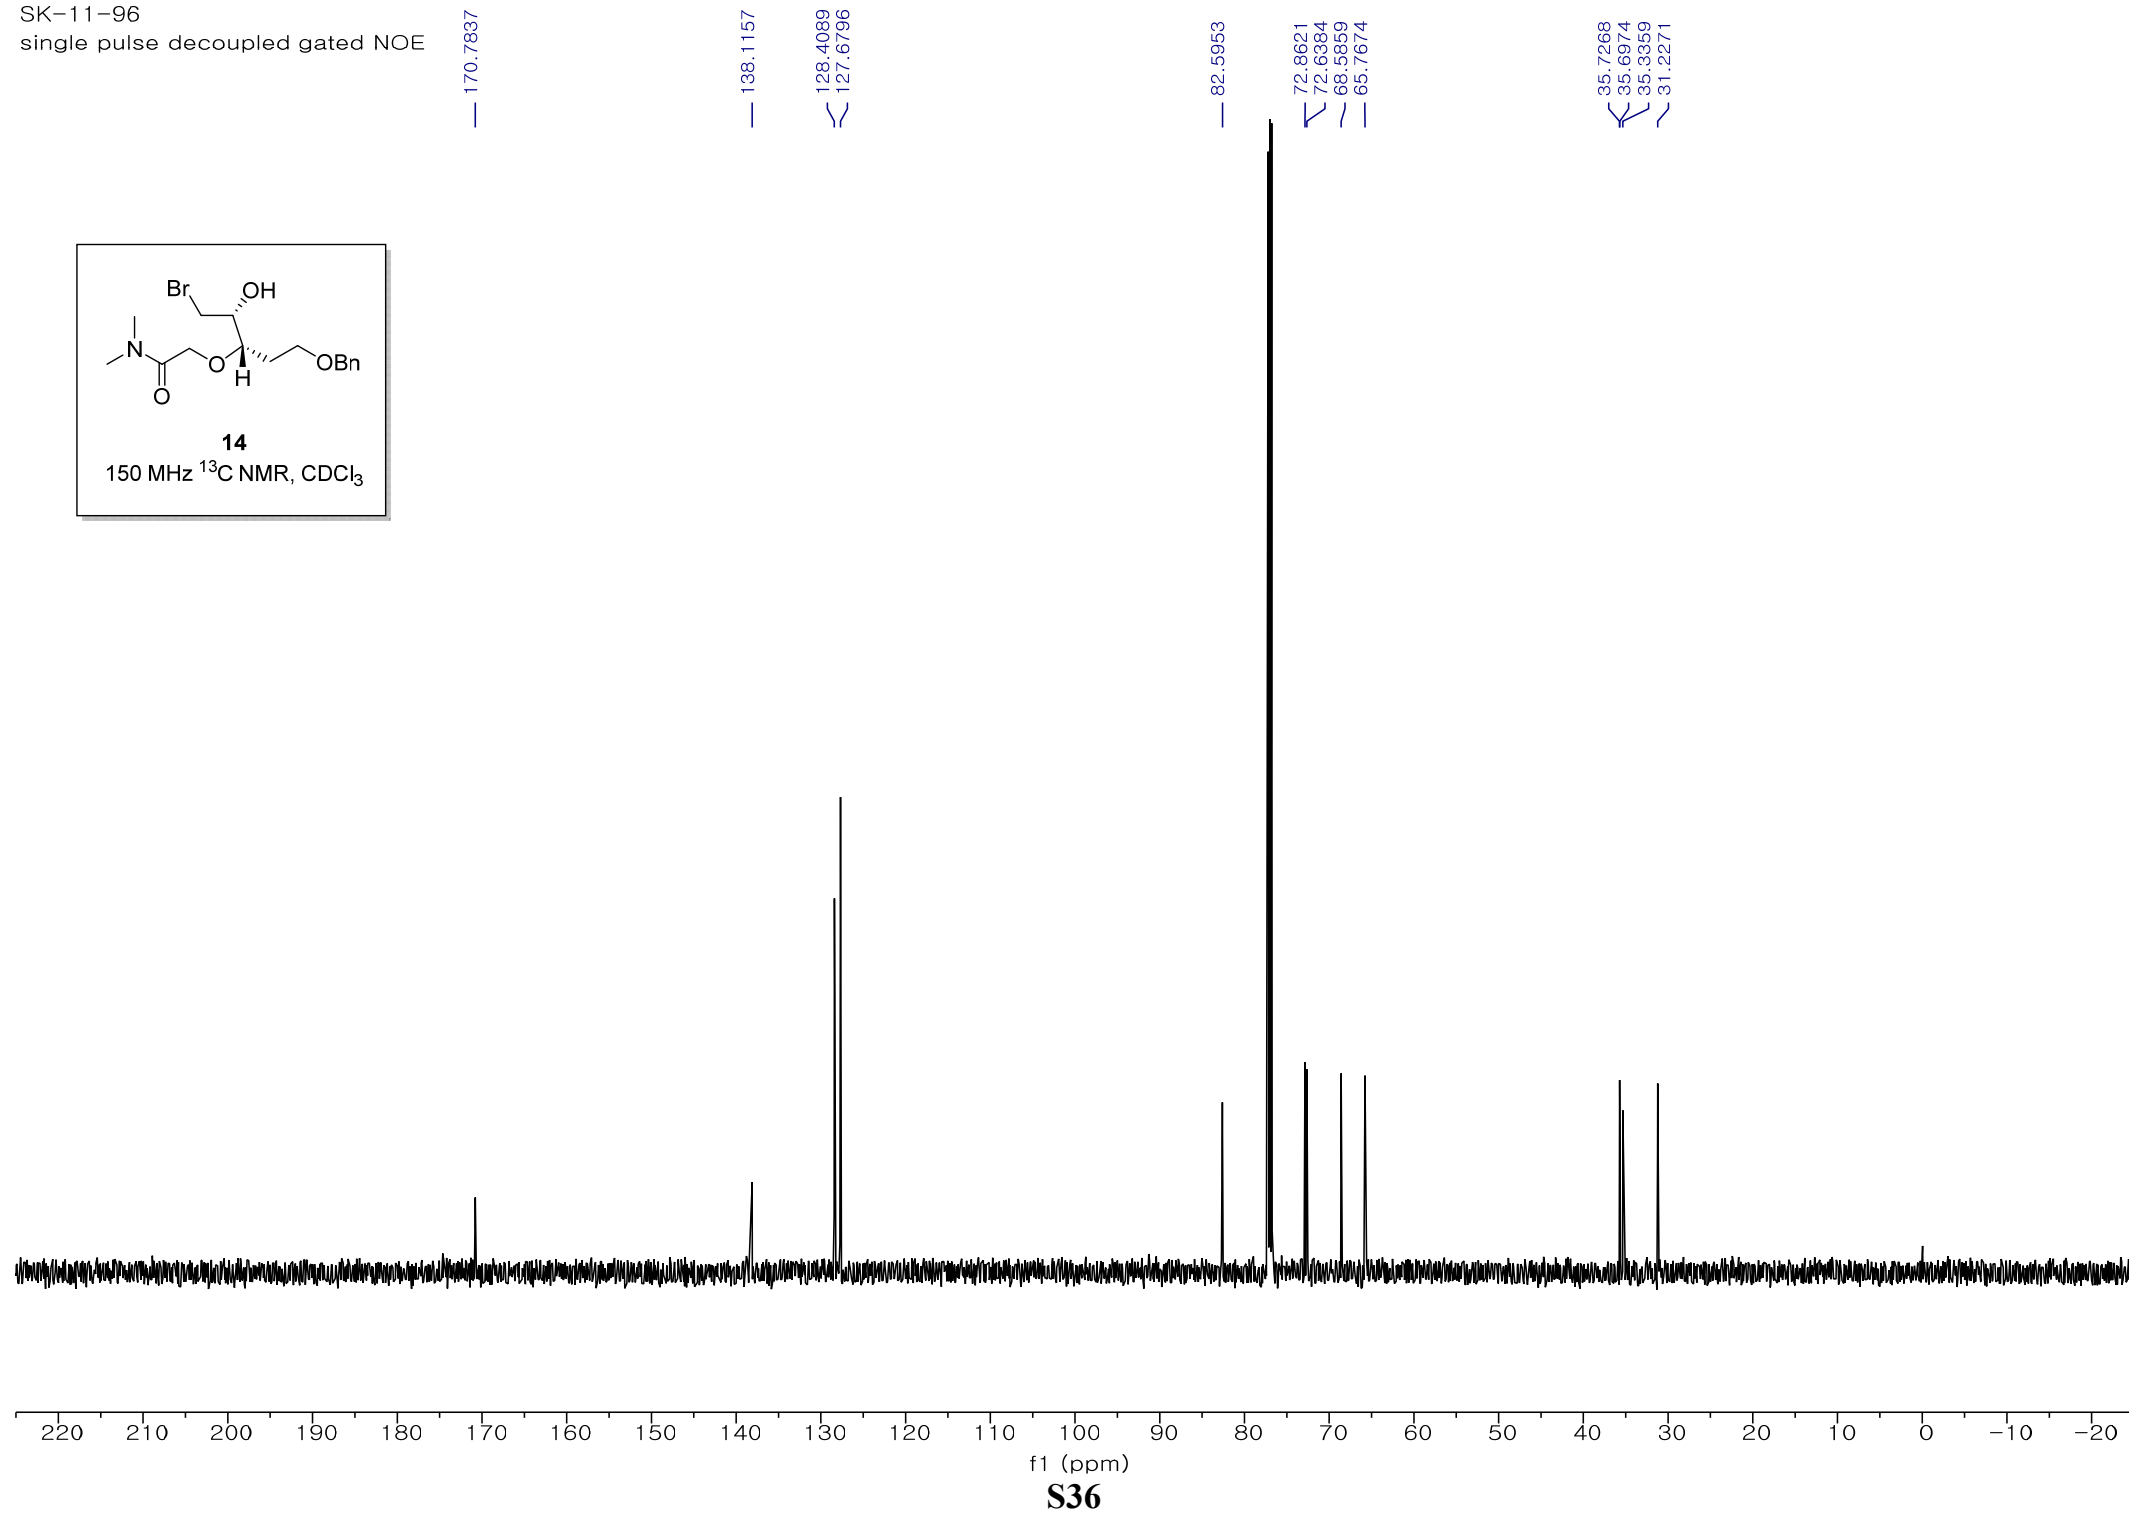

Is-5-63-product-1H

Is-5-63-product

7.3508  
7.3477  
7.3459  
7.3336  
7.3296  
7.3278  
7.3261  
7.3248  
7.3135  
7.3110  
7.2963  
7.2913  
7.2865  
7.2823  
7.2793  
7.2711  
7.2655  
7.2554  
7.2532  
7.2520  
7.2493  
7.2424  
7.2373  
6.8541  
6.8475  
6.8460  
6.8416  
6.8307  
6.8254  
6.8240  
6.8178  
4.6521  
4.6242  
4.5316  
4.5038  
4.4583  
4.4495  
4.2224  
4.1882  
4.1758  
4.1417  
3.8205  
3.8089  
3.8012  
3.7973  
3.7907  
3.7885  
3.7838  
3.7822  
3.7770  
3.7725  
3.7655  
3.7614  
3.7501  
3.6817  
3.6706  
3.6549  
3.6443  
3.5862  
3.5730  
3.5672  
3.5627  
3.5539  
3.5495  
3.5436  
3.5366  
3.5302  
3.5222  
3.5134  
3.5078  
3.4987  
3.4843  
3.4456  
3.4306  
3.4190  
3.4141  
3.4042  
2.9047  
2.8945  
2.8790  
2.8639  
2.8621  
2.8554  
1.9799  
1.9752  
1.9691  
1.9641  
1.9594  
1.9485  
1.9446  
1.9399  
1.9332  
1.9285  
1.9252  
1.9139  
1.8188  
1.8052  
1.8001  
1.7916  
1.7728  
1.7698  
1.7642  
1.7560  
1.7505  
0.0004  
-0.0009

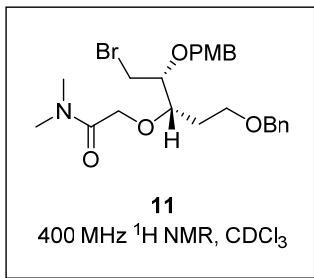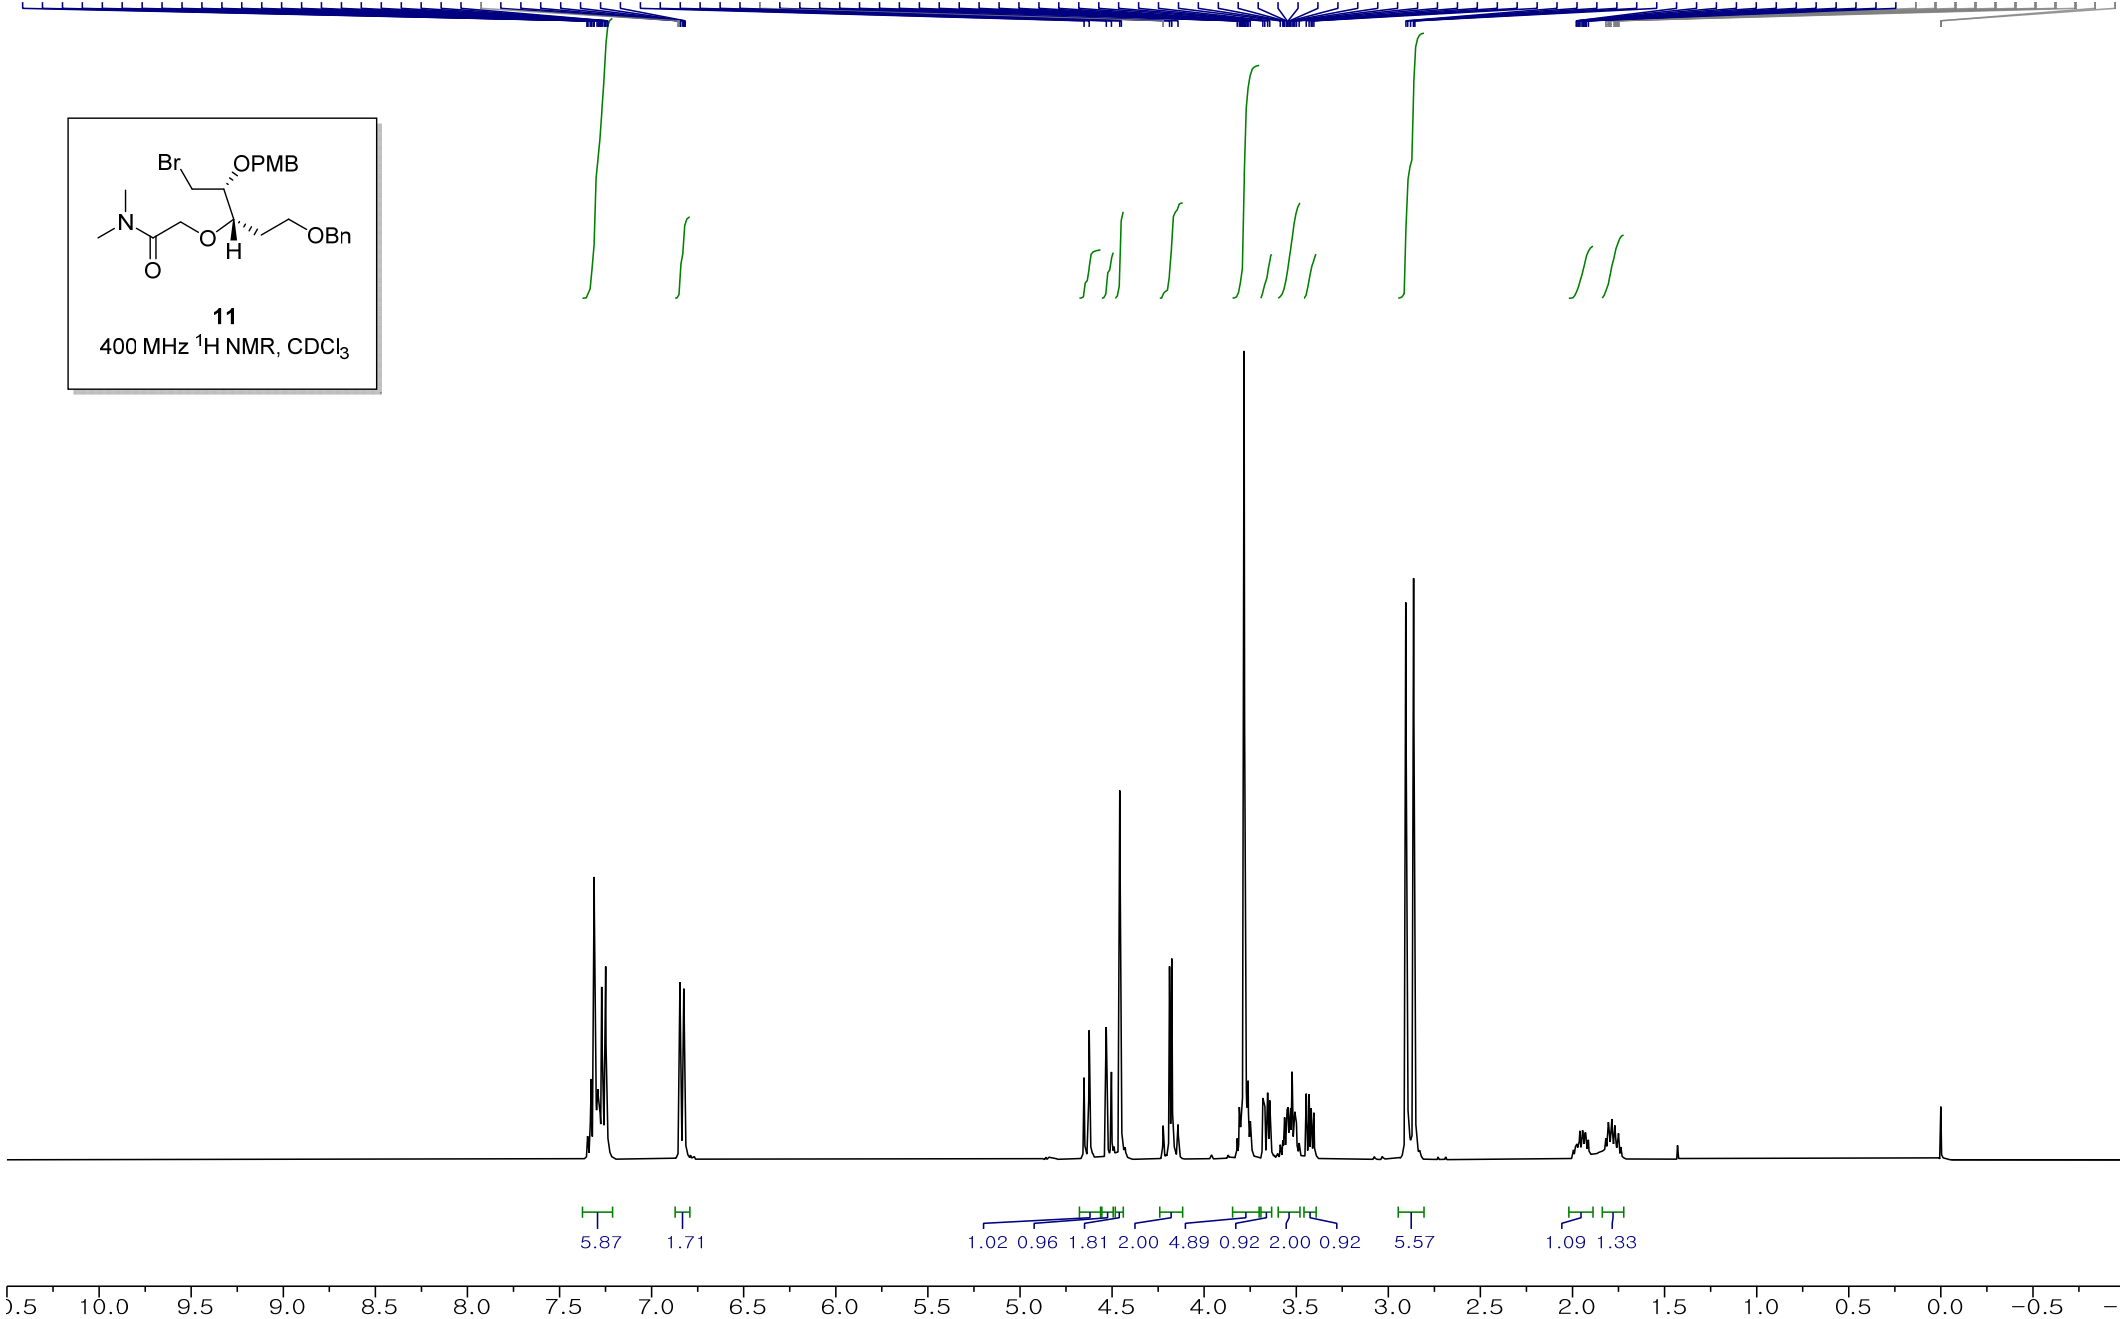

f1 (ppm)

S37

IS-5-63-product-13C  
Is-5-63-product

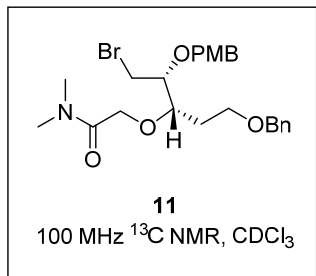

168.5883

158.9195

138.0472

129.6417

129.4590

128.0099

127.3322

127.3158

127.2110

113.4402

79.6224

77.5684

77.3107

76.9944

76.6770

72.6578

72.6390

72.5402

69.5437

66.2796

55.0957

36.1166

35.2584

31.9583

29.8720

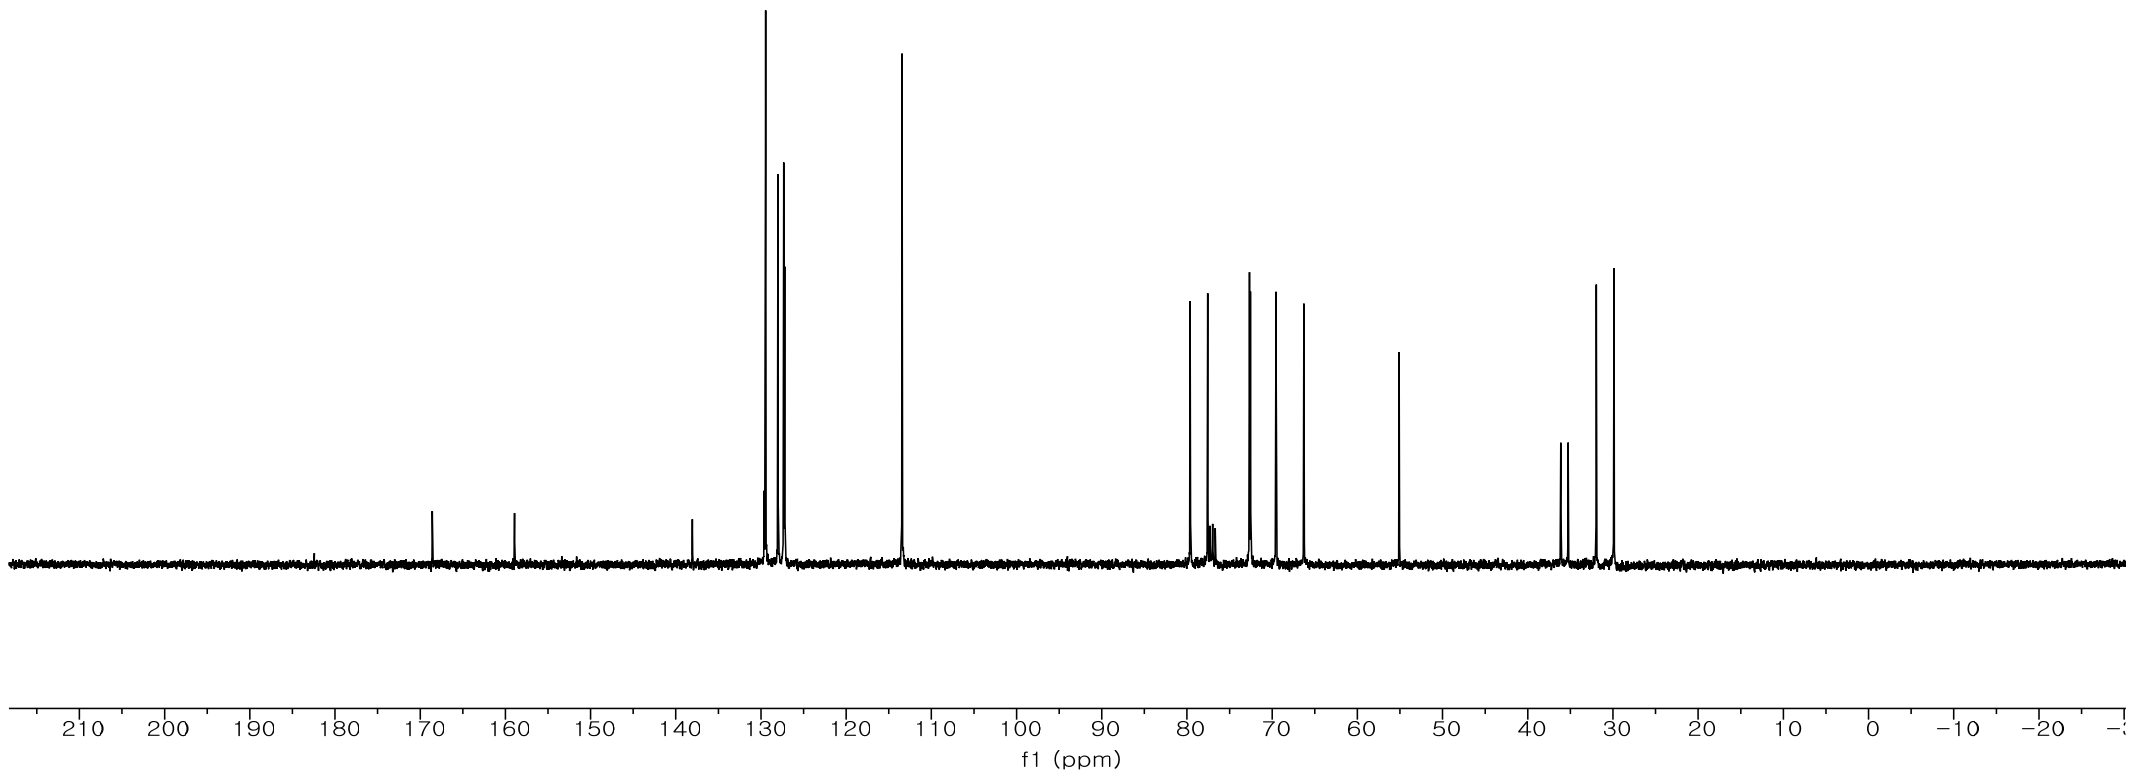

S38

7.34501  
7.33907  
7.33313  
7.32719  
7.32125  
7.31531  
7.30937  
7.30343  
7.29749  
7.29155  
7.28561  
7.27967  
7.27373  
7.26779  
7.26185  
7.25591  
7.25000  
7.24406  
7.23812  
7.23218  
7.22624  
7.22030  
7.21436  
7.20842  
7.20248  
7.19654  
7.19060  
7.18466  
7.17872  
7.17278  
7.16684  
7.16090  
7.15496  
7.14902  
7.14308  
7.13714  
7.13120  
7.12526  
7.11932  
7.11338  
7.10744  
7.10150  
7.09556  
7.08962  
7.08368  
7.07774  
7.07180  
7.06586  
7.05992  
7.05398  
7.04804  
7.04210  
7.03616  
7.03022  
7.02428  
7.01834  
7.01240  
7.00646  
7.00052  
6.99458  
6.98864  
6.98270  
6.97676  
6.97082  
6.96488  
6.95894  
6.95300  
6.94706  
6.94112  
6.93518  
6.92924  
6.92330  
6.91736  
6.91142  
6.90548  
6.89954  
6.89360  
6.88766  
6.88172  
6.87578  
6.86984  
6.86390  
6.85796  
6.85202  
6.84608  
6.84014  
6.83420  
6.82826  
6.82232  
6.81638  
6.81044  
6.80450  
6.79856  
6.79262  
6.78668  
6.78074  
6.77480  
6.76886  
6.76292  
6.75698  
6.75104  
6.74510  
6.73916  
6.73322  
6.72728  
6.72134  
6.71540  
6.70946  
6.70352  
6.69758  
6.69164  
6.68570  
6.67976  
6.67382  
6.66788  
6.66194  
6.65600  
6.65006  
6.64412  
6.63818  
6.63224  
6.62630  
6.62036  
6.61442  
6.60848  
6.60254  
6.59660  
6.59066  
6.58472  
6.57878  
6.57284  
6.56690  
6.56096  
6.55502  
6.54908  
6.54314  
6.53720  
6.53126  
6.52532  
6.51938  
6.51344  
6.50750  
6.50156  
6.49562  
6.48968  
6.48374  
6.47780  
6.47186  
6.46592  
6.45998  
6.45404  
6.44810  
6.44216  
6.43622  
6.43028  
6.42434  
6.41840  
6.41246  
6.40652  
6.40058  
6.39464  
6.38870  
6.38276  
6.37682  
6.37088  
6.36494  
6.35900  
6.35306  
6.34712  
6.34118  
6.33524  
6.32930  
6.32336  
6.31742  
6.31148  
6.30554  
6.29960  
6.29366  
6.28772  
6.28178  
6.27584  
6.26990  
6.26396  
6.25802  
6.25208  
6.24614  
6.24020  
6.23426  
6.22832  
6.22238  
6.21644  
6.21050  
6.20456  
6.19862  
6.19268  
6.18674  
6.18080  
6.17486  
6.16892  
6.16298  
6.15704  
6.15110  
6.14516  
6.13922  
6.13328  
6.12734  
6.12140  
6.11546  
6.10952  
6.10358  
6.09764  
6.09170  
6.08576  
6.07982  
6.07388  
6.06794  
6.06200  
6.05606  
6.05012  
6.04418  
6.03824  
6.03230  
6.02636  
6.02042  
6.01448  
6.00854  
6.00260  
5.99666  
5.99072  
5.98478  
5.97884  
5.97290  
5.96696  
5.96102  
5.95508  
5.94914  
5.94320  
5.93726  
5.93132  
5.92538  
5.91944  
5.91350  
5.90756  
5.90162  
5.89568  
5.88974  
5.88380  
5.87786  
5.87192  
5.86598  
5.86004  
5.85410  
5.84816  
5.84222  
5.83628  
5.83034  
5.82440  
5.81846  
5.81252  
5.80658  
5.80064  
5.79470  
5.78876  
5.78282  
5.77688  
5.77094  
5.76500  
5.75906  
5.75312  
5.74718  
5.74124  
5.73530  
5.72936  
5.72342  
5.71748  
5.71154  
5.70560  
5.69966  
5.69372  
5.68778  
5.68184  
5.67590  
5.66996  
5.66402  
5.65808  
5.65214  
5.64620  
5.64026  
5.63432  
5.62838  
5.62244  
5.61650  
5.61056  
5.60462  
5.59868  
5.59274  
5.58680  
5.58086  
5.57492  
5.56898  
5.56304  
5.55710  
5.55116  
5.54522  
5.53928  
5.53334  
5.52740  
5.52146  
5.51552  
5.50958  
5.50364  
5.49770  
5.49176  
5.48582  
5.47988  
5.47394  
5.46800  
5.46206  
5.45612  
5.45018  
5.44424  
5.43830  
5.43236  
5.42642  
5.42048  
5.41454  
5.40860  
5.40266  
5.39672  
5.39078  
5.38484  
5.37890  
5.37296  
5.36702  
5.36108  
5.35514  
5.34920  
5.34326  
5.33732  
5.33138  
5.32544  
5.31950  
5.31356  
5.30762  
5.30168  
5.29574  
5.28980  
5.28386  
5.27792  
5.27198  
5.26604  
5.26010  
5.25416  
5.24822  
5.24228  
5.23634  
5.23040  
5.22446  
5.21852  
5.21258  
5.20664  
5.20070  
5.19476  
5.18882  
5.18288  
5.17694  
5.17100  
5.16506  
5.15912  
5.15318  
5.14724  
5.14130  
5.13536  
5.12942  
5.12348  
5.11754  
5.11160  
5.10566  
5.09972  
5.09378  
5.08784  
5.08190  
5.07596  
5.07002  
5.06408  
5.05814  
5.05220  
5.04626  
5.04032  
5.03438  
5.02844  
5.02250  
5.01656  
5.01062  
5.00468  
4.99874  
4.99280  
4.98686  
4.98092  
4.97498  
4.96904  
4.96310  
4.95716  
4.95122  
4.94528  
4.93934  
4.93340  
4.92746  
4.92152  
4.91558  
4.90964  
4.90370  
4.89776  
4.89182  
4.88588  
4.87994  
4.87400  
4.86806  
4.86212  
4.85618  
4.85024  
4.84430  
4.83836  
4.83242  
4.82648  
4.82054  
4.81460  
4.80866  
4.80272  
4.79678  
4.79084  
4.78490  
4.77896  
4.77302  
4.76708  
4.76114  
4.75520  
4.74926  
4.74332  
4.73738  
4.73144  
4.72550  
4.71956  
4.71362  
4.70768  
4.70174  
4.69580  
4.68986  
4.68392  
4.67798  
4.67204  
4.66610  
4.66016  
4.65422  
4.64828  
4.64234  
4.63640  
4.63046  
4.62452  
4.61858  
4.61264  
4.60670  
4.60076  
4.59482  
4.58888  
4.58294  
4.57700  
4.57106  
4.56512  
4.55918  
4.55324  
4.54730  
4.54136  
4.53542  
4.52948  
4.52354  
4.51760  
4.51166  
4.50572  
4.50000

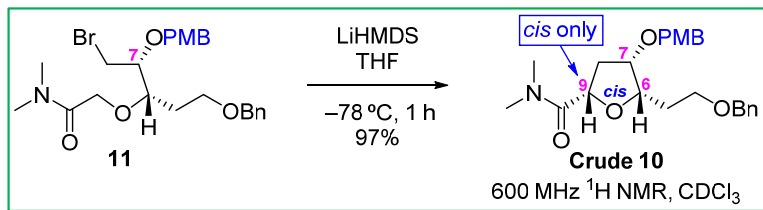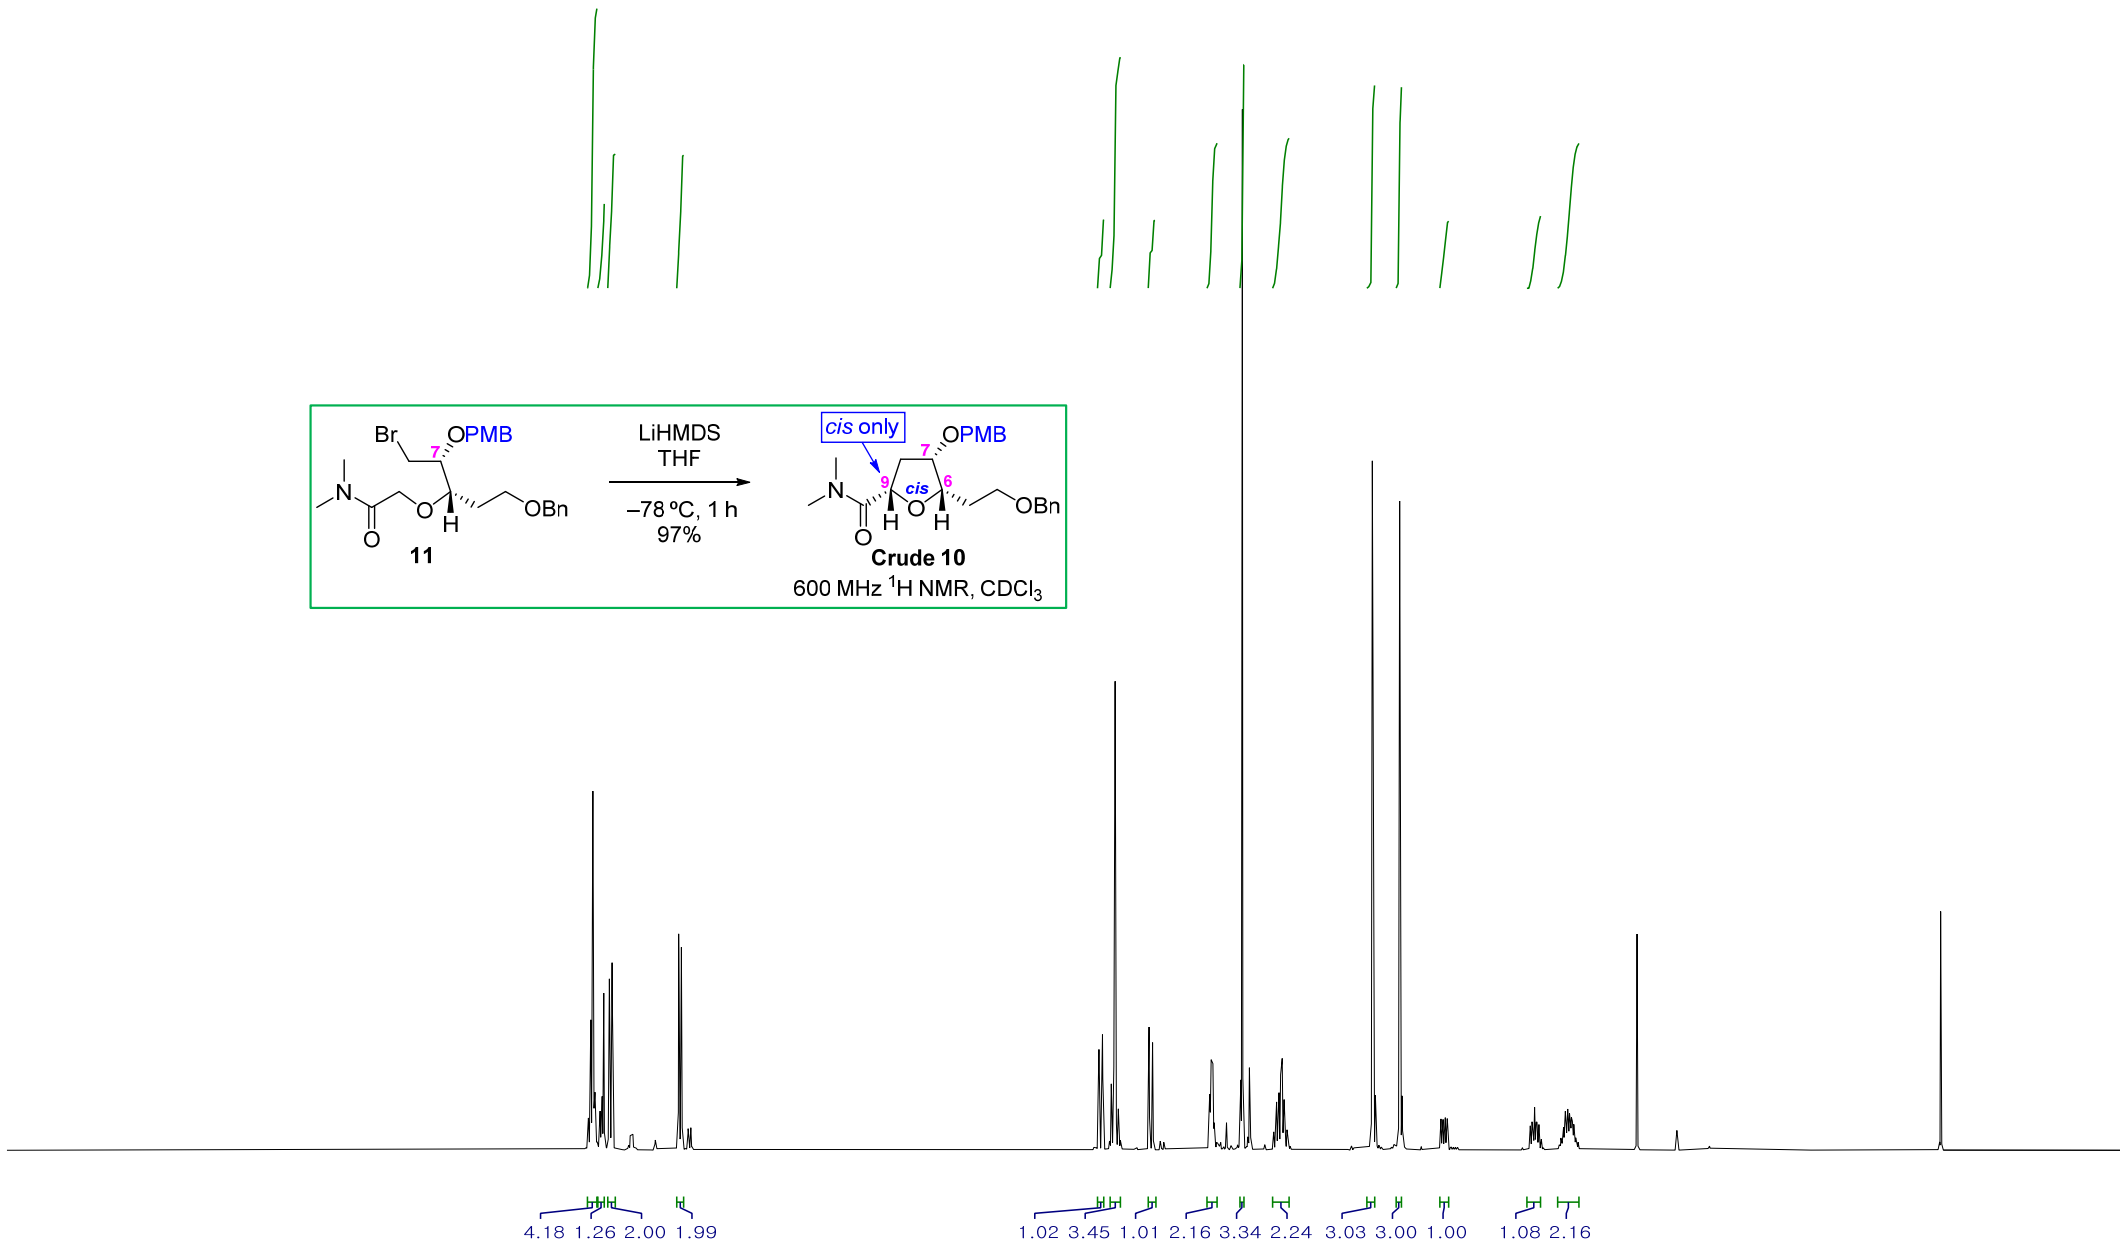

7.5 10.0 9.5 9.0 8.5 8.0 7.5 7.0 6.5 6.0 5.5 5.0 4.5 4.0 3.5 3.0 2.5 2.0 1.5 1.0 0.5 0.0 -0.5 -

f1 (ppm)

S39

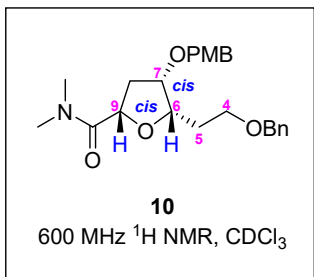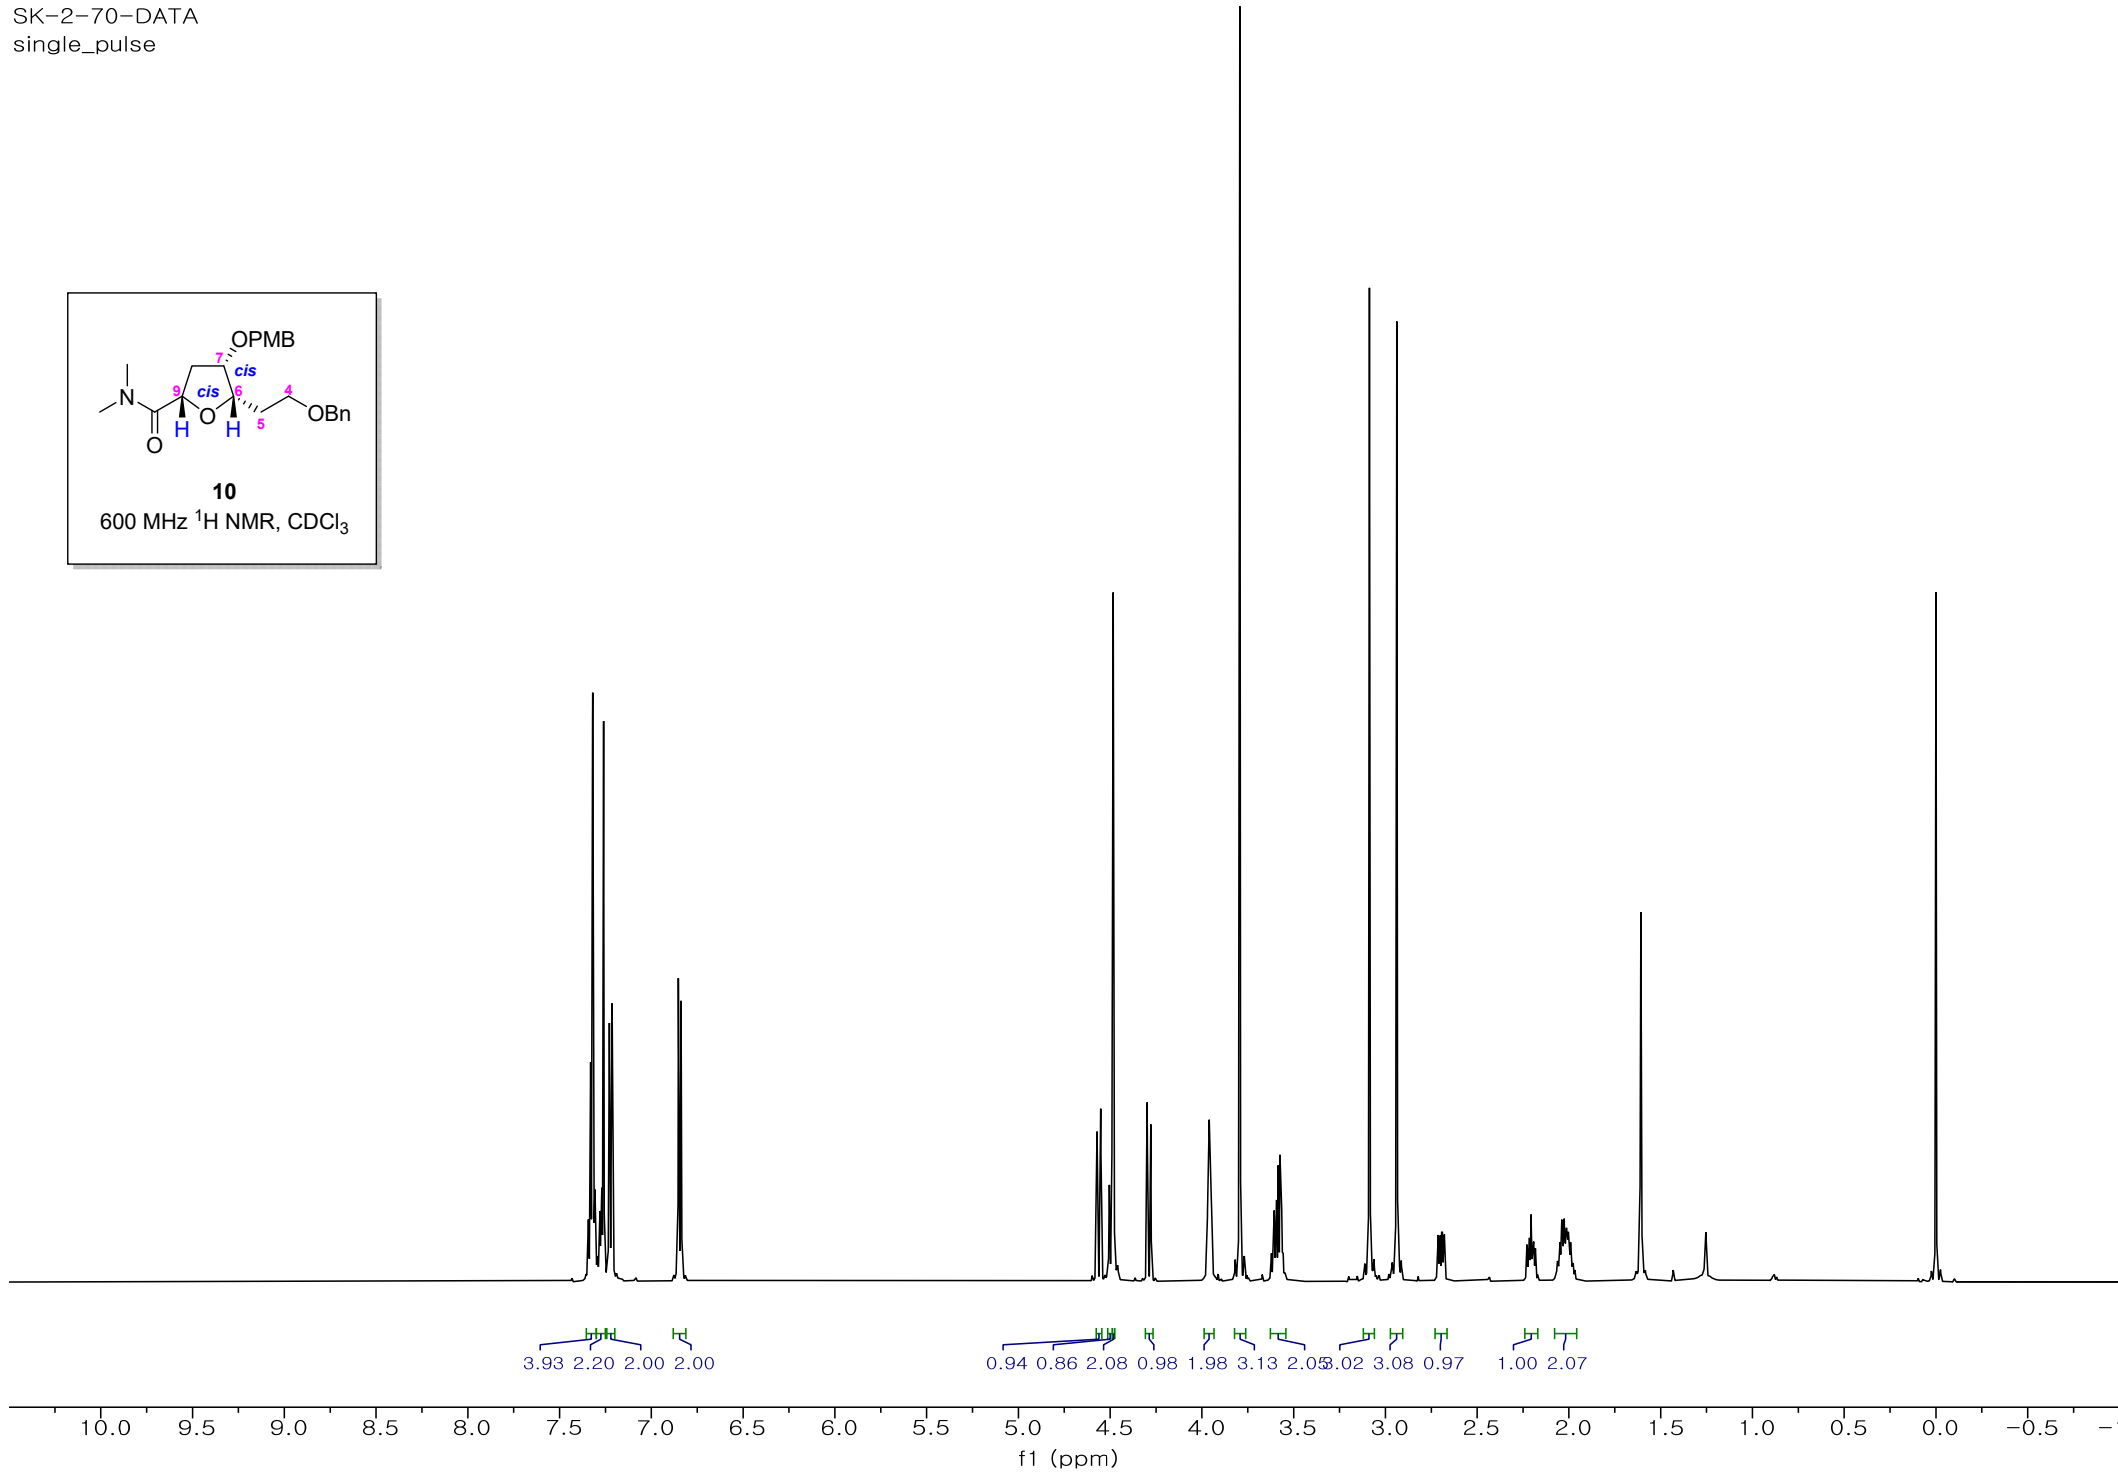



— 169.5391

— 158.7560

— 138.3350

130.1037

129.0933

128.0893

127.3961

127.2663

— 113.4678

80.0908

77.5232

75.8219

72.7903

70.0694

67.3449

— 55.2022

37.1134

36.1084

33.8035

29.2328

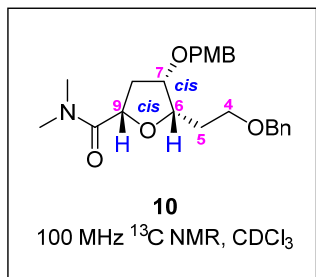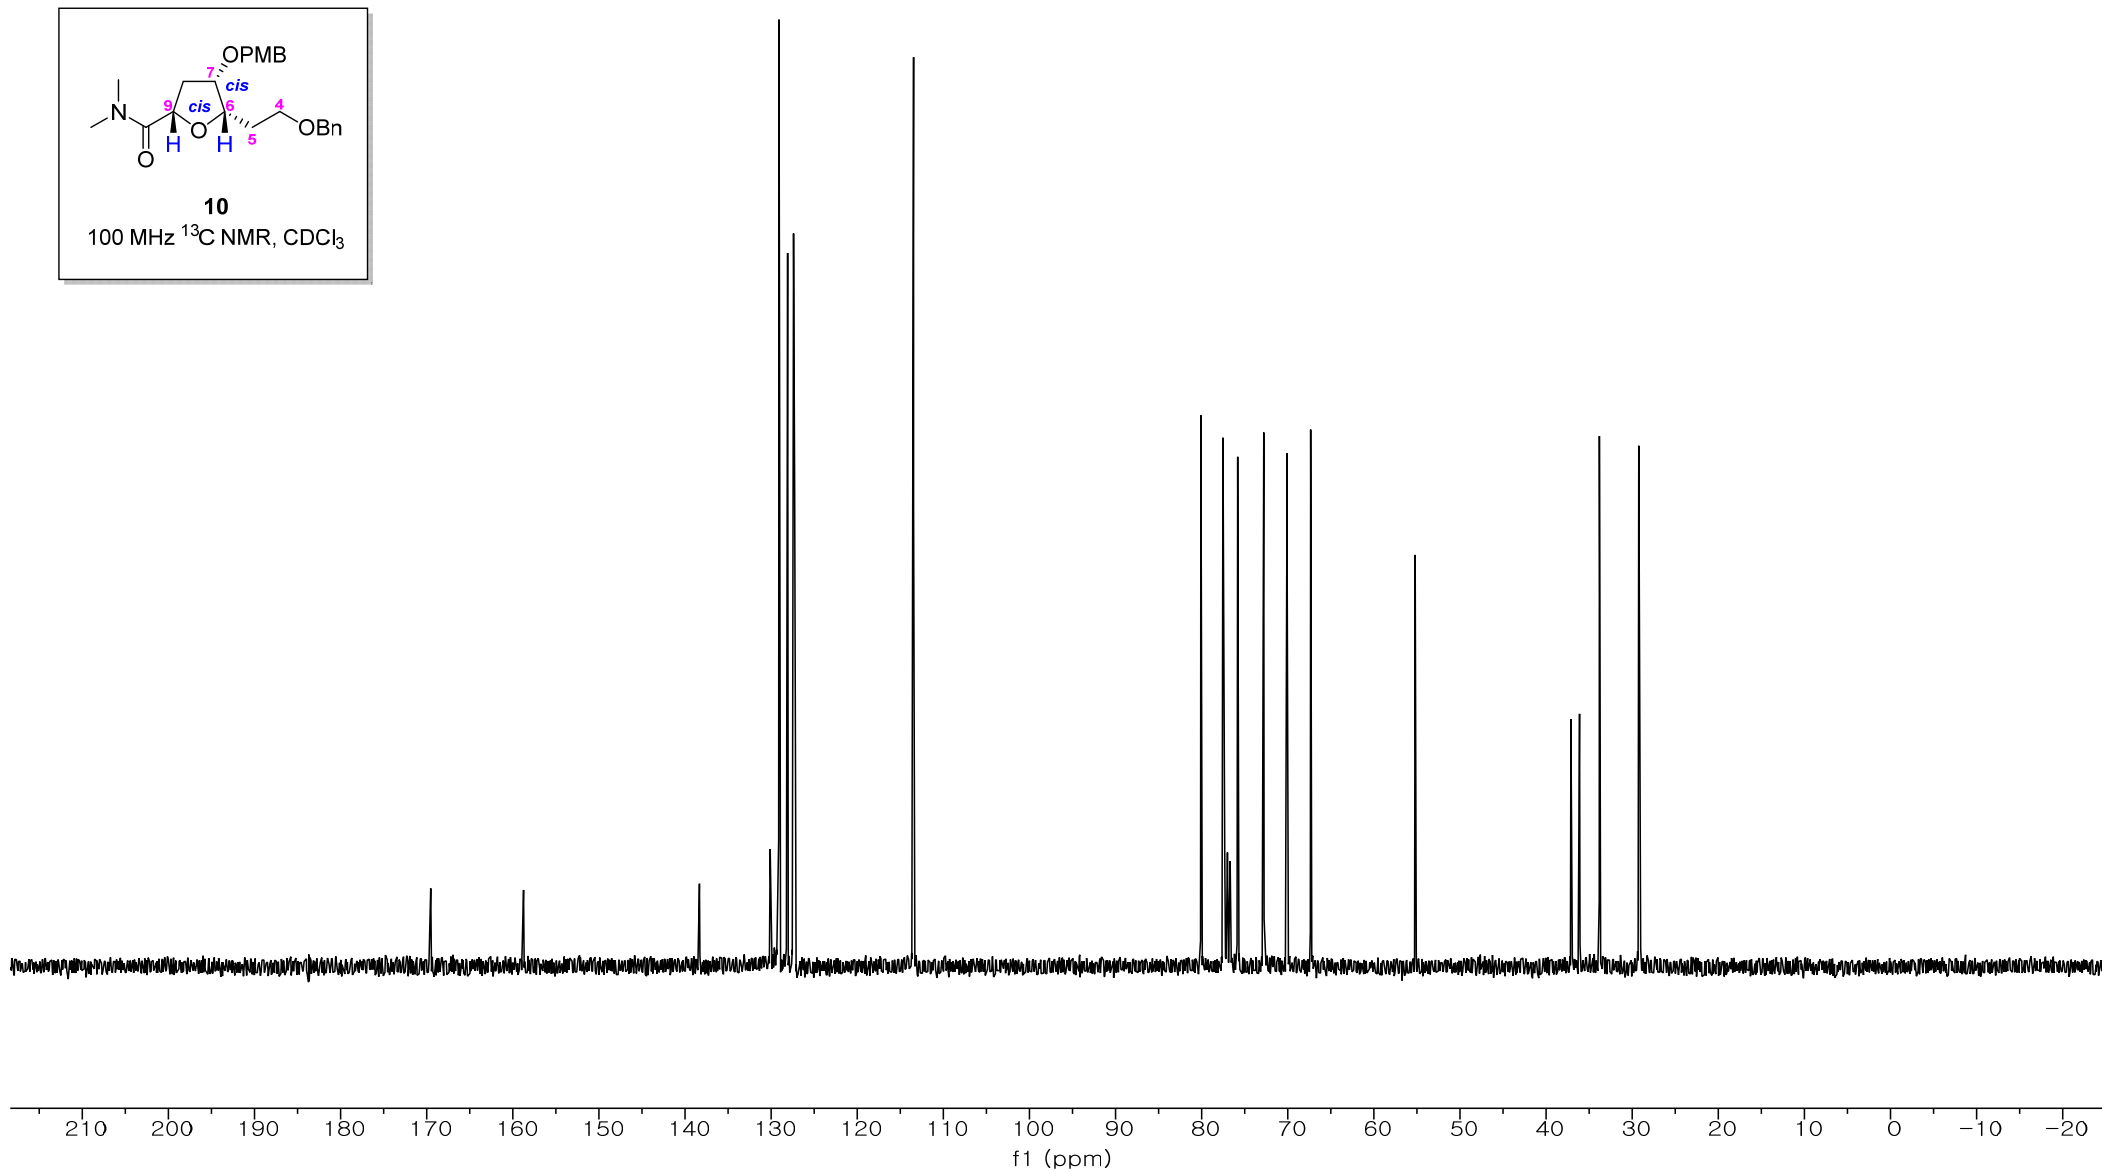

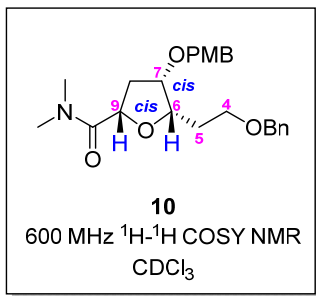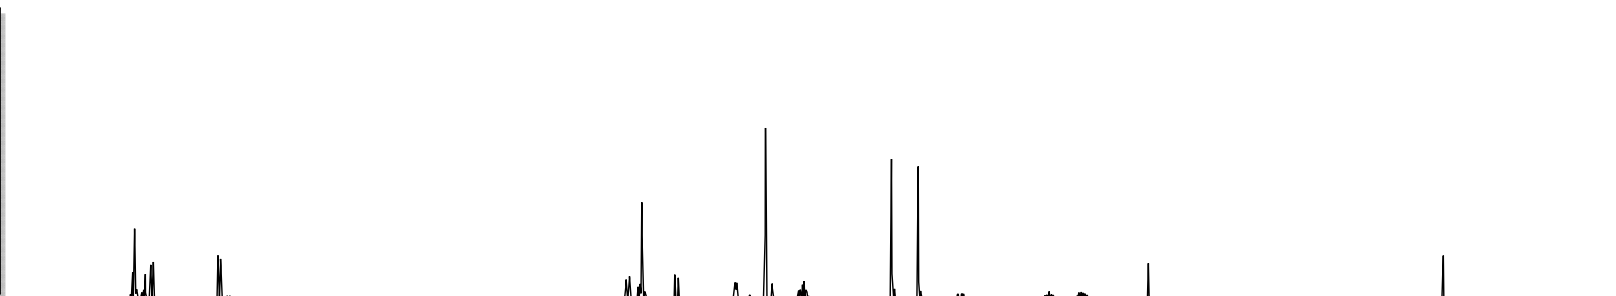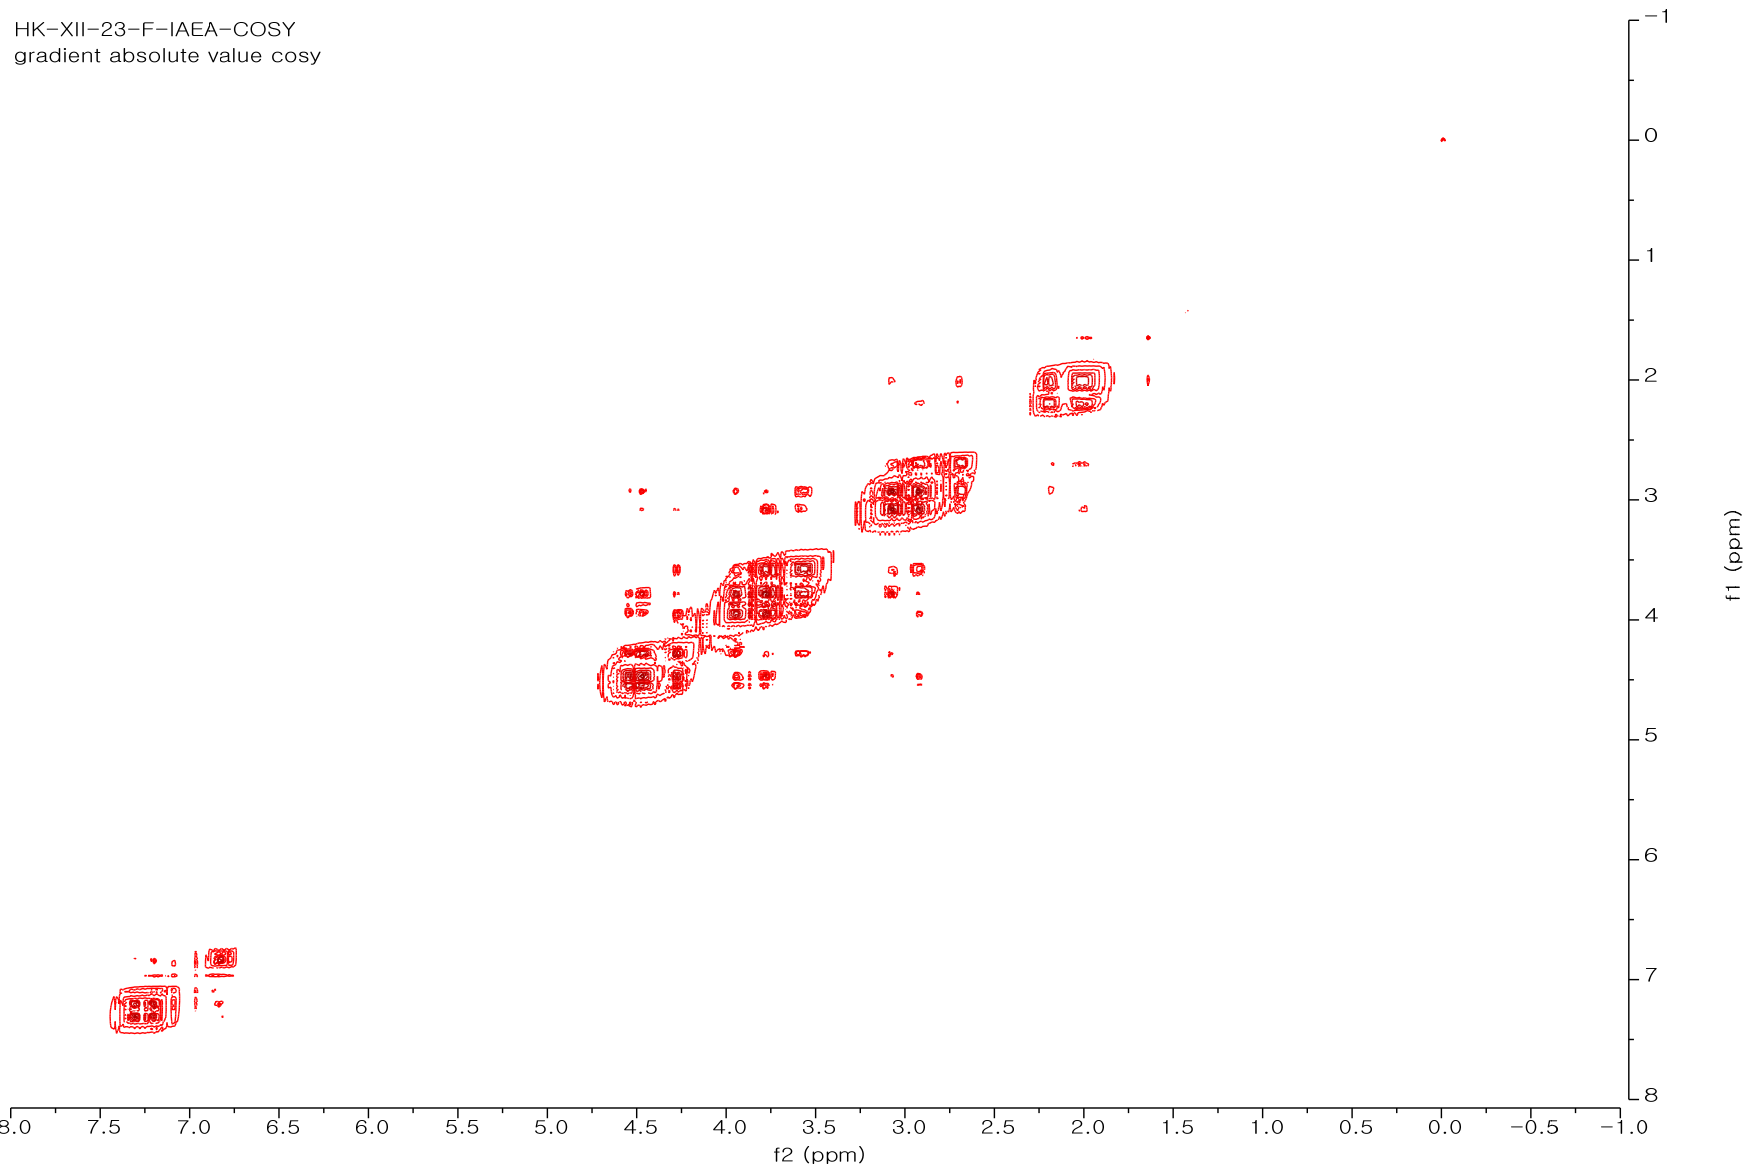

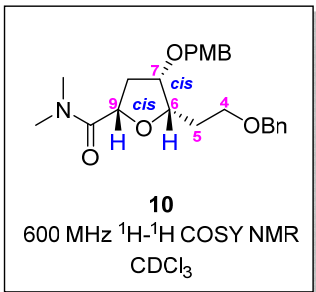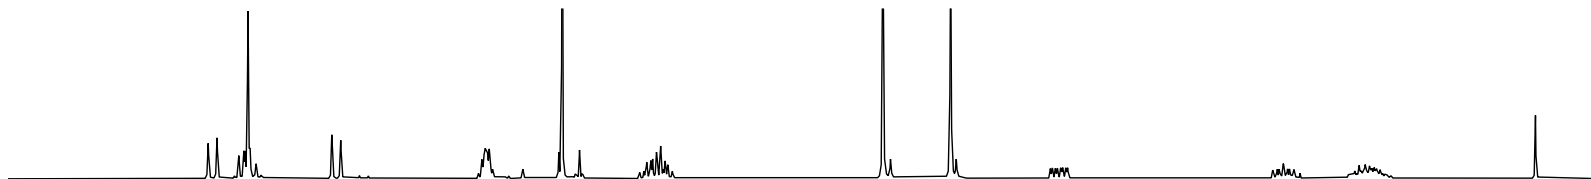

HK-XII-23-F-IAEA-COSY  
 gradient absolute value cosy

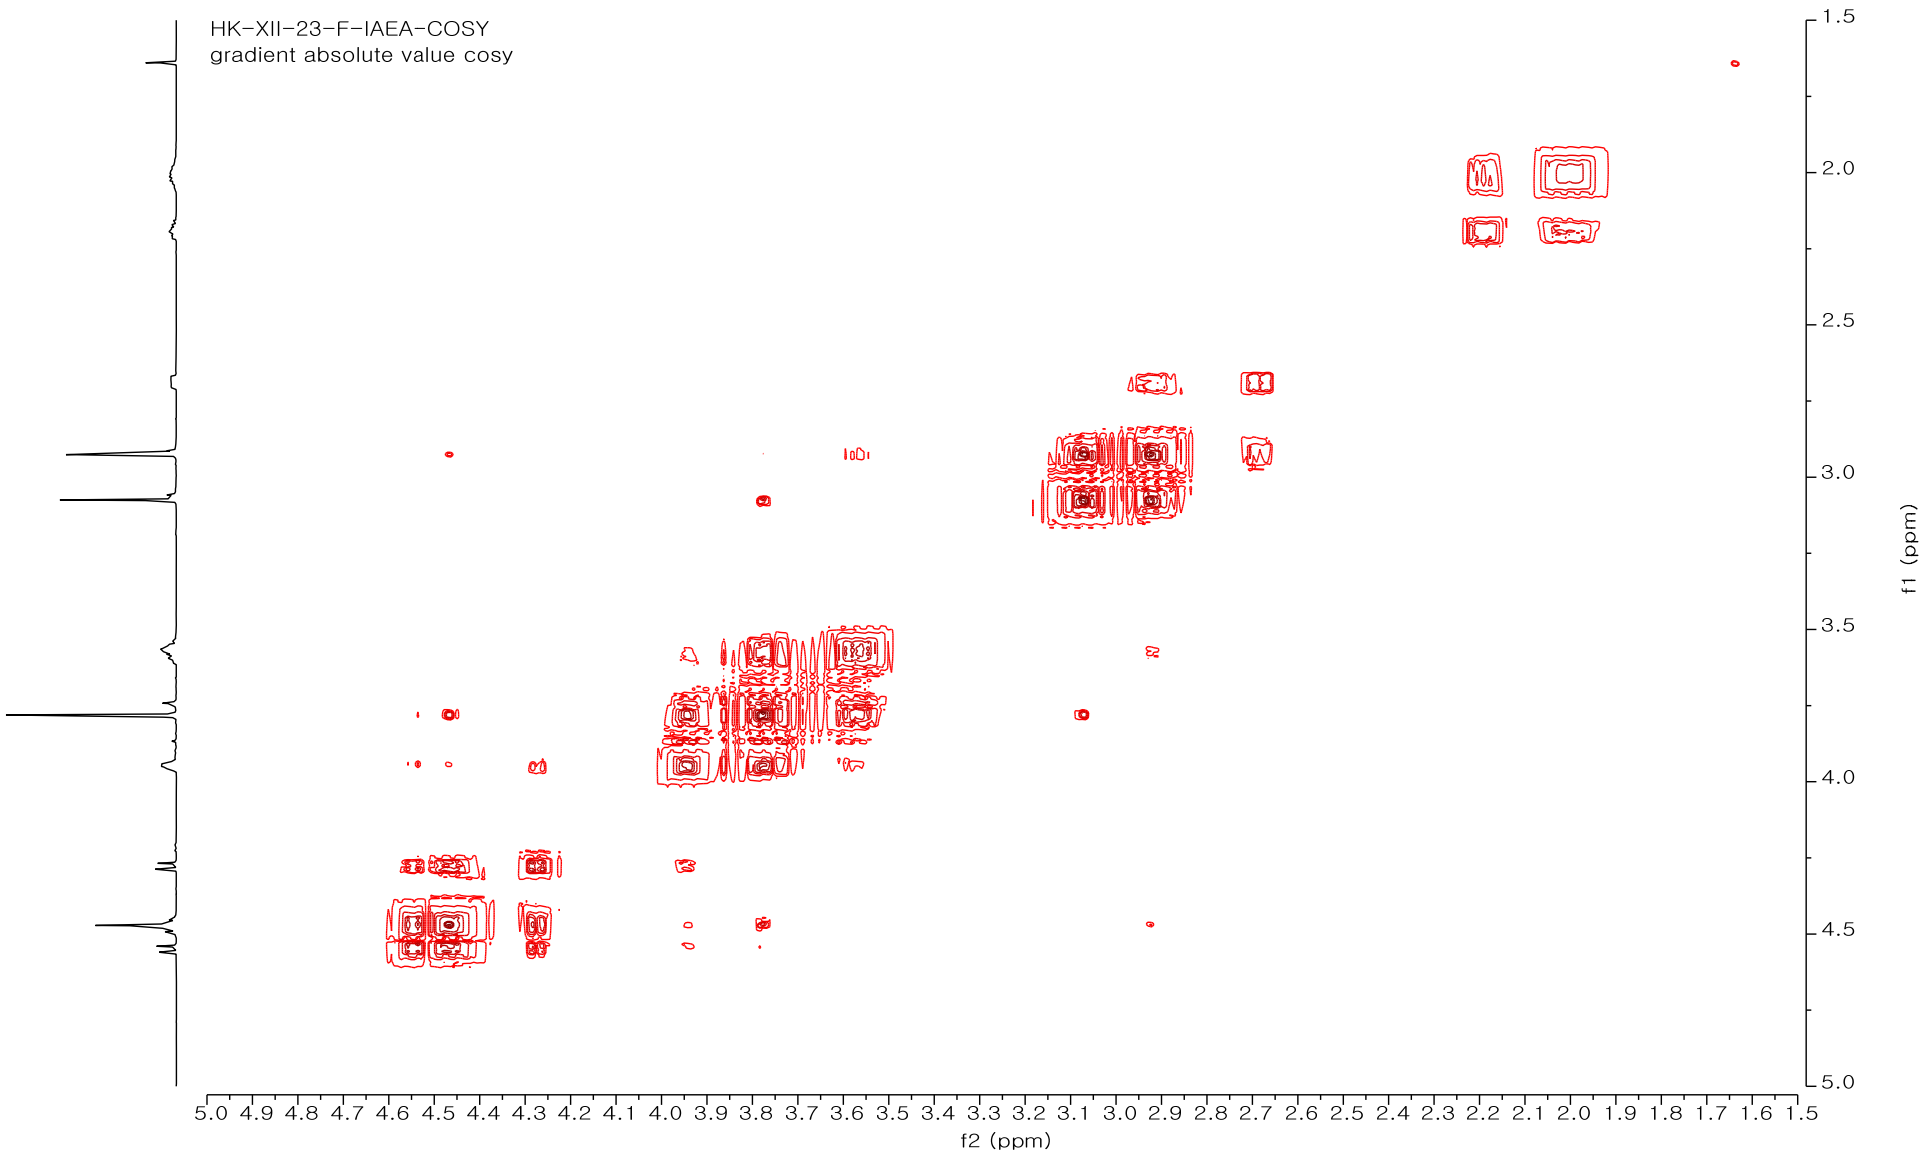

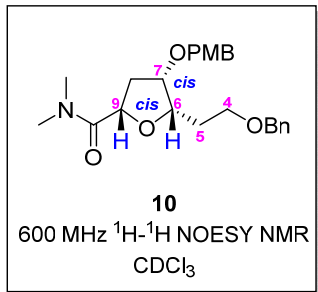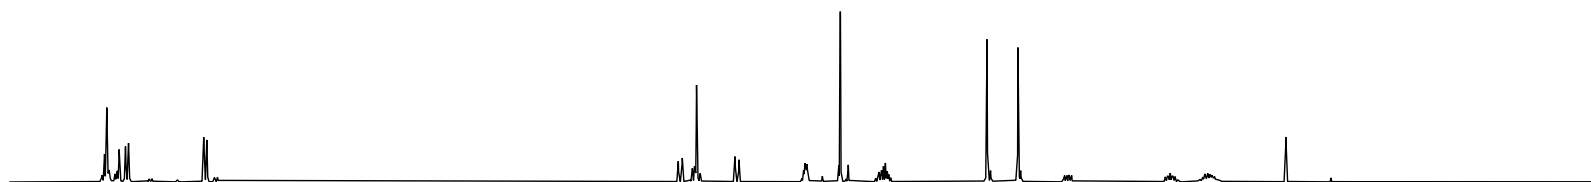

HK-XII-23F\_IAEA\_ELATENYNE  
phase sensitive noesy

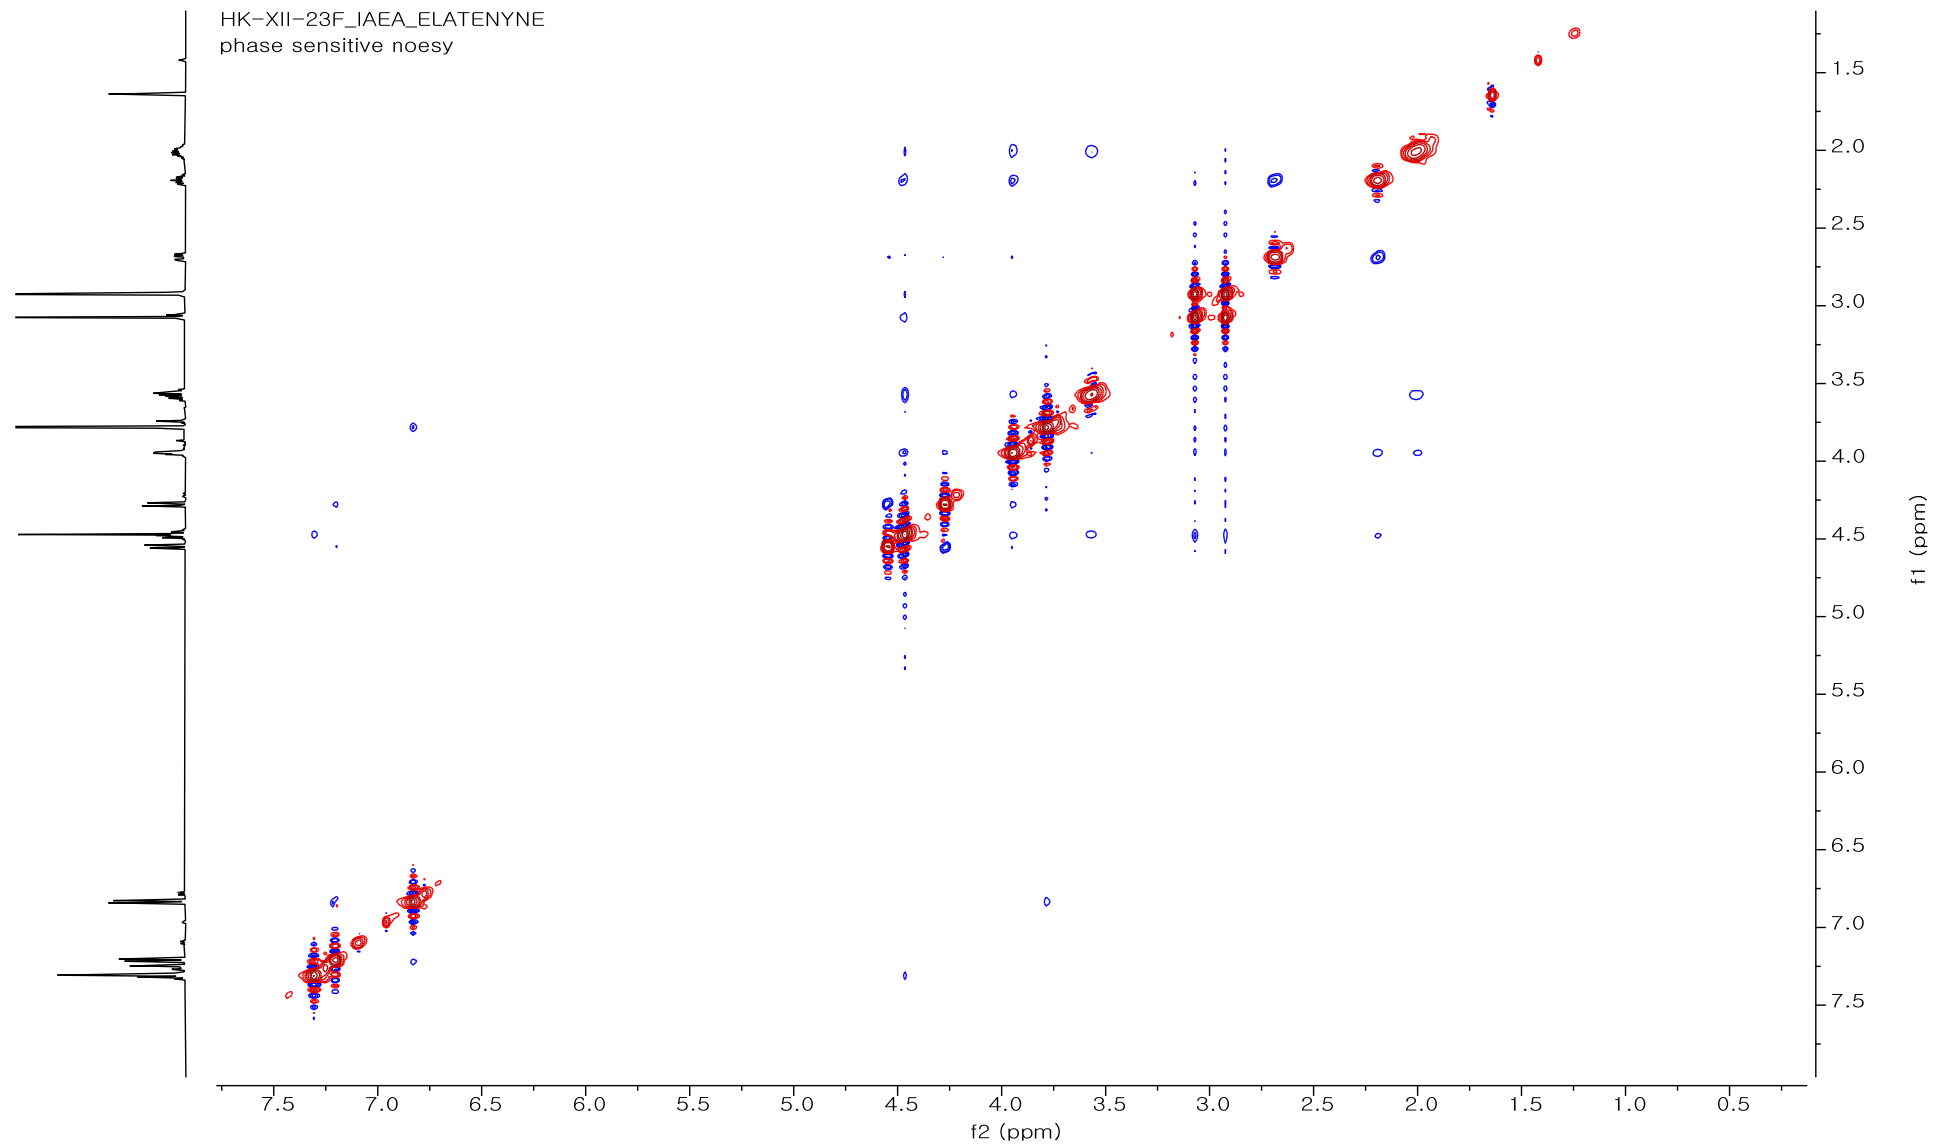

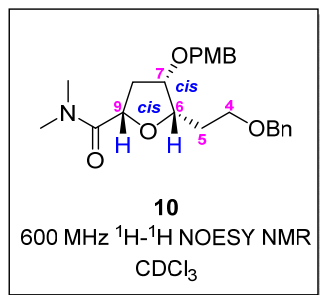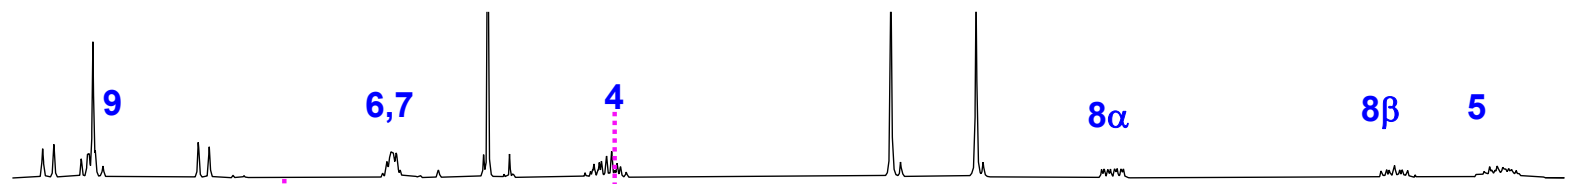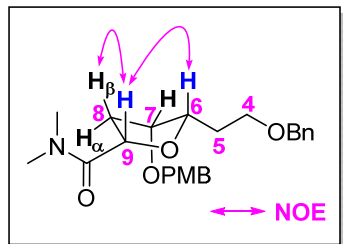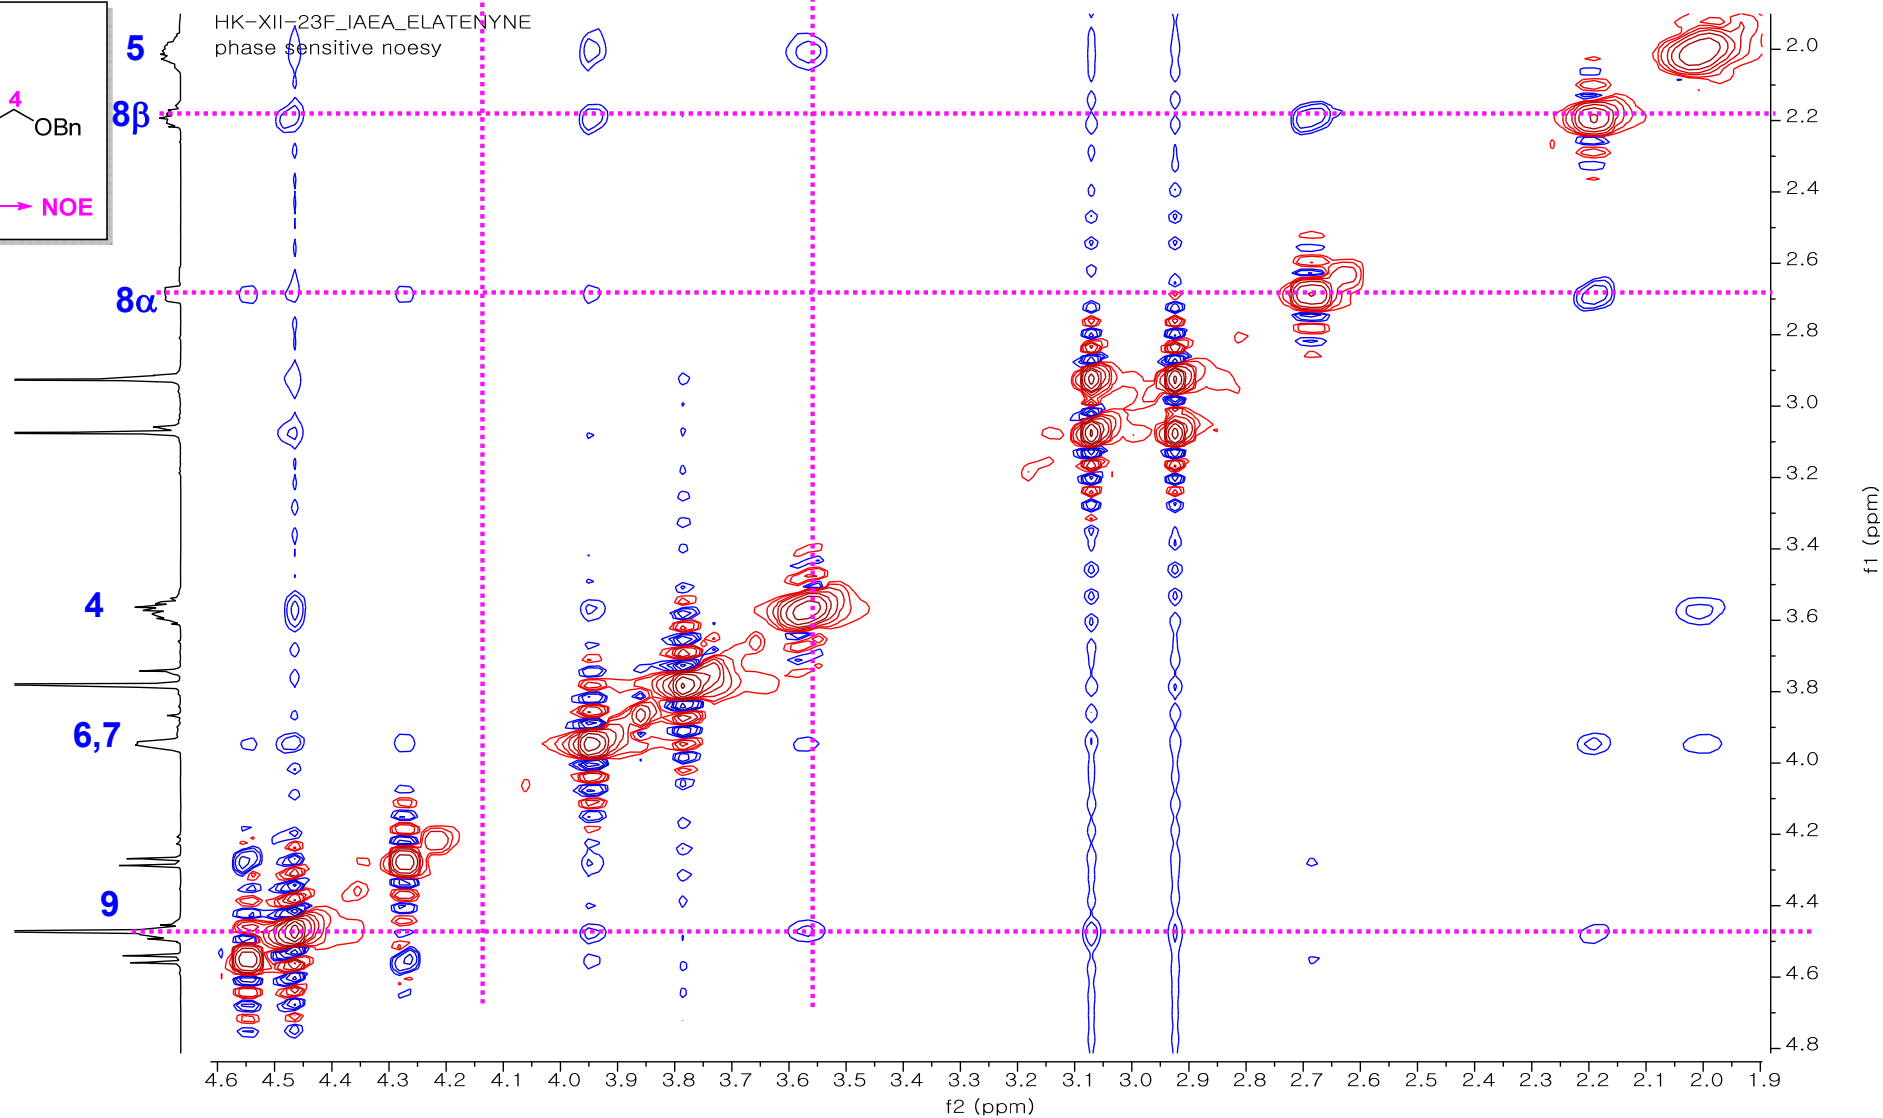



SK-11-118  
single pulse decoupled gated NOE

— 169.0225

— 138.5111

128.2887  
127.6076  
127.4642

— 79.8387

73.5262  
72.8833  
70.1617  
66.8848

36.4396  
35.4132  
34.6103  
— 29.2974

— 18.1423

— 12.7212

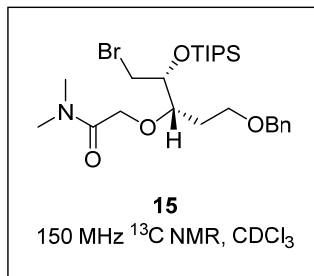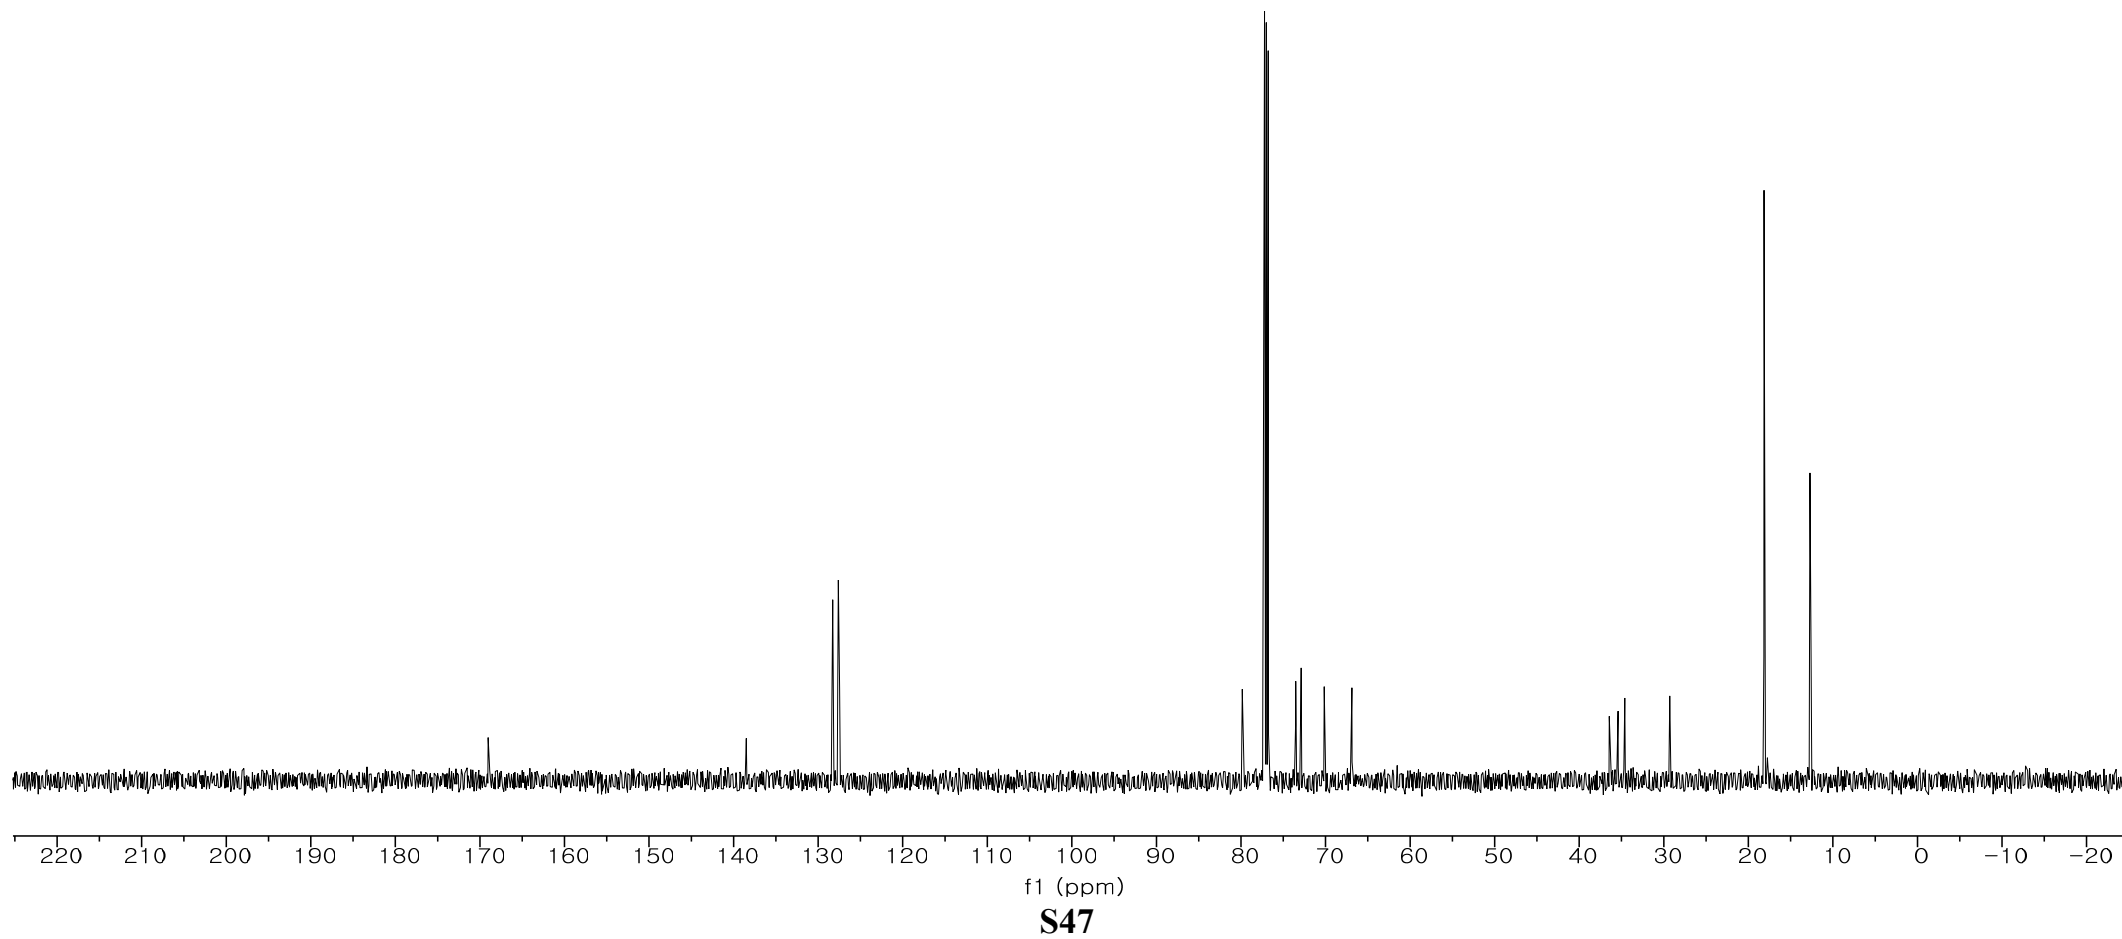

SK-11-1115-DATA  
 7.32880  
 7.32841  
 7.32803  
 7.2858  
 7.2821  
 7.2799  
 7.2658  
 7.2645  
 7.2569  
 7.2502  
 4.8257  
 4.8134  
 4.8011  
 4.5289  
 4.5084  
 4.5042  
 4.4998  
 4.4977  
 4.4954  
 4.4932  
 4.4906  
 4.4885  
 4.4845  
 4.0981  
 4.0916  
 4.0891  
 4.0852  
 4.0826  
 4.0787  
 4.0762  
 4.0697  
 3.6499  
 3.6401  
 3.6385  
 3.6345  
 3.6289  
 3.6238  
 3.6137  
 3.6117  
 3.6081  
 3.5999  
 3.5963  
 3.5845  
 3.0895  
 3.0801  
 3.0722  
 2.9572  
 2.9463  
 2.9335  
 2.9262  
 2.5833  
 2.5746  
 2.5705  
 2.5616  
 2.5528  
 2.5487  
 2.5400  
 2.0670  
 2.0552  
 2.0528  
 2.0509  
 2.0453  
 2.0410  
 2.0335  
 2.0291  
 1.9612  
 1.9577  
 1.9516  
 1.9488  
 1.9456  
 1.9403  
 1.9371  
 1.9336  
 1.9273  
 1.9250  
 1.9217  
 1.9153  
 1.644  
 1.168  
 1.032  
 0.983  
 0.949  
 1.0931  
 1.0913  
 1.0876  
 1.0791  
 1.0722  
 1.0658  
 1.0633  
 1.0569  
 1.0551  
 1.0532  
 1.0499  
 1.0451  
 1.0368  
 1.0277  
 1.0180  
 1.0158  
 1.0081  
 1.0002  
 0.9799  
 0.9679  
 0.9606  
 0.9559  
 0.9467  
 -0.0021

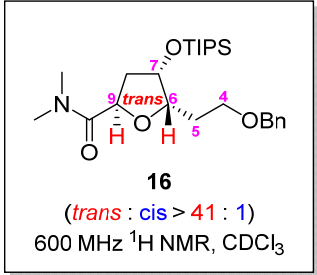

The diastereoselectivity (*trans*:*cis*) was determined to be greater than 41:1, on the assumption that the minor peak corresponds to the *cis* isomer.

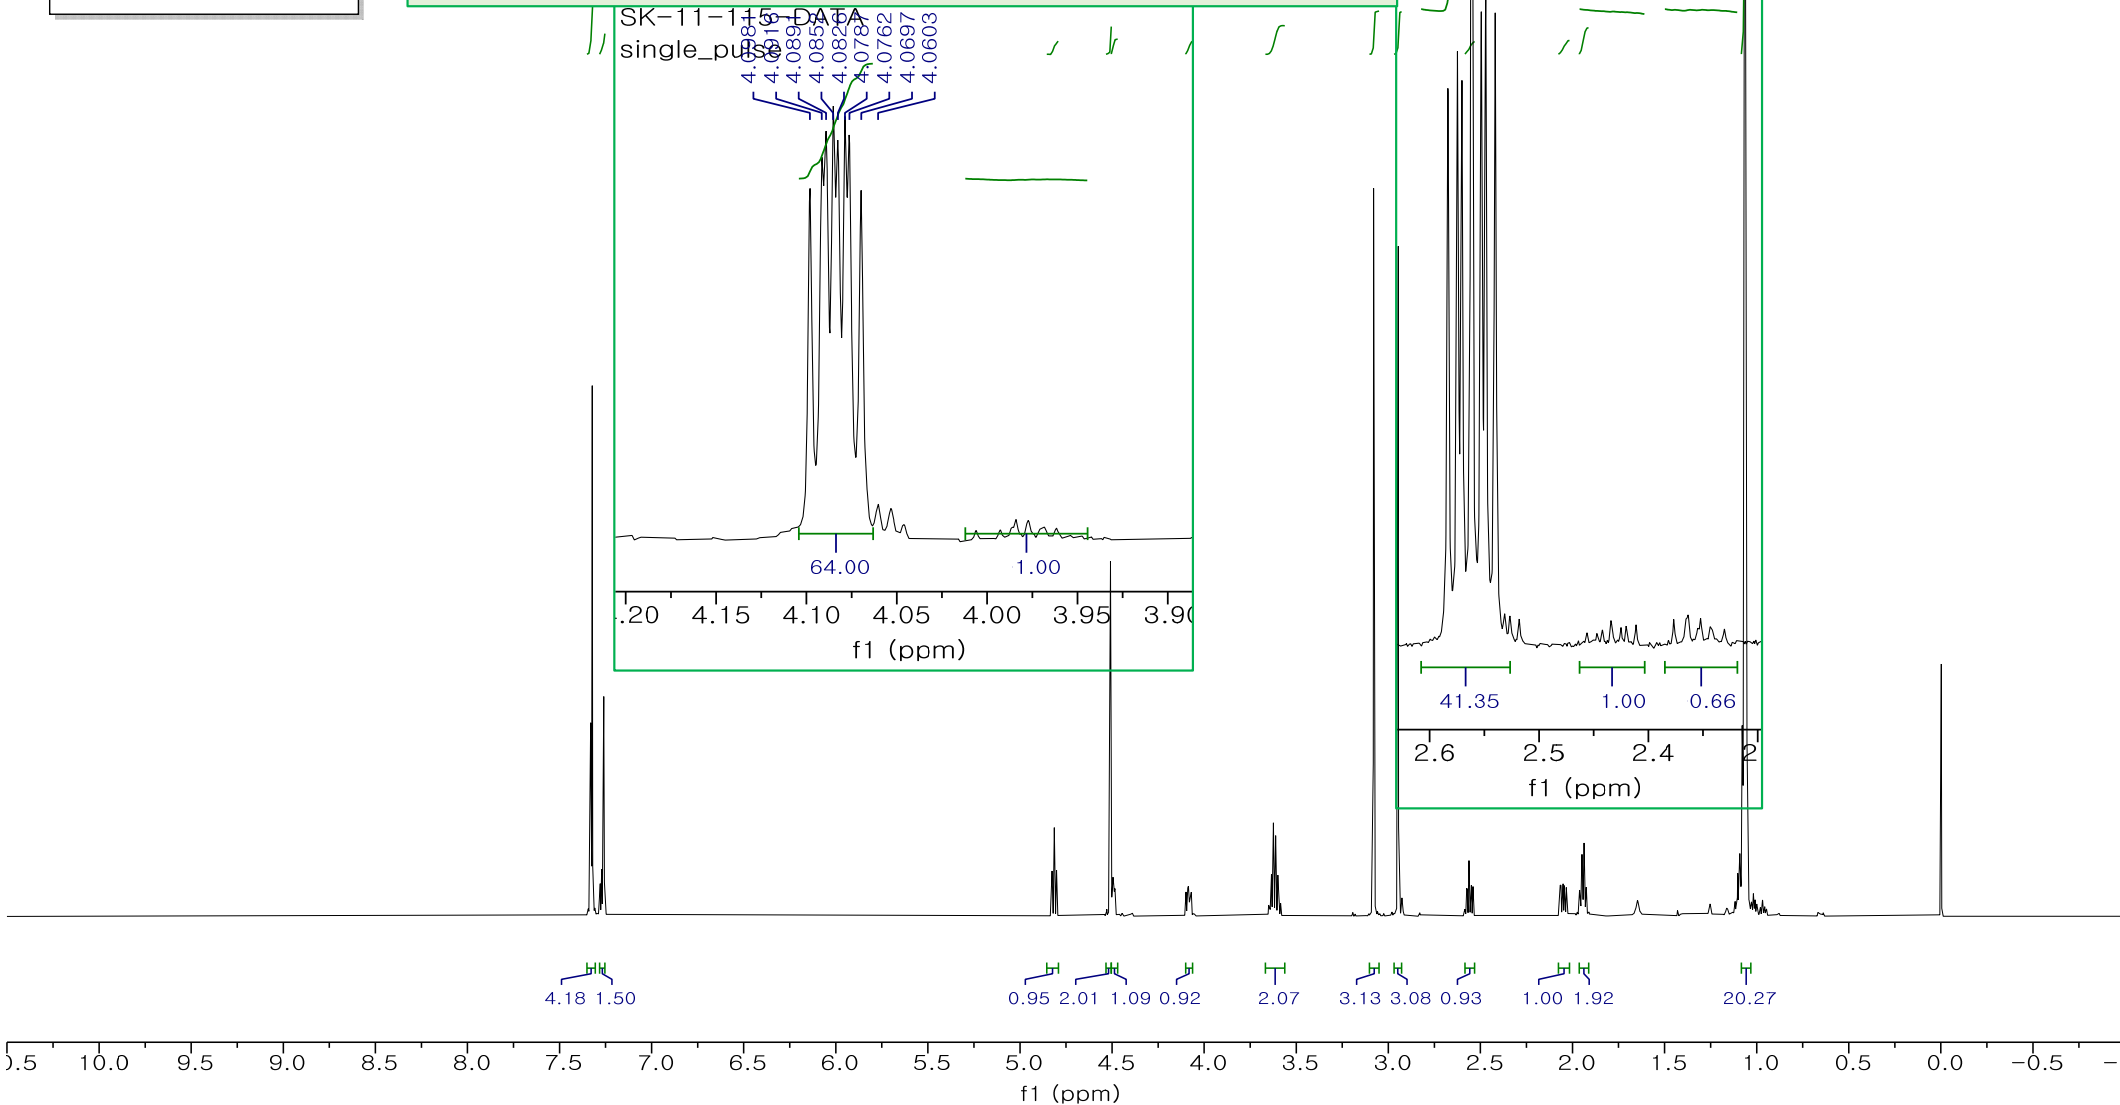



SK-11-115  
single pulse decoupled gated NOE

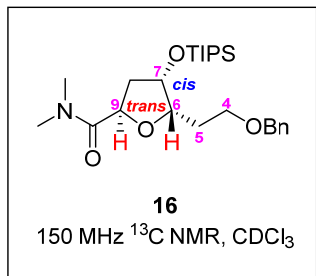

— 171.1628

— 138.6130

128.2912  
127.6381  
127.4316

— 80.5391

74.1006  
73.7271  
72.9876  
— 67.9328

38.4881  
36.9946  
35.8063  
— 29.9137

18.0912  
18.0540  
— 12.3512

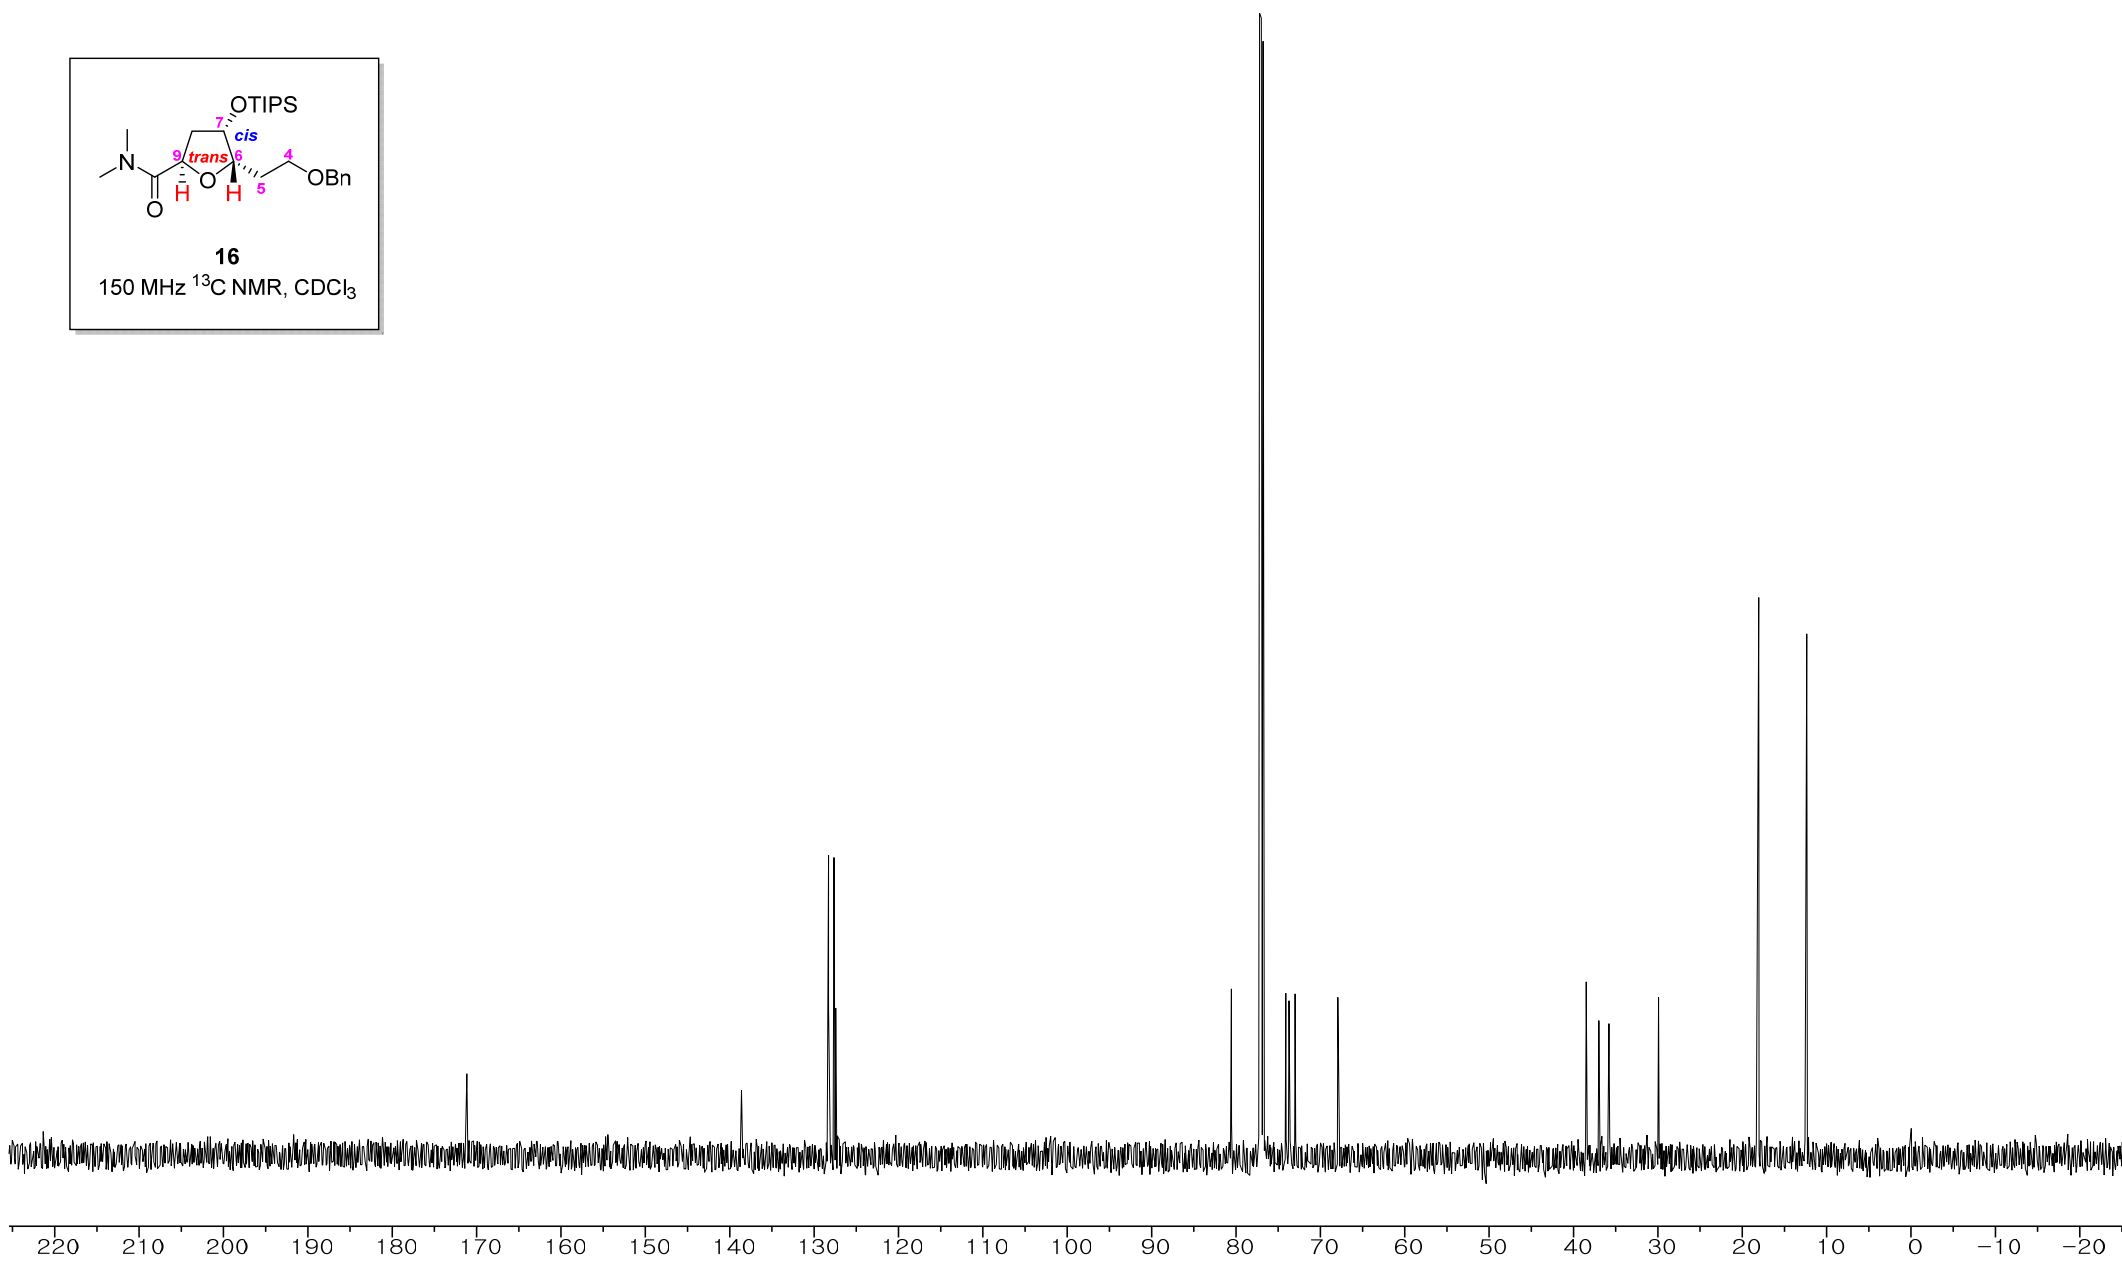

f1 (ppm)

**S49**

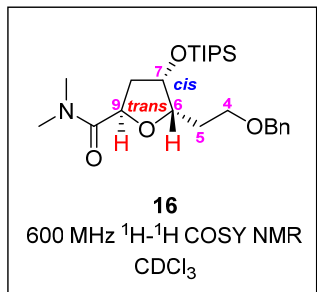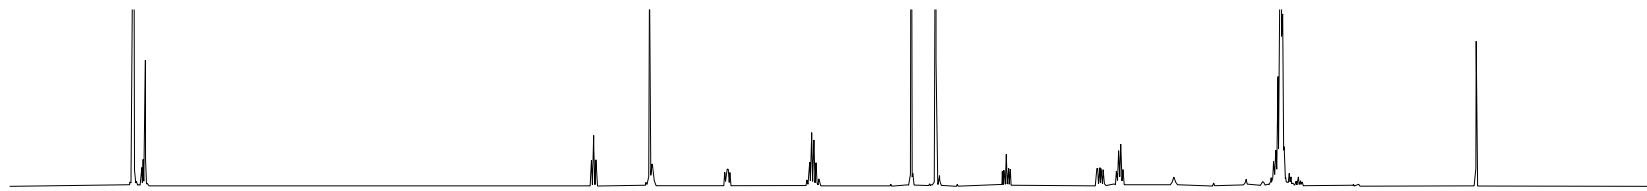

SK-11-115-DATA  
gradient absolute value cosy

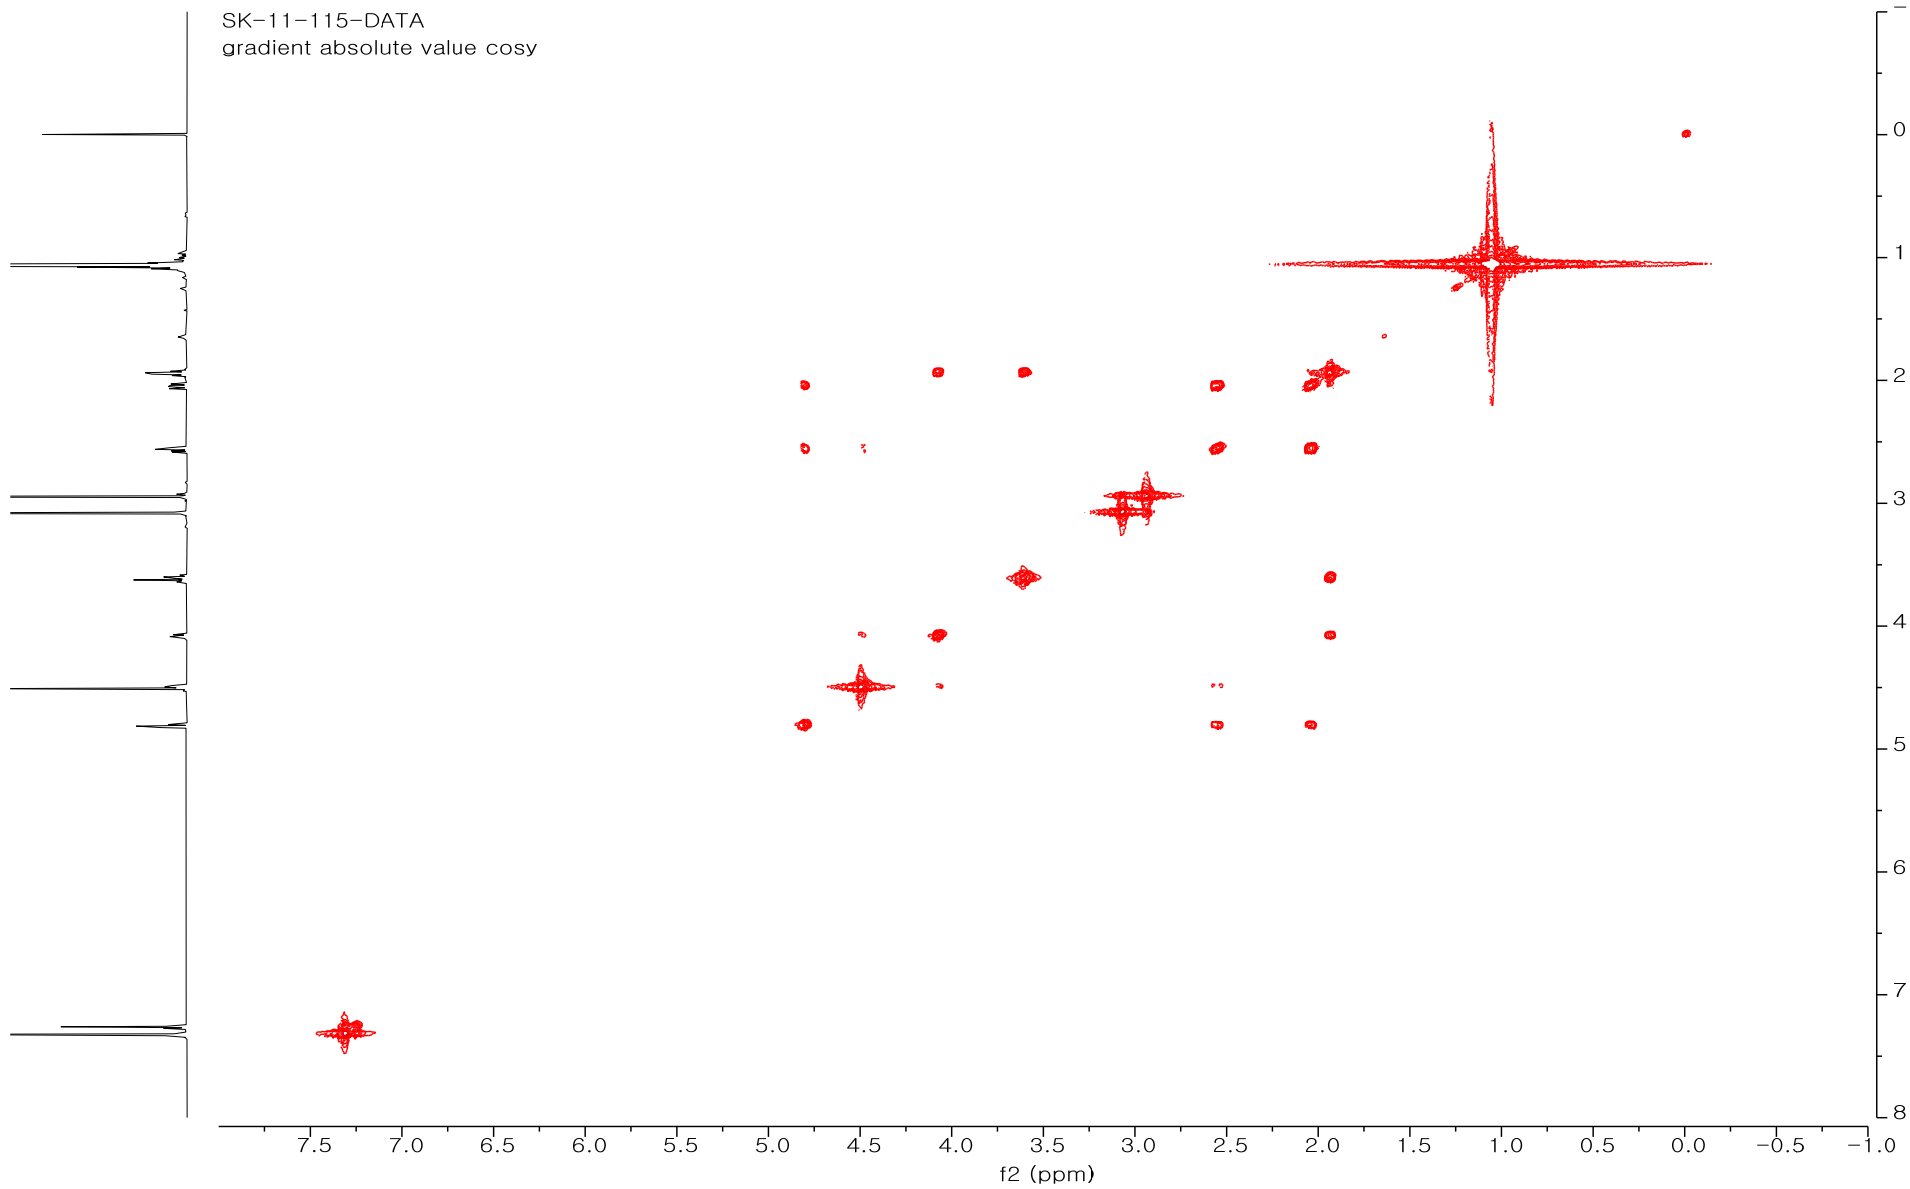

S50

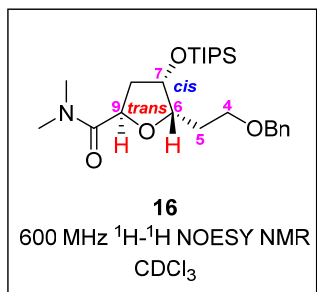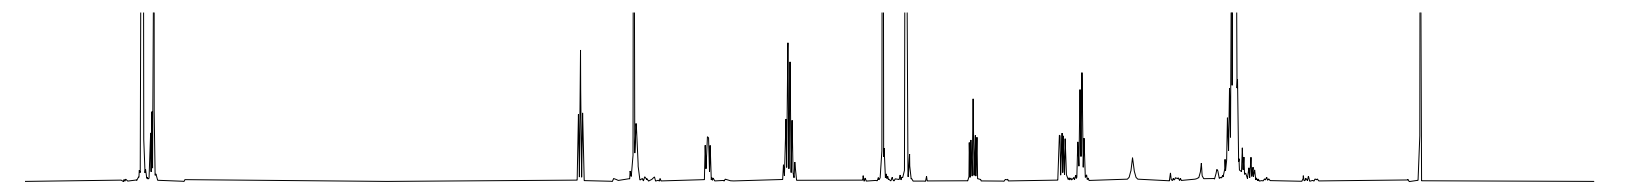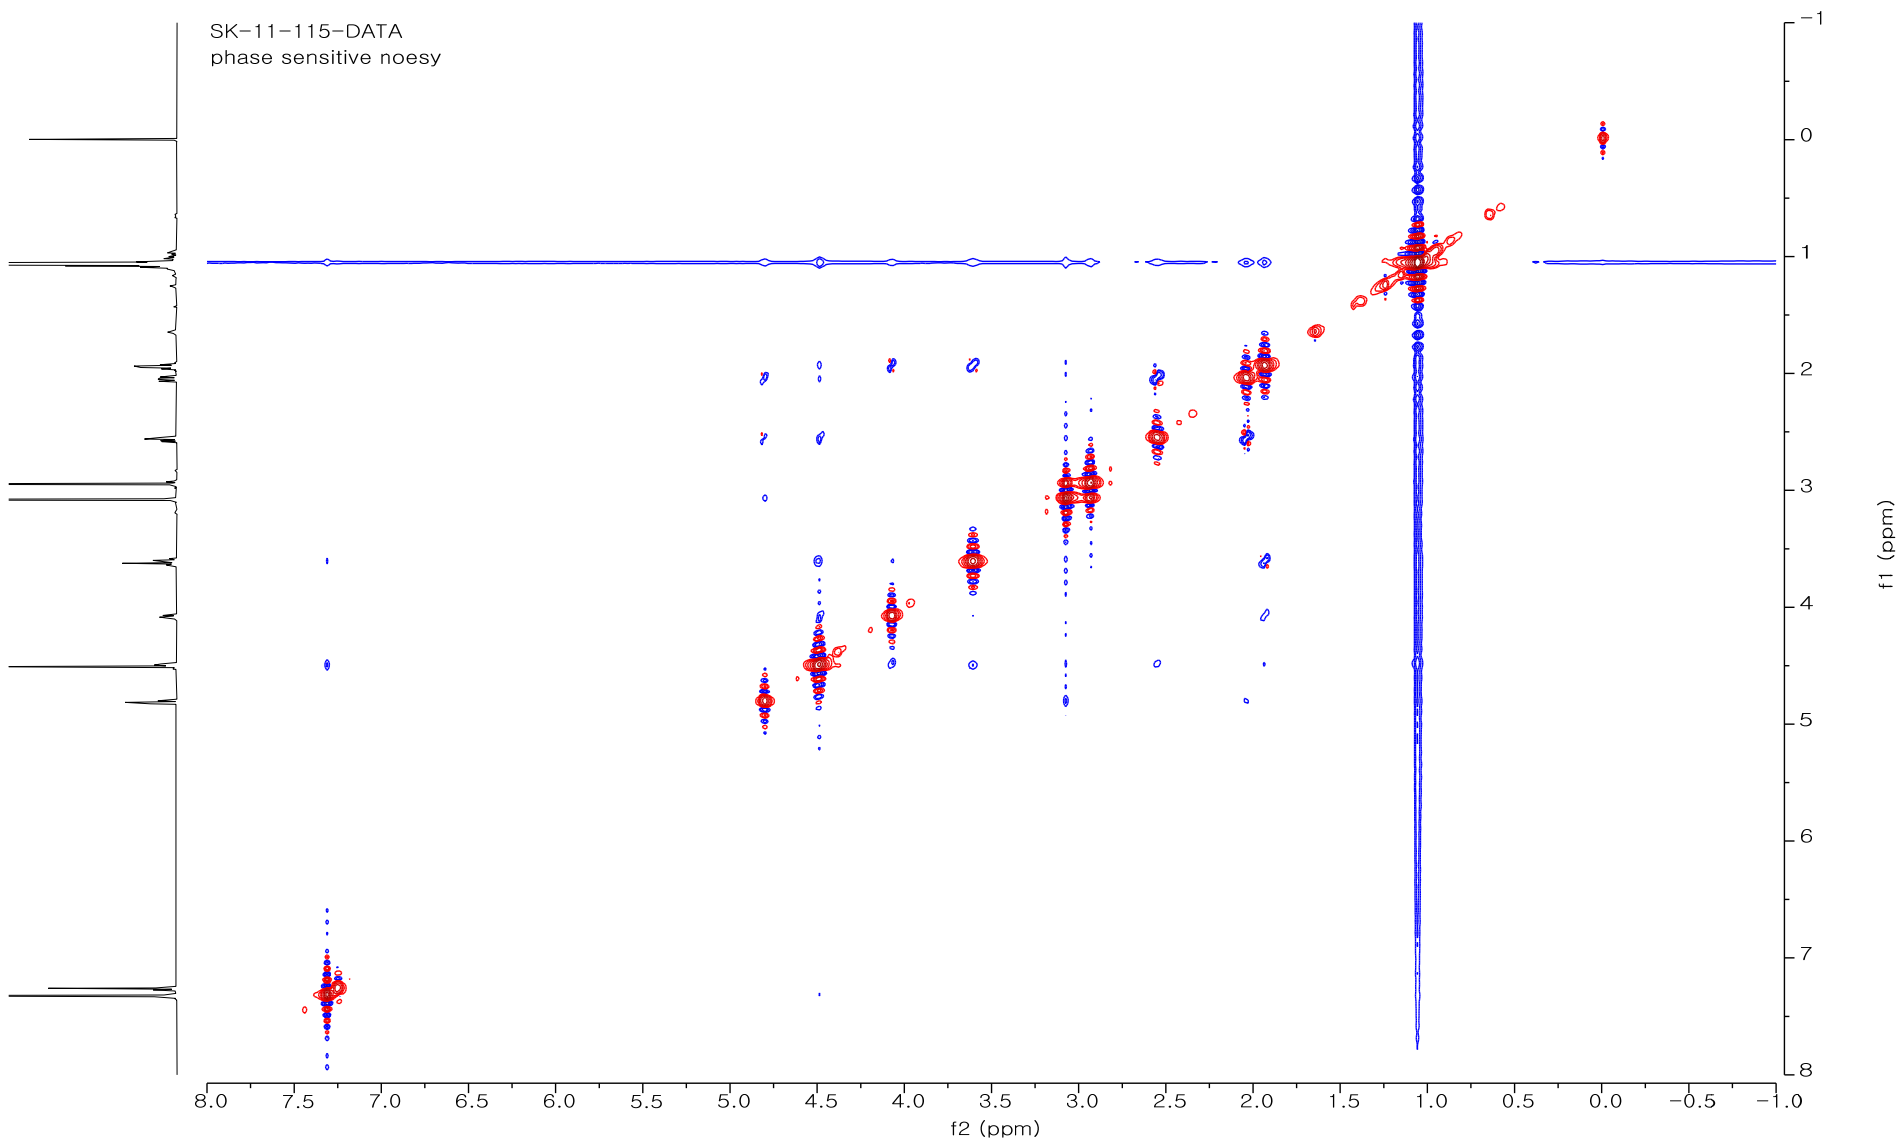

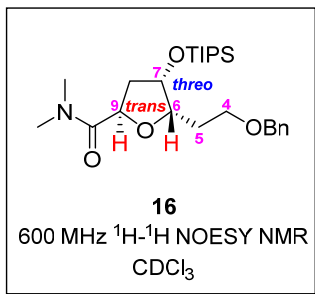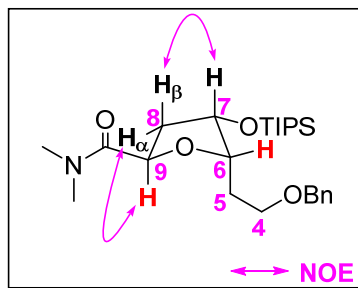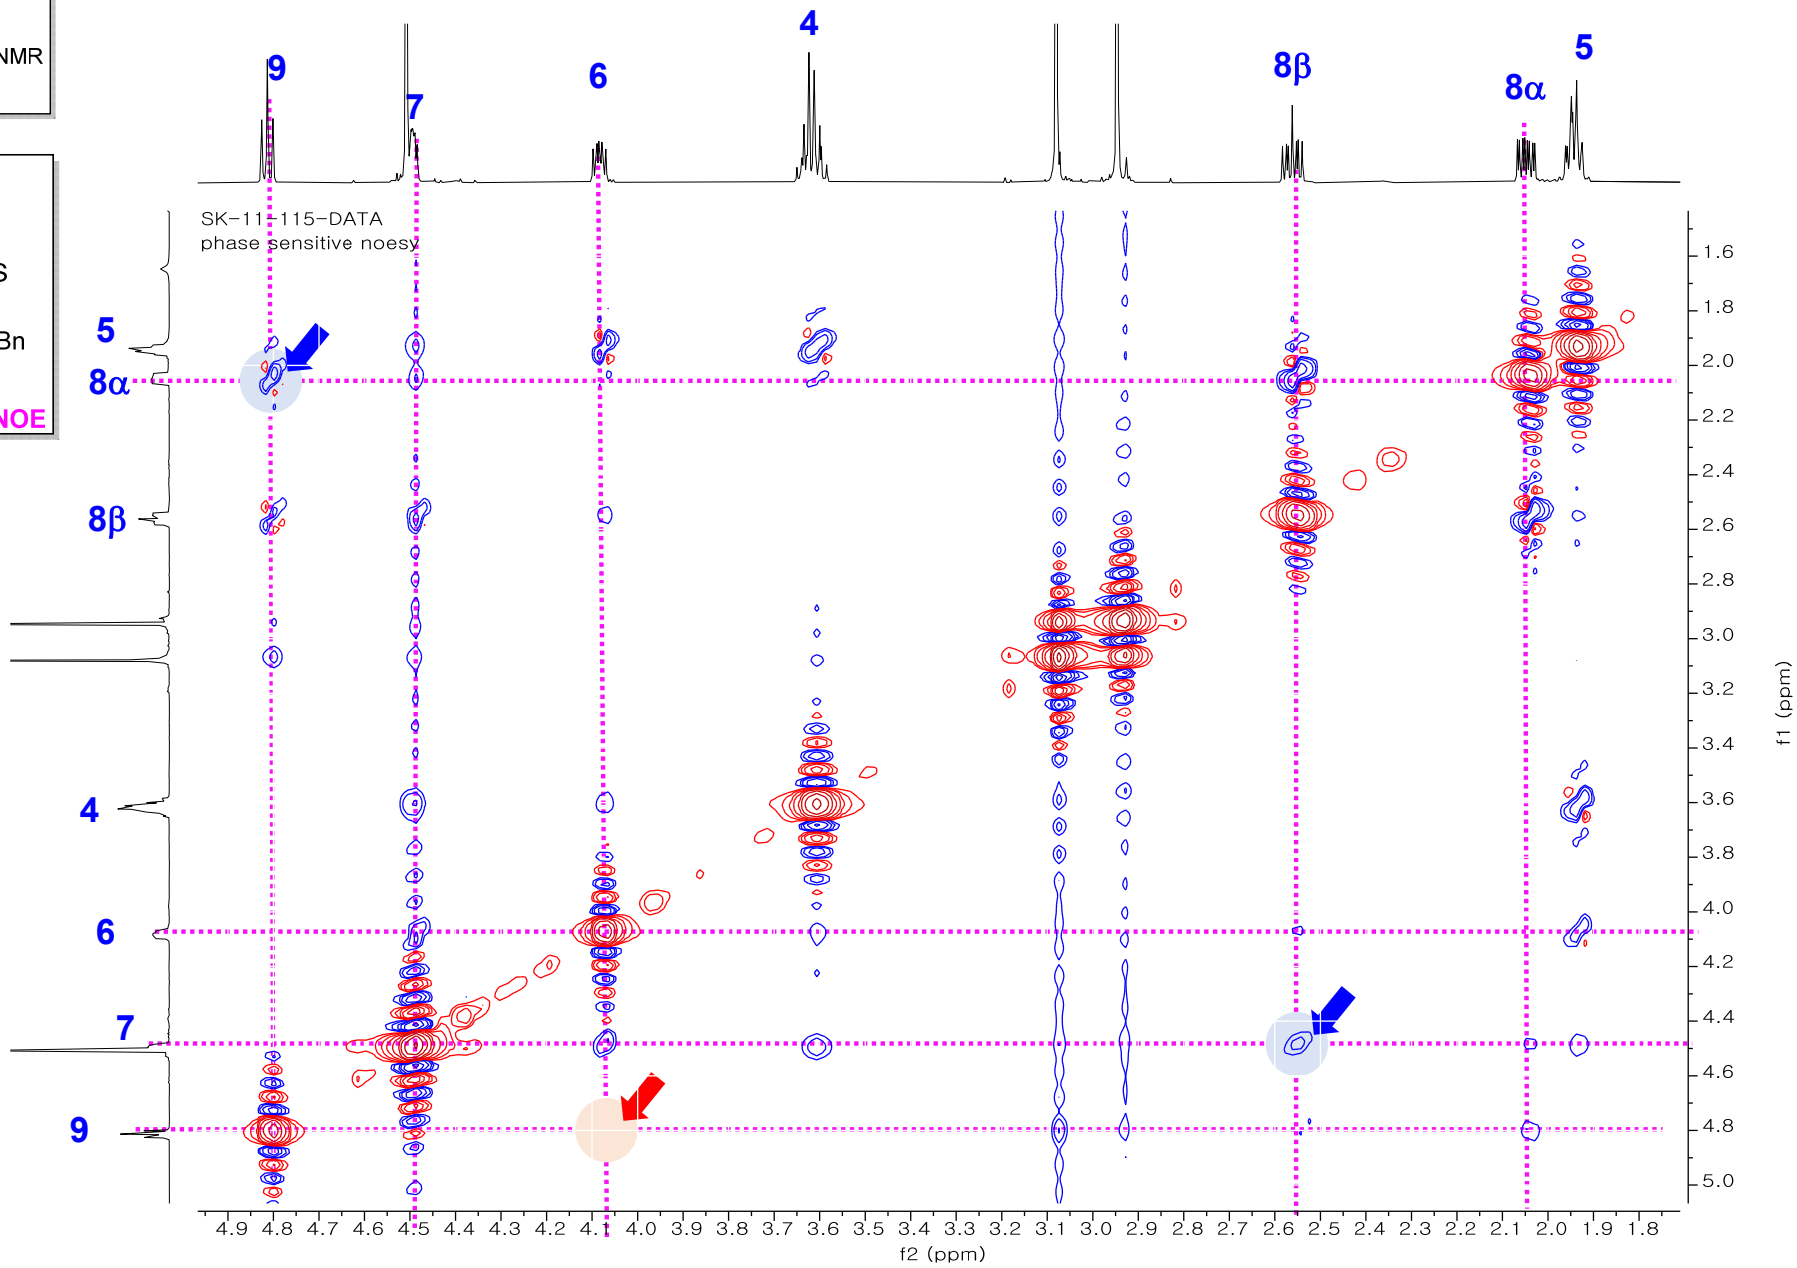

7.31300  
7.30841  
7.30591  
7.3005  
7.3021  
7.3027  
7.3027  
7.3044  
7.3044  
7.3470  
7.3453  
7.3438  
7.3418  
7.3174  
7.3152  
7.3062  
7.3030  
7.2960  
7.2927  
7.2583  
7.2571  
7.2558  
4.9325  
4.9207  
4.9185  
4.5489  
4.5294  
4.5192  
4.4997  
4.3614  
4.3569  
4.3523  
4.3477  
4.3432  
4.0513  
4.0463  
4.0429  
4.0378  
4.0350  
4.0300  
4.0265  
4.0215  
3.6800  
3.6834  
3.6812  
3.6756  
3.6733  
3.6677  
3.6654  
3.6598  
3.5079  
3.5038  
3.4922  
3.4902  
3.4880  
3.4861  
3.4745  
3.4703  
3.2563  
3.2529  
3.2493  
3.0765  
3.0736  
3.0722  
3.0707  
2.9530  
2.9490  
2.9473  
2.9473  
2.4983  
2.4957  
2.4845  
2.1913  
2.1902  
2.1889  
2.1793  
2.1782  
2.1771  
2.1686  
2.1676  
2.1664  
2.1568  
2.1545  
2.0969  
2.0912  
2.0804  
2.0789  
2.0748  
2.0733  
2.0628  
2.0571  
2.0480  
2.0441  
2.0400  
2.0357  
2.0318  
2.0276  
2.0155  
1.5858  
1.2518  
1.2507  
0.0027  
-0.0028  
-0.0057  
-0.0069  
-0.0084

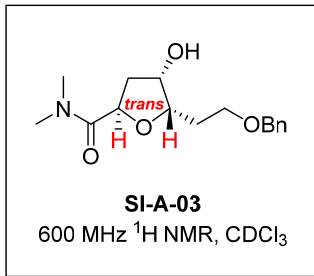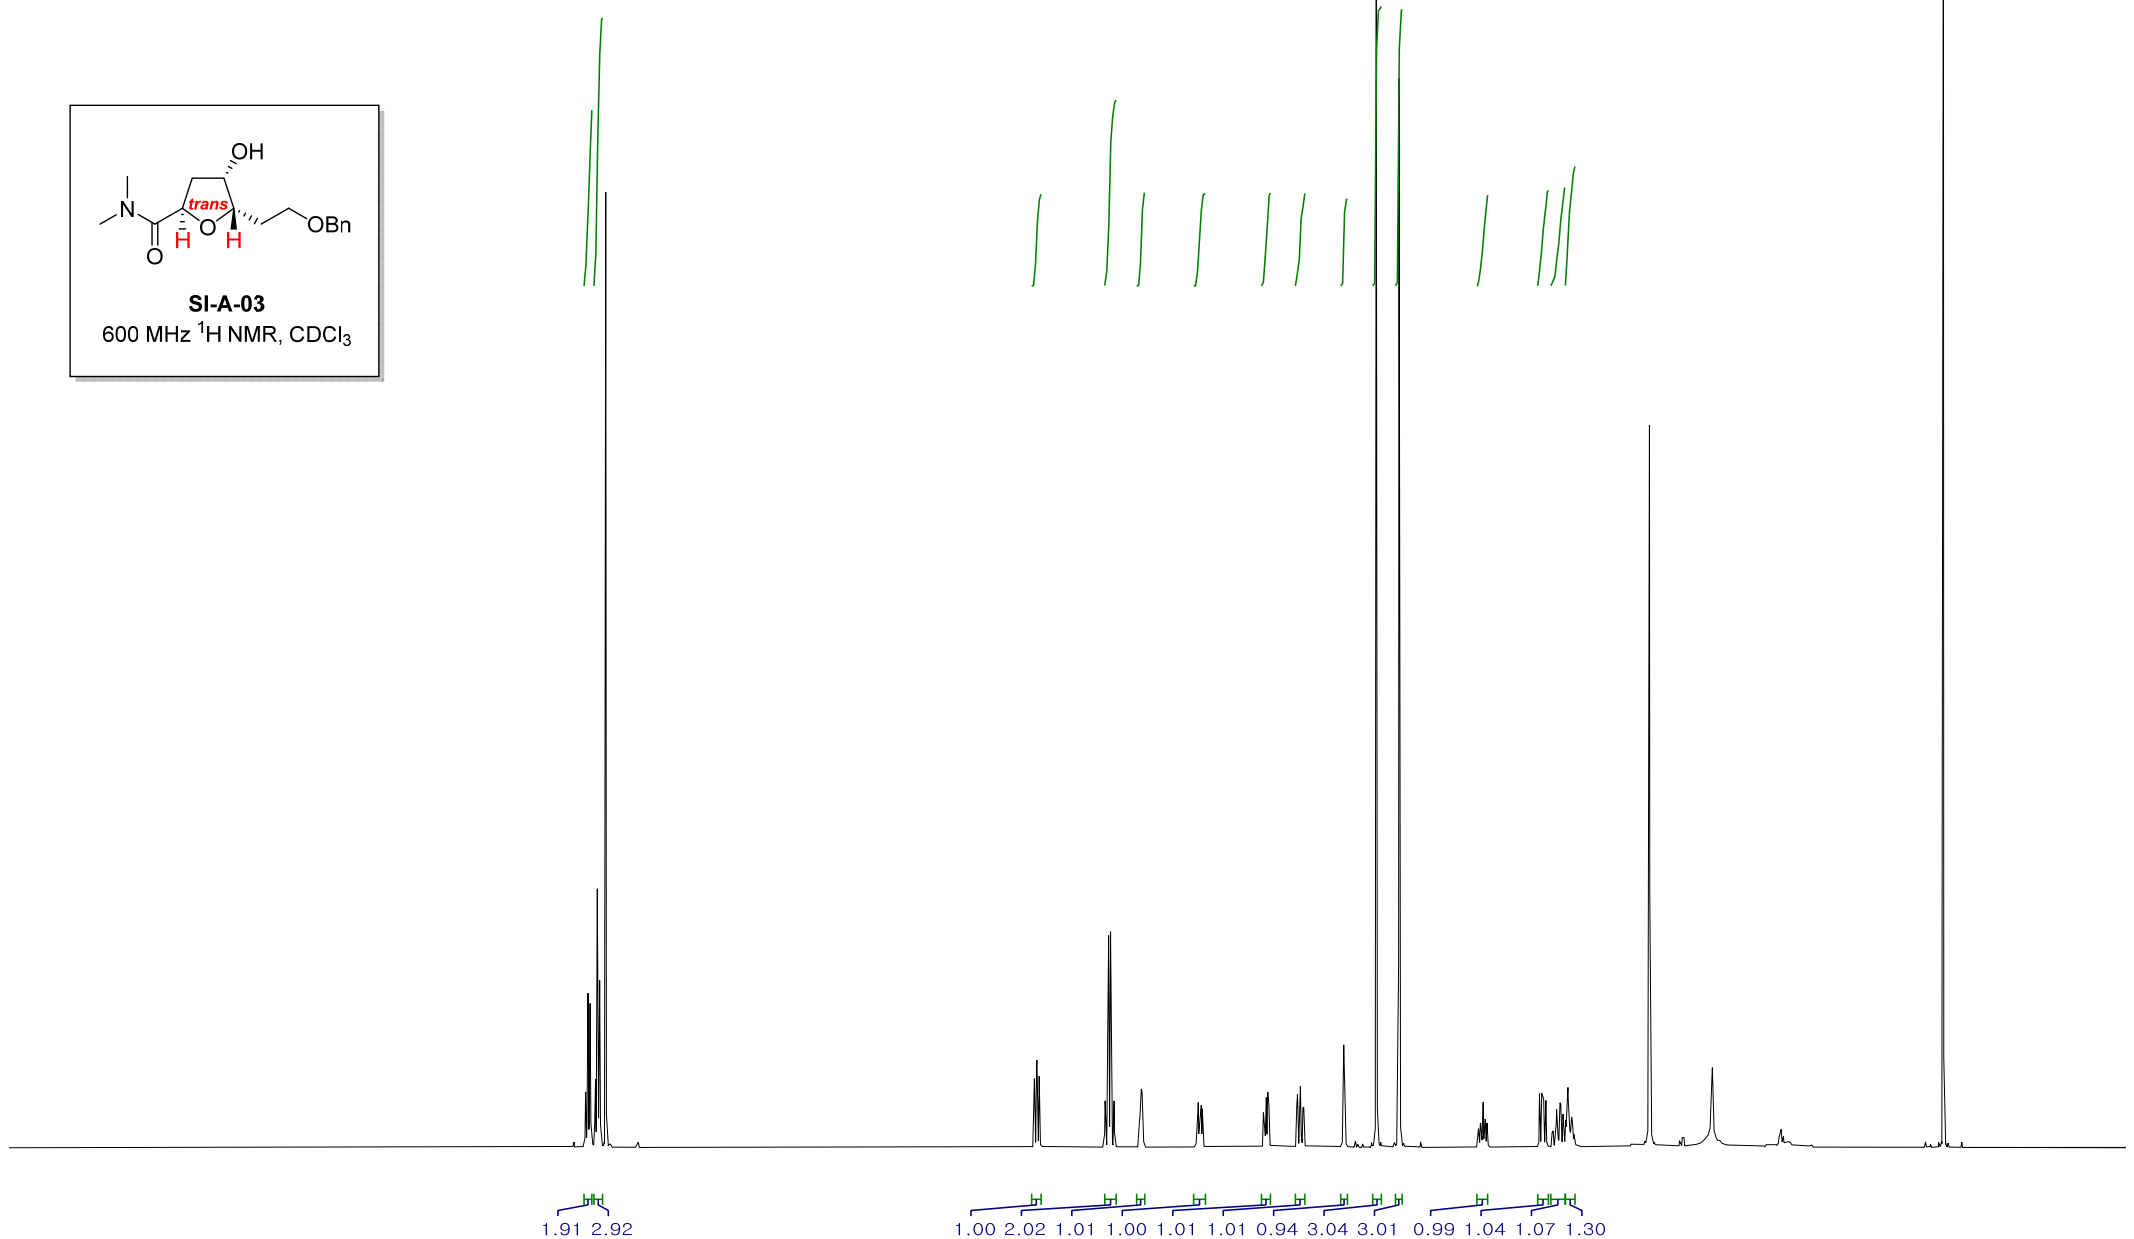

7.5 10.0 9.5 9.0 8.5 8.0 7.5 7.0 6.5 6.0 5.5 5.0 4.5 4.0 3.5 3.0 2.5 2.0 1.5 1.0 0.5 0.0 -0.5 -

f1 (ppm)

S53

SK-11-119-DATA-1  
single pulse decoupled gated NOE

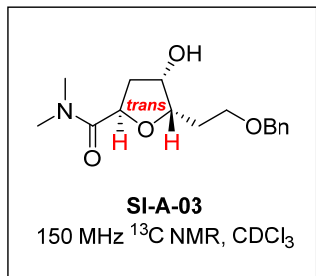

— 171.5832

— 137.3176

128.5978  
128.0130  
127.7931

— 83.4790

73.8064  
73.6647  
72.6303

— 66.9457

37.2285  
36.8650  
35.7633

— 29.2711

— -0.0244

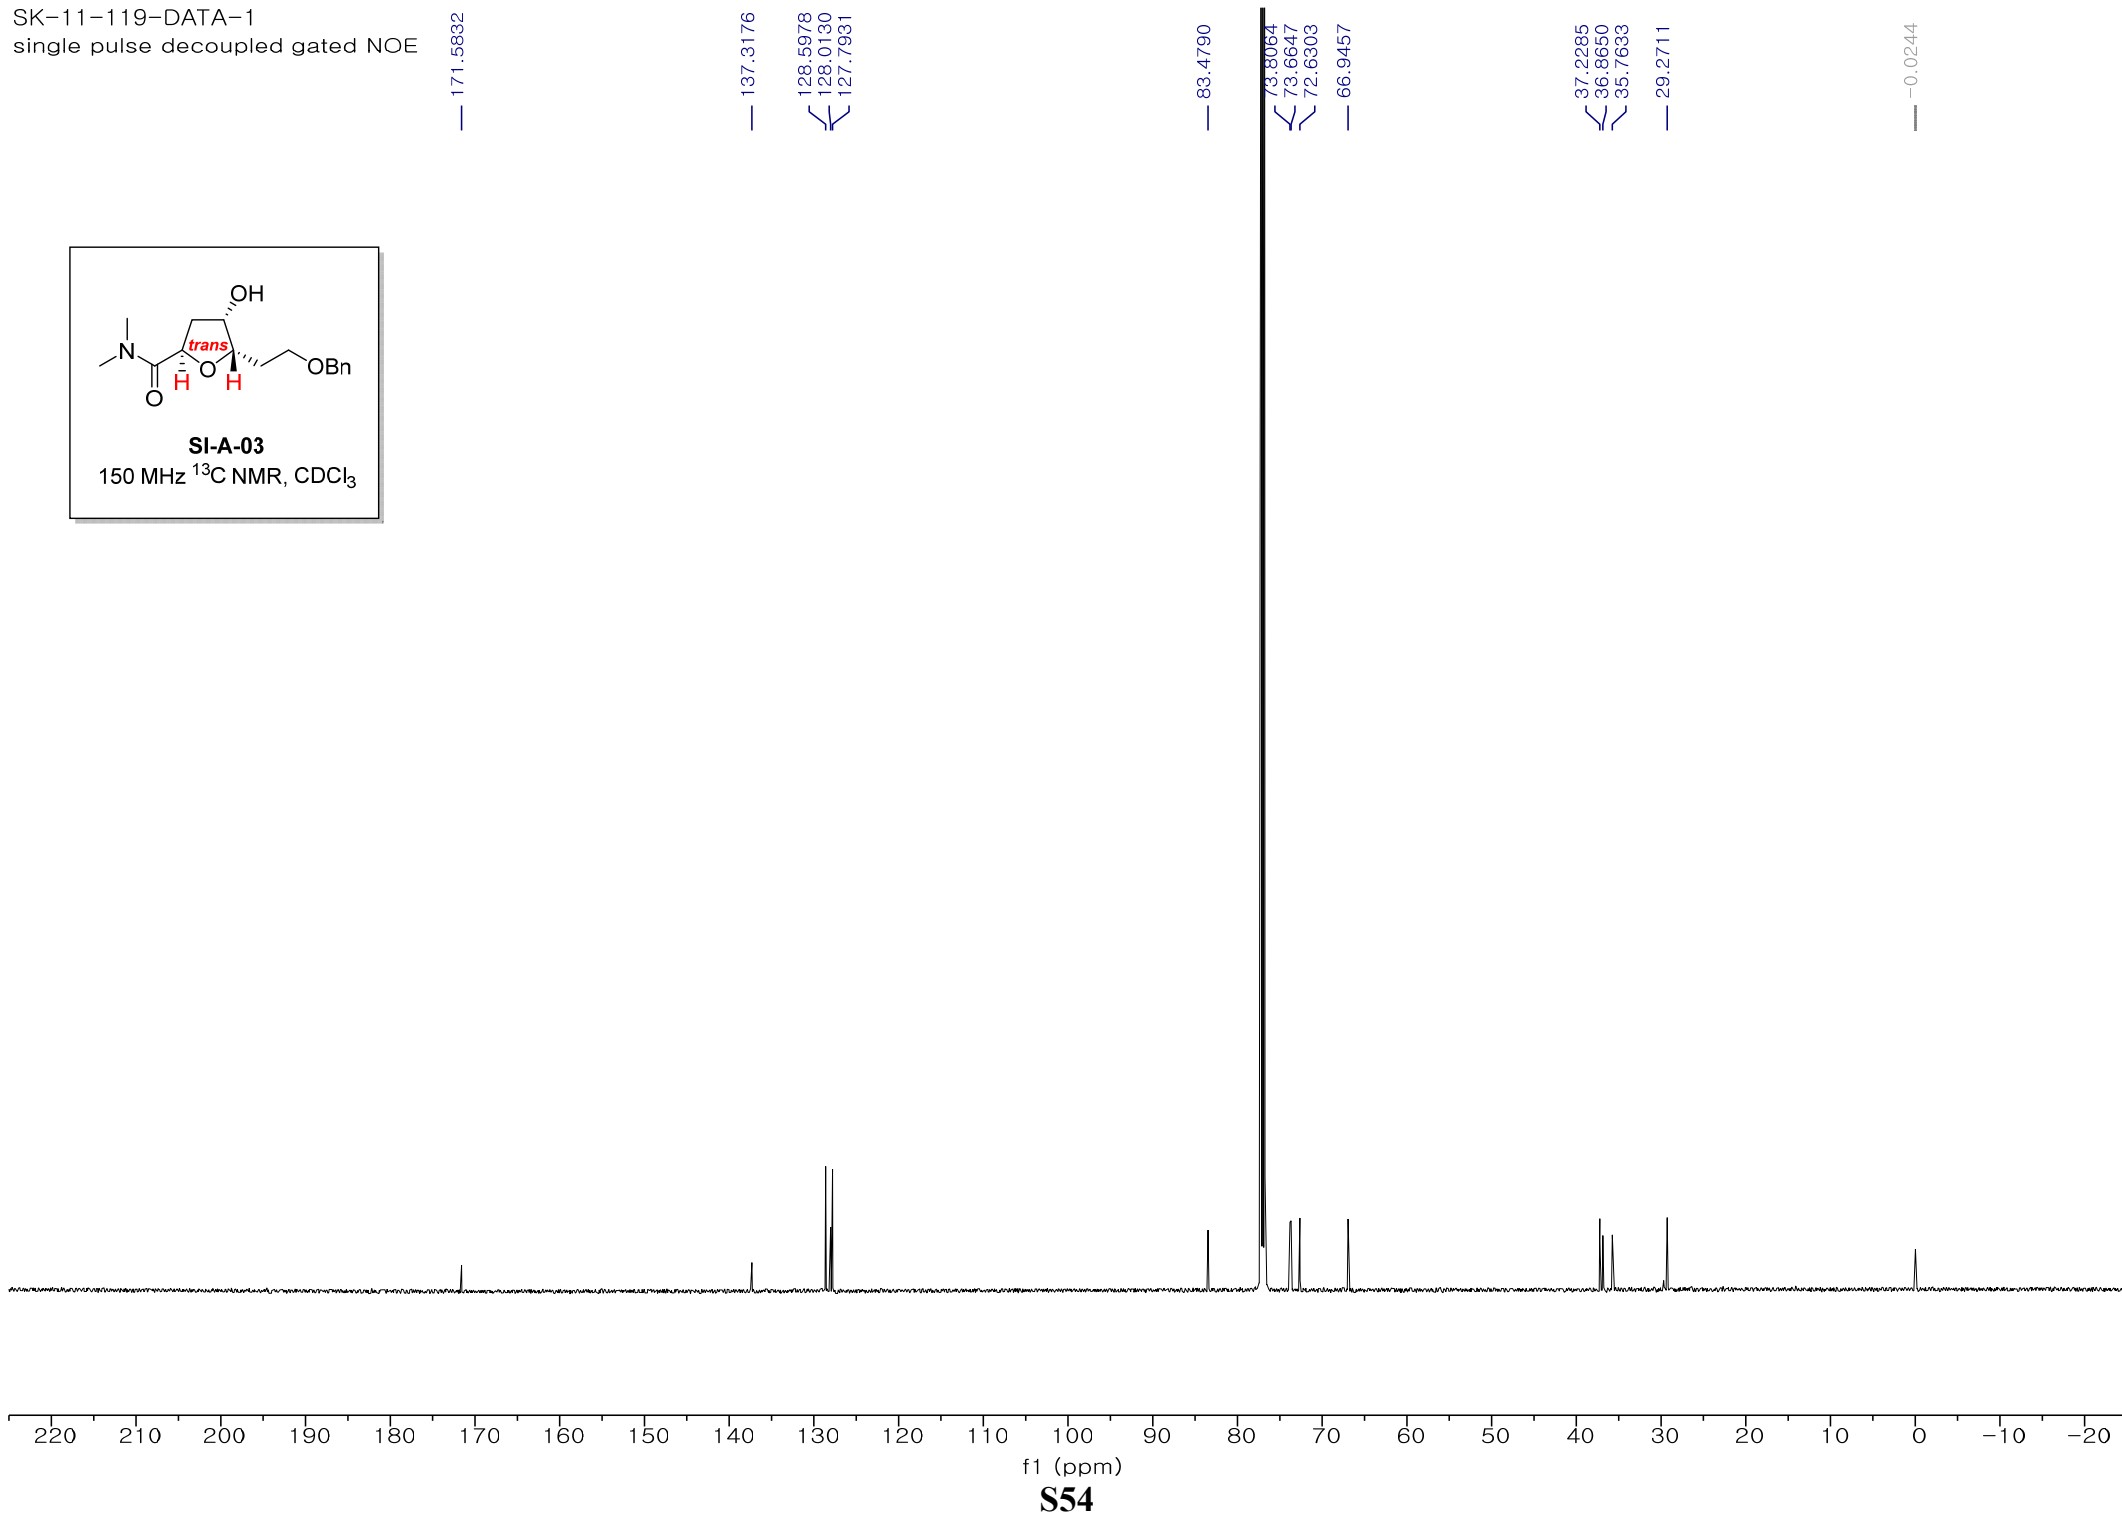

f1 (ppm)  
**S54**

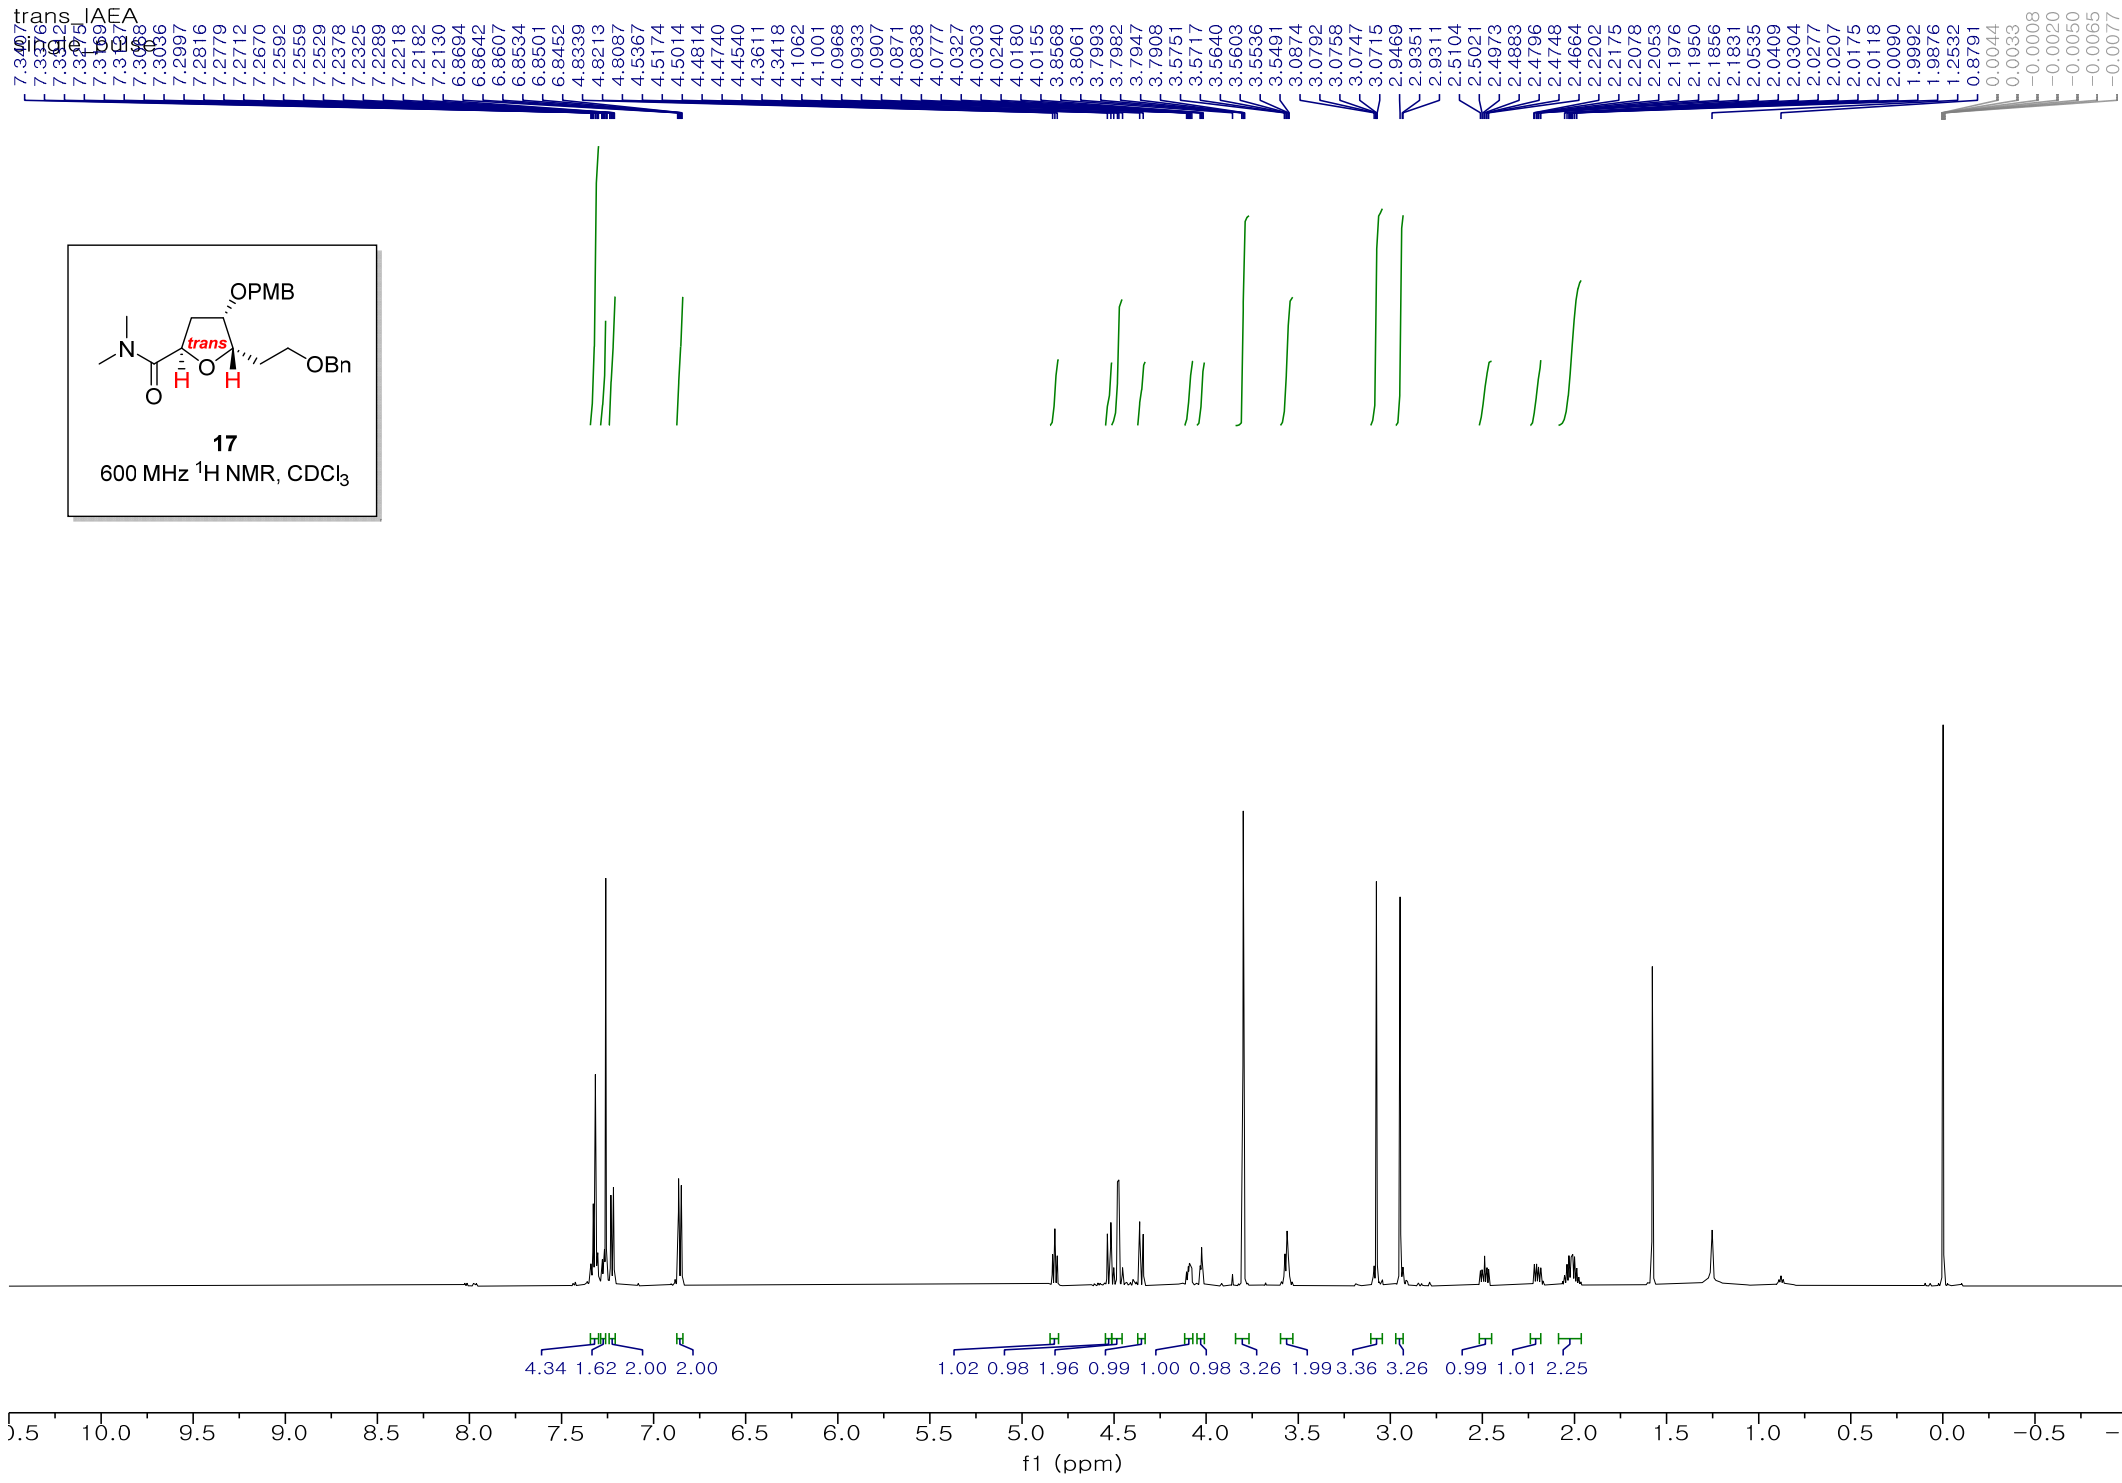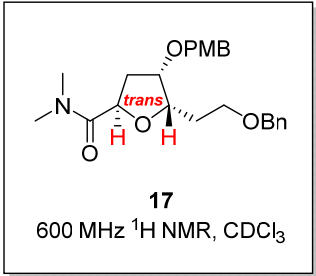

Elatenyne\_IAEA-trans-2  
single pulse decoupled gated NOE

— 171.0887

— 159.1733

— 138.5051

130.2417

129.2292

128.3051

127.6261

127.4630

— 113.7478

80.0301

79.1151

74.0752

72.9350

70.9522

67.7162

— 55.2440

36.9760

35.8057

34.3126

— 29.3880

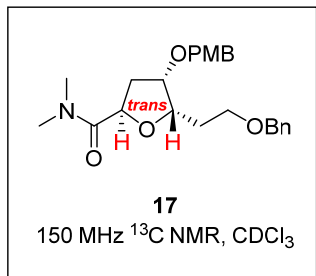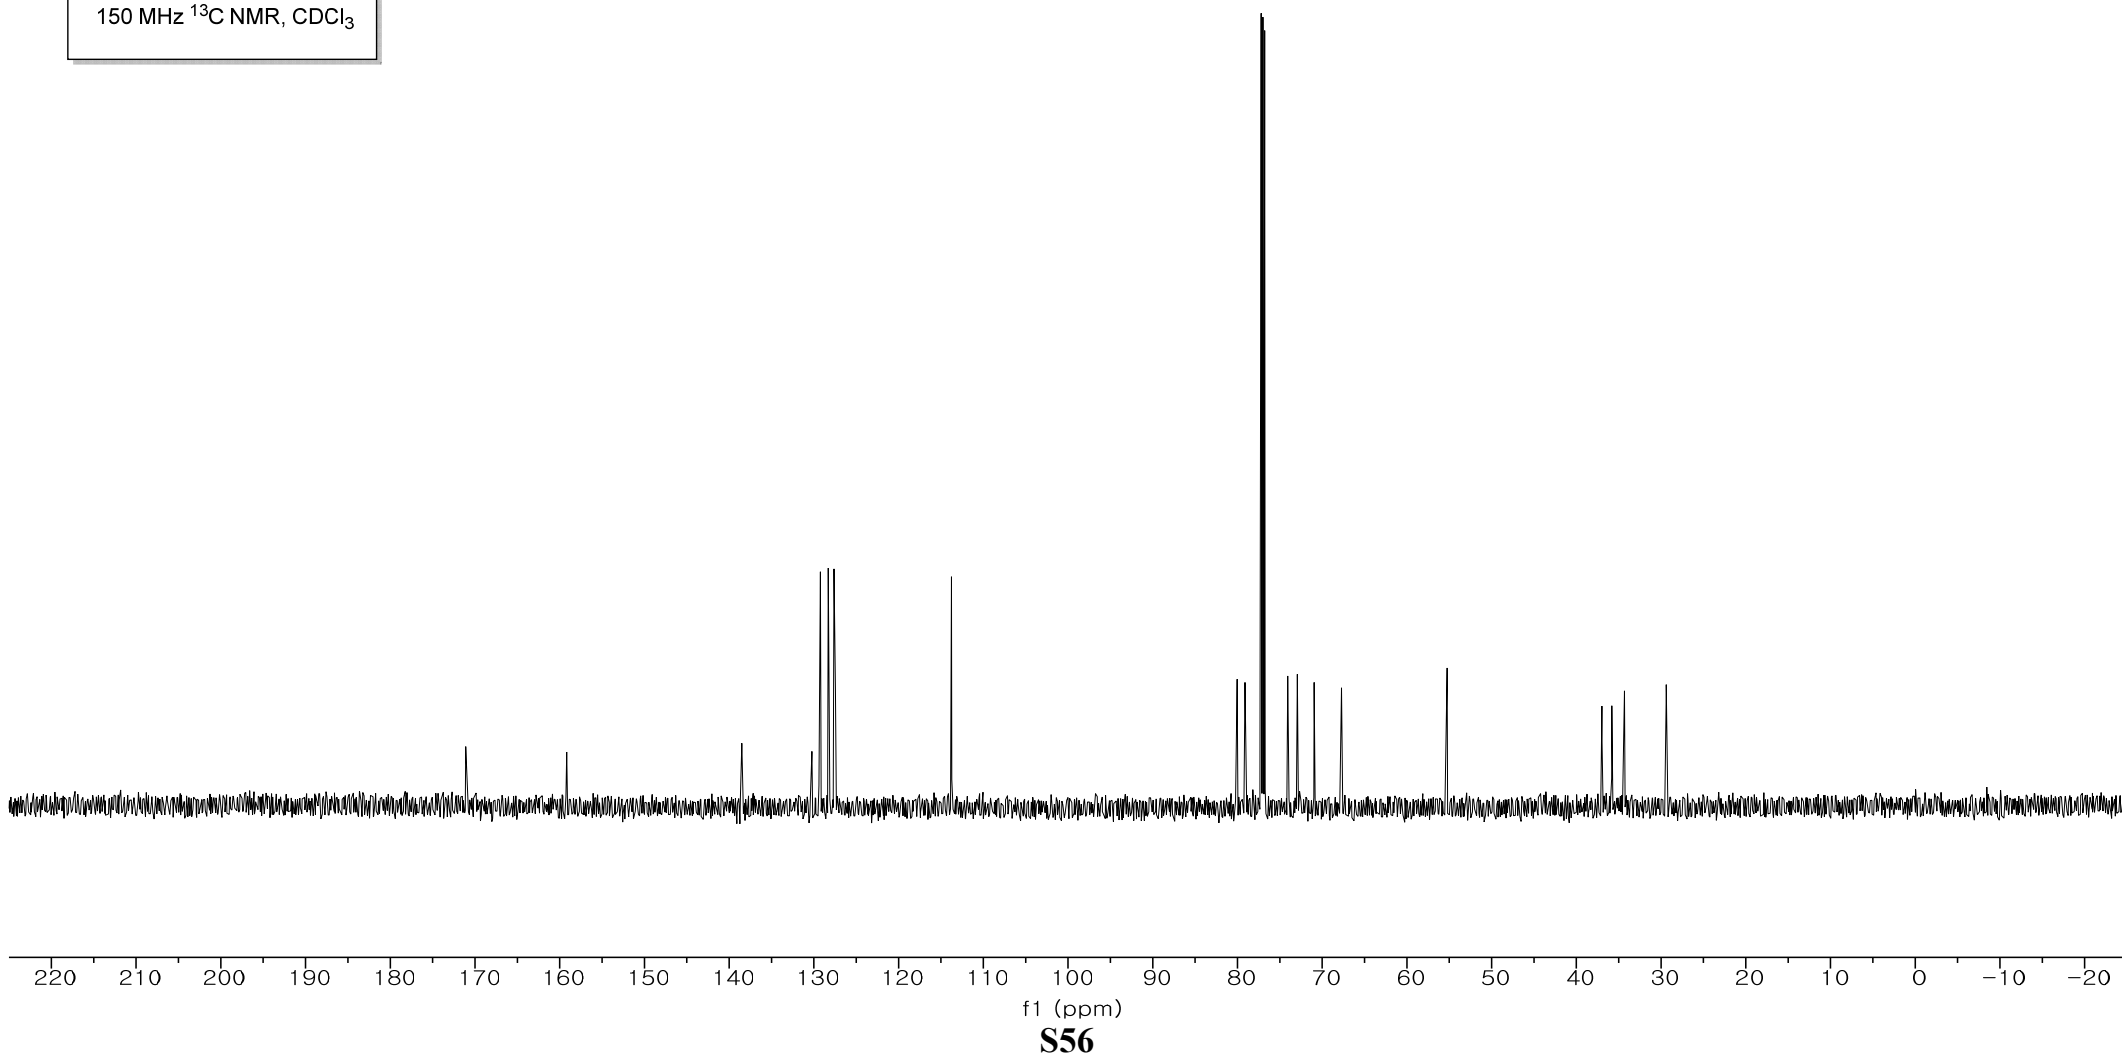



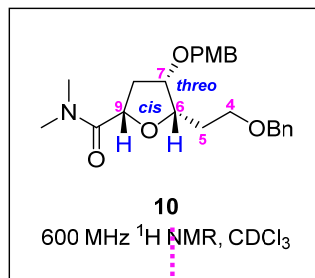

In comparison the spectra of the crude **10** with that of the authentic *trans* isomer **17**, no peaks corresponding to the **17** were found, so the selectivity was determined as *cis only*.

HK-XII-23F\_IAEA\_ELATENYNE  
single\_pulse

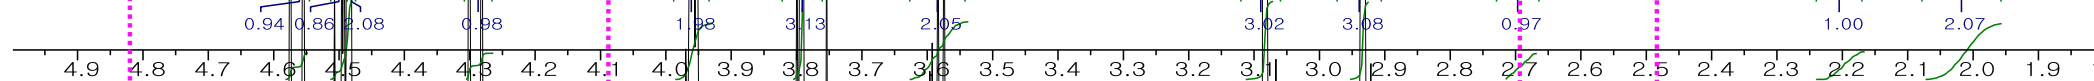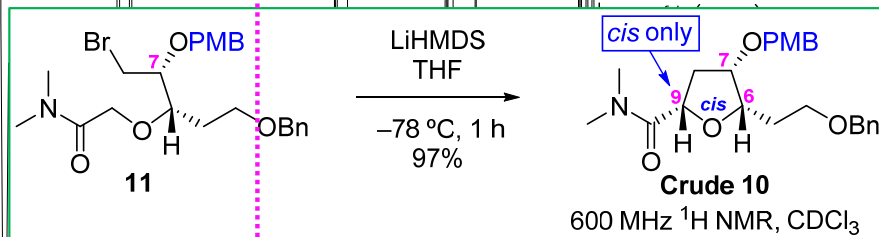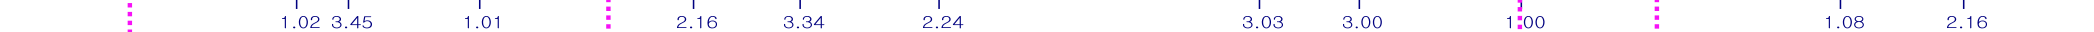

trans\_IAEA  
single\_pulse

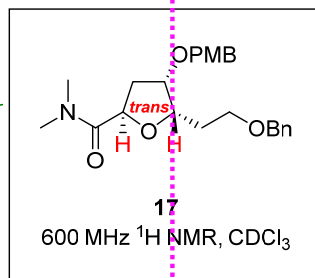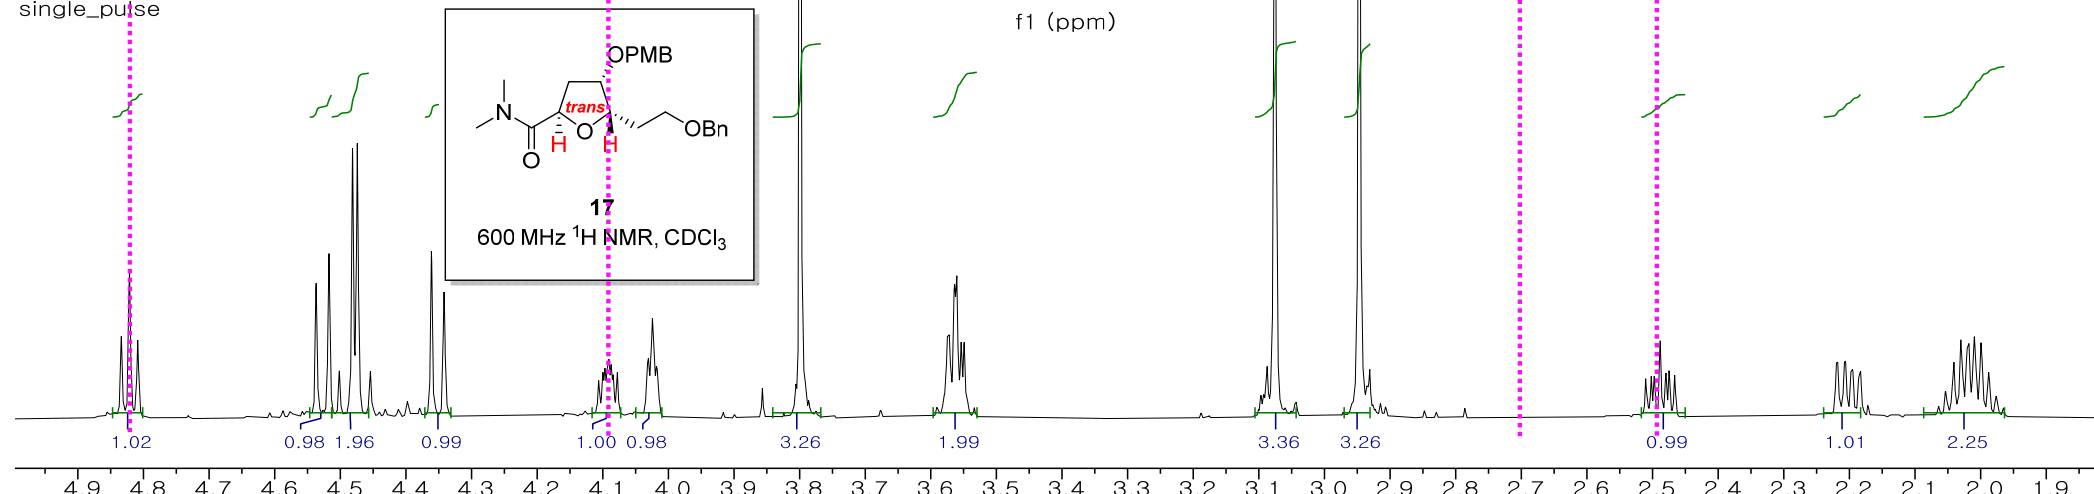

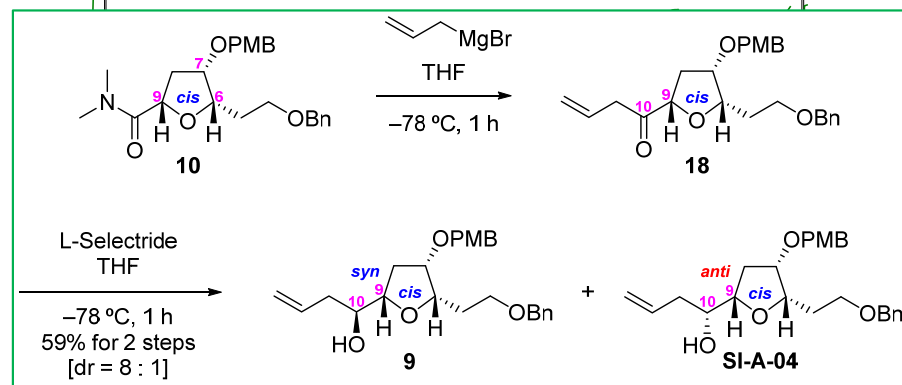

1. [ ] [ ] [ ]

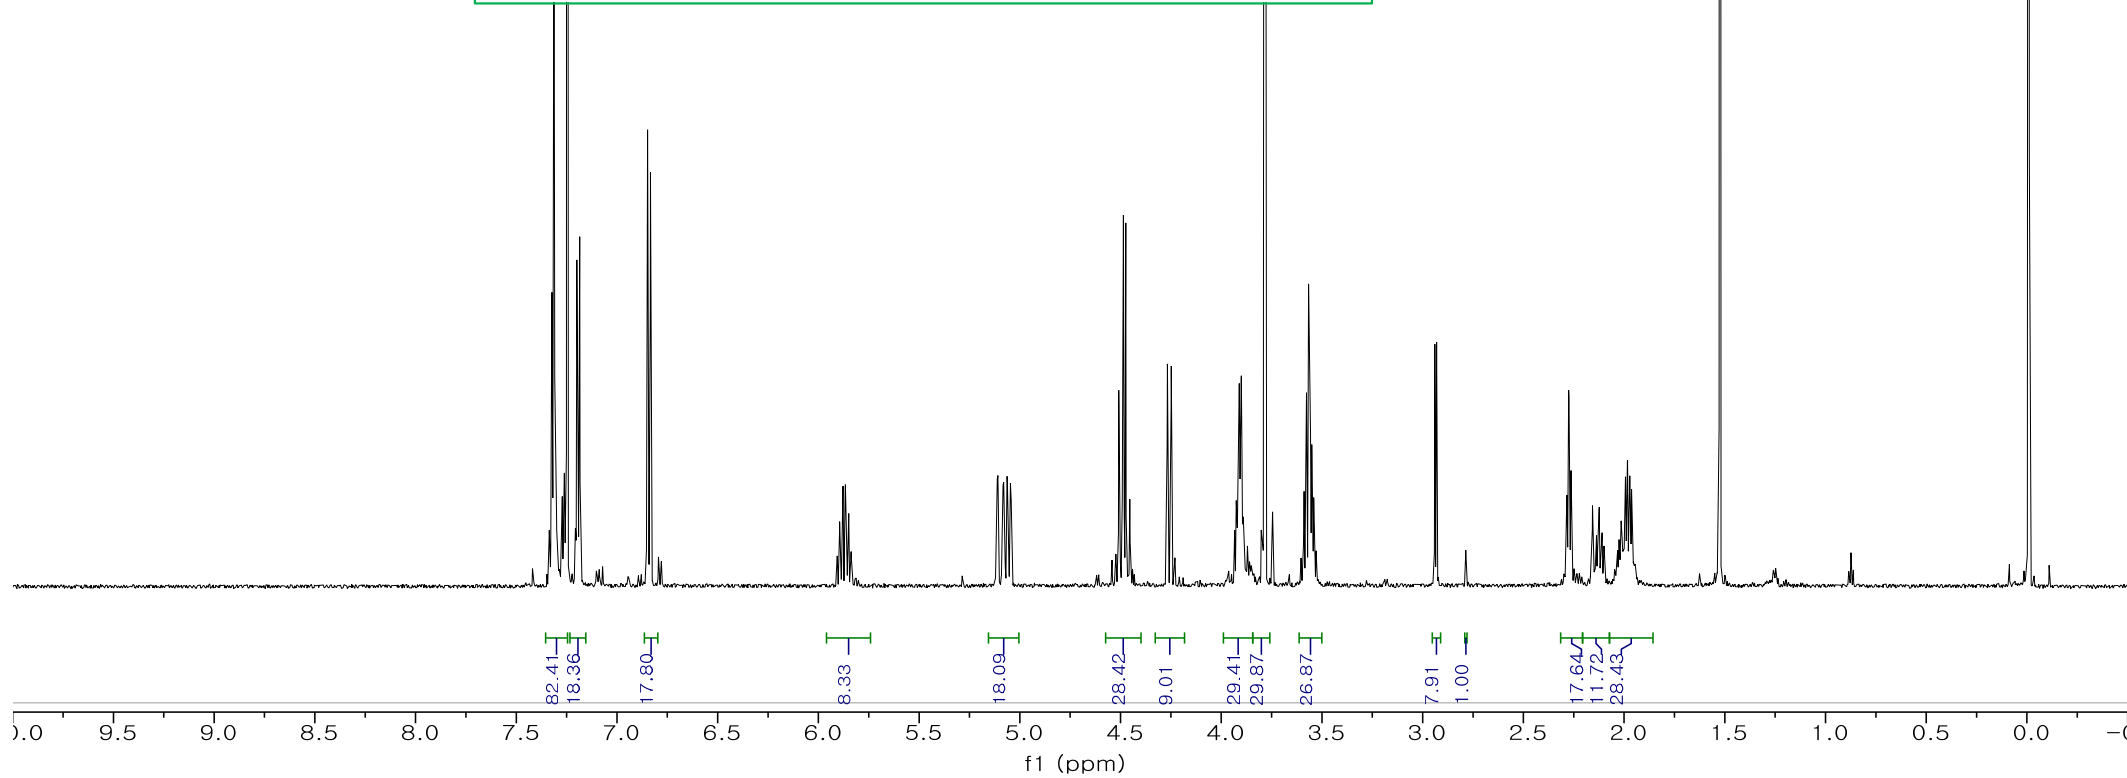

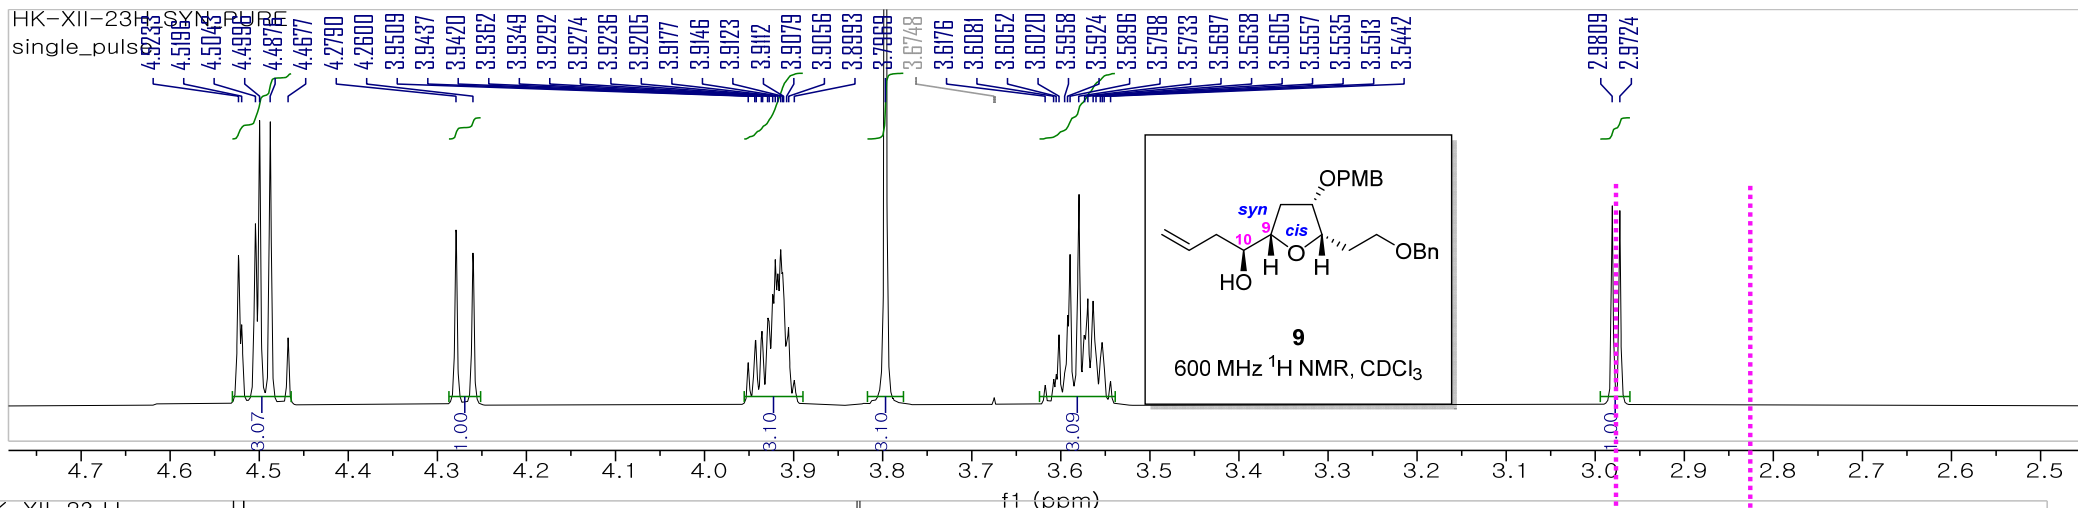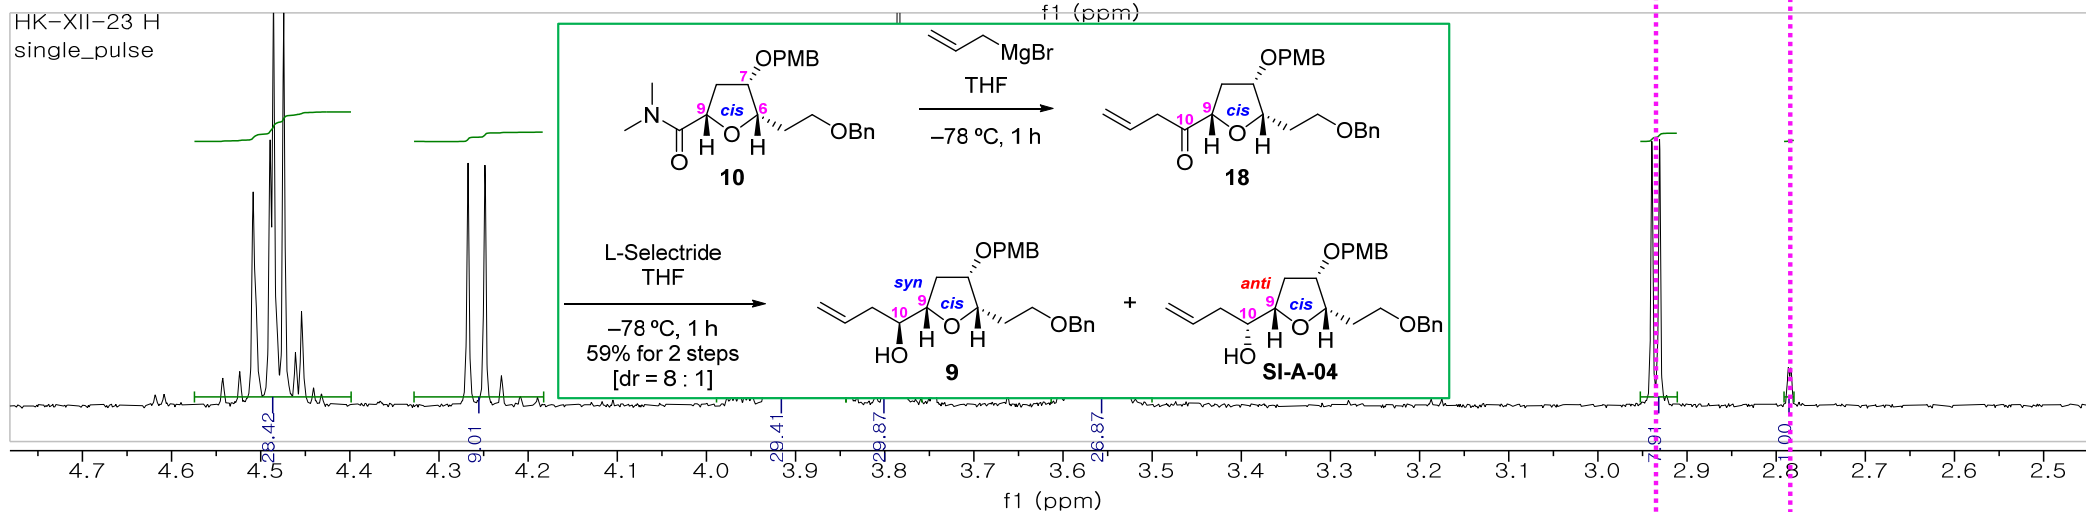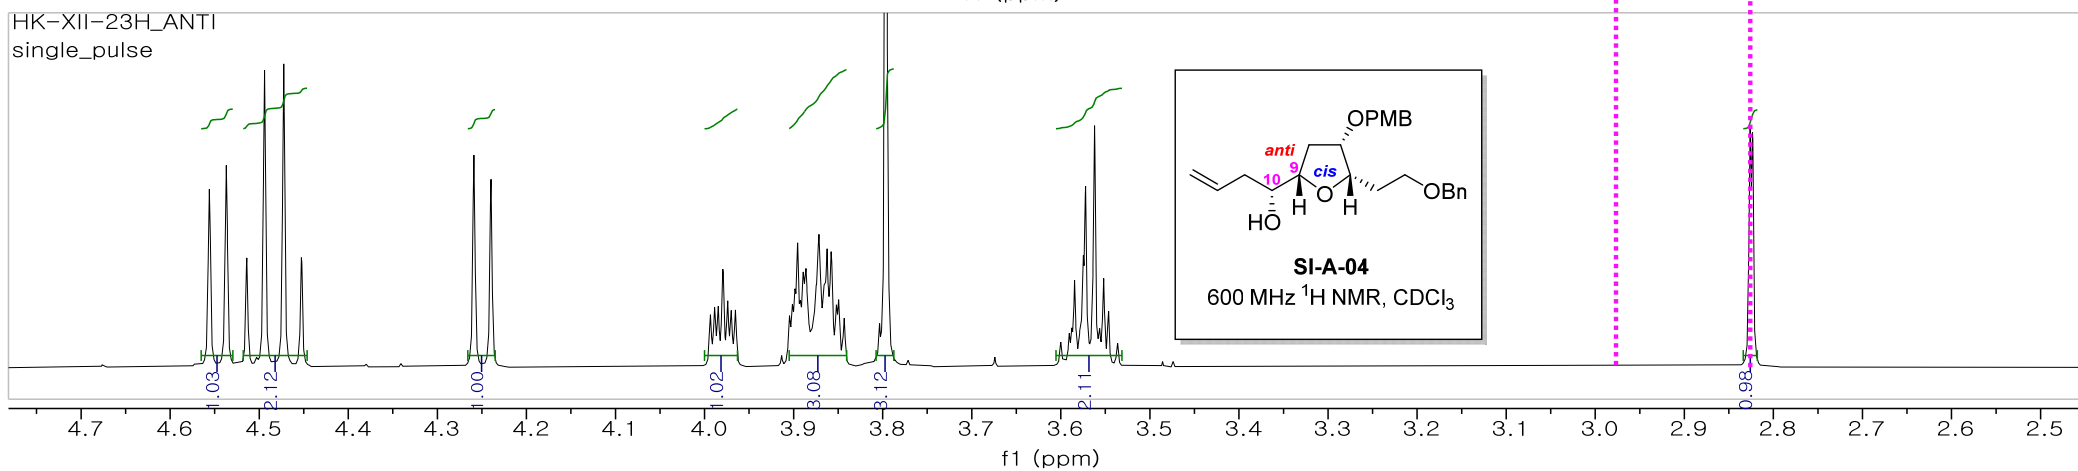

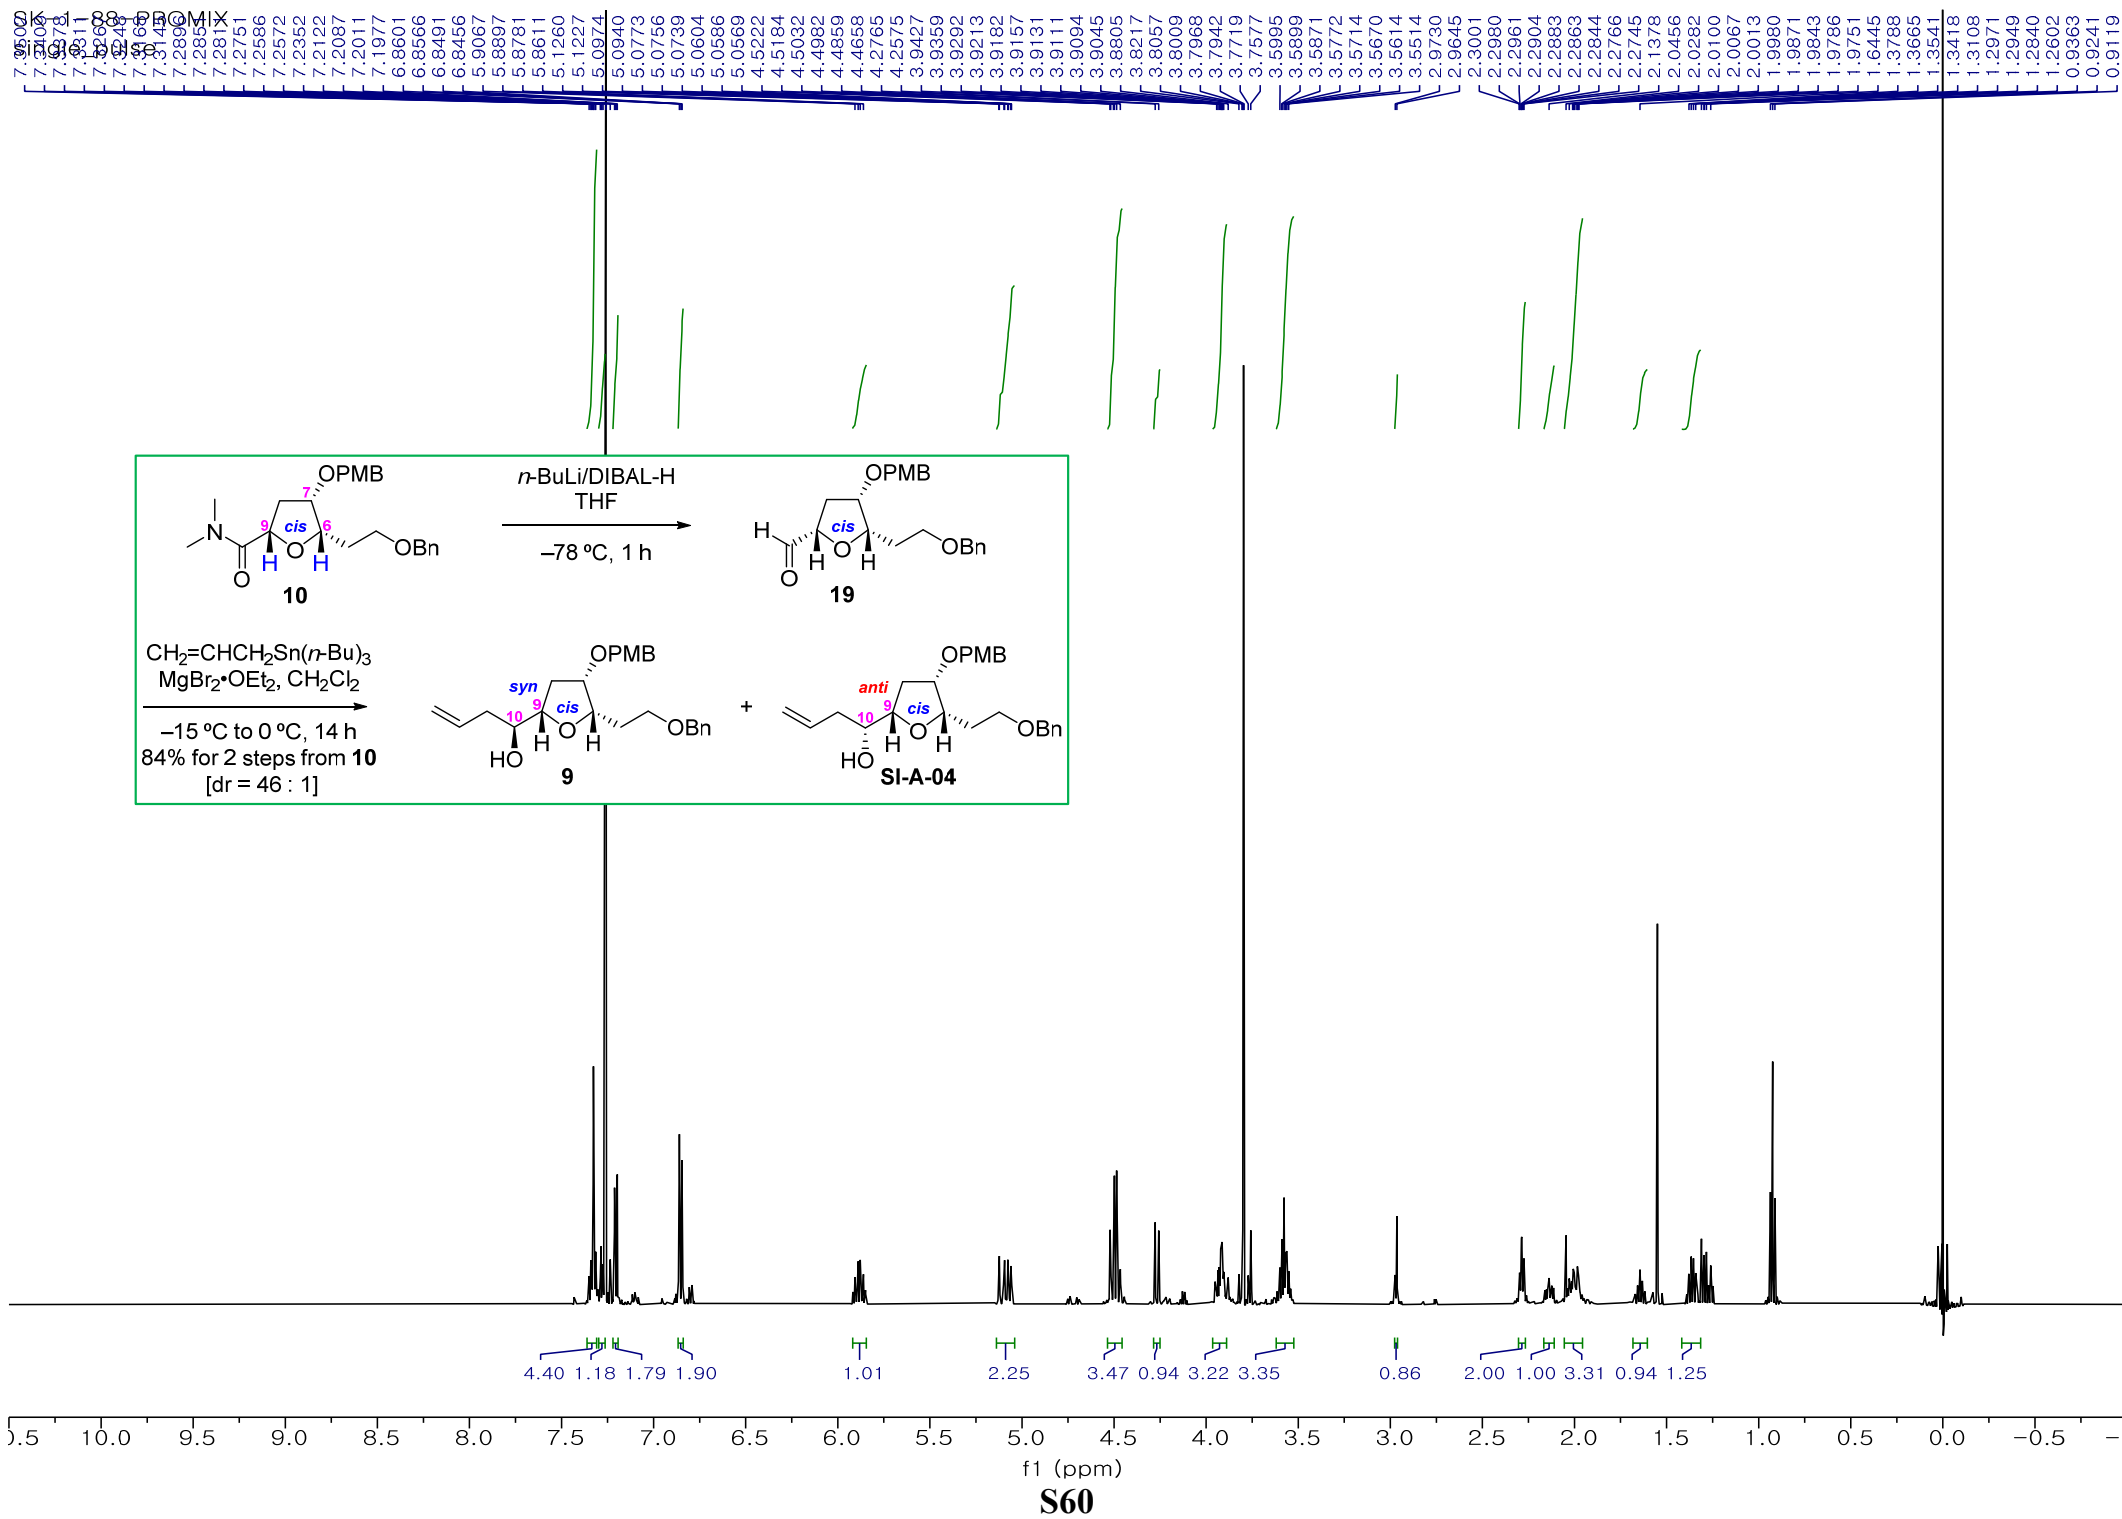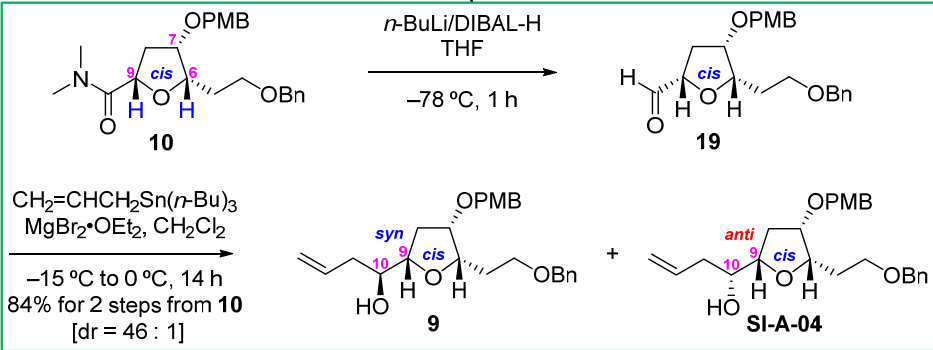



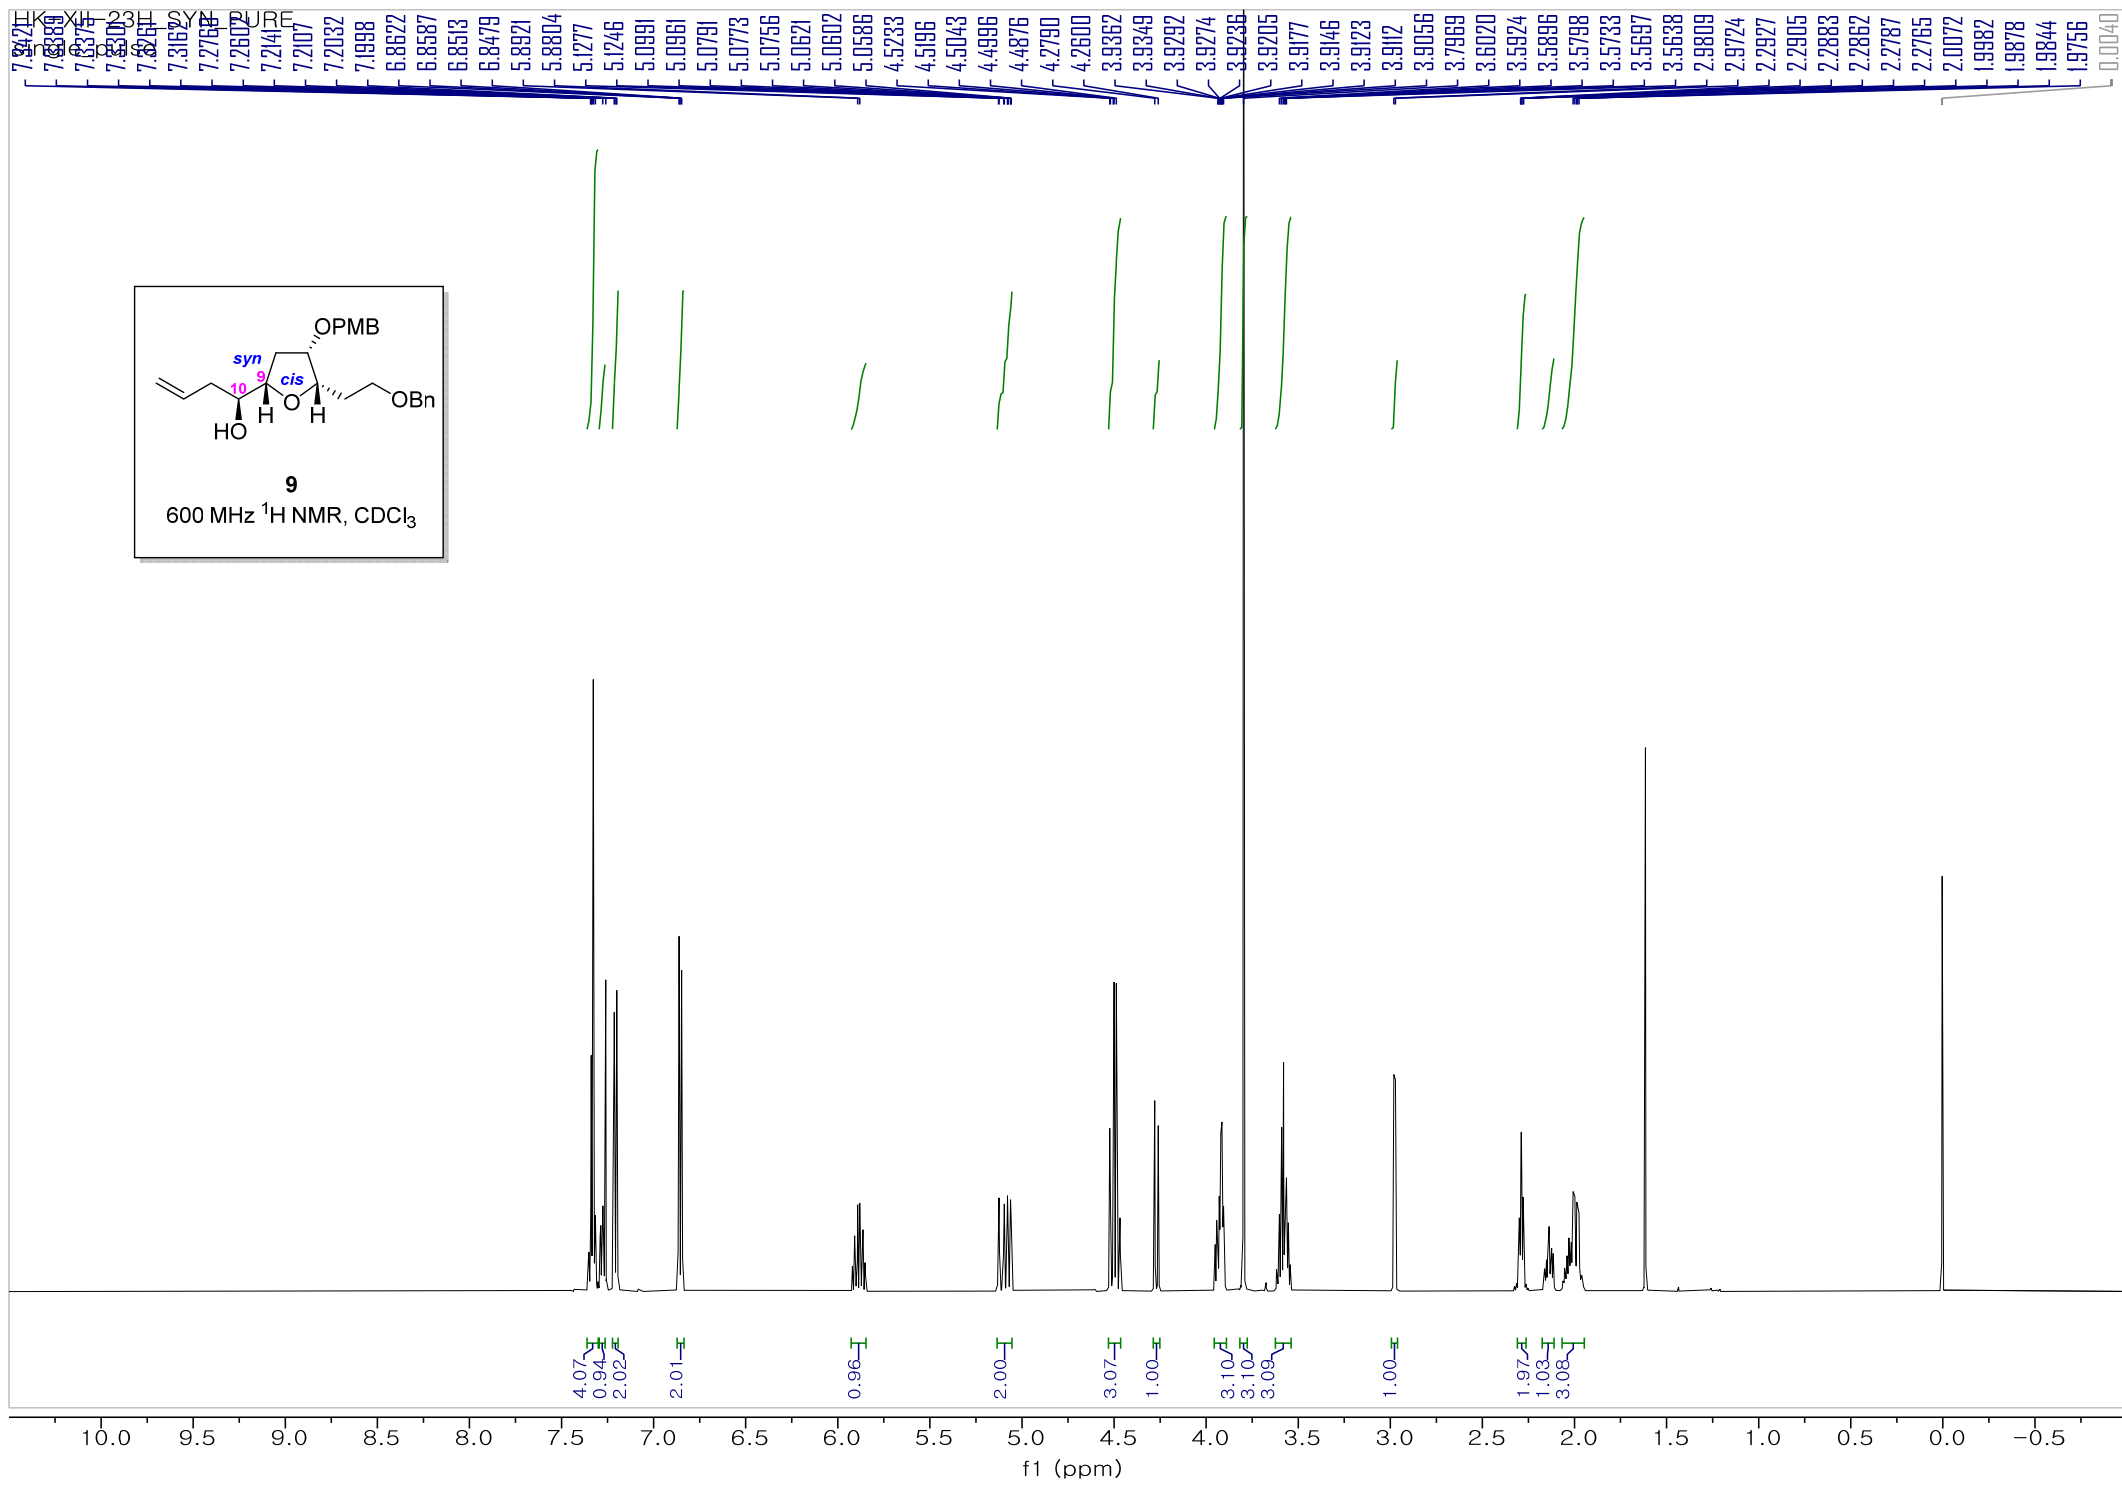

SK-3-61  
single pulse decoupled gated NOE

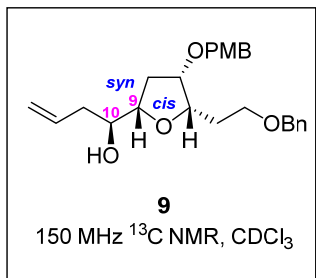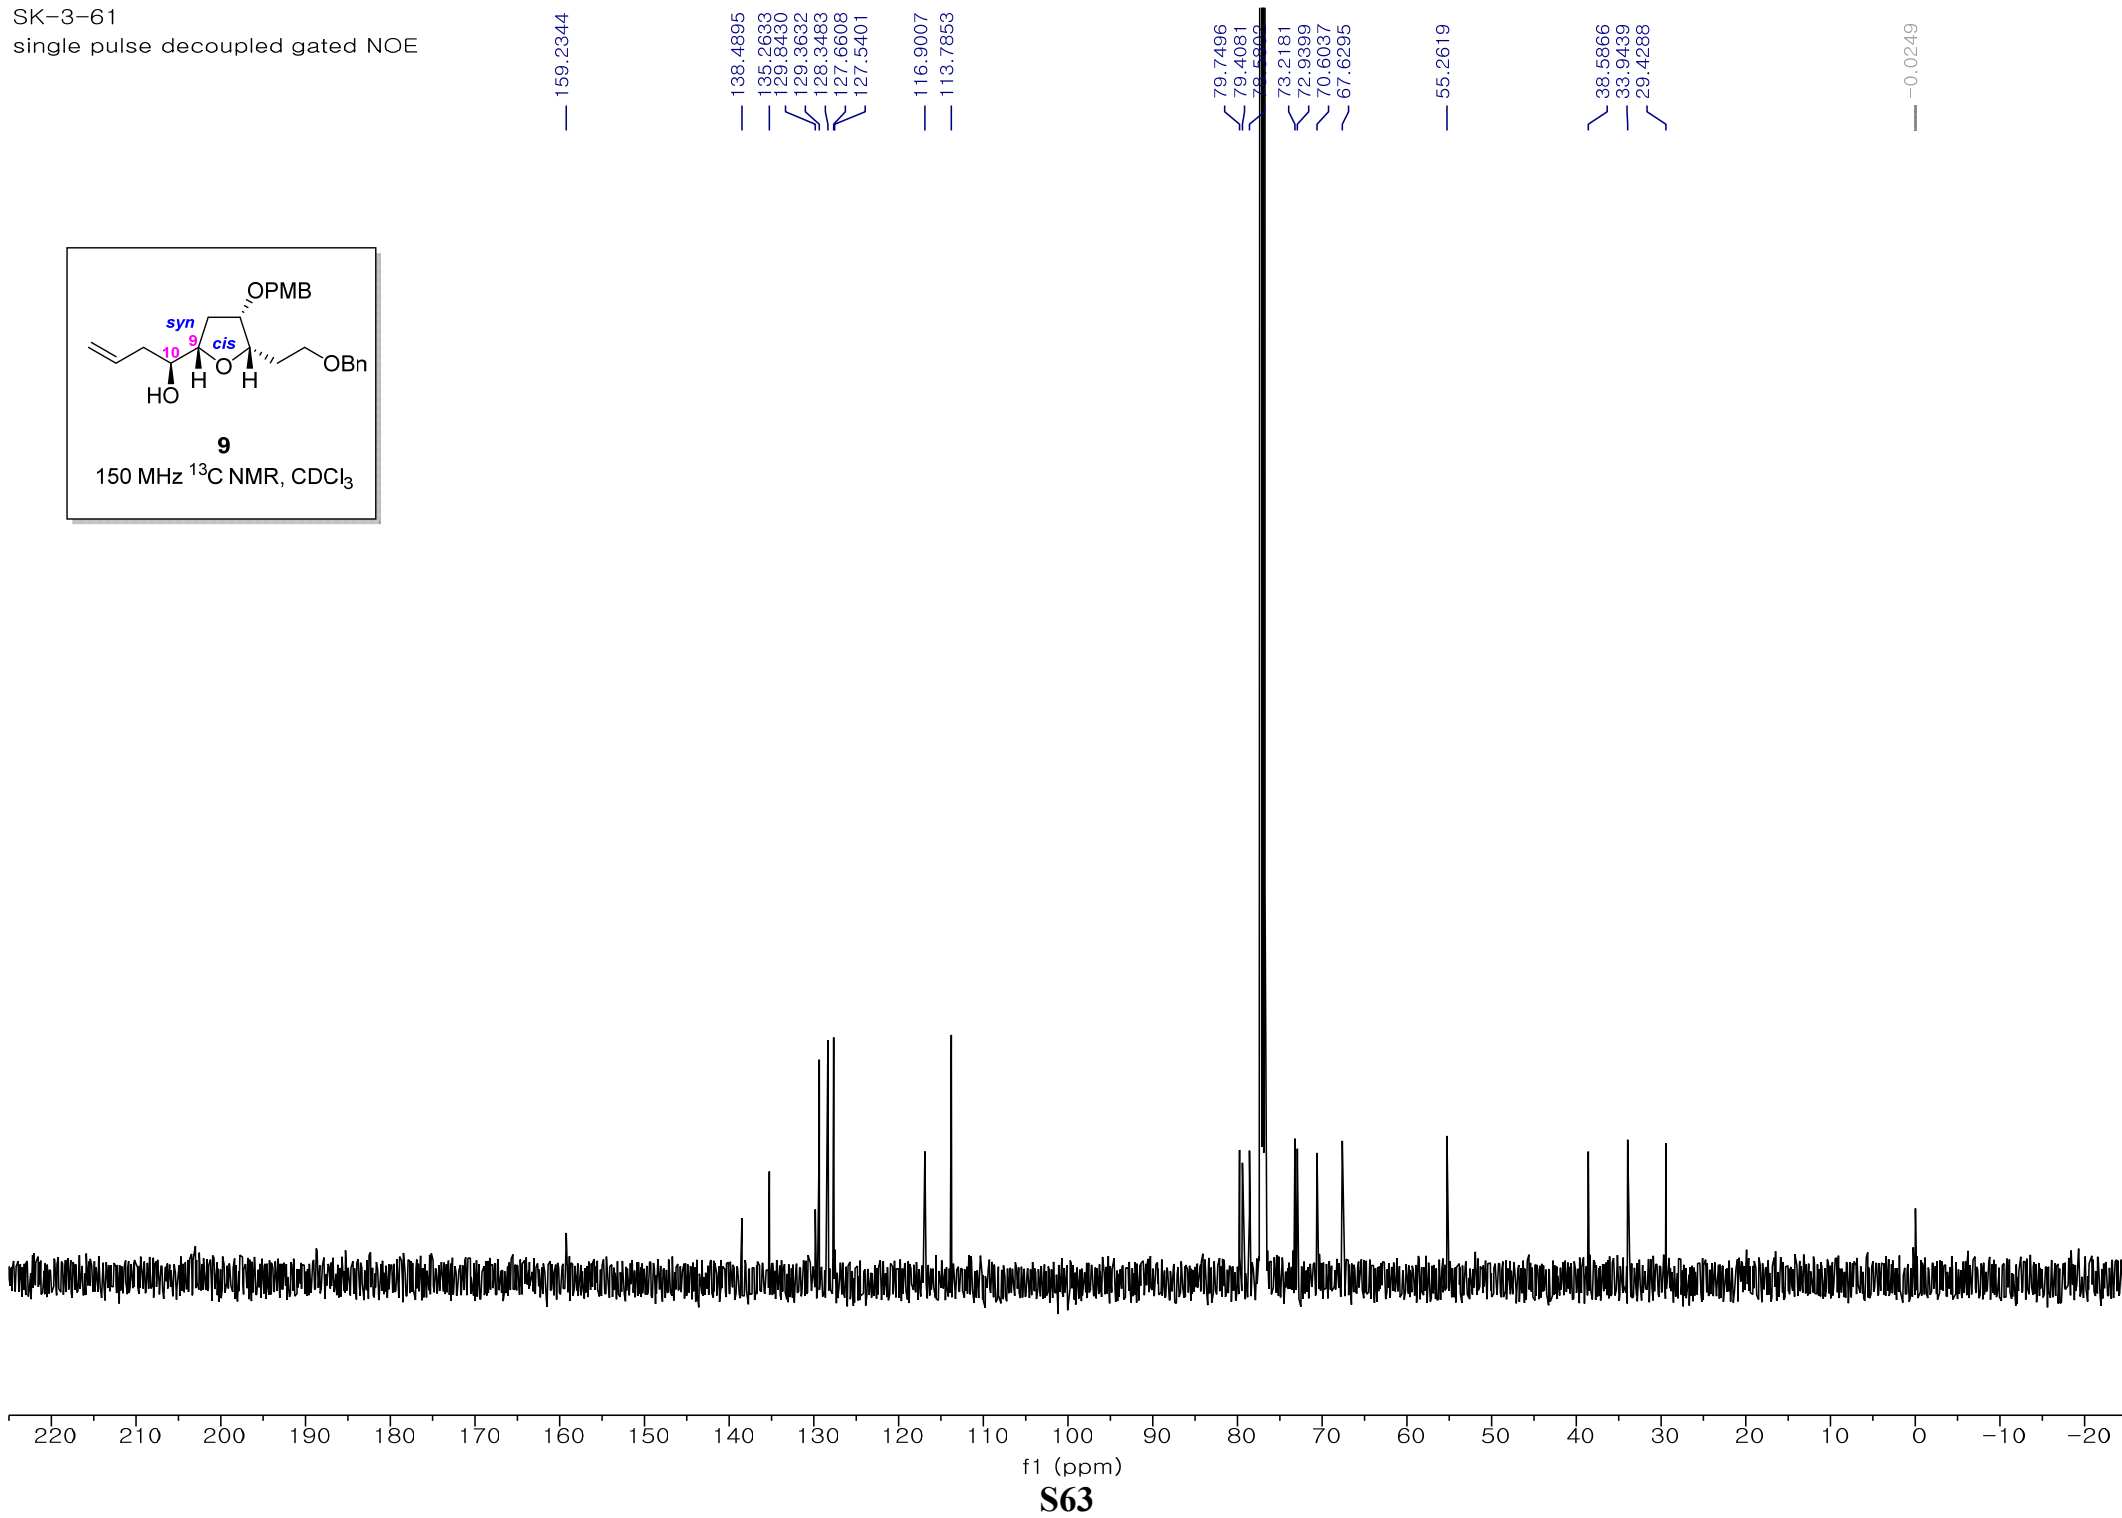





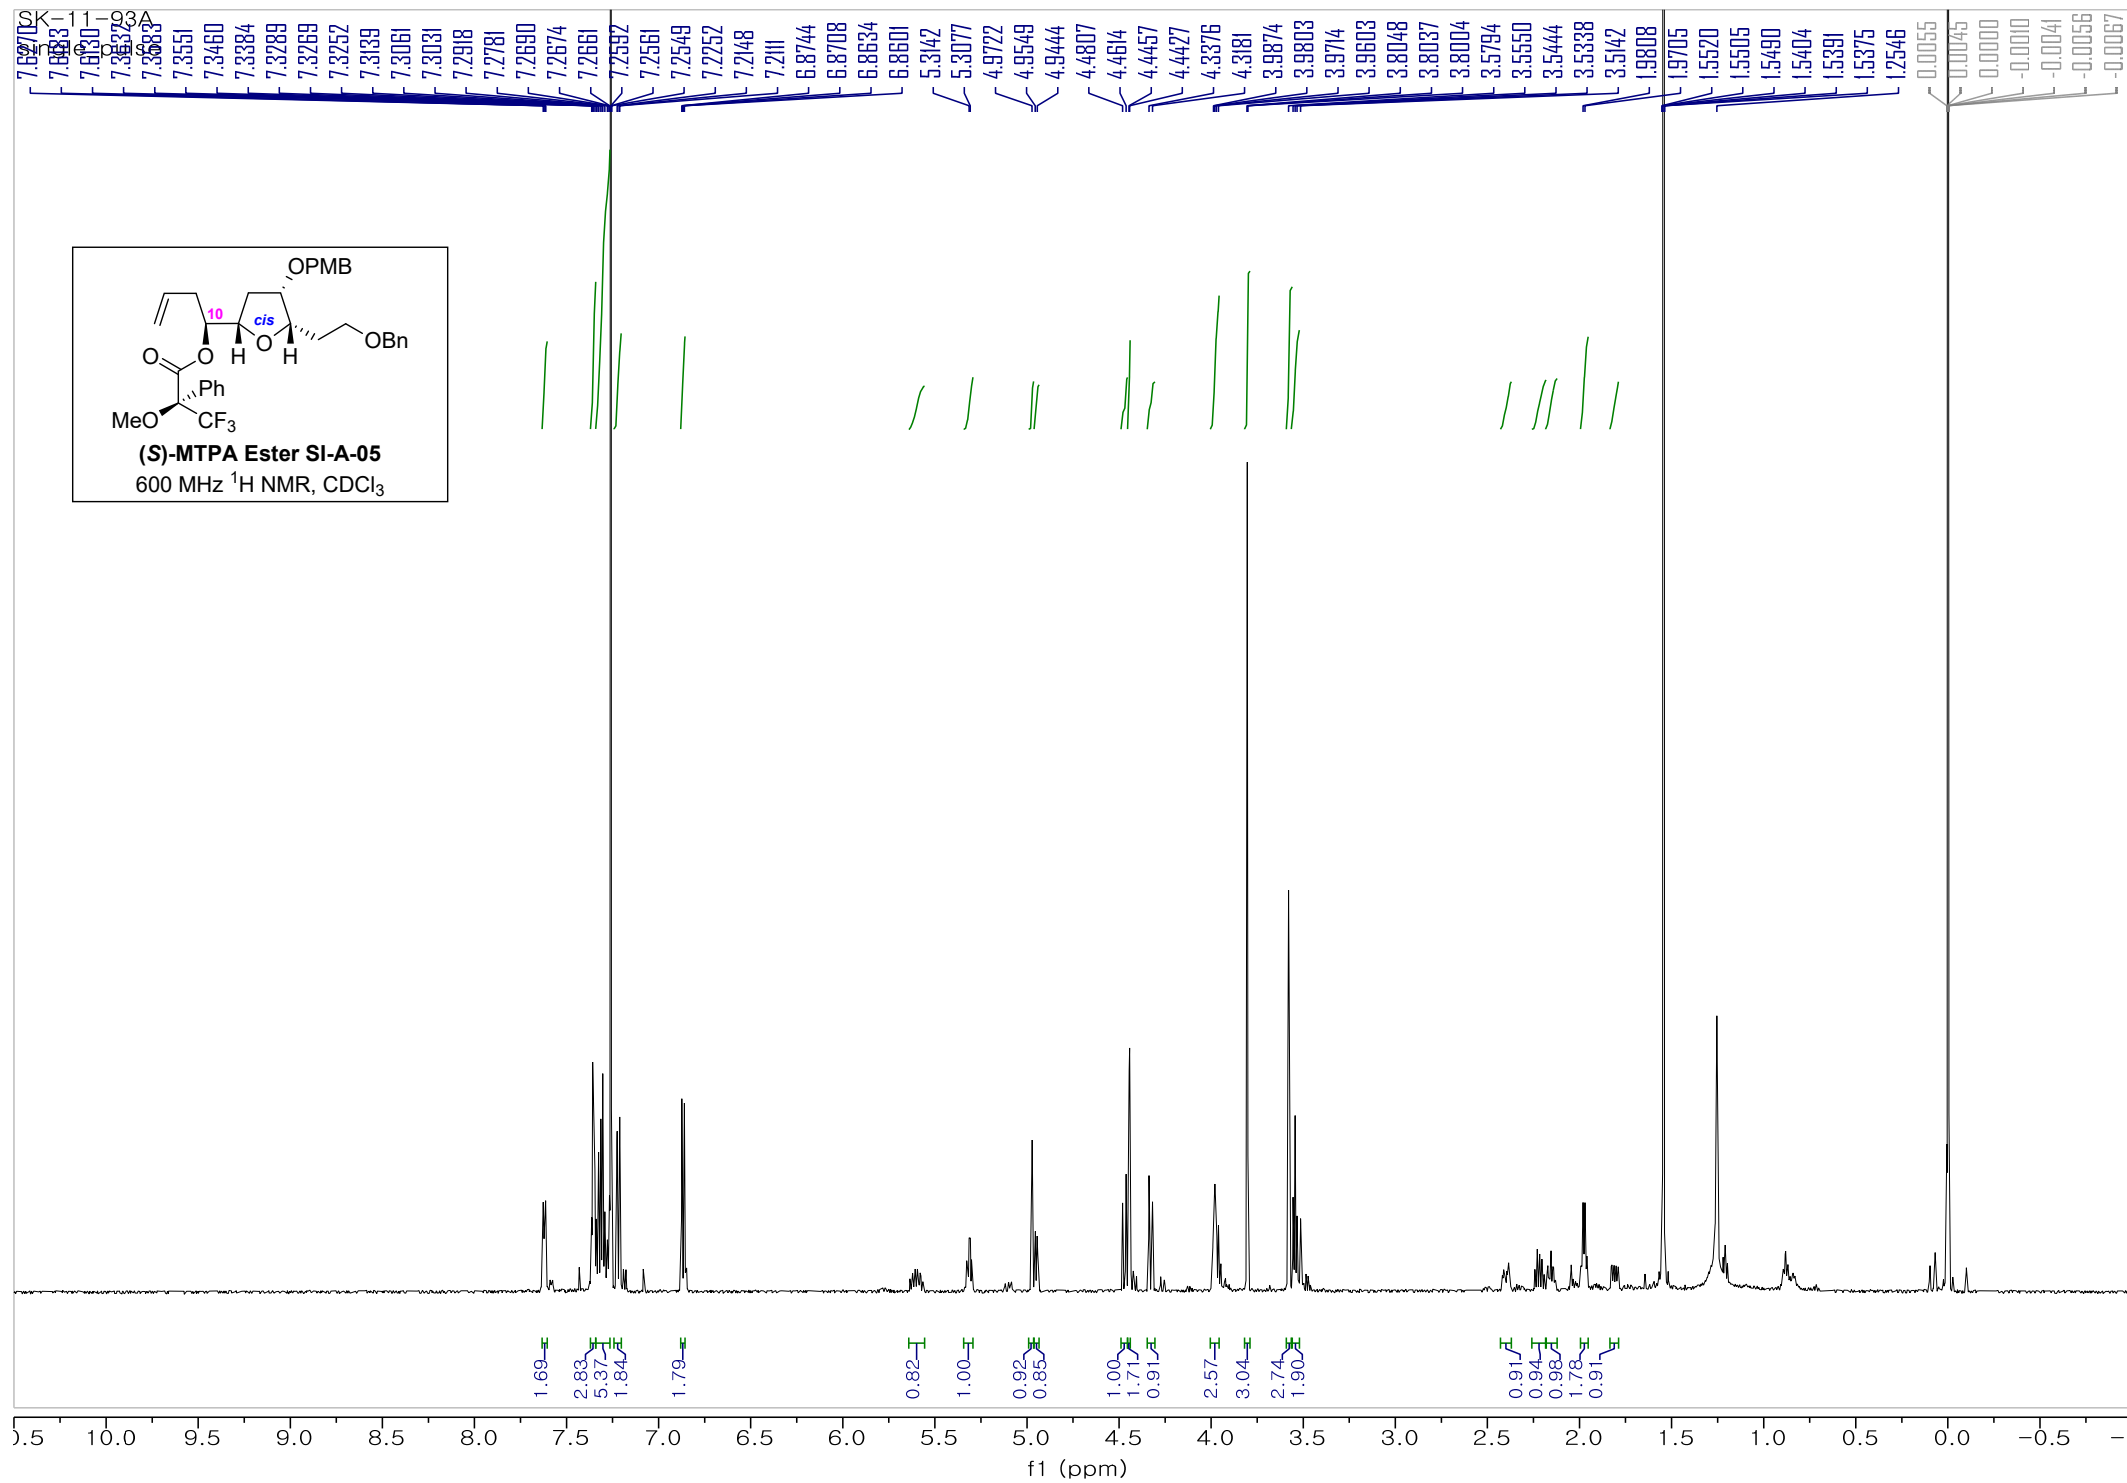

f1 (ppm)

S65

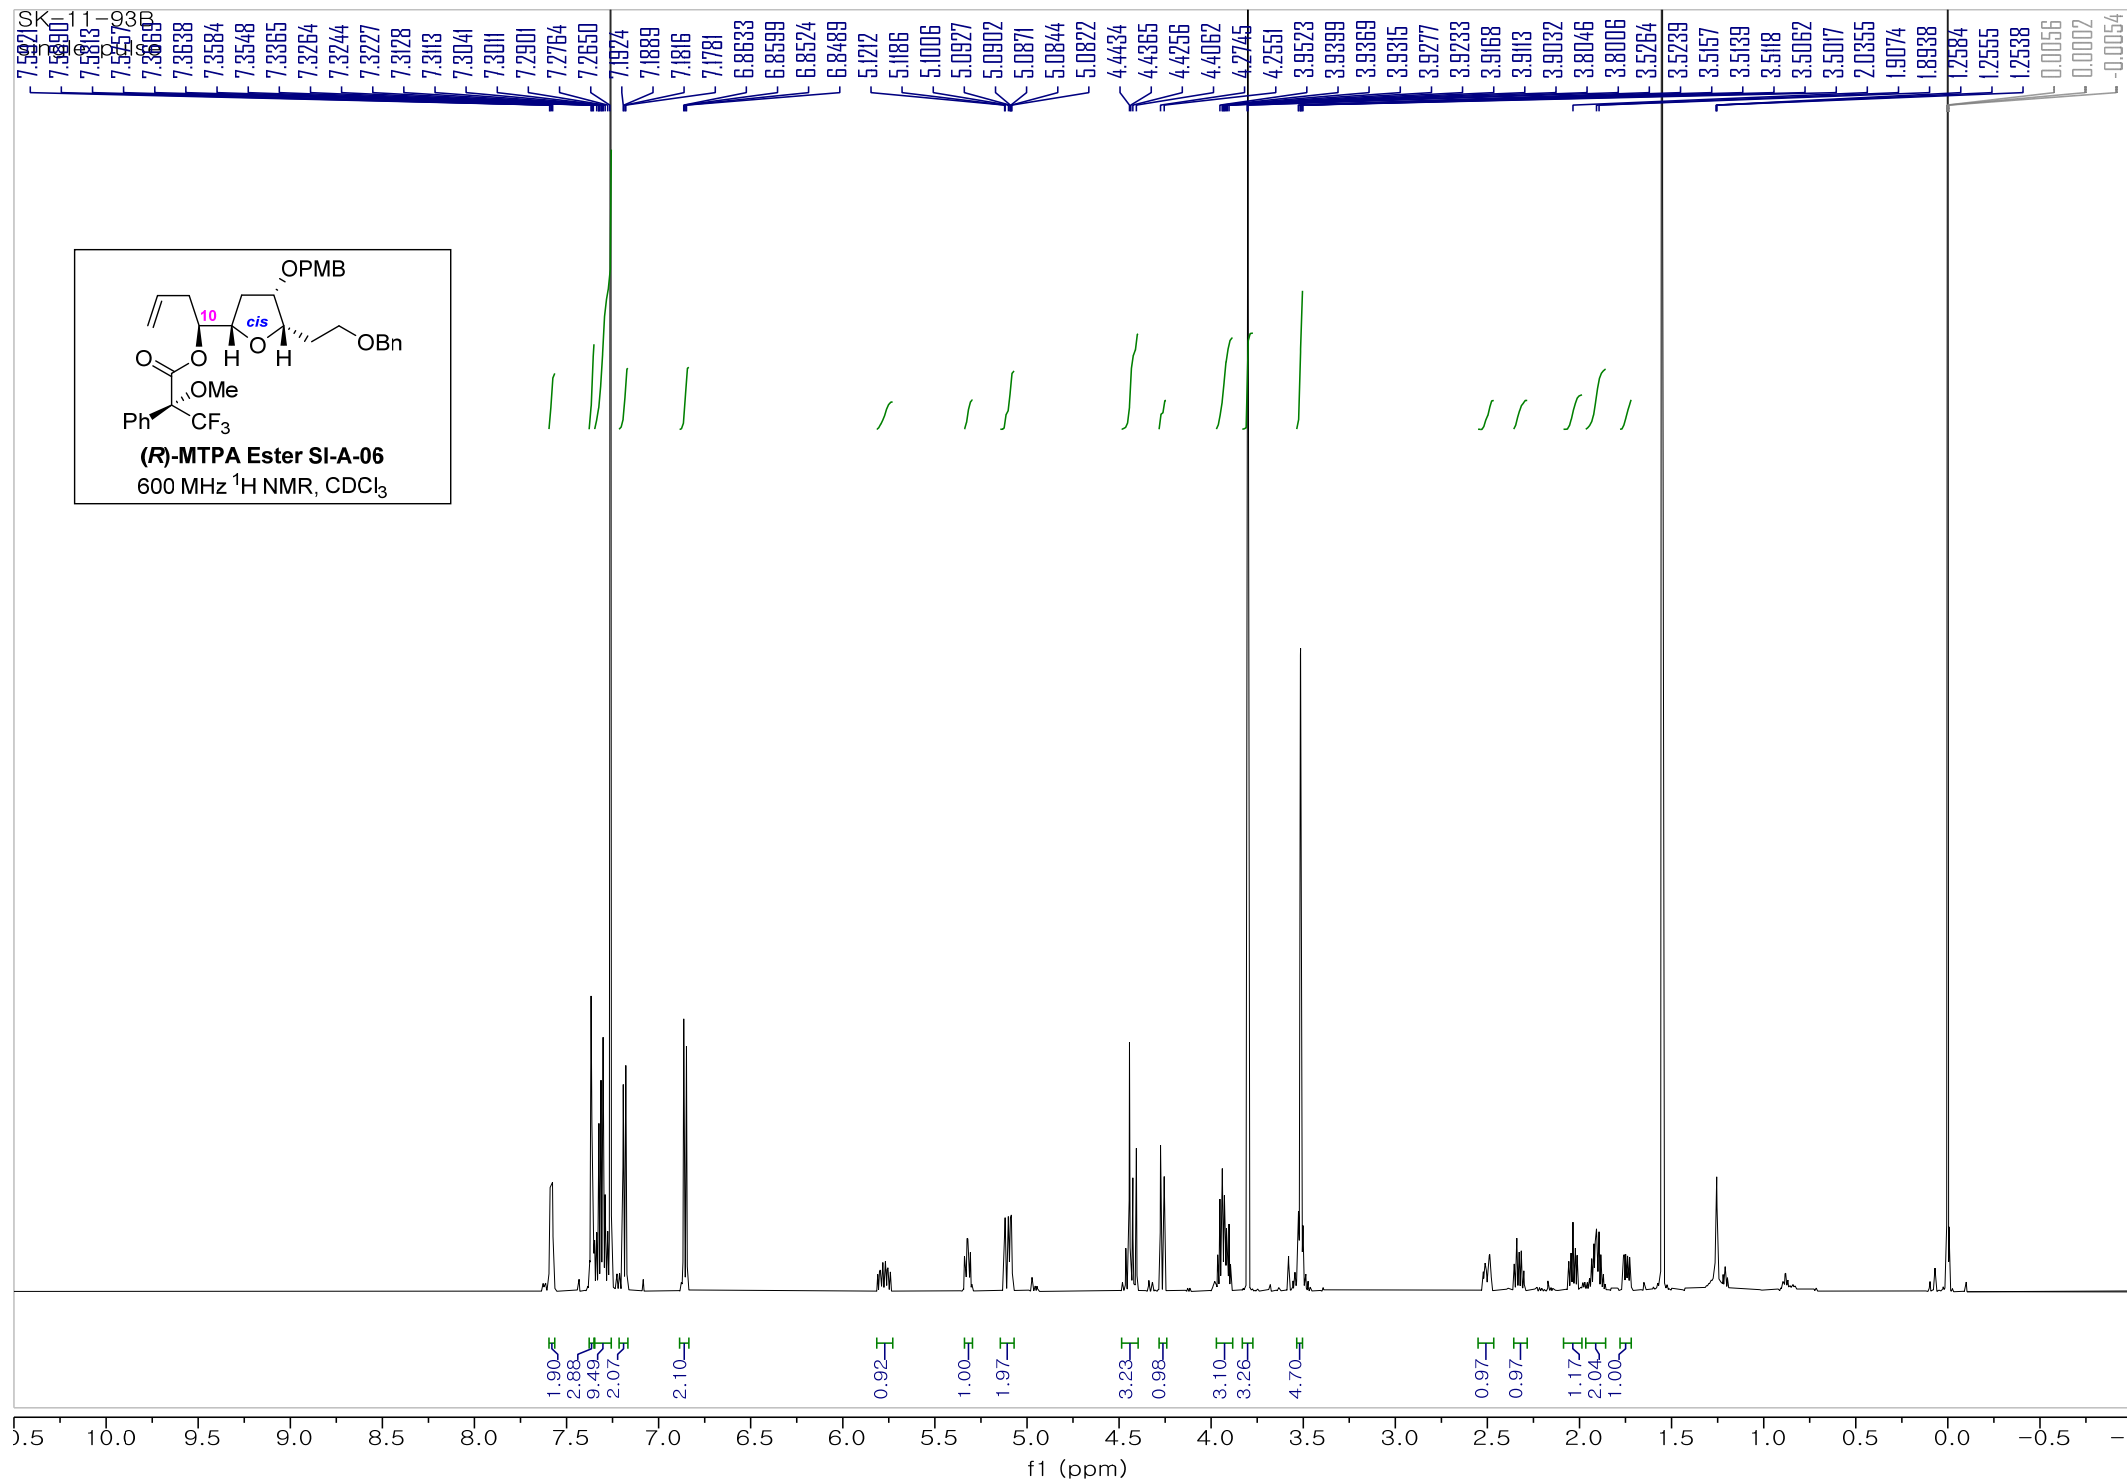

f1 (ppm)

S66

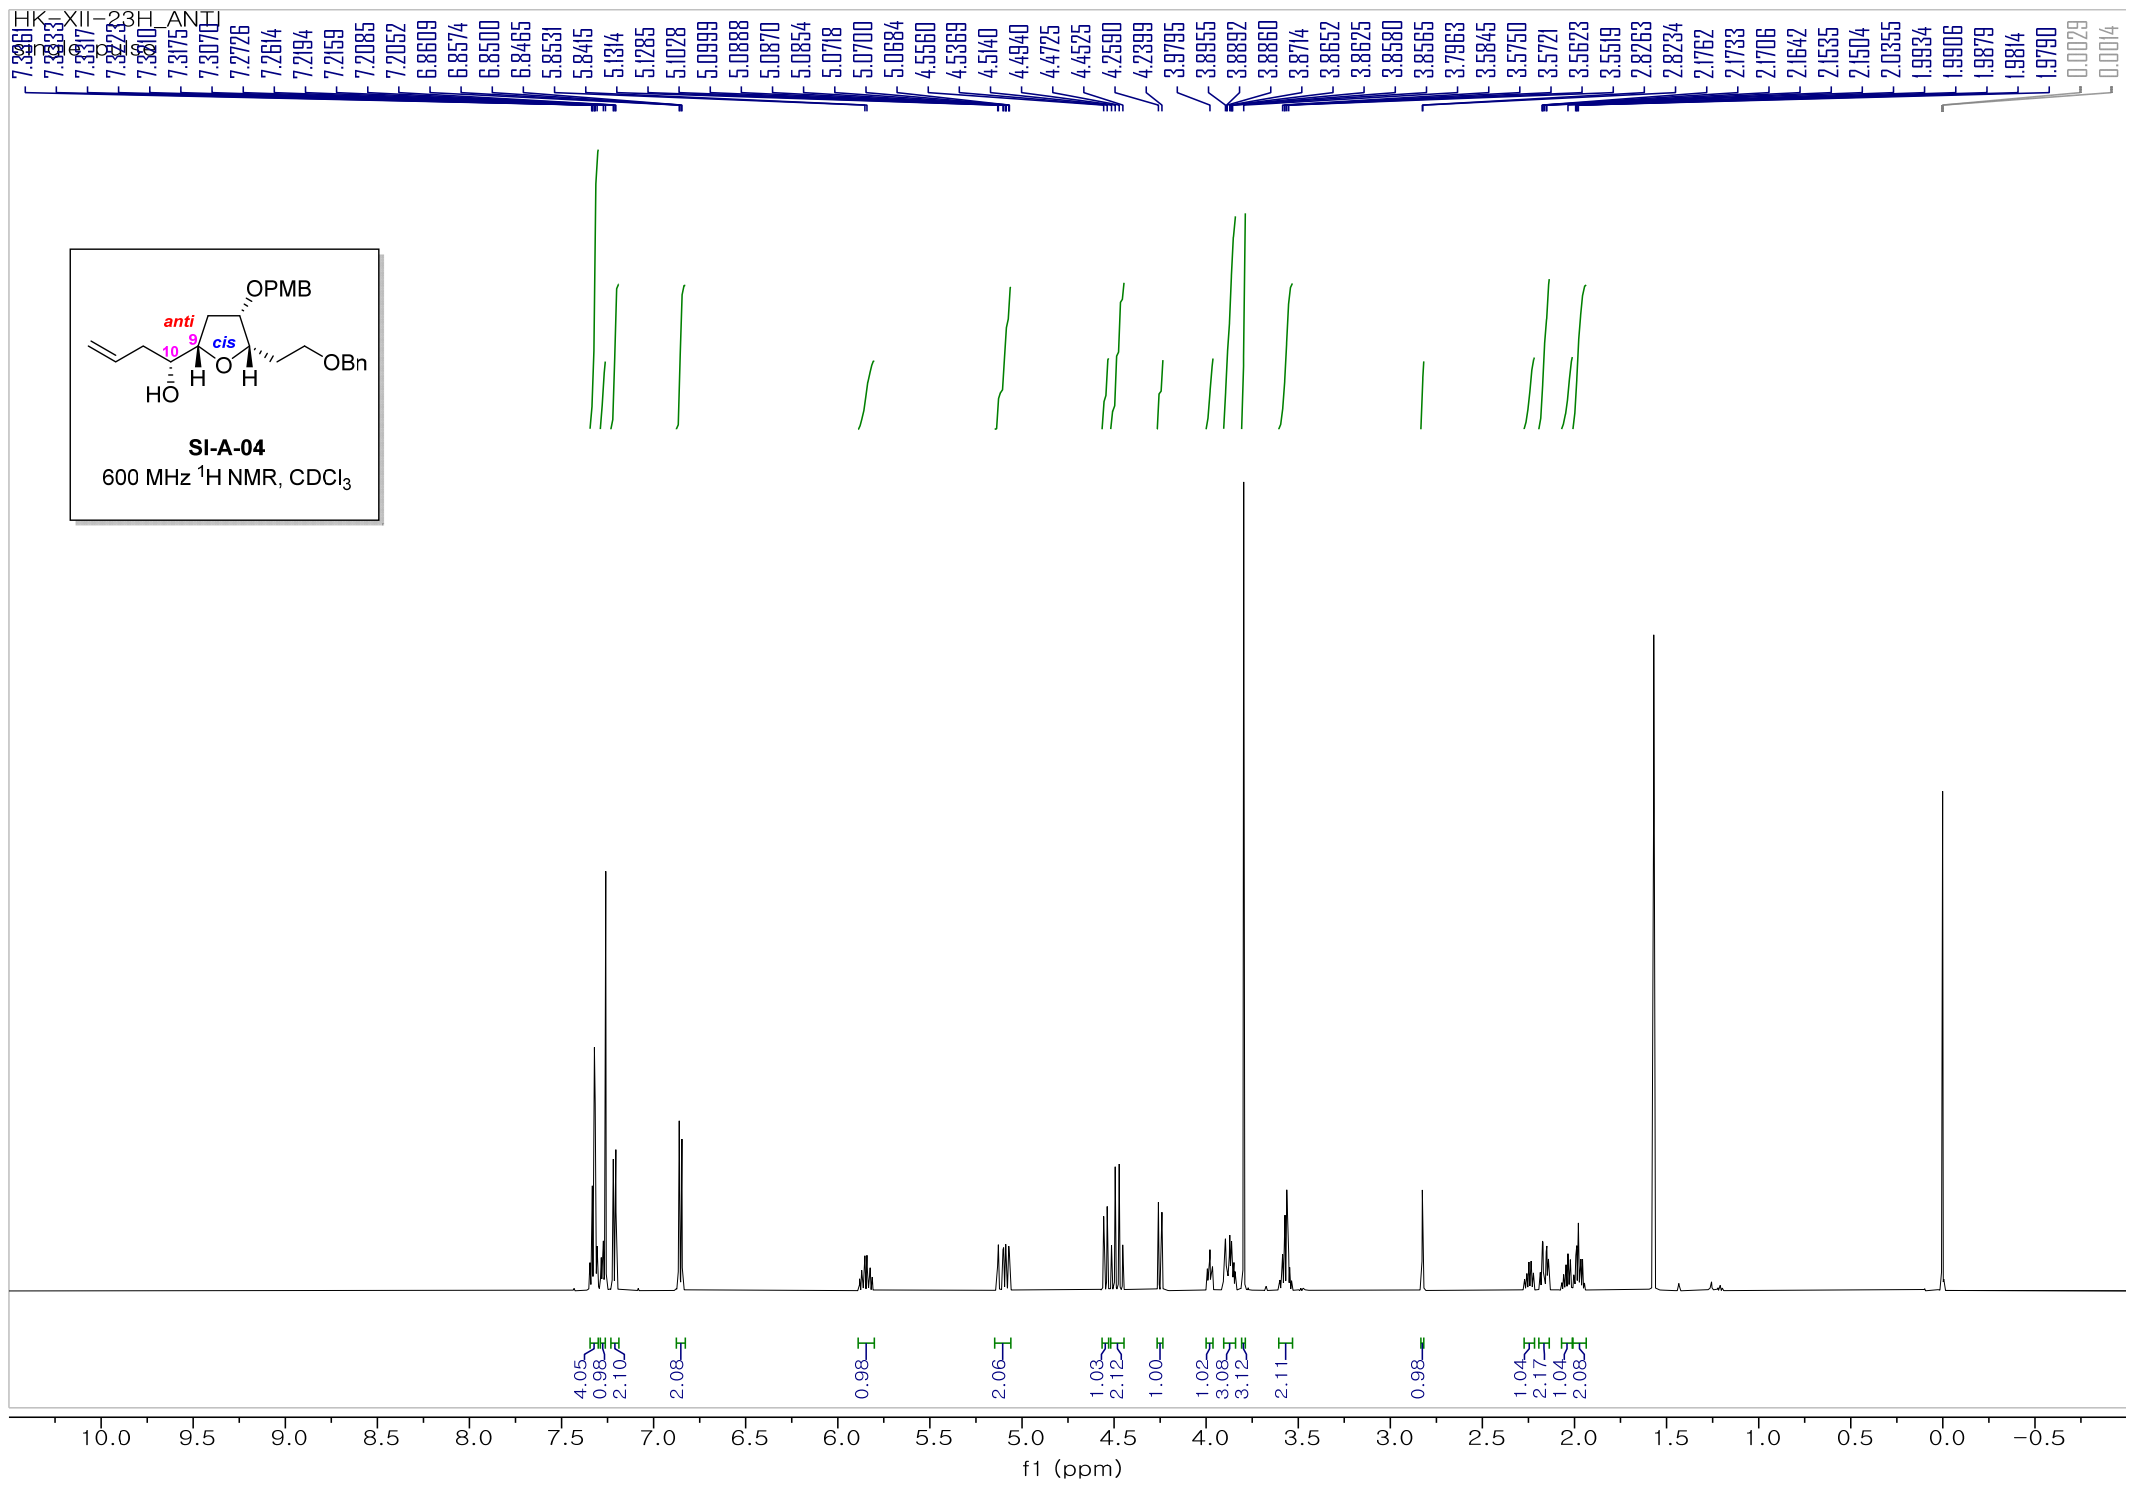

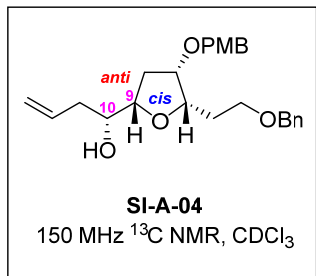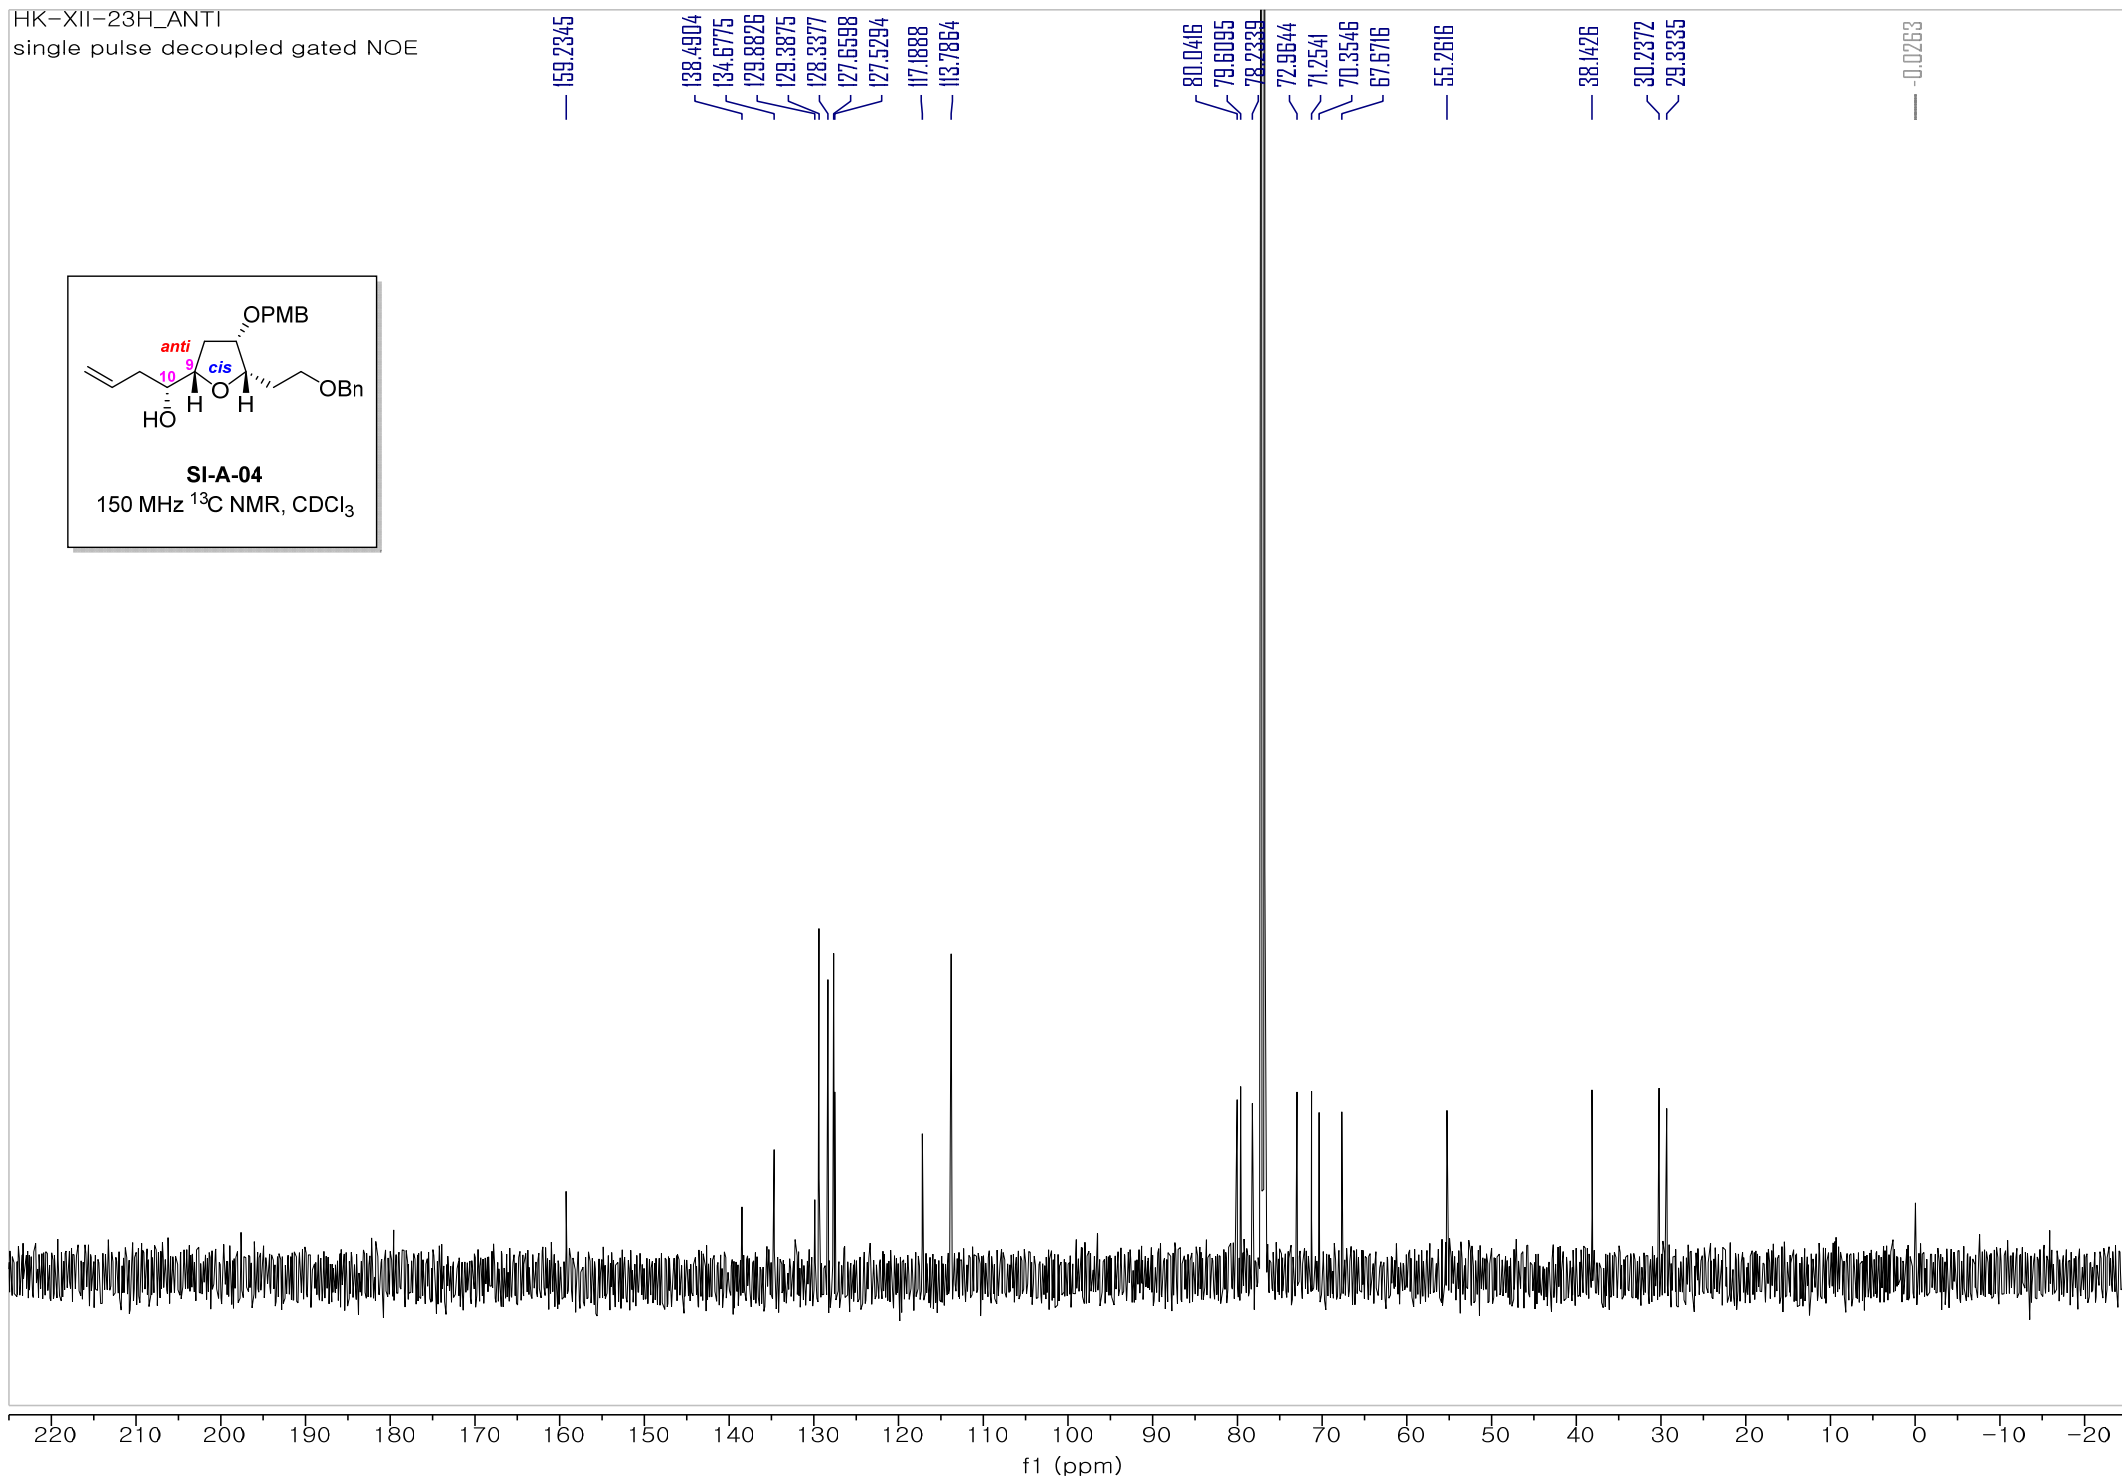

7.3071  
7.3044  
7.3016  
7.2986  
7.2956  
7.2926  
7.2894  
7.2866  
7.2798  
7.2749  
7.2645  
7.2128  
7.2018  
7.1987  
6.8603  
6.8592  
6.8564  
6.8491  
6.8456  
5.5434  
5.5418  
5.4772  
5.4755  
4.5195  
4.5012  
4.4983  
4.4848  
4.4648  
4.2744  
4.2554  
3.9293  
3.9235  
3.9208  
3.9147  
3.9090  
3.9020  
3.7963  
3.6005  
3.5938  
3.5911  
3.5881  
3.5780  
3.5677  
3.5212  
3.5188  
3.5176  
3.5105  
3.5032  
3.5020  
3.4995  
2.9428  
2.9410  
2.9387  
2.9327  
2.9301  
2.9301  
2.2315  
2.2297  
2.2279  
2.2206  
2.2188  
2.2170  
2.2093  
2.2075  
2.2057  
2.2057  
2.1294  
2.1153  
2.0505  
2.0490  
2.0466  
2.0397  
2.0379  
2.0361  
2.0342  
2.0261  
2.0239  
2.0218  
2.0134  
2.0028  
2.0011  
1.9942  
1.9914  
1.9828  
1.9786  
1.9717  
1.9690  
1.9631  
1.9597  
1.5792  
1.5753  
0.9875  
0.9861  
0.9750  
0.9736  
0.9693  
0.9679  
0.9625  
0.9611  
0.9568  
0.9554  
0.0034  
0.0017  
0.0004

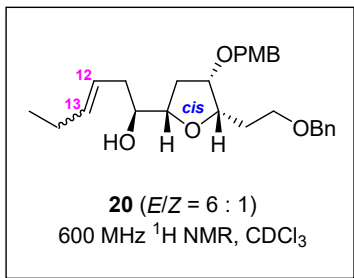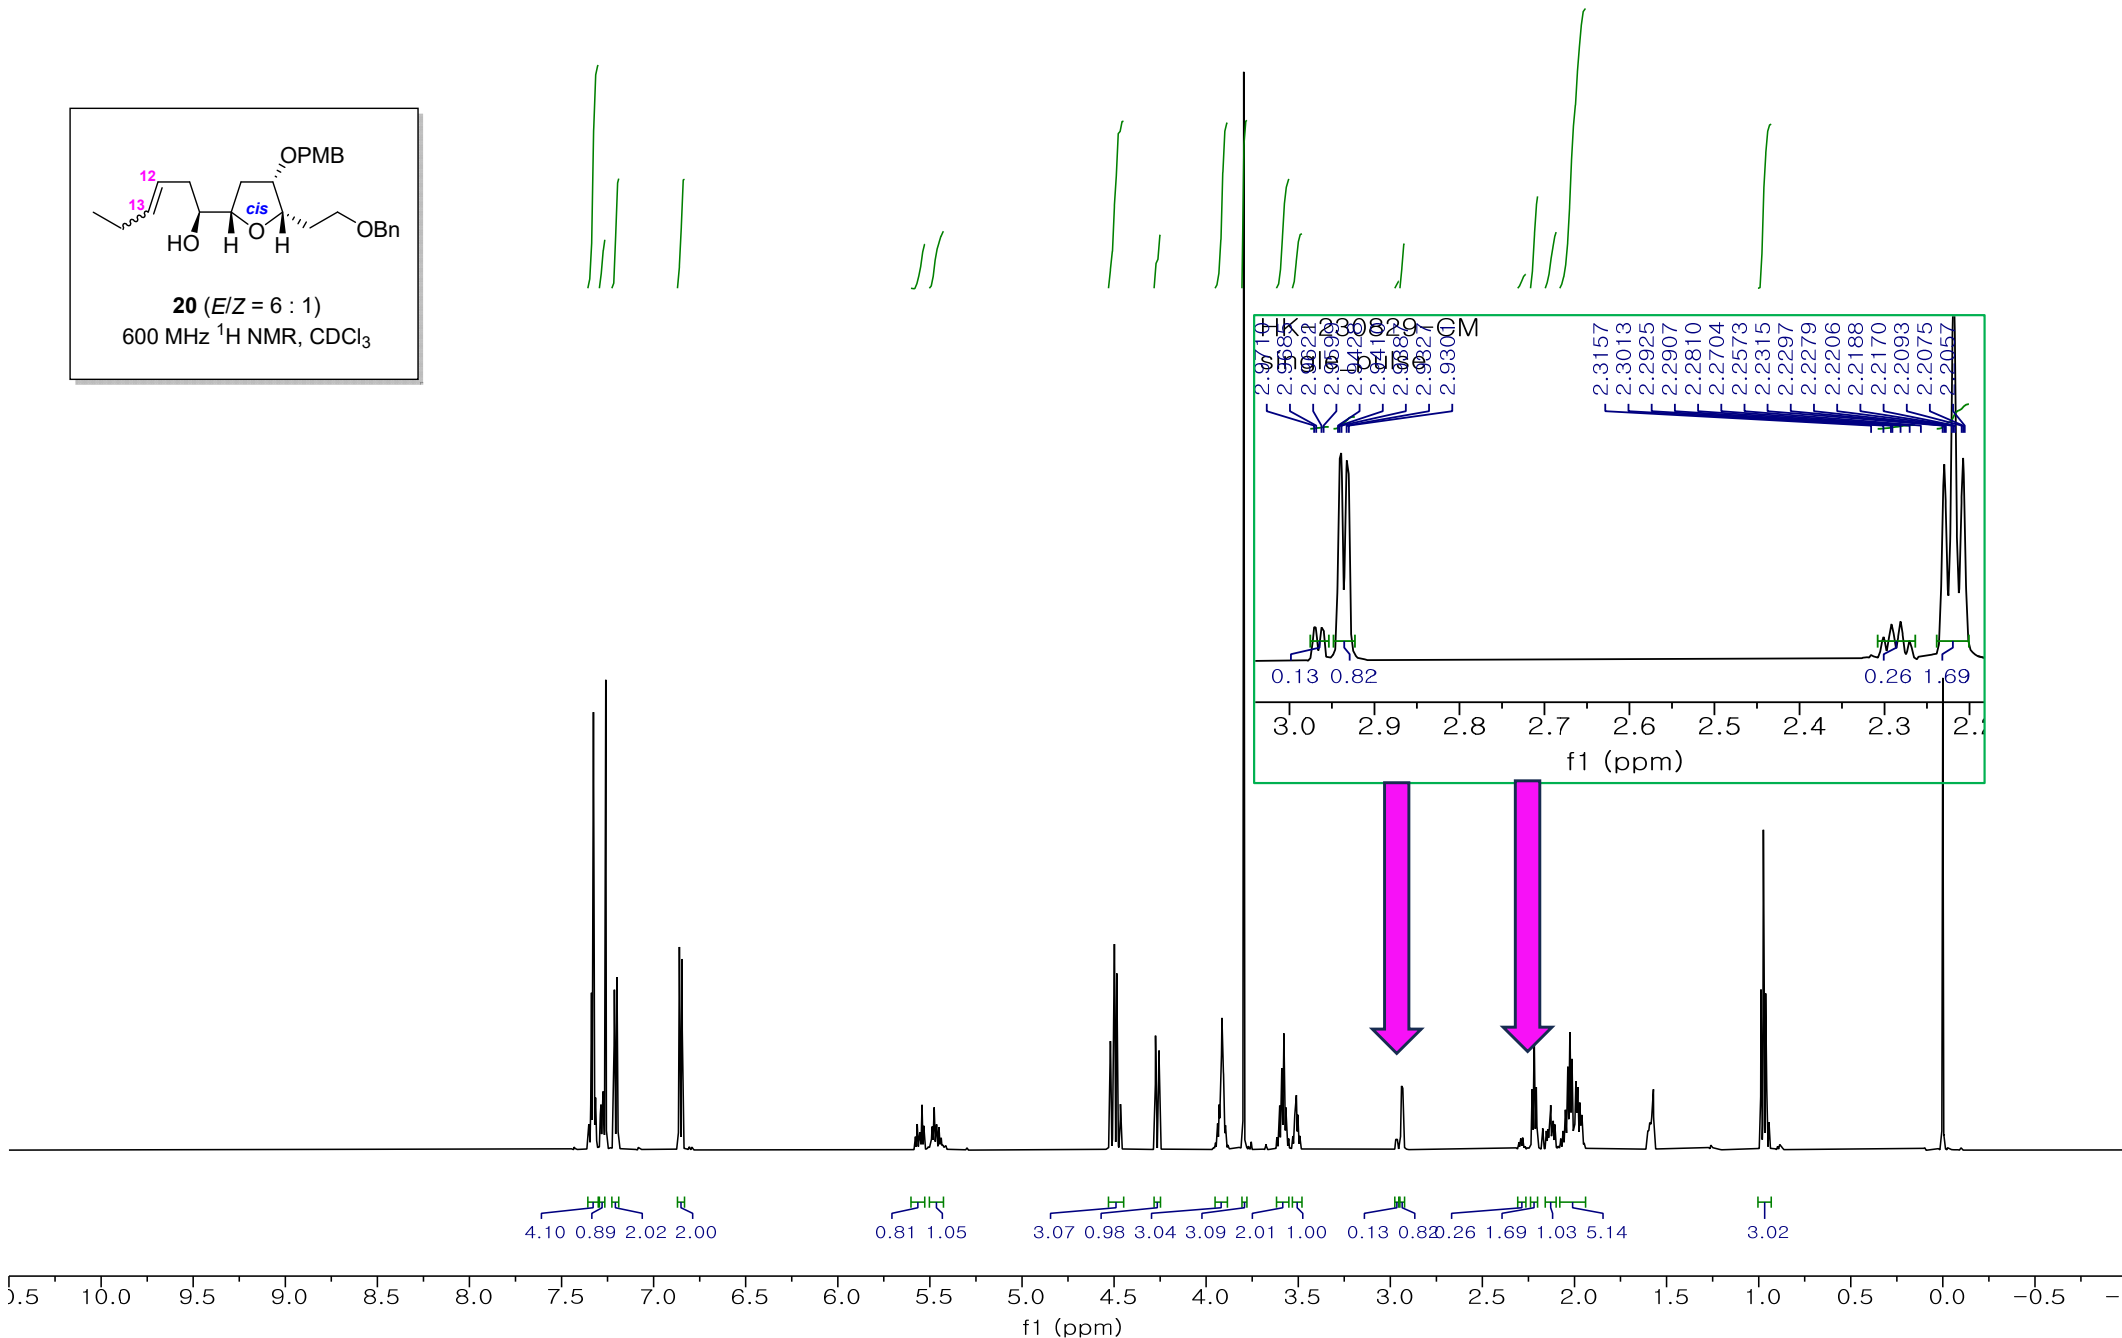

SK-3-40  
single pulse decoupled gated NOE

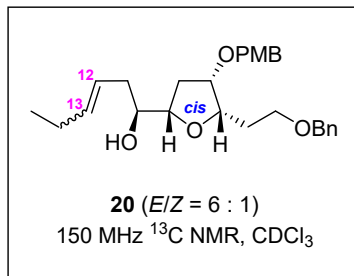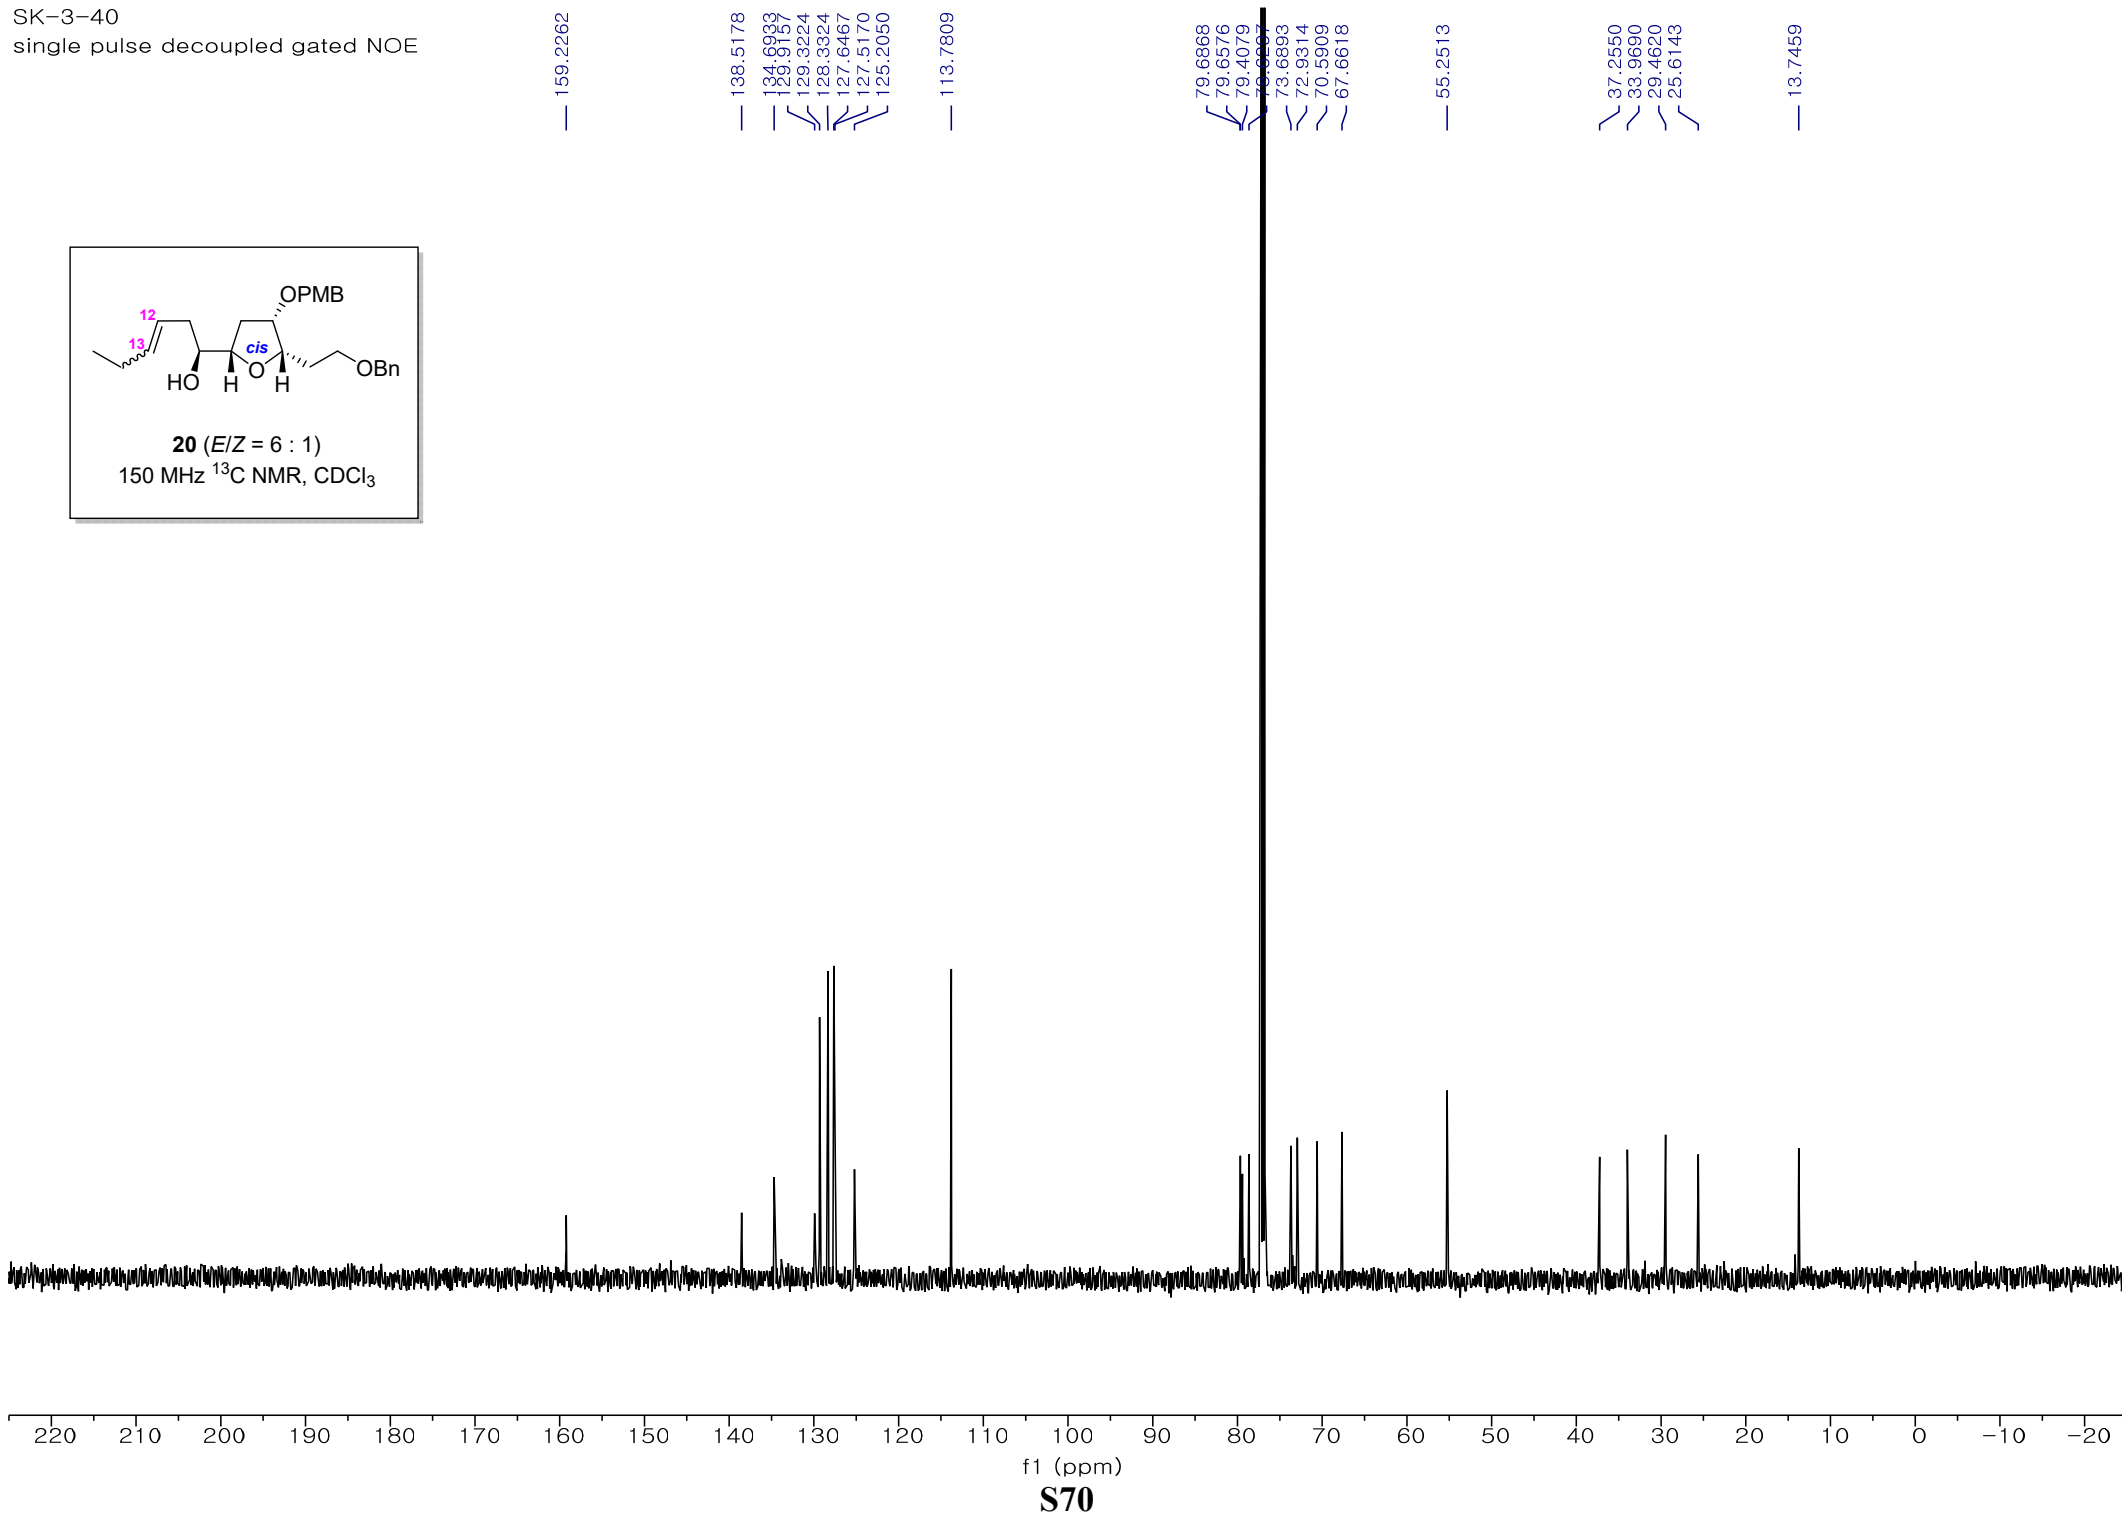

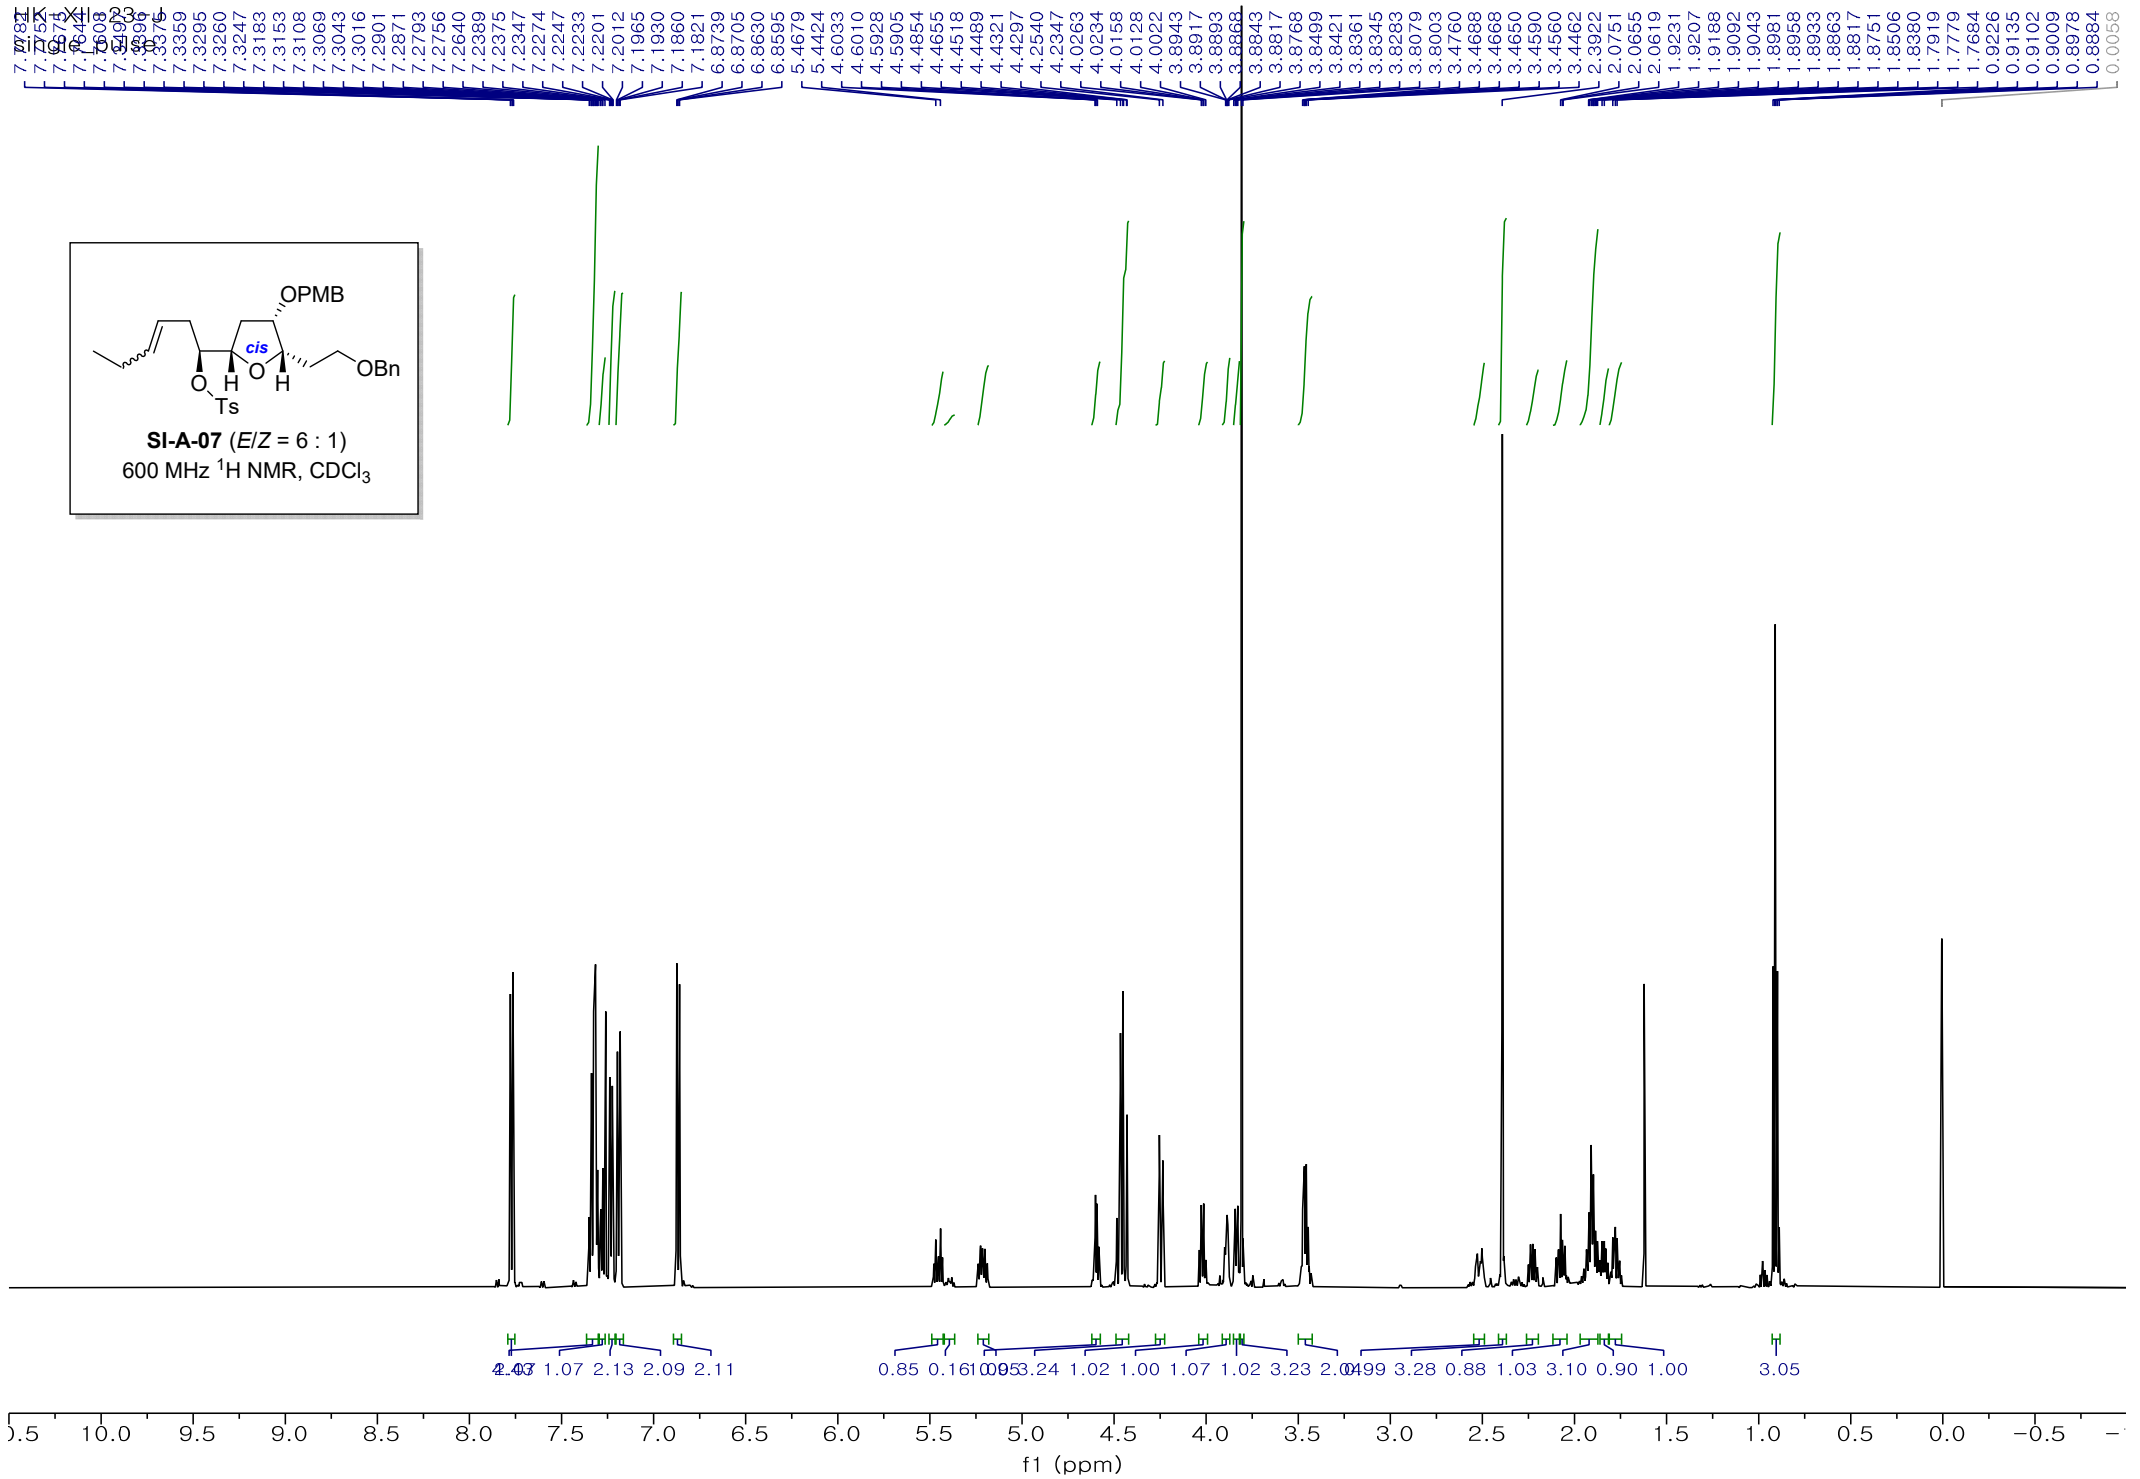

S71

HK-XII-23-J  
single pulse decoupled gated NOE

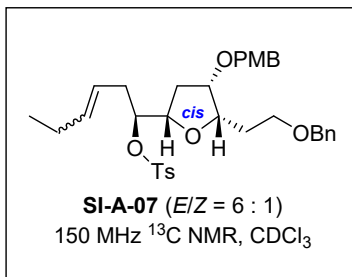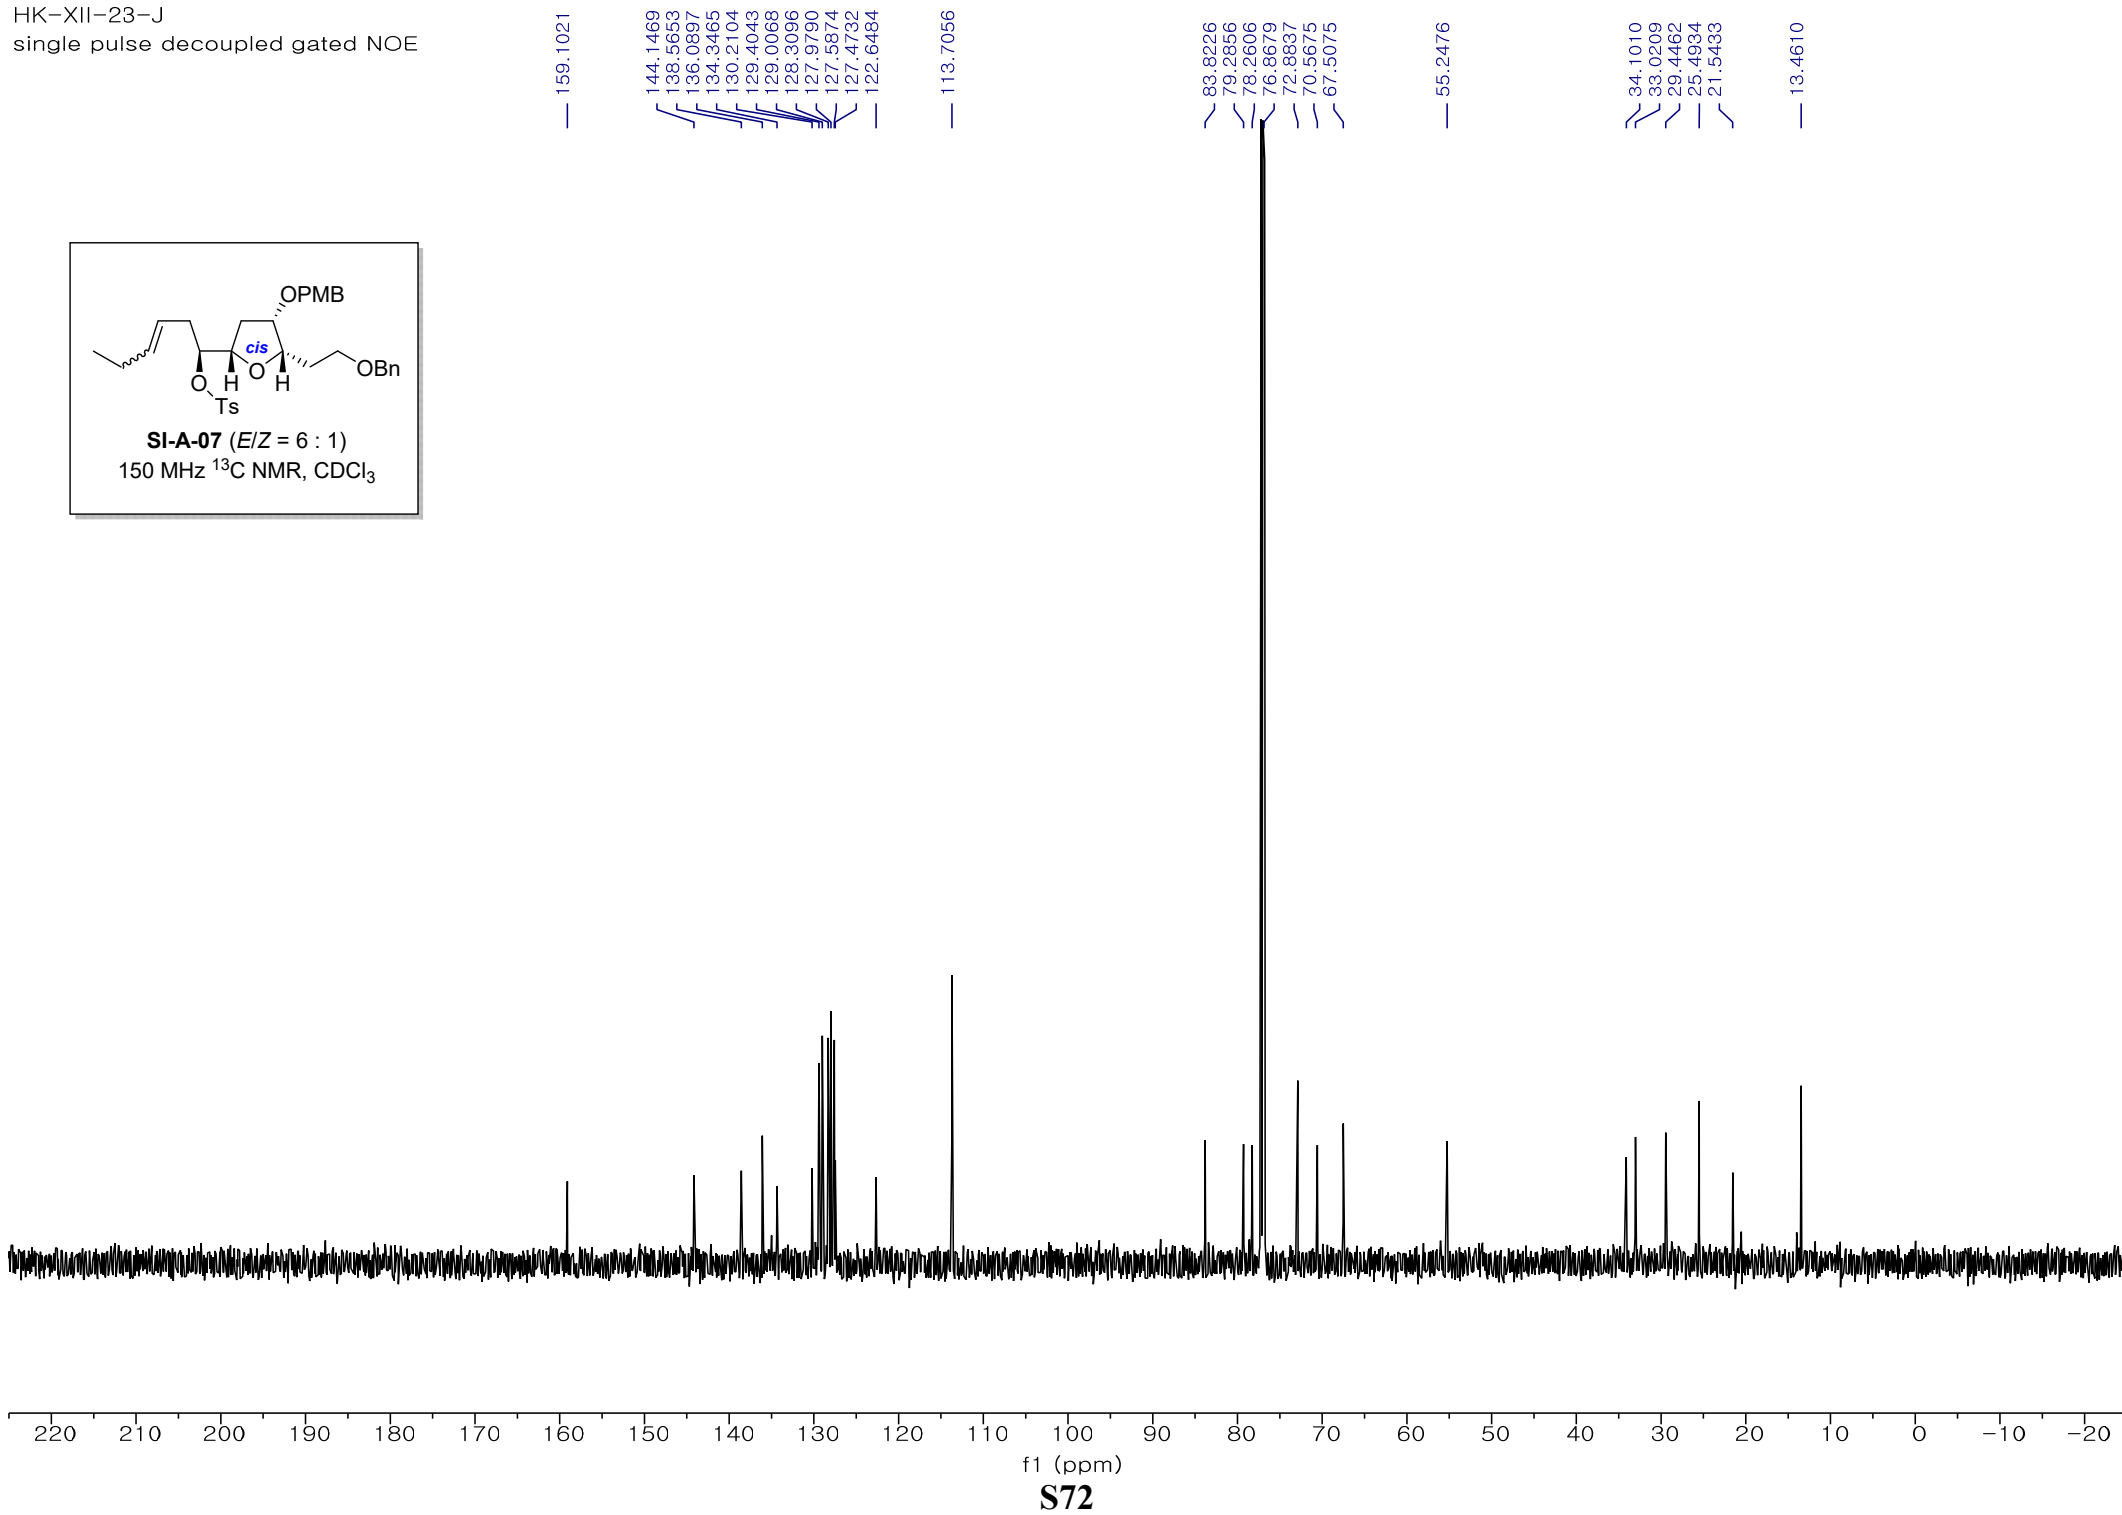



7.7051  
7.7039  
7.7027  
7.7016  
7.3411  
7.3399  
7.3387  
7.3292  
7.3226  
7.3188  
7.3062  
7.3033  
7.2992  
7.2946  
7.2919  
7.2867  
7.2840  
7.2763  
7.2725  
7.2620  
7.2478  
7.1946  
7.1911  
7.1838  
7.1803  
6.8668  
6.8634  
6.8559  
6.8525  
4.8619  
4.8585  
4.8543  
4.8509  
4.4757  
4.4557  
4.4478  
4.4414  
4.4287  
4.4215  
4.2448  
4.2258  
4.0927  
4.0902  
4.0850  
4.0825  
4.0789  
3.9099  
3.9072  
3.9046  
3.9025  
3.8997  
3.8971  
3.8924  
3.8853  
3.8773  
3.8719  
3.8640  
3.8025  
3.6342  
3.6320  
3.6265  
3.6246  
3.6192  
3.6169  
3.4838  
3.4810  
3.4741  
3.4719  
3.4688  
3.4638  
3.4594  
3.1778  
3.1710  
3.1640  
3.0767  
2.4034  
2.1117  
2.1020  
2.0982  
2.0882  
2.0485  
2.0433  
2.0375  
2.0023  
1.9976  
1.9909  
1.9862  
1.8838  
1.8803  
1.8719  
1.8487  
1.8389  
1.7523  
1.7371  
1.7350  
1.4126  
1.4054  
1.4001  
1.3692  
1.3571  
1.3556  
1.3434  
0.9045  
0.8921  
0.8797  
0.0021

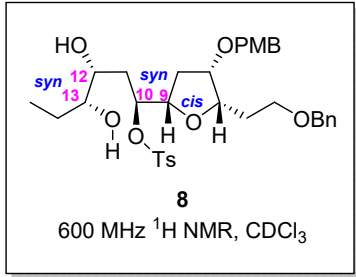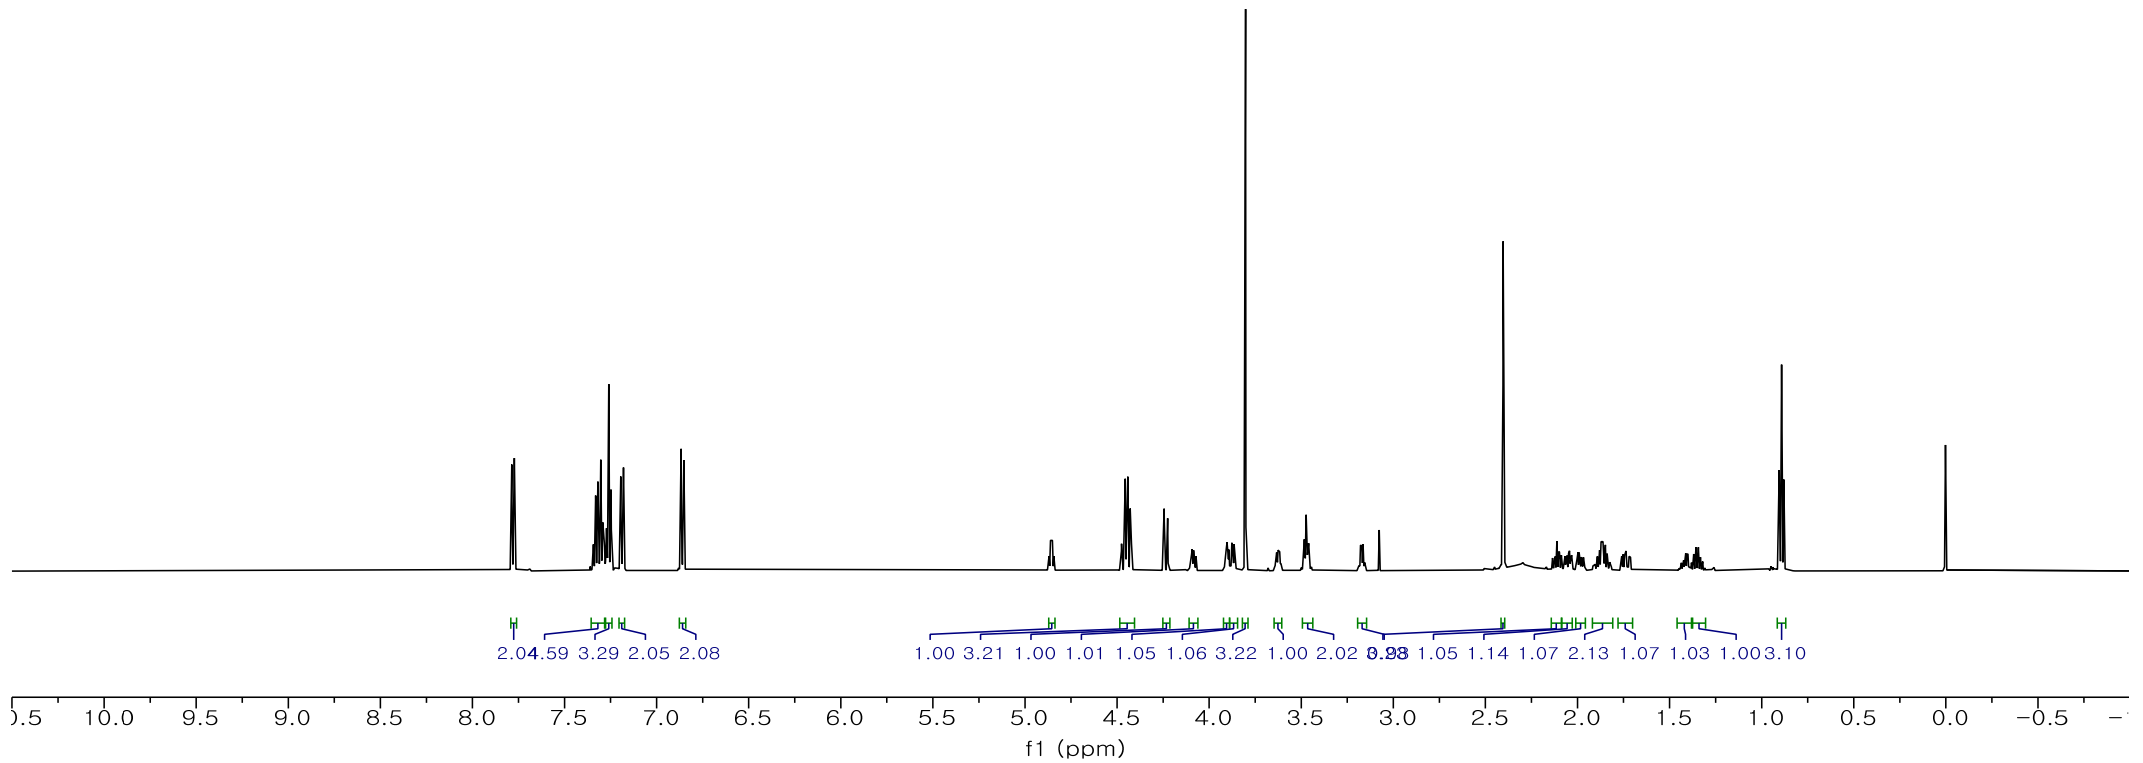

**S73**

HK-230902-1C  
single pulse decoupled gated NOE

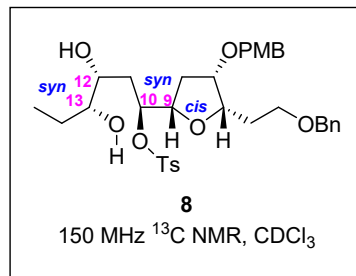

159.0302

144.4705  
138.3598  
133.8630  
130.0062  
129.5315  
128.9810  
128.1962  
127.7405  
127.4817  
127.4433  
127.3866

113.6124

80.6101  
79.5723  
77.9403  
77.2632  
75.2991  
72.7518  
70.4198  
69.5861  
67.2627

55.1145

35.5102  
32.9679  
29.1255  
26.0866  
21.4289

9.8613

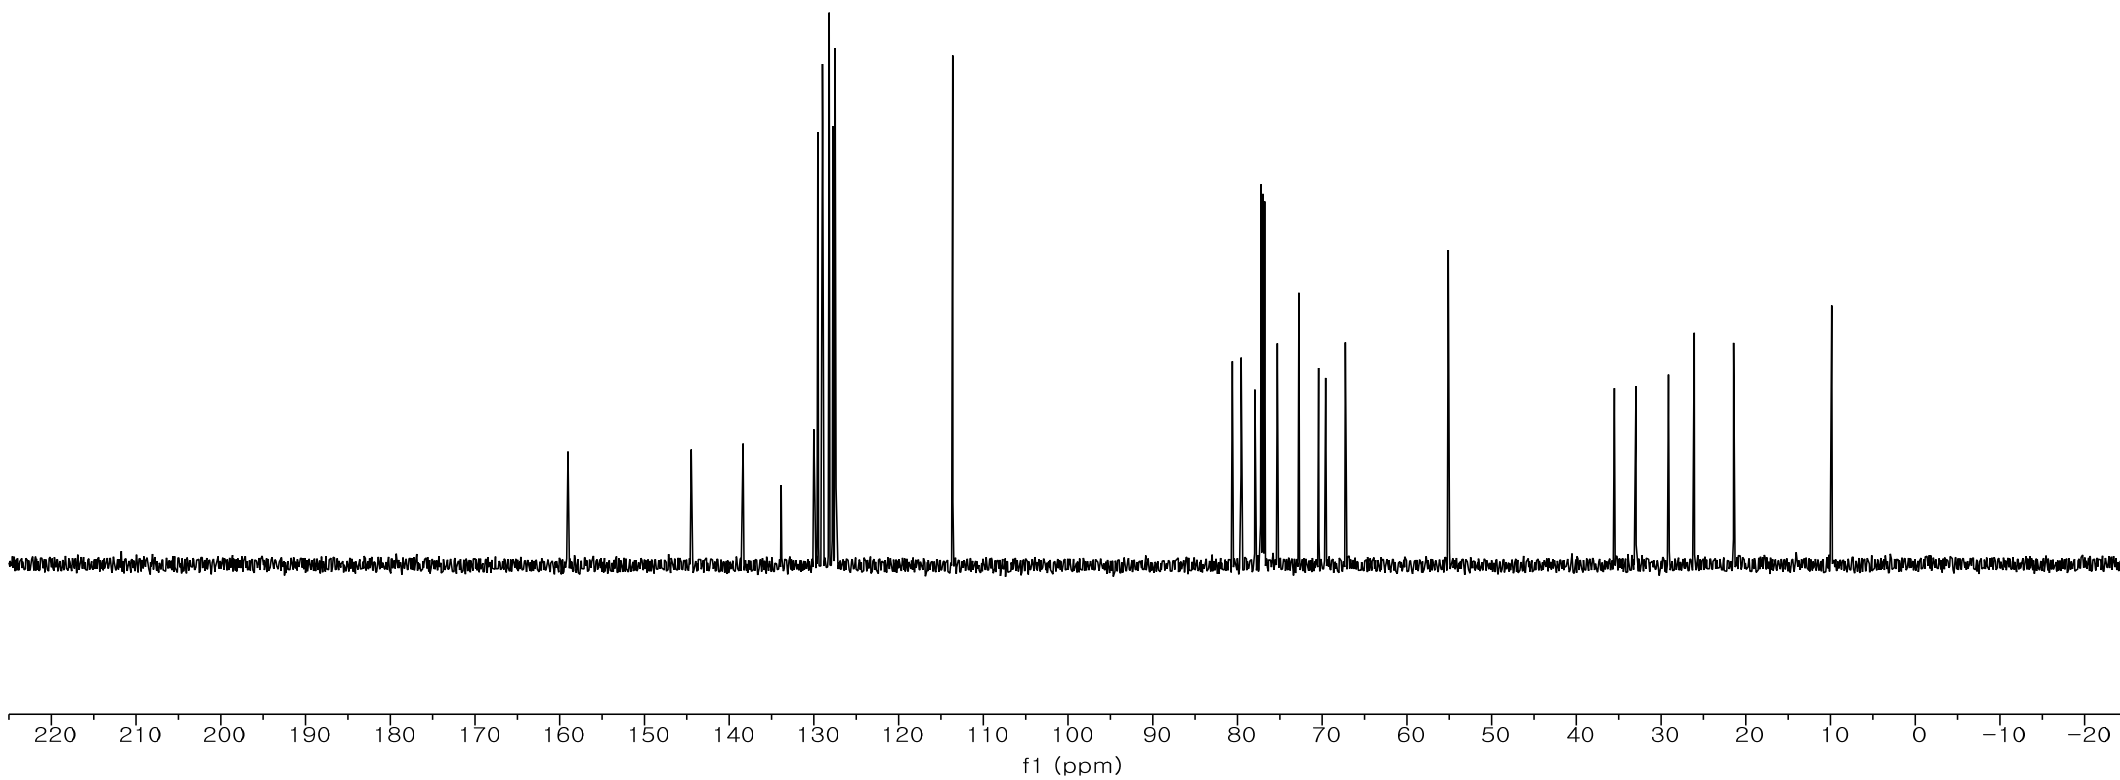

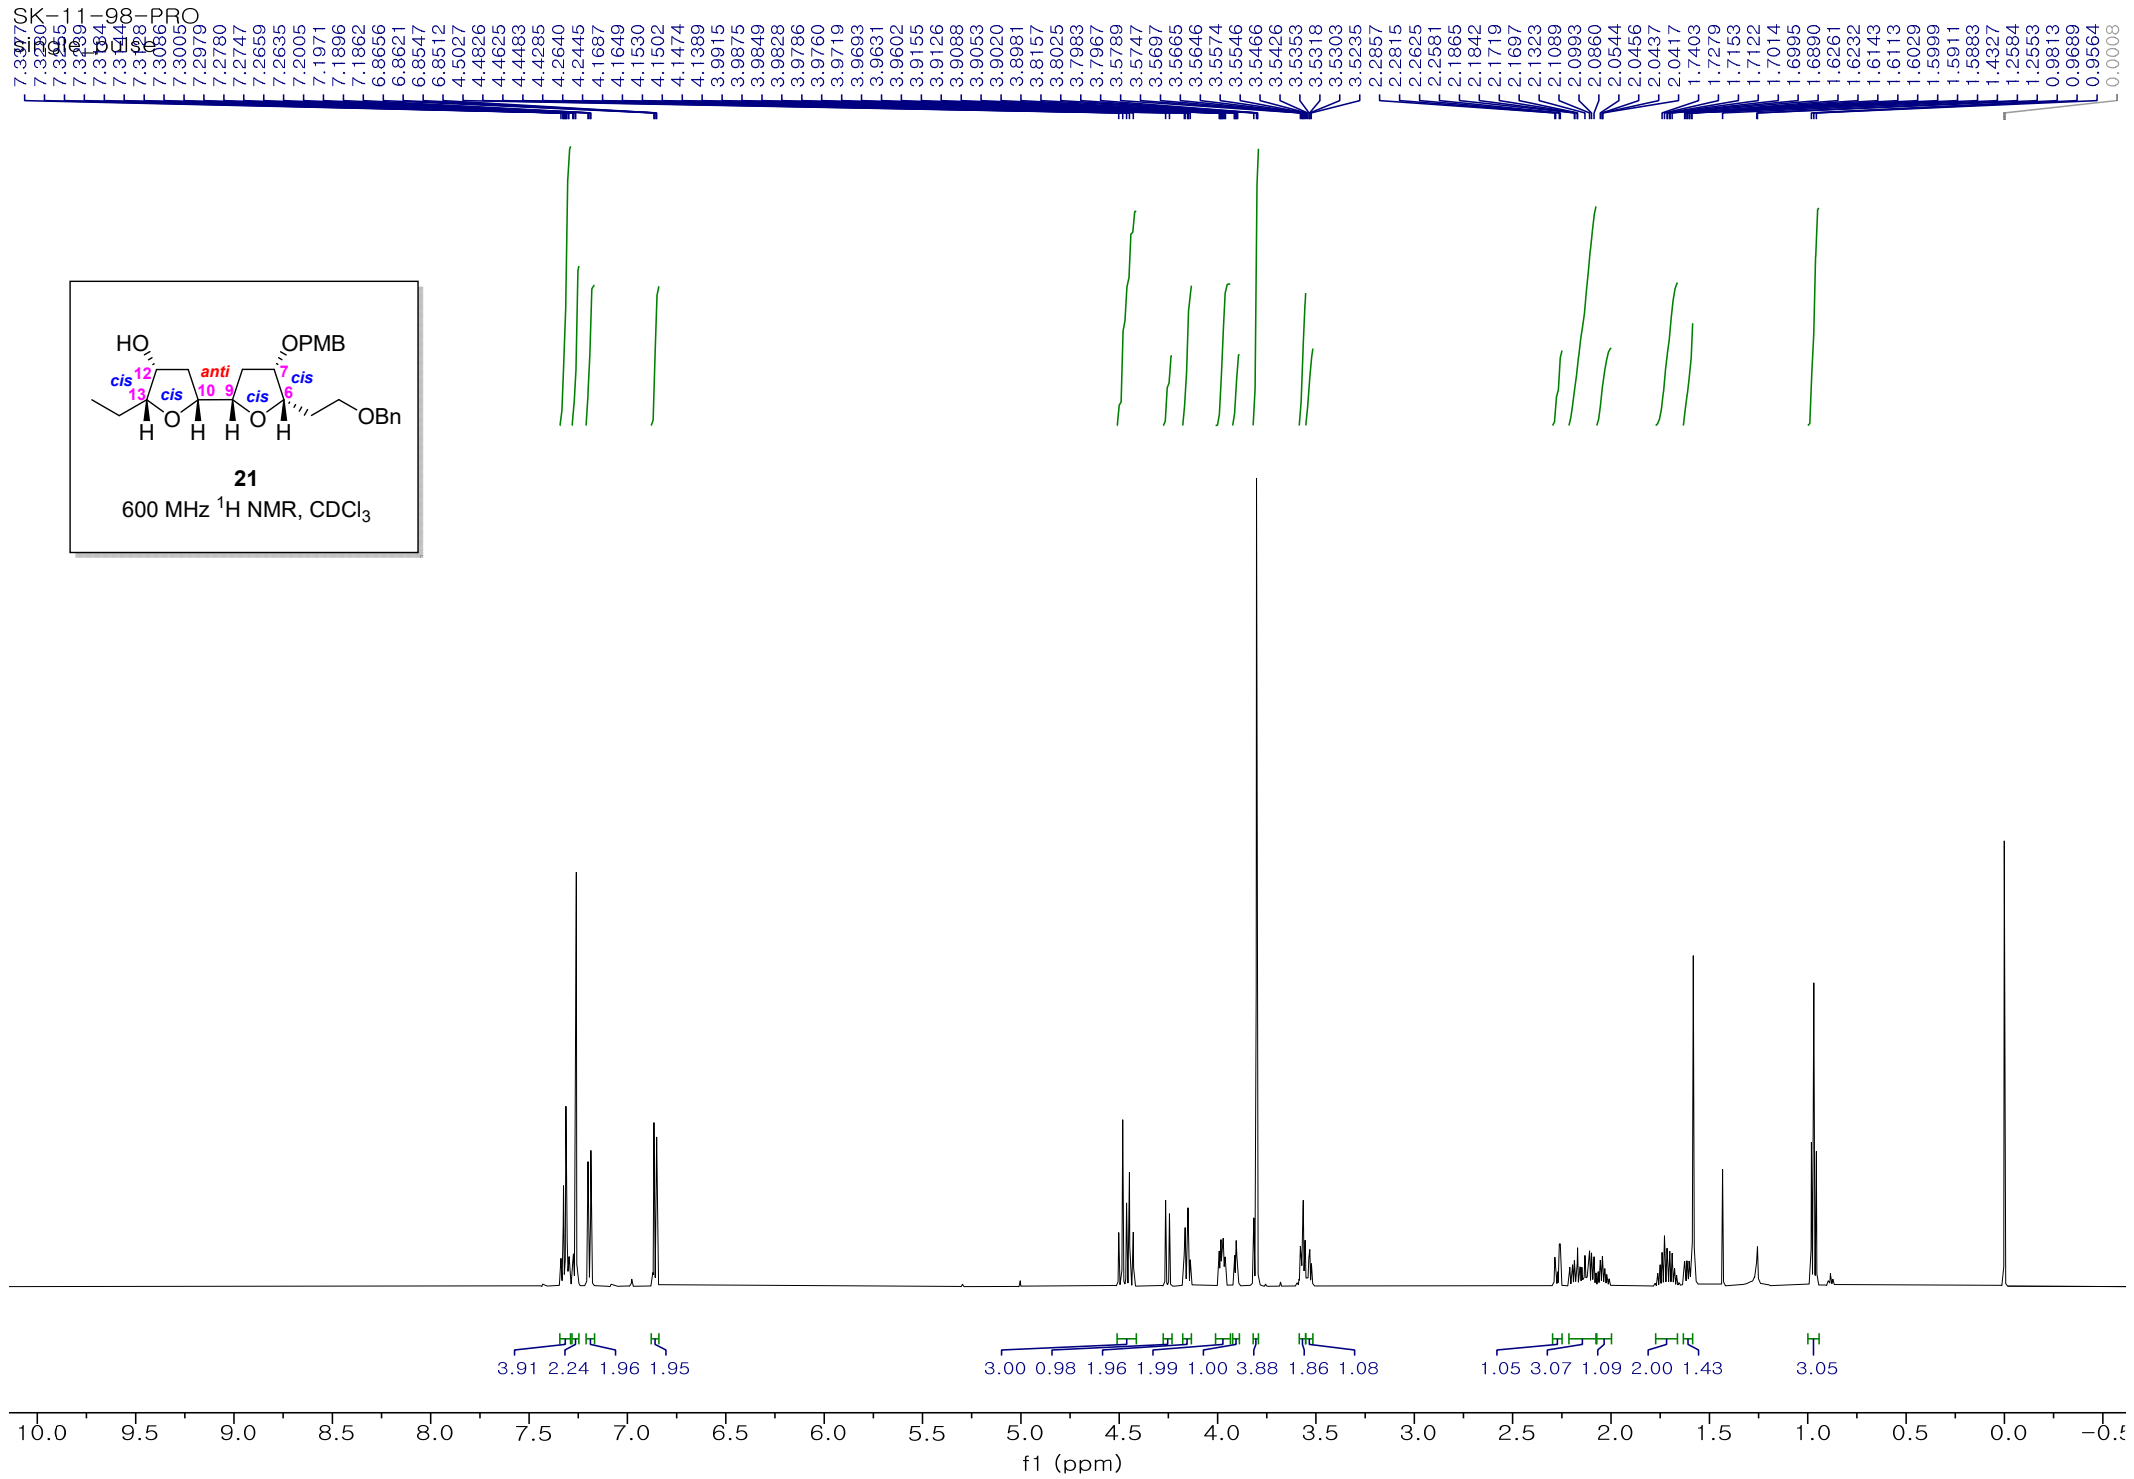

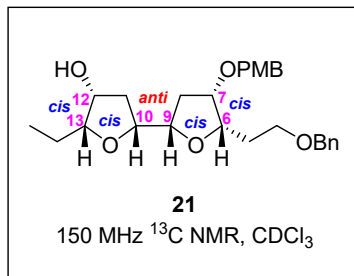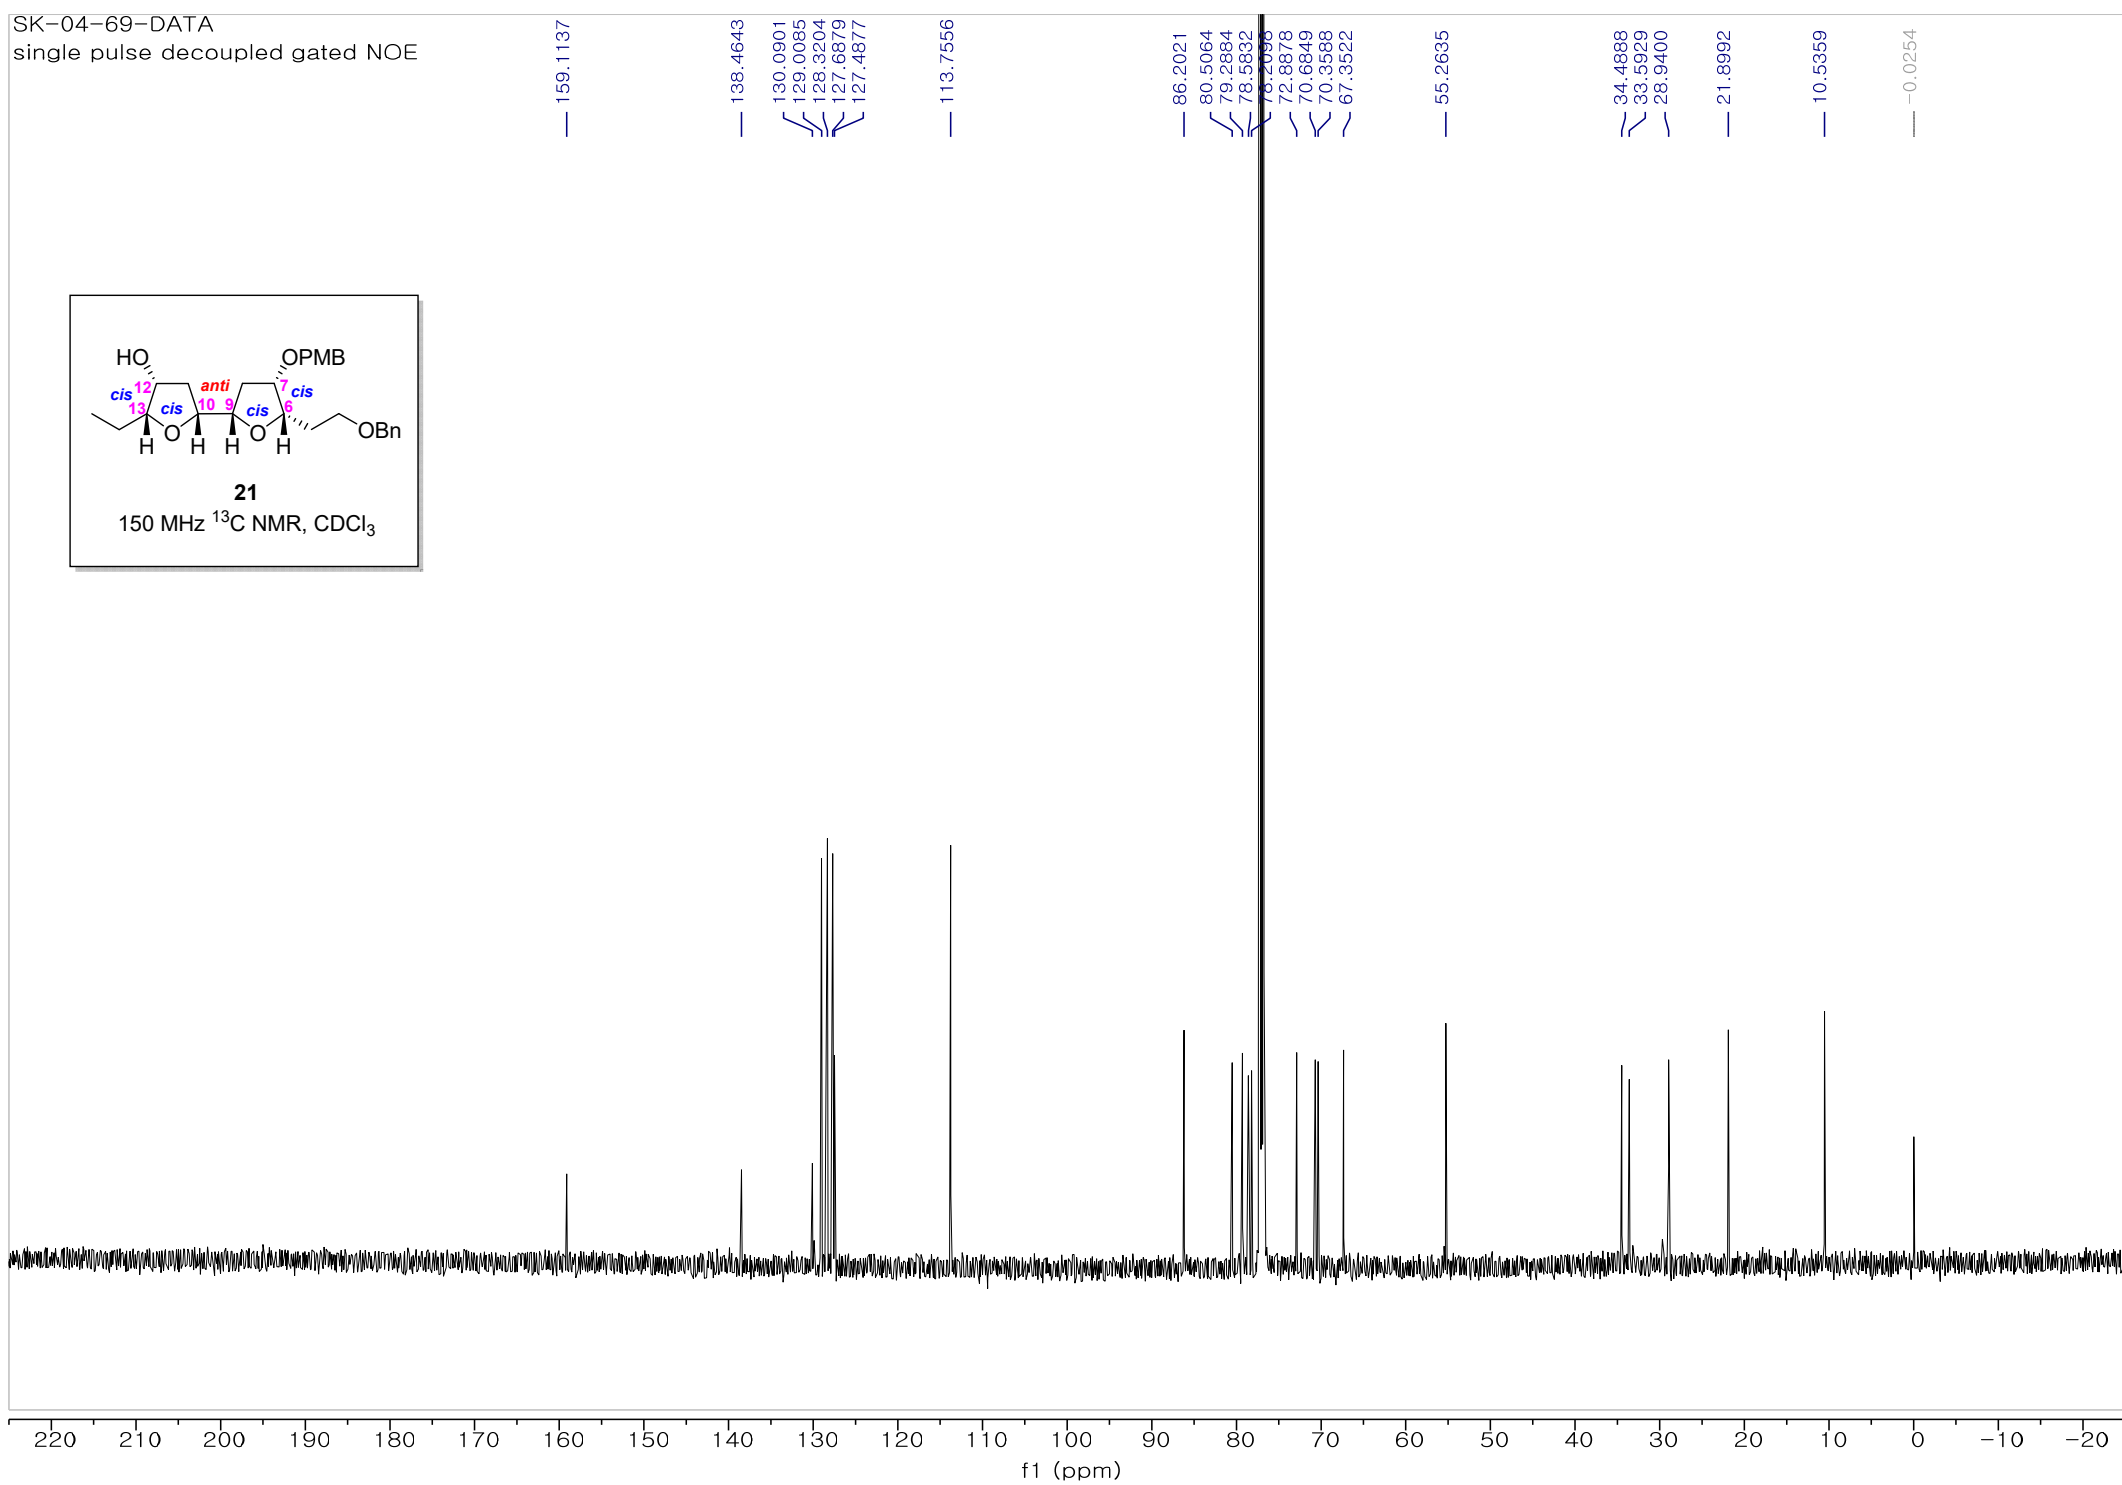

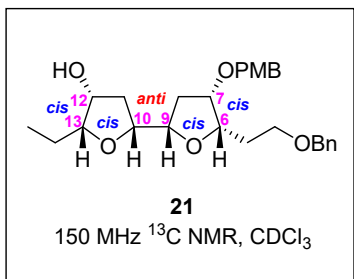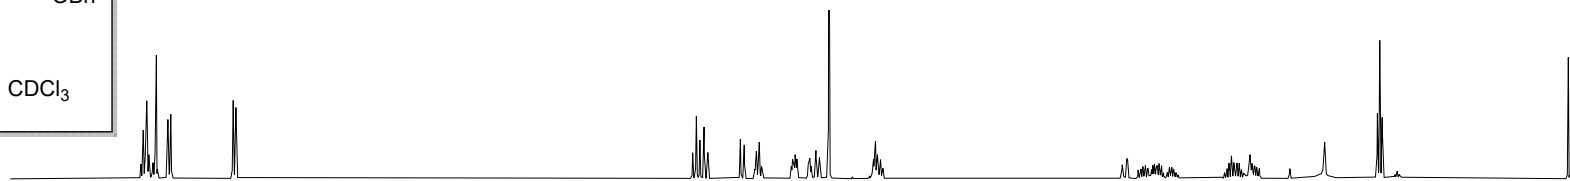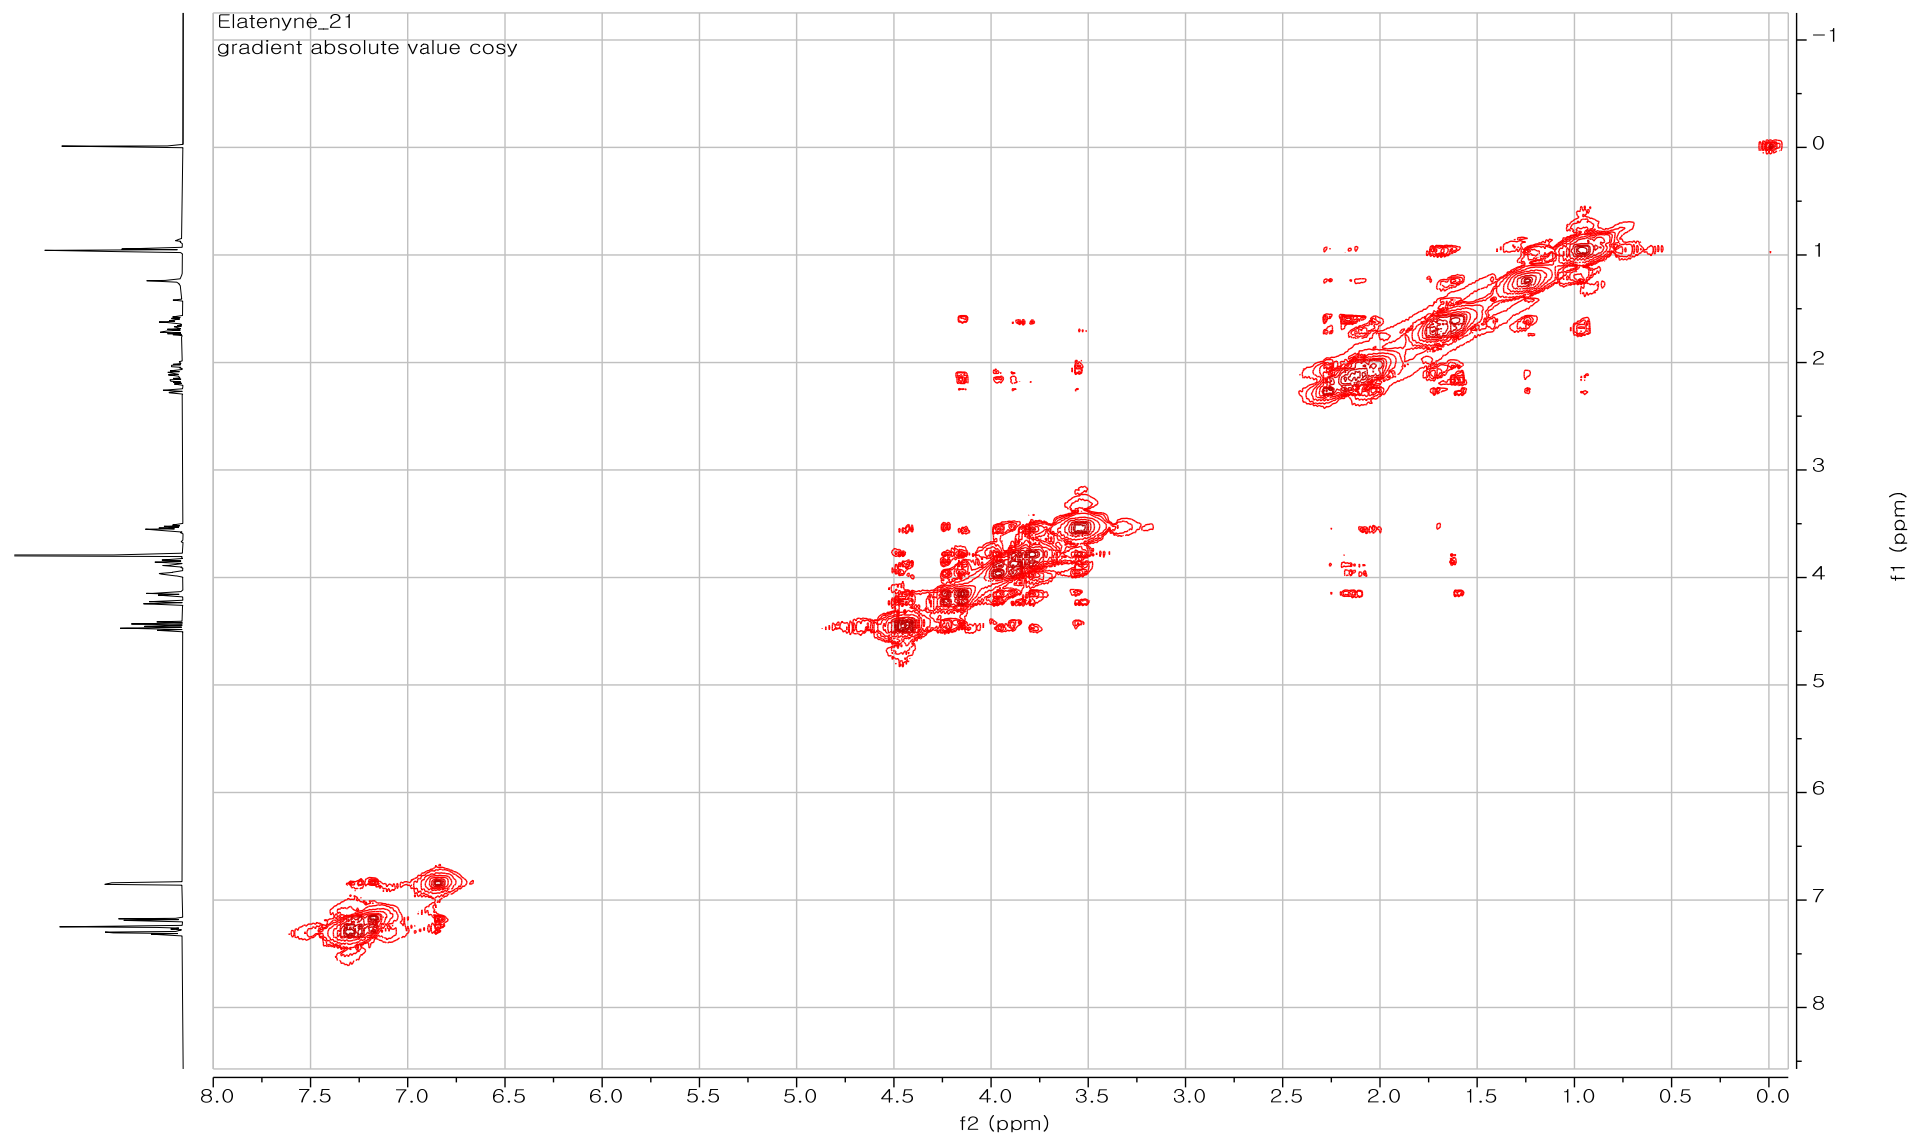

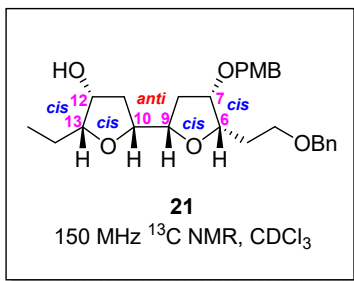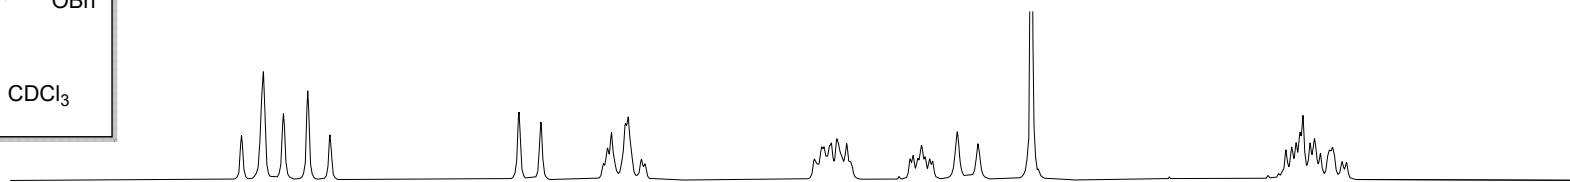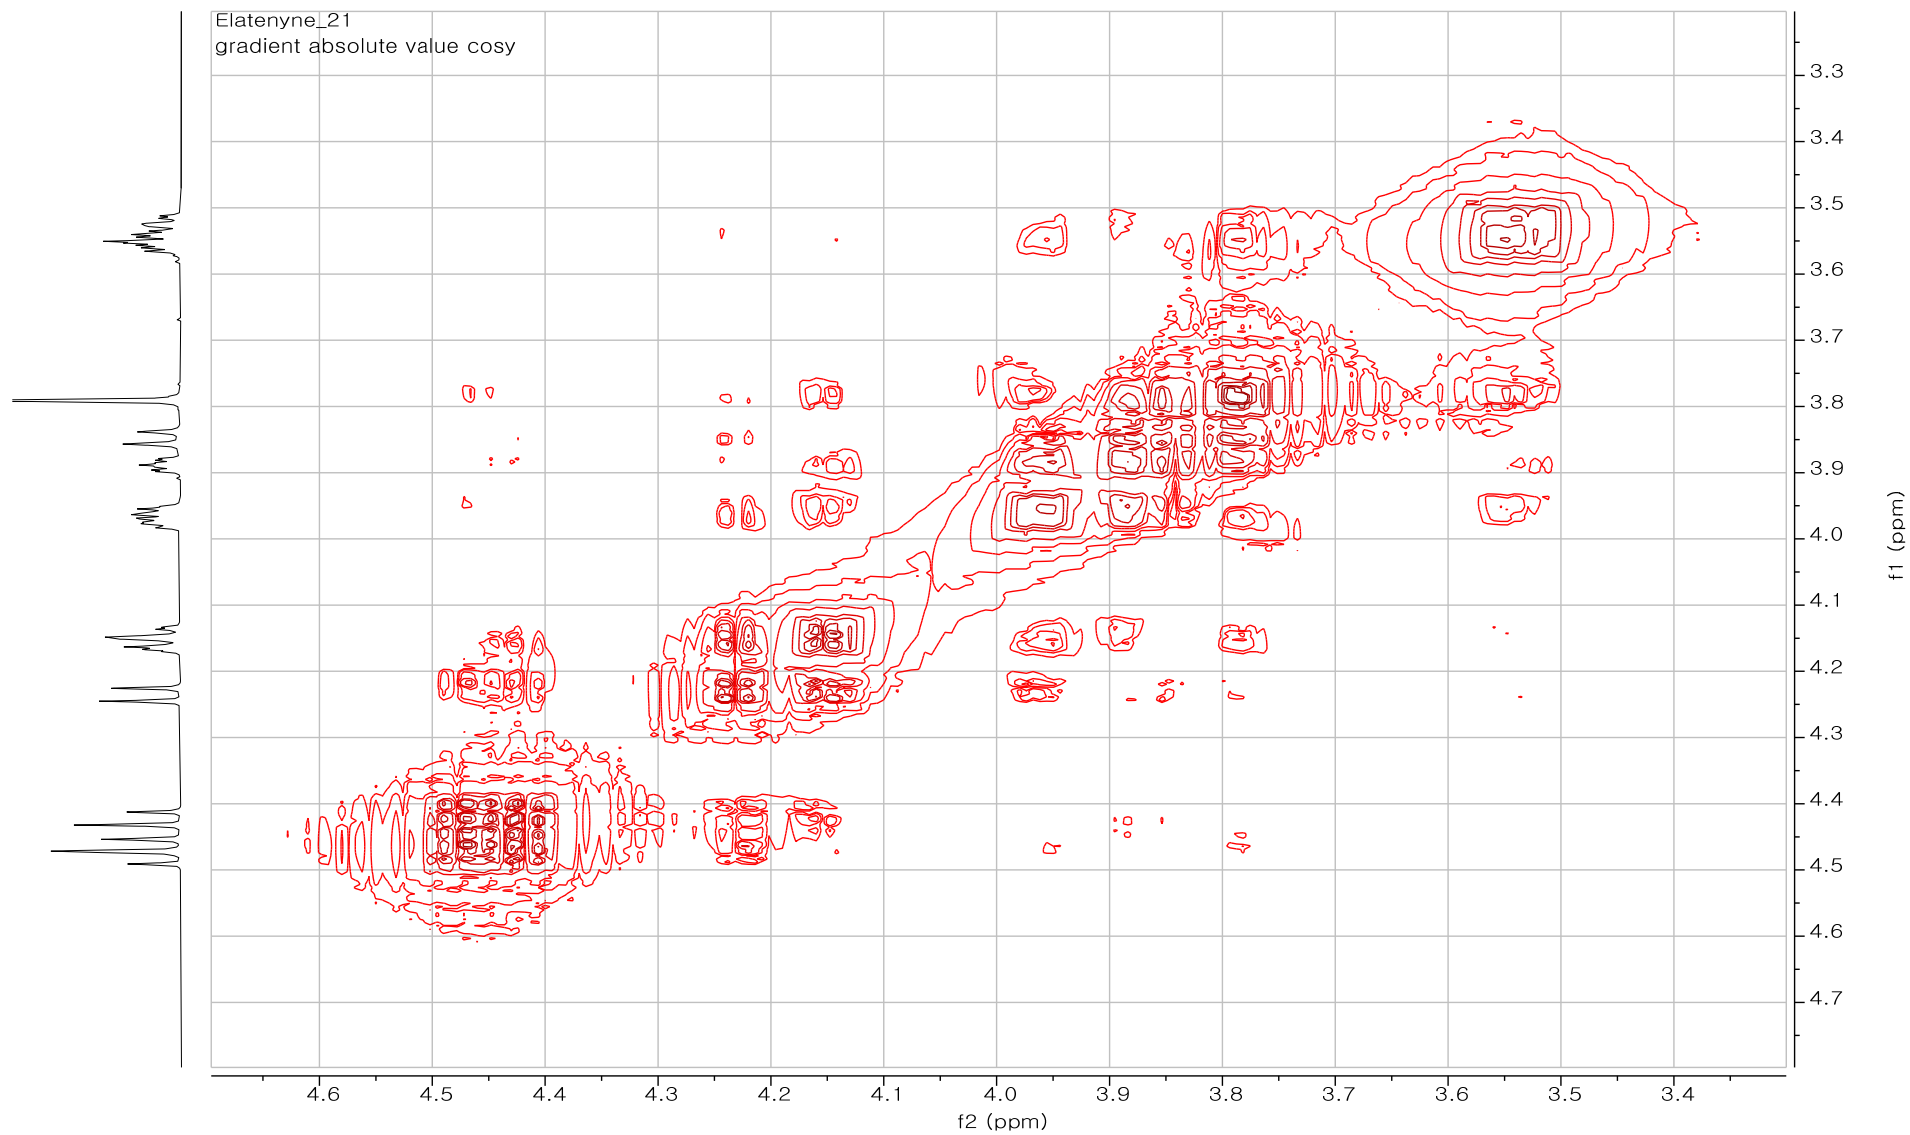

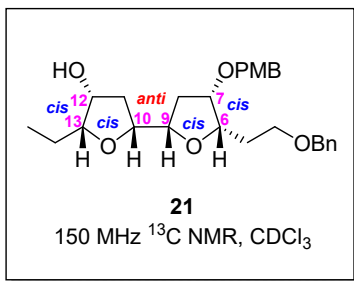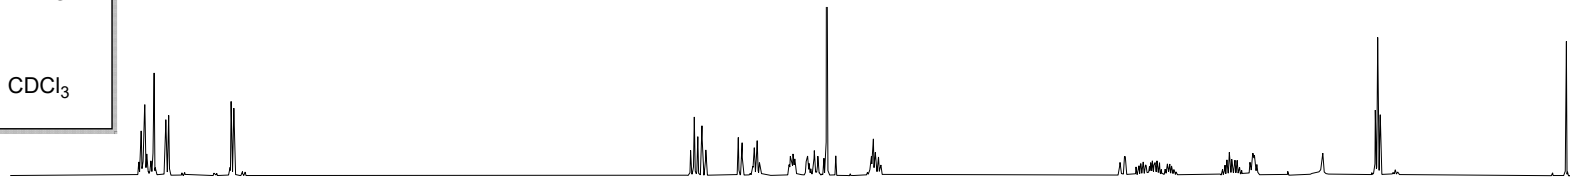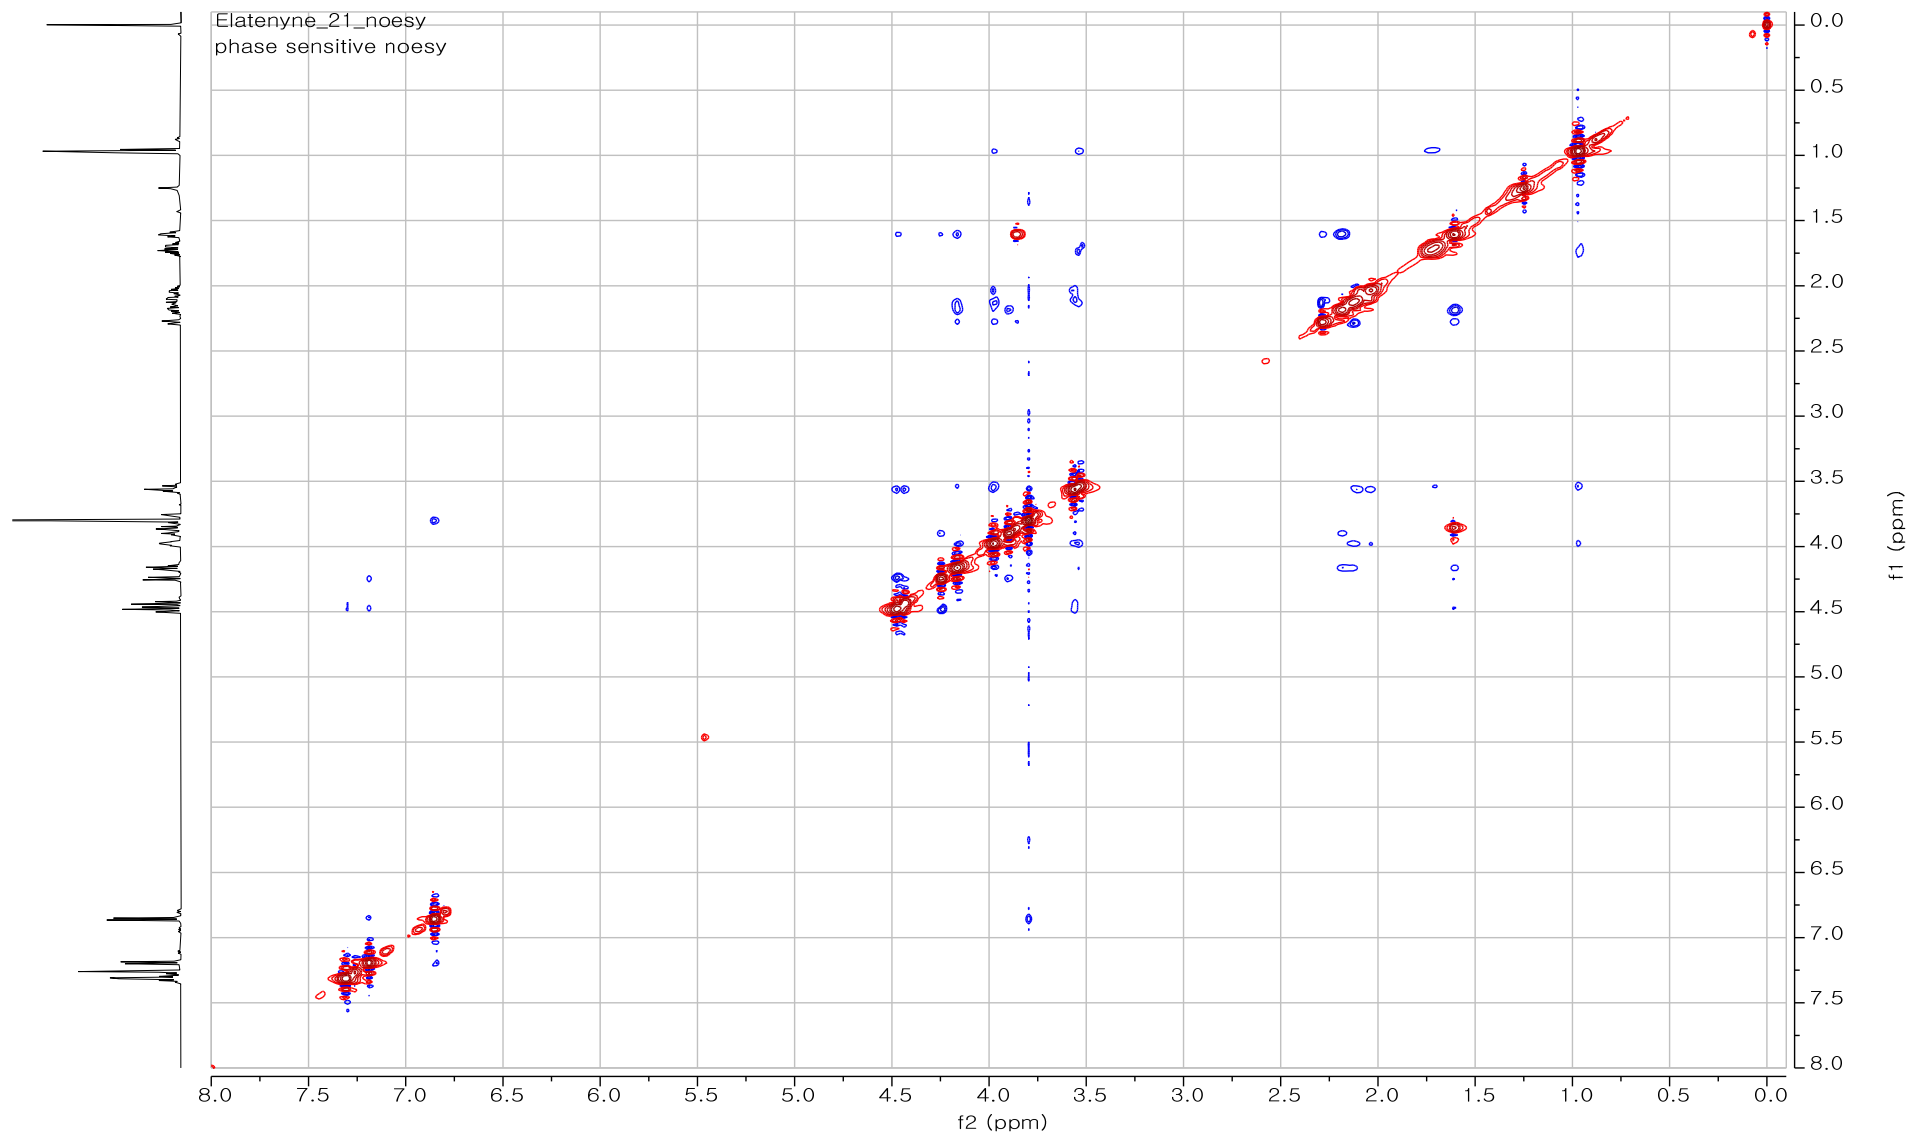

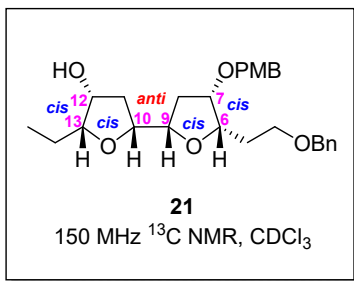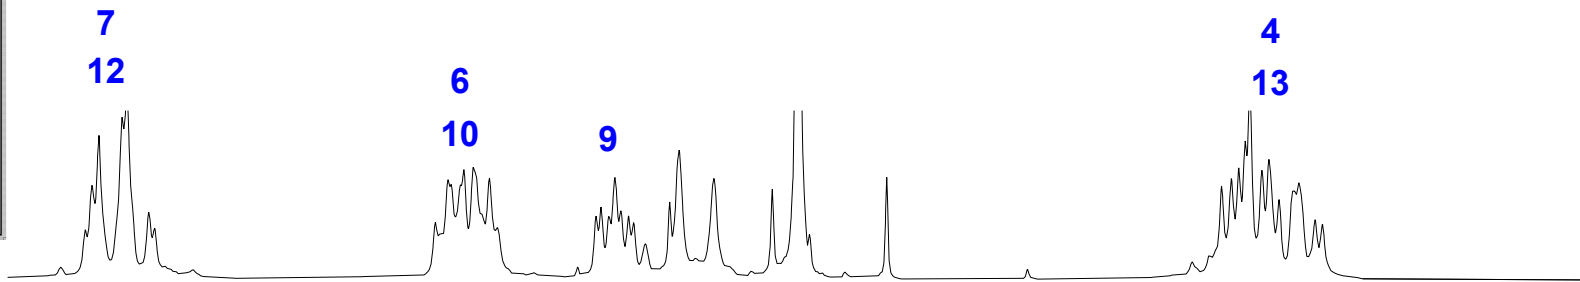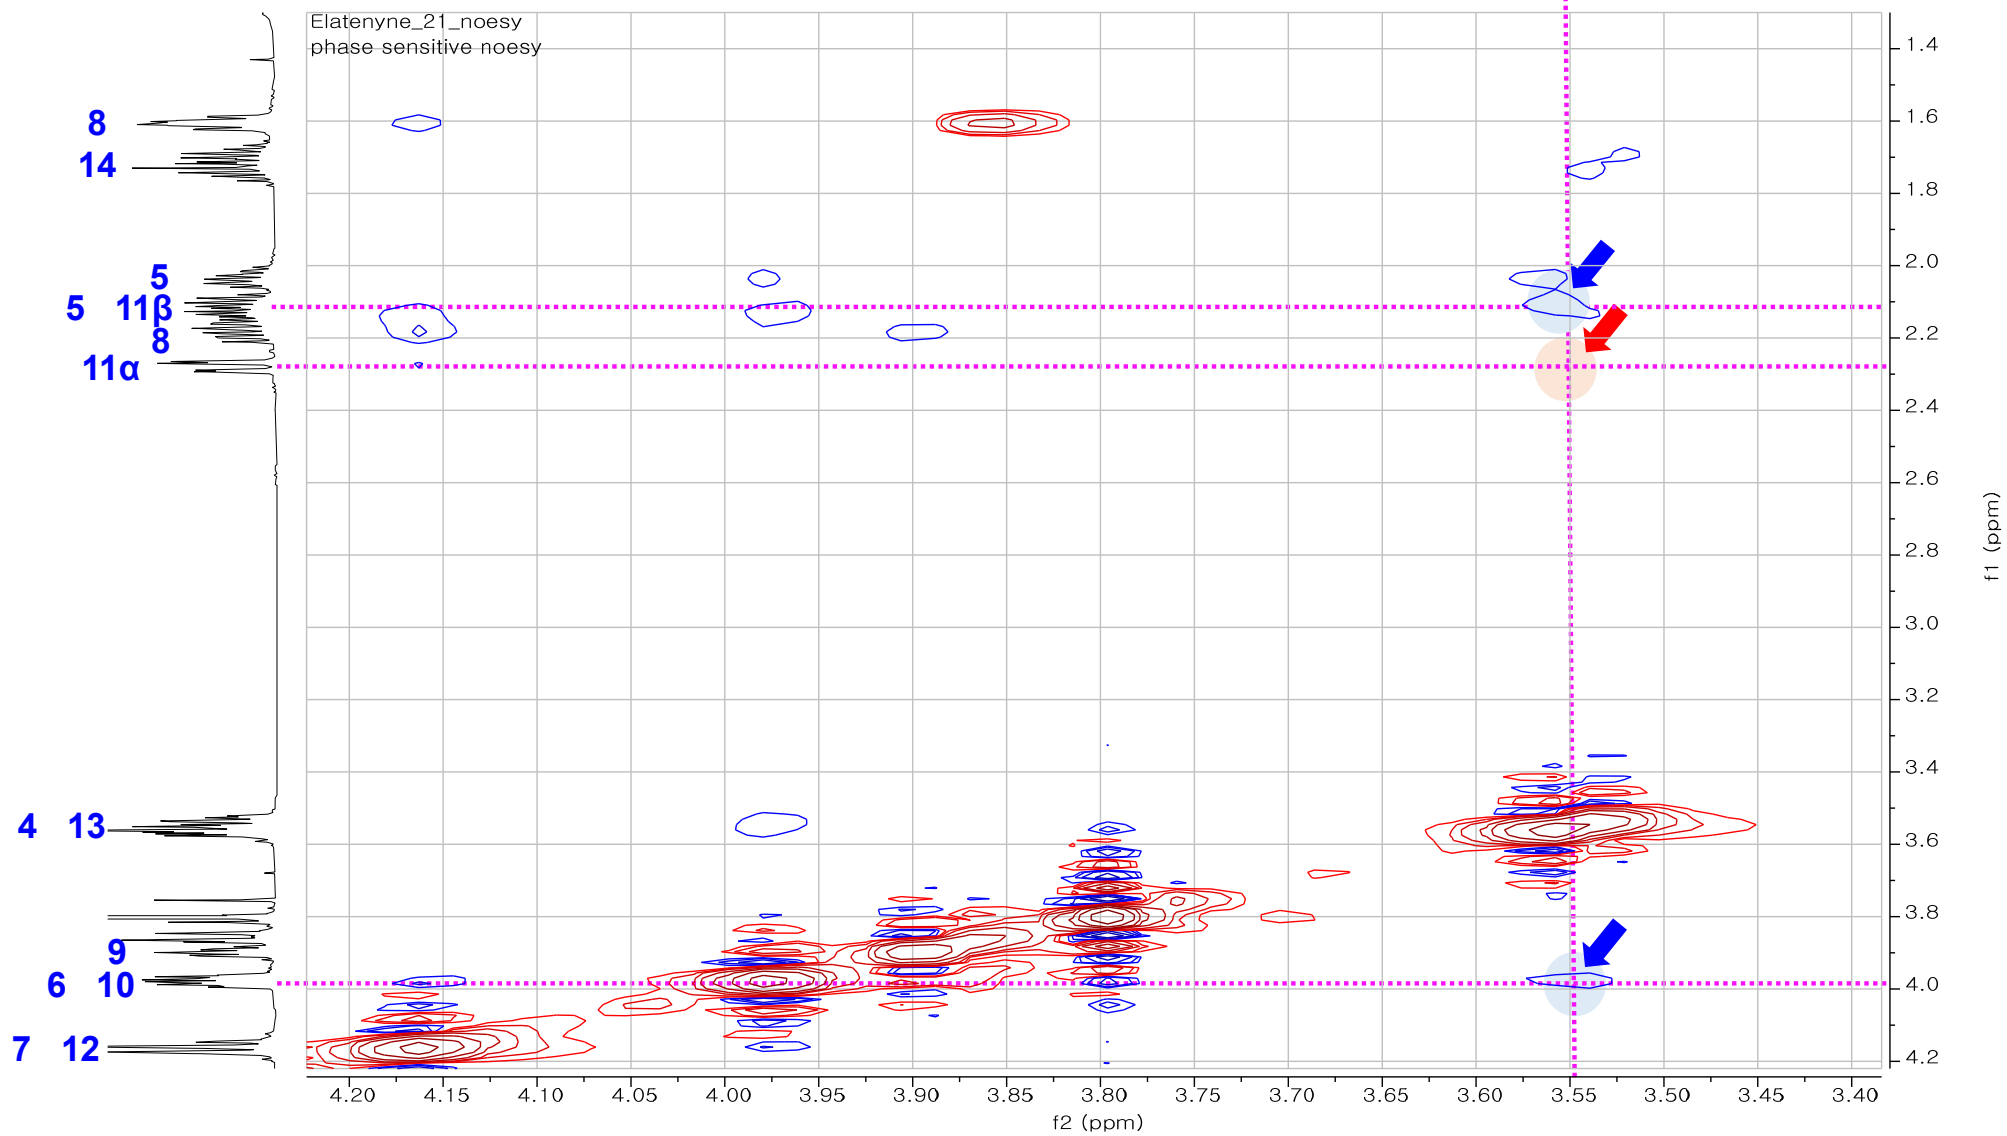



7.3030  
7.3028  
7.3026  
7.3024  
7.3022  
7.3020  
7.3018  
7.2876  
7.2841  
7.2789  
7.2774  
7.2764  
7.2730  
7.2678  
7.2178  
7.2035  
6.8676  
6.8631  
6.8597  
6.8518  
6.8487  
5.2439  
5.2416  
5.2384  
5.2359  
5.2338  
5.2313  
5.2282  
5.2259  
4.5591  
4.5173  
4.5139  
4.4975  
4.4760  
4.4561  
4.2819  
4.2627  
3.9352  
3.9284  
3.9249  
3.9211  
3.9175  
3.9155  
3.9086  
3.9062  
3.8984  
3.8970  
3.8862  
3.8824  
3.8739  
3.8057  
3.7996  
3.7962  
3.6849  
3.6793  
3.6746  
3.6691  
3.6571  
3.5855  
3.5832  
3.5742  
3.5630  
2.4795  
2.4650  
2.4543  
2.4520  
2.4415  
2.3707  
2.3686  
2.3625  
2.3456  
2.3433  
2.3370  
2.3346  
2.2124  
2.2093  
2.1993  
2.1893  
2.1864  
2.1770  
2.0692  
2.0661  
2.0609  
2.0579  
2.0461  
2.0427  
2.0383  
2.0350  
2.0106  
2.0001  
1.9897  
1.9782  
1.7818  
1.7710  
1.7585  
1.7515  
1.7461  
1.7411  
1.7391  
1.7287  
1.7163  
1.0409  
1.0285  
1.0160  
0.0025

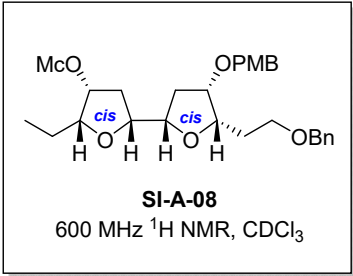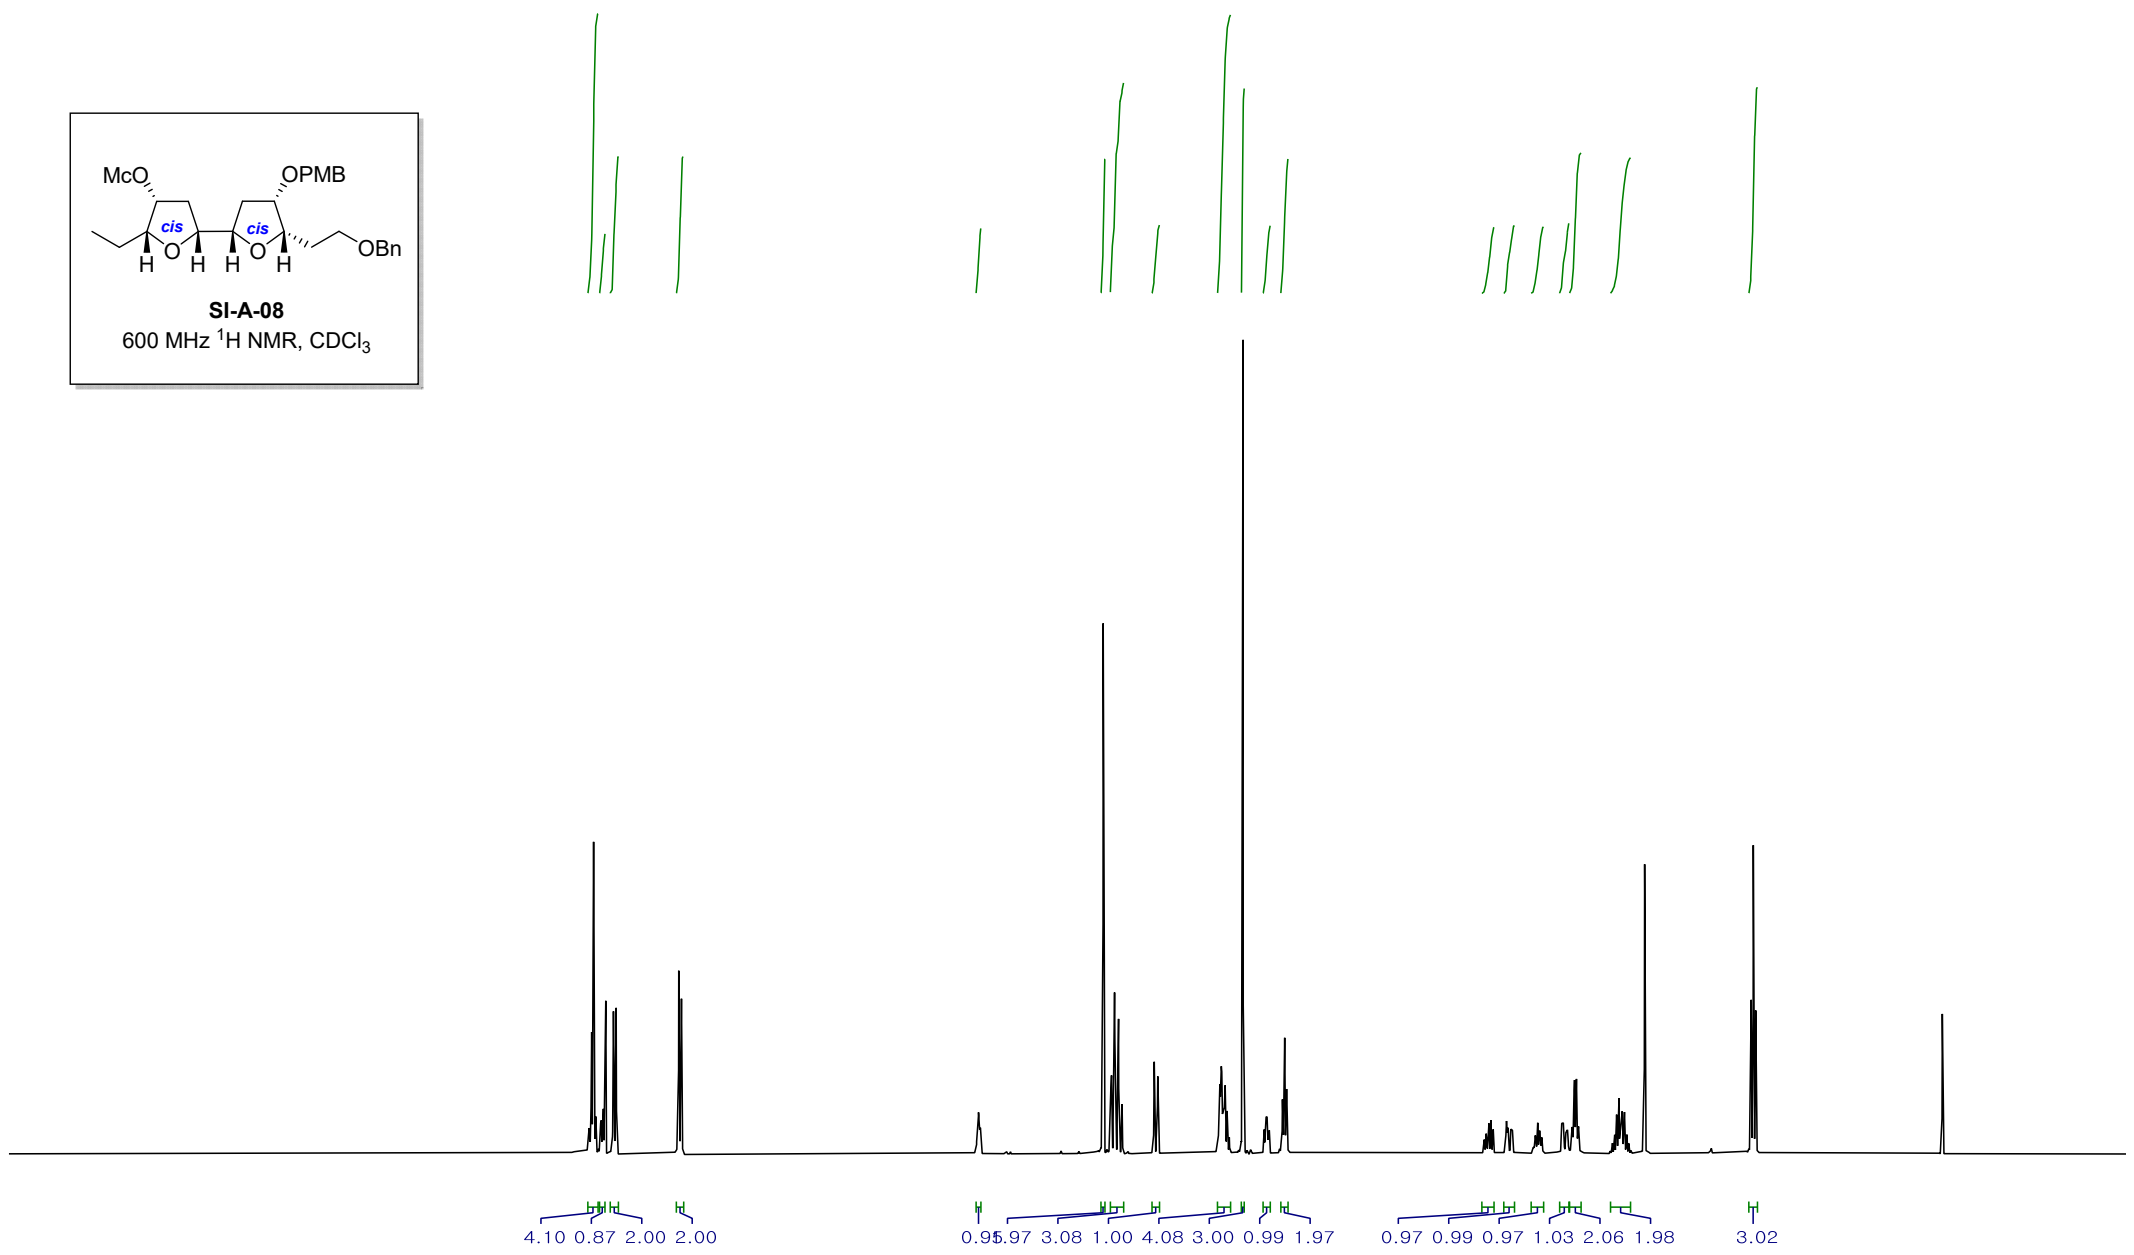

10.0 9.5 9.0 8.5 8.0 7.5 7.0 6.5 6.0 5.5 5.0 4.5 4.0 3.5 3.0 2.5 2.0 1.5 1.0 0.5 0.0 -0.5 -

f1 (ppm)

**S81**

SK-2-4-C  
single pulse decoupled gated NOE

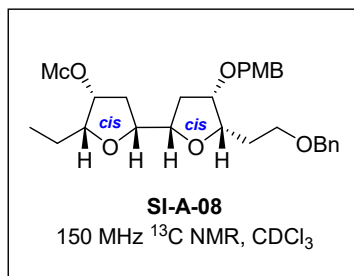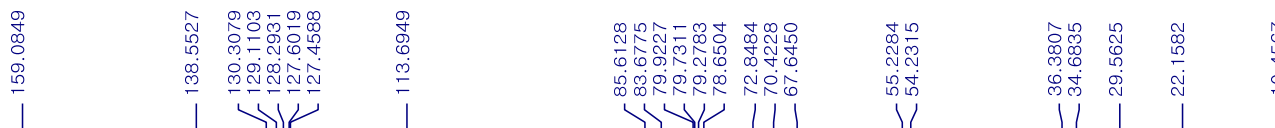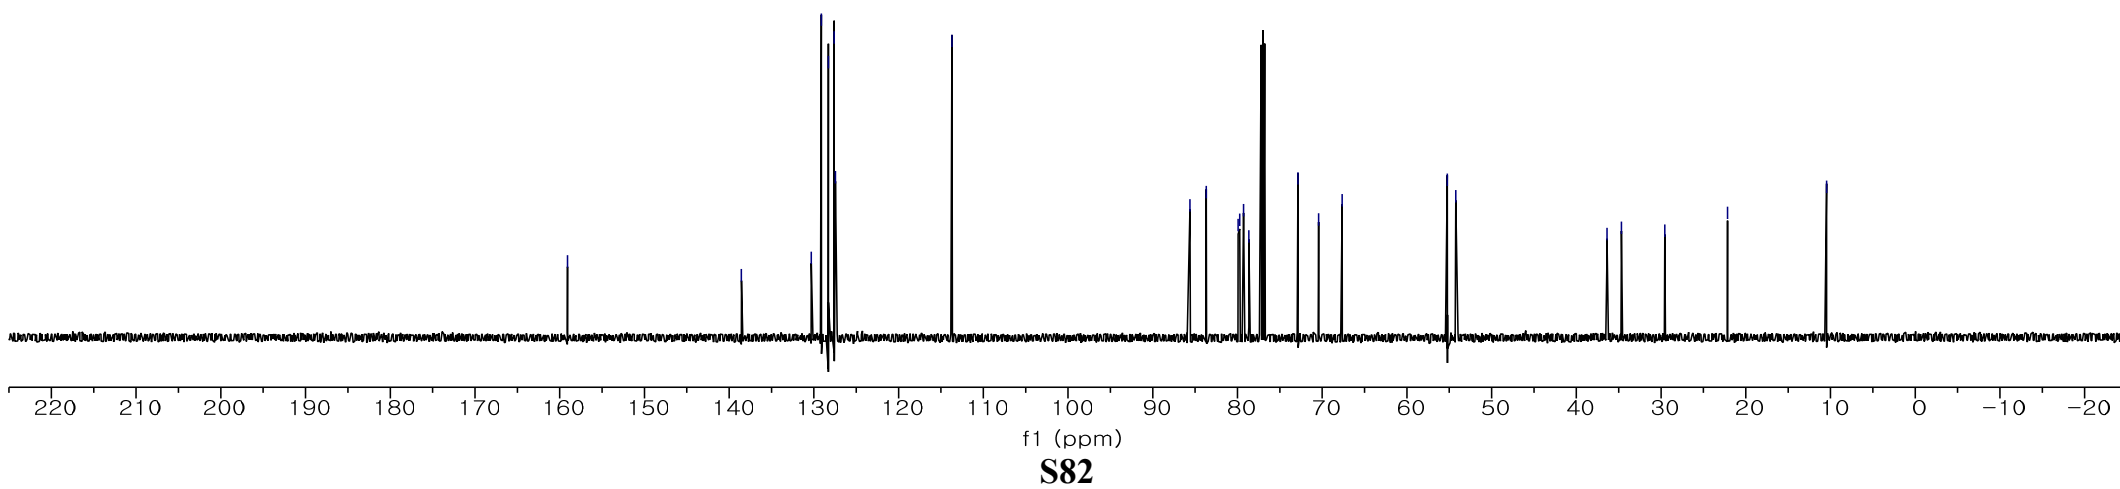

7.347900  
 7.34722K  
 7.3361  
 7.33562  
 7.33381  
 7.327514  
 7.3251  
 7.3191  
 7.3098  
 7.2859  
 7.2824  
 7.2778  
 7.2754  
 7.2715  
 7.2169  
 7.2136  
 7.2059  
 7.2025  
 6.8677  
 6.8643  
 6.8567  
 6.8533  
 4.5136  
 4.5102  
 4.4937  
 4.4911  
 4.4712  
 4.4512  
 4.2722  
 4.2529  
 4.1710  
 4.1596  
 4.1496  
 4.1382  
 3.9861  
 3.9781  
 3.9745  
 3.9706  
 3.9663  
 3.9630  
 3.9541  
 3.9219  
 3.9188  
 3.9149  
 3.9123  
 3.9088  
 3.8952  
 3.9047  
 3.8917  
 3.8881  
 3.8825  
 3.8657  
 3.8556  
 3.8519  
 3.8457  
 3.8420  
 3.8320  
 3.8020  
 3.5778  
 3.5667  
 3.5562  
 2.5009  
 2.4892  
 2.4777  
 2.4663  
 2.4549  
 2.3000  
 2.2914  
 2.2883  
 2.2797  
 2.2772  
 2.1943  
 2.1845  
 2.1805  
 2.1712  
 2.1617  
 2.1578  
 2.1479  
 2.0150  
 2.0049  
 1.9938  
 1.9846  
 1.9823  
 1.9731  
 1.9453  
 1.9415  
 1.9352  
 1.9314  
 1.9224  
 1.9186  
 1.9124  
 1.9084  
 1.6567  
 1.6488  
 1.6442  
 1.6363  
 1.5836  
 1.5828  
 1.5373  
 1.5253  
 1.5136  
 1.5020  
 1.4901  
 0.9903  
 0.9779  
 0.9654  
 0.0016

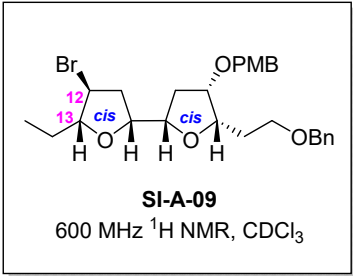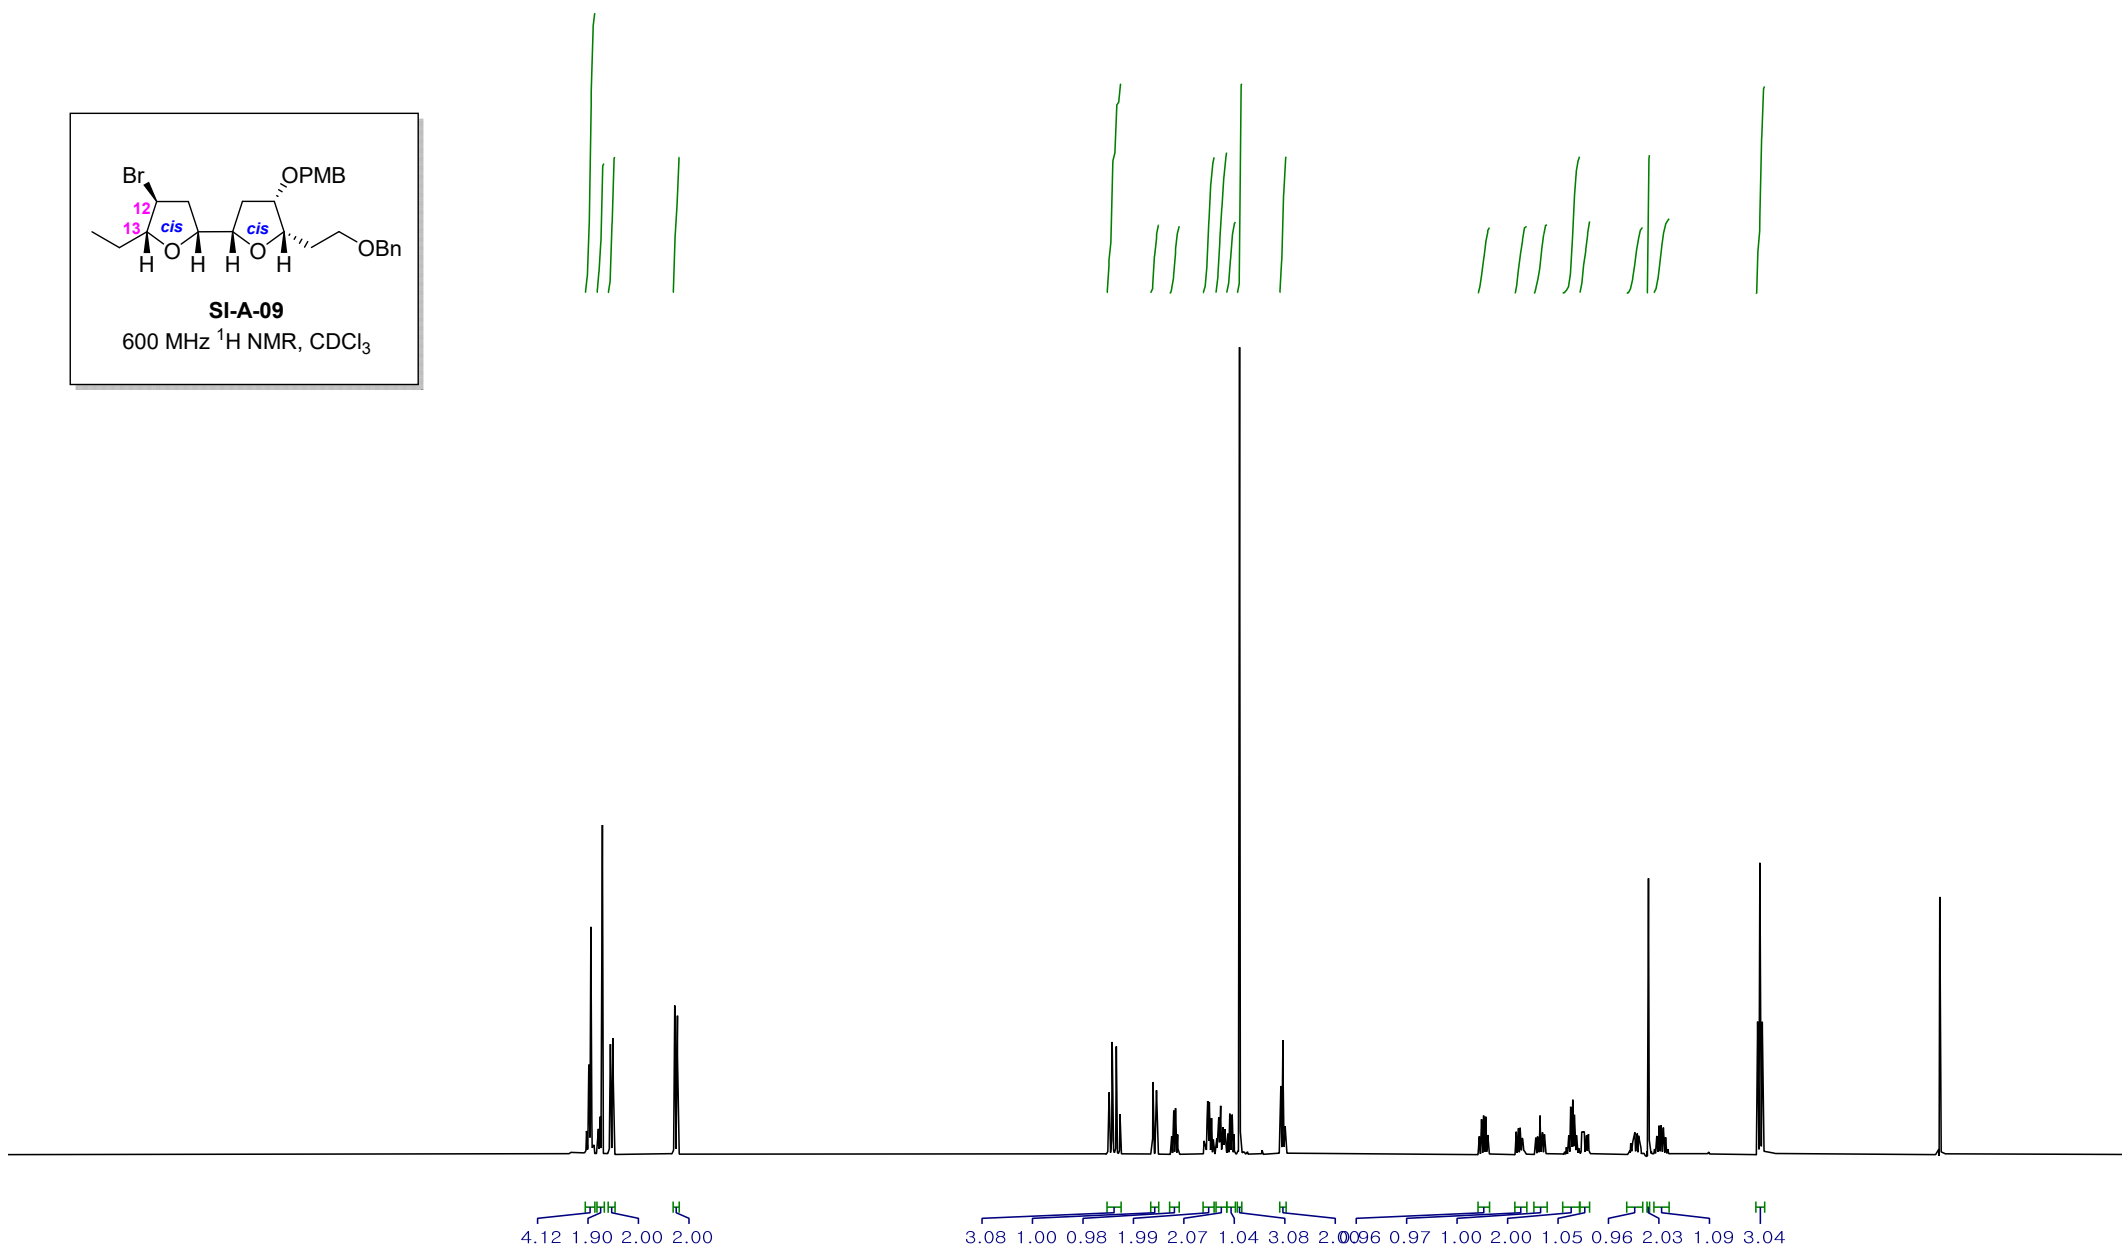

f1 (ppm)  
**S83**

SK-2-14-C  
single pulse decoupled gated NOE

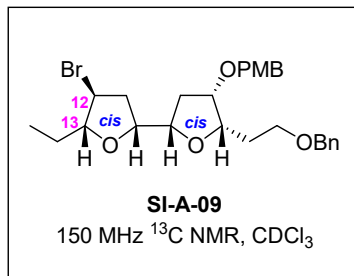

— 159.0877

— 138.5597

130.2630

129.0970

128.2803

127.5858

127.4394

— 113.7116

— 88.3697

80.2163

79.6905

79.0677

78.4707

72.8379

70.4131

67.6229

55.2558

55.2466

55.2364

55.2244

55.2102

55.1999

55.1901

— 49.3082

— 38.4877

— 34.5898

— 29.4906

— 26.5140

— 9.9512

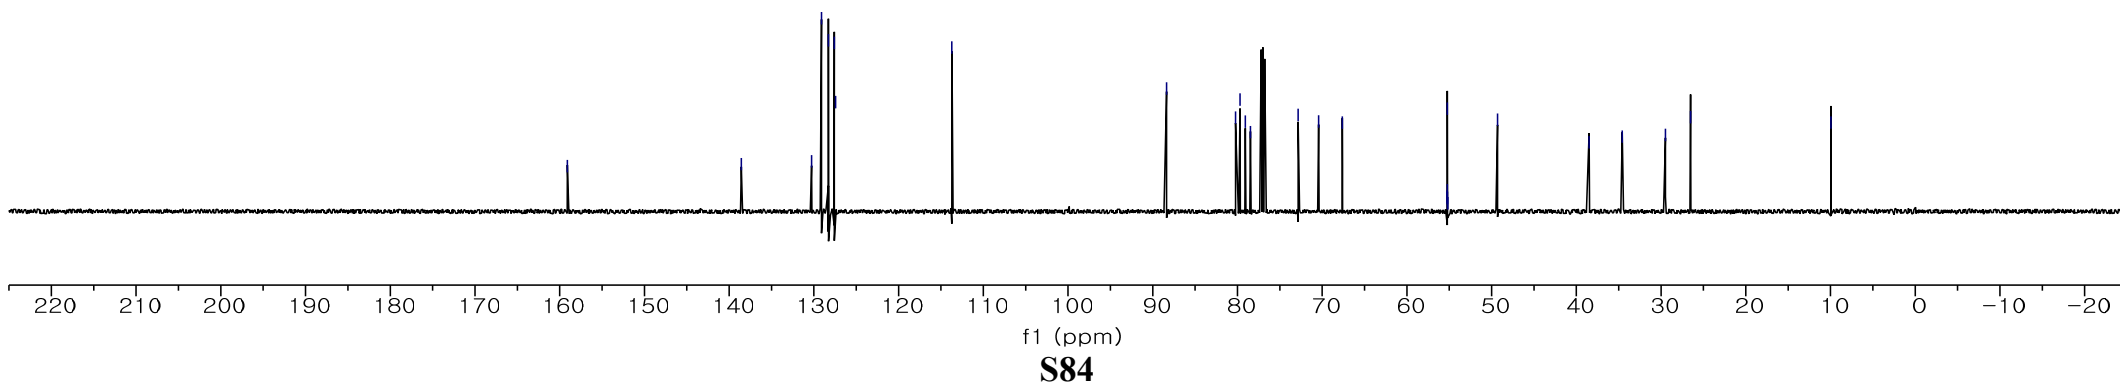

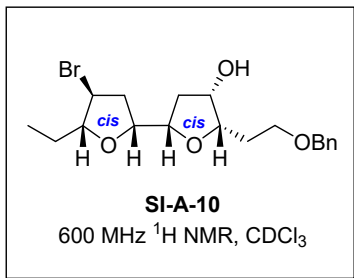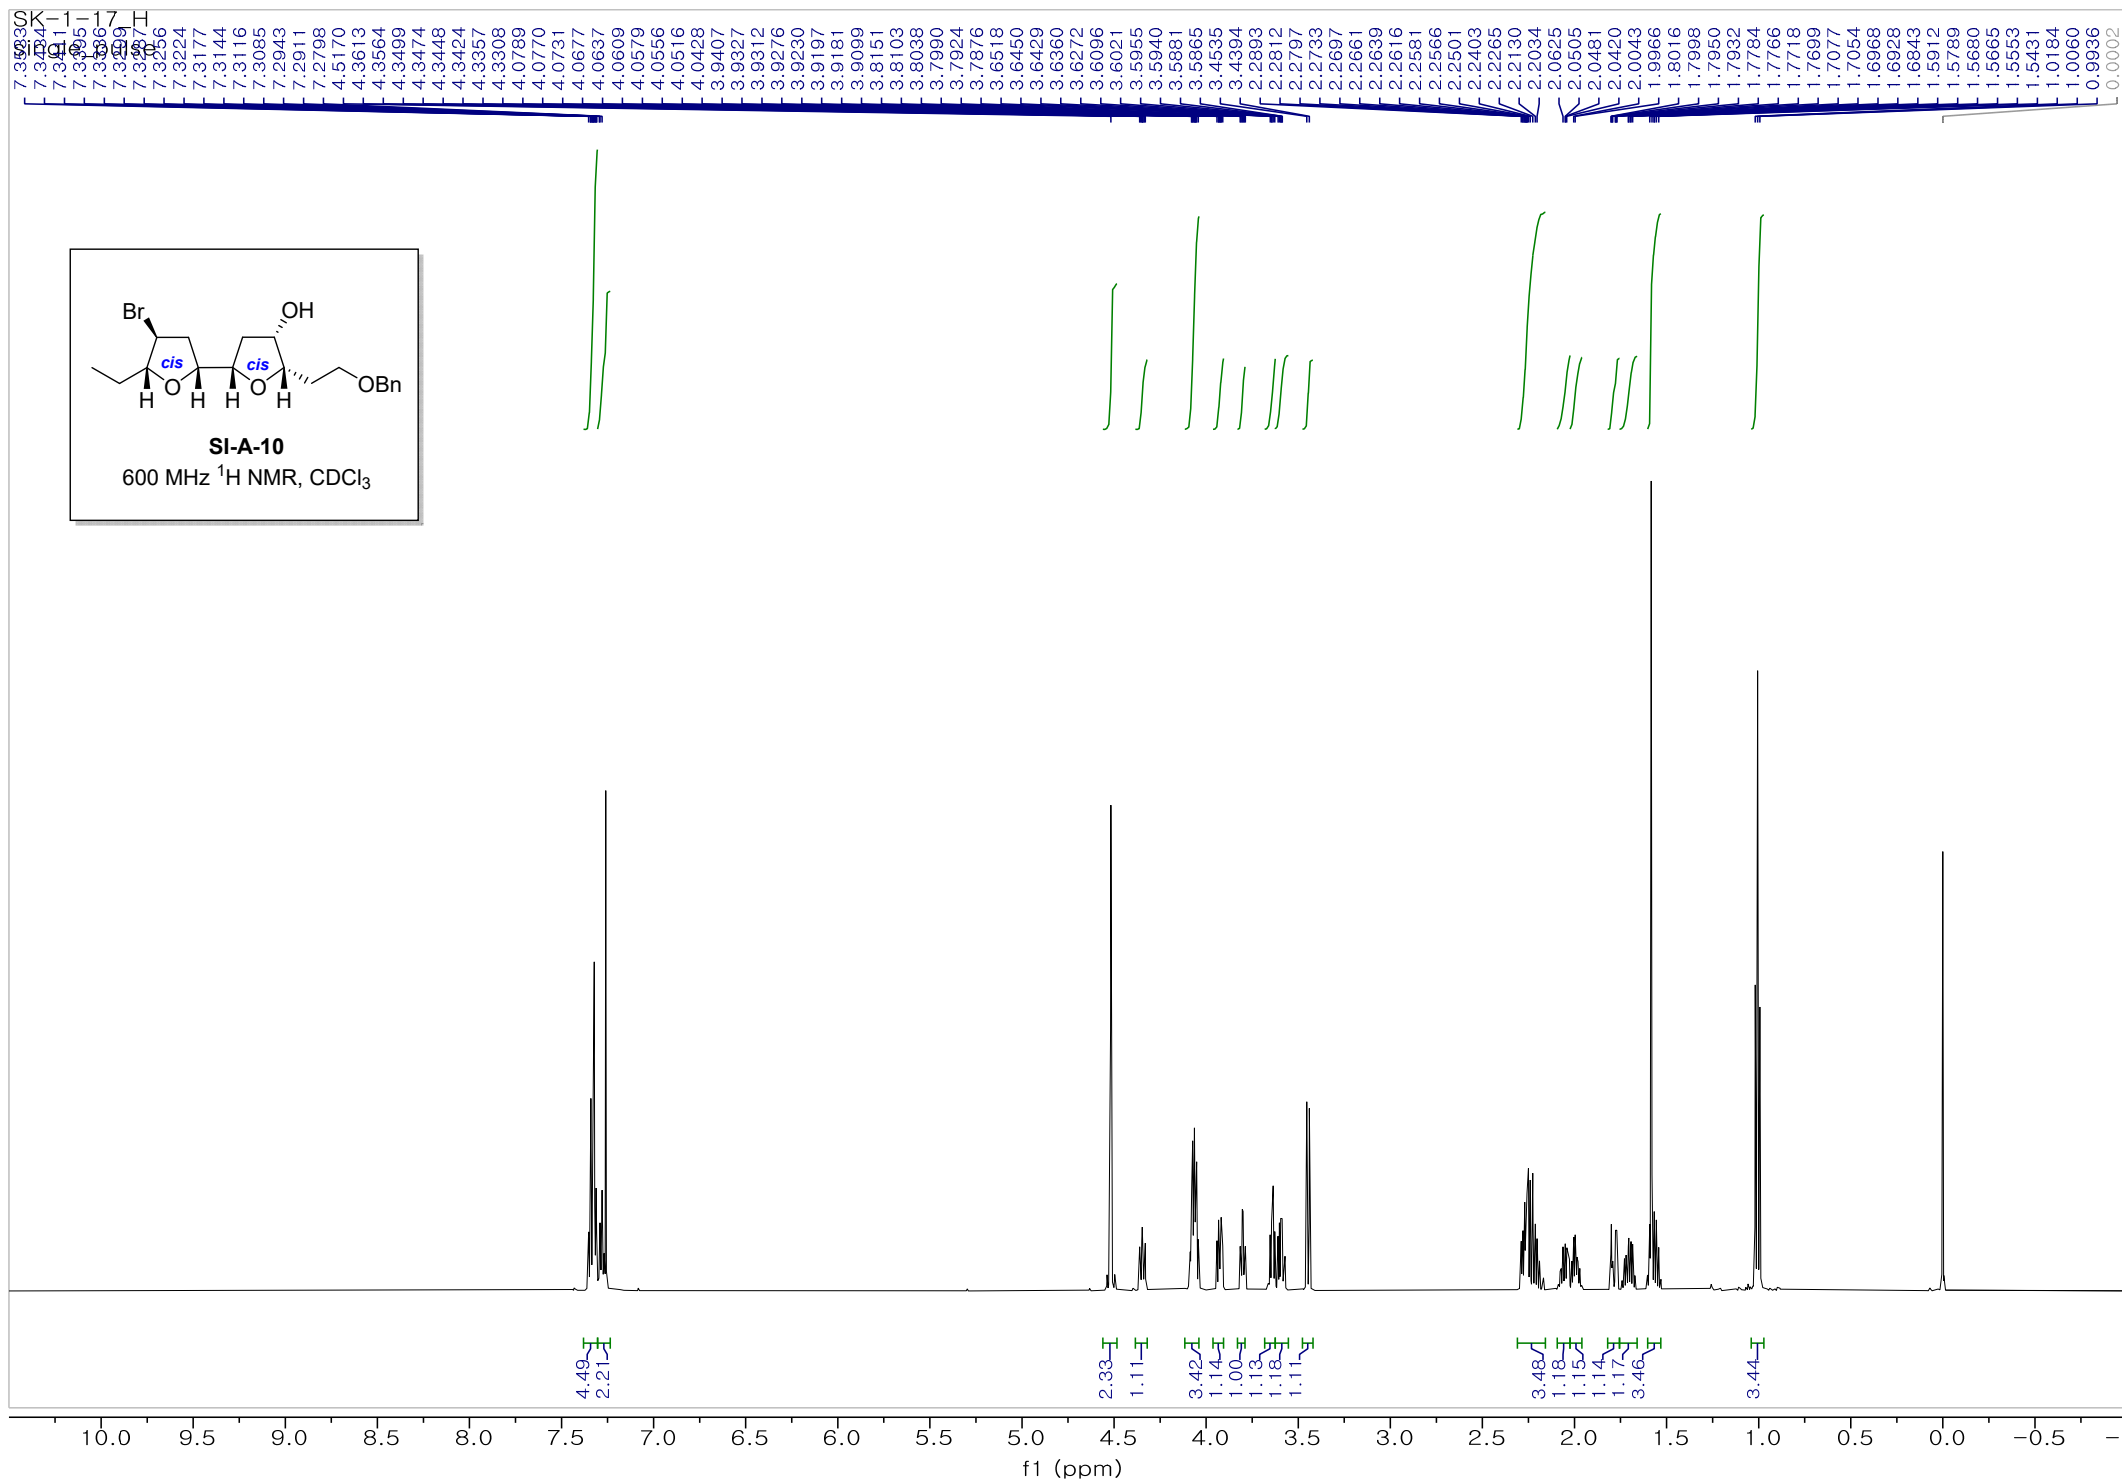

f1 (ppm)

S85

SK-1-17\_C  
single pulse decoupled gated NOE

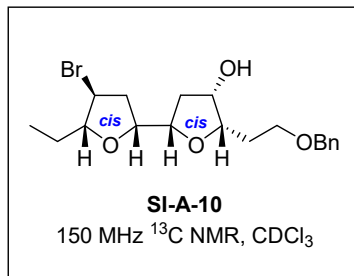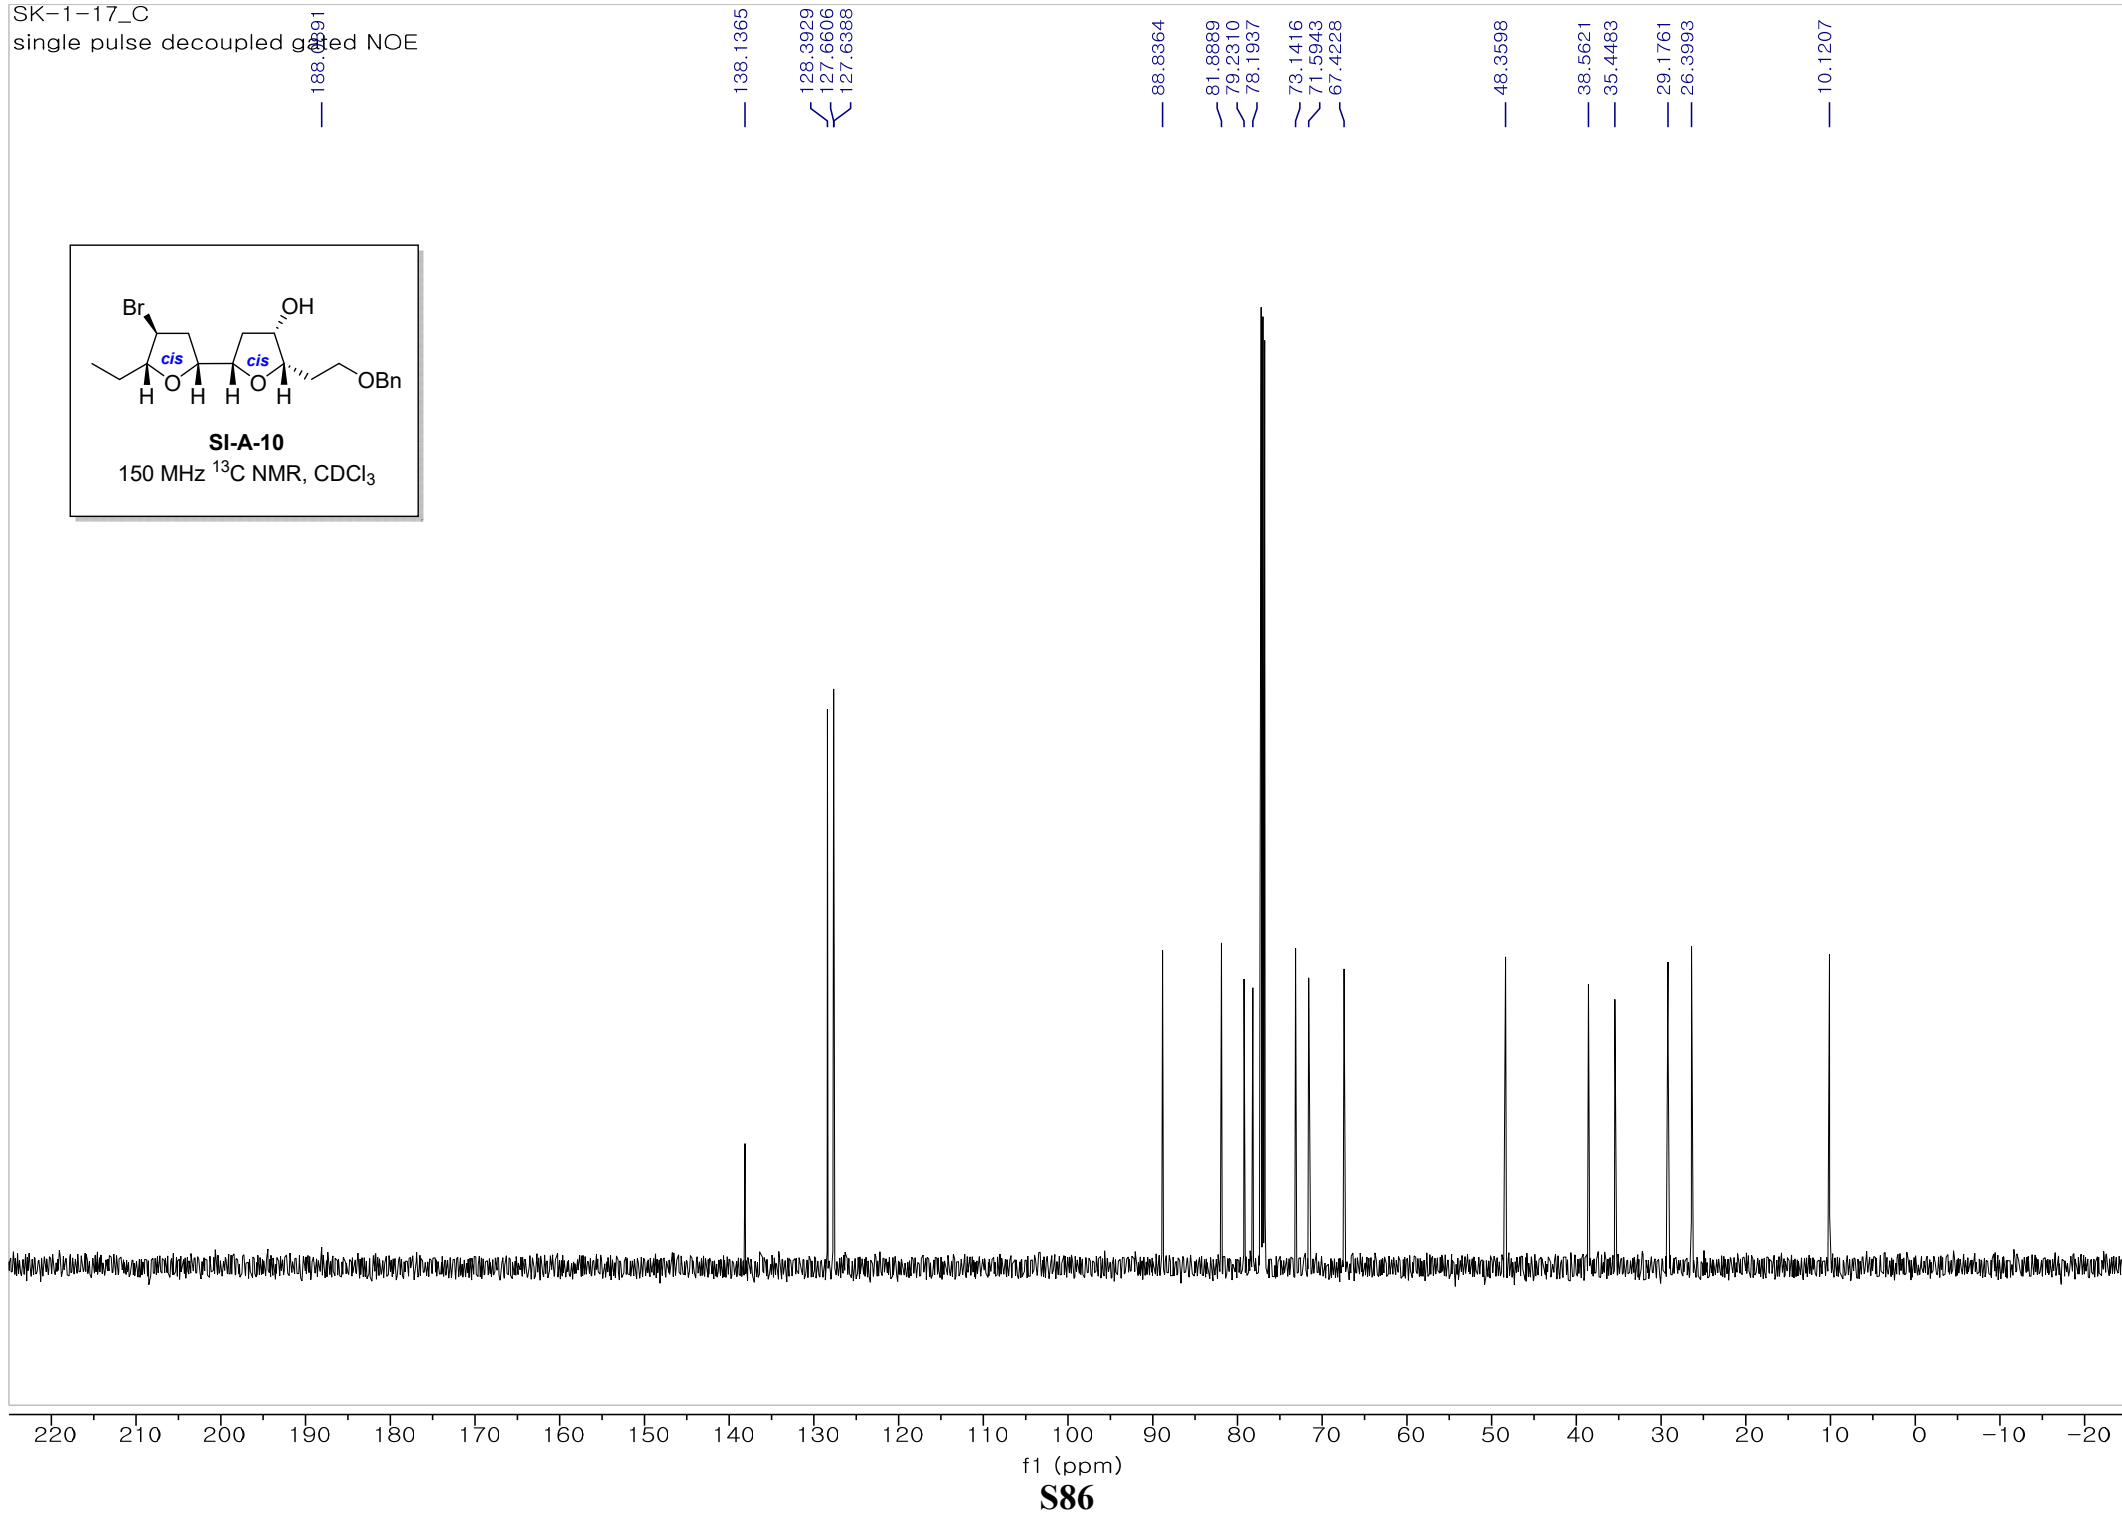

7.31900  
7.31821  
7.31742  
7.31664  
7.31585  
7.31506  
7.31427  
7.31348  
7.31269  
7.31190  
7.31111  
7.31032  
7.30953  
7.30874  
7.30795  
7.30716  
7.30637  
7.30558  
7.30479  
7.30400  
7.30321  
7.30242  
7.30163  
7.30084  
7.30005  
7.29926  
7.29847  
7.29768  
7.29689  
7.29610  
7.29531  
7.29452  
7.29373  
7.29294  
7.29215  
7.29136  
7.29057  
7.28978  
7.28899  
7.28820  
7.28741  
7.28662  
7.28583  
7.28504  
7.28425  
7.28346  
7.28267  
7.28188  
7.28109  
7.28030  
7.27951  
7.27872  
7.27793  
7.27714  
7.27635  
7.27556  
7.27477  
7.27398  
7.27319  
7.27240  
7.27161  
7.27082  
7.27003  
7.26924  
7.26845  
7.26766  
7.26687  
7.26608  
7.26529  
7.26450  
7.26371  
7.26292  
7.26213  
7.26134  
7.26055  
7.25976  
7.25897  
7.25818  
7.25739  
7.25660  
7.25581  
7.25502  
7.25423  
7.25344  
7.25265  
7.25186  
7.25107  
7.25028  
7.24949  
7.24870  
7.24791  
7.24712  
7.24633  
7.24554  
7.24475  
7.24396  
7.24317  
7.24238  
7.24159  
7.24080  
7.24001  
7.23922  
7.23843  
7.23764  
7.23685  
7.23606  
7.23527  
7.23448  
7.23369  
7.23290  
7.23211  
7.23132  
7.23053  
7.22974  
7.22895  
7.22816  
7.22737  
7.22658  
7.22579  
7.22500  
7.22421  
7.22342  
7.22263  
7.22184  
7.22105  
7.22026  
7.21947  
7.21868  
7.21789  
7.21710  
7.21631  
7.21552  
7.21473  
7.21394  
7.21315  
7.21236  
7.21157  
7.21078  
7.21000  
7.20921  
7.20842  
7.20763  
7.20684  
7.20605  
7.20526  
7.20447  
7.20368  
7.20289  
7.20210  
7.20131  
7.20052  
7.19973  
7.19894  
7.19815  
7.19736  
7.19657  
7.19578  
7.19499  
7.19420  
7.19341  
7.19262  
7.19183  
7.19104  
7.19025  
7.18946  
7.18867  
7.18788  
7.18709  
7.18630  
7.18551  
7.18472  
7.18393  
7.18314  
7.18235  
7.18156  
7.18077  
7.17998  
7.17919  
7.17840  
7.17761  
7.17682  
7.17603  
7.17524  
7.17445  
7.17366  
7.17287  
7.17208  
7.17129  
7.17050  
7.16971  
7.16892  
7.16813  
7.16734  
7.16655  
7.16576  
7.16497  
7.16418  
7.16339  
7.16260  
7.16181  
7.16102  
7.16023  
7.15944  
7.15865  
7.15786  
7.15707  
7.15628  
7.15549  
7.15470  
7.15391  
7.15312  
7.15233  
7.15154  
7.15075  
7.14996  
7.14917  
7.14838  
7.14759  
7.14680  
7.14601  
7.14522  
7.14443  
7.14364  
7.14285  
7.14206  
7.14127  
7.14048  
7.13969  
7.13890  
7.13811  
7.13732  
7.13653  
7.13574  
7.13495  
7.13416  
7.13337  
7.13258  
7.13179  
7.13100  
7.13021  
7.12942  
7.12863  
7.12784  
7.12705  
7.12626  
7.12547  
7.12468  
7.12389  
7.12310  
7.12231  
7.12152  
7.12073  
7.11994  
7.11915  
7.11836  
7.11757  
7.11678  
7.11599  
7.11520  
7.11441  
7.11362  
7.11283  
7.11204  
7.11125  
7.11046  
7.10967  
7.10888  
7.10809  
7.10730  
7.10651  
7.10572  
7.10493  
7.10414  
7.10335  
7.10256  
7.10177  
7.10098  
7.10019  
6.99940  
6.99861  
6.99782  
6.99703  
6.99624  
6.99545  
6.99466  
6.99387  
6.99308  
6.99229  
6.99150  
6.99071  
6.98992  
6.98913  
6.98834  
6.98755  
6.98676  
6.98597  
6.98518  
6.98439  
6.98360  
6.98281  
6.98202  
6.98123  
6.98044  
6.97965  
6.97886  
6.97807  
6.97728  
6.97649  
6.97570  
6.97491  
6.97412  
6.97333  
6.97254  
6.97175  
6.97096  
6.97017  
6.96938  
6.96859  
6.96780  
6.96701  
6.96622  
6.96543  
6.96464  
6.96385  
6.96306  
6.96227  
6.96148  
6.96069  
6.95990  
6.95911  
6.95832  
6.95753  
6.95674  
6.95595  
6.95516  
6.95437  
6.95358  
6.95279  
6.95200  
6.95121  
6.95042  
6.94963  
6.94884  
6.94805  
6.94726  
6.94647  
6.94568  
6.94489  
6.94410  
6.94331  
6.94252  
6.94173  
6.94094  
6.94015  
6.93936  
6.93857  
6.93778  
6.93699  
6.93620  
6.93541  
6.93462  
6.93383  
6.93304  
6.93225  
6.93146  
6.93067  
6.92988  
6.92909  
6.92830  
6.92751  
6.92672  
6.92593  
6.92514  
6.92435  
6.92356  
6.92277  
6.92198  
6.92119  
6.92040  
6.91961  
6.91882  
6.91803  
6.91724  
6.91645  
6.91566  
6.91487  
6.91408  
6.91329  
6.91250  
6.91171  
6.91092  
6.91013  
6.90934  
6.90855  
6.90776  
6.90697  
6.90618  
6.90539  
6.90460  
6.90381  
6.90302  
6.90223  
6.90144  
6.90065  
6.90000  
6.89935  
6.89870  
6.89805  
6.89740  
6.89675  
6.89610  
6.89545  
6.89480  
6.89415  
6.89350  
6.89285  
6.89220  
6.89155  
6.89090  
6.89025  
6.88960  
6.88895  
6.88830  
6.88765  
6.88700  
6.88635  
6.88570  
6.88505  
6.88440  
6.88375  
6.88310  
6.88245  
6.88180  
6.88115  
6.88050  
6.87985  
6.87920  
6.87855  
6.87790  
6.87725  
6.87660  
6.87595  
6.87530  
6.87465  
6.87400  
6.87335  
6.87270  
6.87205  
6.87140  
6.87075  
6.87010  
6.86945  
6.86880  
6.86815  
6.86750  
6.86685  
6.86620  
6.86555  
6.86490  
6.86425  
6.86360  
6.86295  
6.86230  
6.86165  
6.86100  
6.86035  
6.85970  
6.85905  
6.85840  
6.85775  
6.85710  
6.85645  
6.85580  
6.85515  
6.85450  
6.85385  
6.85320  
6.85255  
6.85190  
6.85125  
6.85060  
6.84995  
6.84930  
6.84865  
6.84800  
6.84735  
6.84670  
6.84605  
6.84540  
6.84475  
6.84410  
6.84345  
6.84280  
6.84215  
6.84150  
6.84085  
6.84020  
6.83955  
6.83890  
6.83825  
6.83760  
6.83695  
6.83630  
6.83565  
6.83500  
6.83435  
6.83370  
6.83305  
6.83240  
6.83175  
6.83110  
6.83045  
6.82980  
6.82915  
6.82850  
6.82785  
6.82720  
6.82655  
6.82590  
6.82525  
6.82460  
6.82395  
6.82330  
6.82265  
6.82200  
6.82135  
6.82070  
6.82005  
6.81940  
6.81875  
6.81810  
6.81745  
6.81680  
6.81615  
6.81550  
6.81485  
6.81420  
6.81355  
6.81290  
6.81225  
6.81160  
6.81095  
6.81030  
6.80965  
6.80900  
6.80835  
6.80770  
6.80705  
6.80640  
6.80575  
6.80510  
6.80445  
6.80380  
6.80315  
6.80250  
6.80185  
6.80120  
6.80055  
6.79990  
6.79925  
6.79860  
6.79795  
6.79730  
6.79665  
6.79600  
6.79535  
6.79470  
6.79405  
6.79340  
6.79275  
6.79210  
6.79145  
6.79080  
6.79015  
6.78950  
6.78885  
6.78820  
6.78755  
6.78690  
6.78625  
6.78560  
6.78495  
6.78430  
6.78365  
6.78300  
6.78235  
6.78170  
6.78105  
6.78040  
6.77975  
6.77910  
6.77845  
6.77780  
6.77715  
6.77650  
6.77585  
6.77520  
6.77455  
6.77390  
6.77325  
6.77260  
6.77195  
6.77130  
6.77065  
6.77000  
6.76935  
6.76870  
6.76805  
6.76740  
6.76675  
6.76610  
6.76545  
6.76480  
6.76415  
6.76350  
6.76285  
6.76220  
6.76155  
6.76090  
6.76025  
6.75960  
6.75895  
6.75830  
6.75765  
6.75700  
6.75635  
6.75570  
6.75505  
6.75440  
6.75375  
6.75310  
6.75245  
6.75180  
6.75115  
6.75050  
6.74985  
6.74920  
6.74855  
6.74790  
6.74725  
6.74660  
6.74595  
6.74530  
6.74465  
6.74400  
6.74335  
6.74270  
6.74205  
6.74140  
6.74075  
6.74010  
6.73945  
6.73880  
6.73815  
6.73750  
6.73685  
6.73620  
6.73555  
6.73490  
6.73425  
6.73360  
6.73295  
6.73230  
6.73165  
6.73100  
6.73035  
6.72970  
6.72905  
6.72840  
6.72775  
6.72710  
6.72645  
6.72580  
6.72515  
6.72450  
6.72385  
6.72320  
6.72255  
6.72190  
6.72125  
6.72060  
6.71995  
6.71930  
6.71865  
6.71800  
6.71735  
6.71670  
6.71605  
6.71540  
6.71475  
6.71410  
6.71345  
6.71280  
6.71215  
6.71150  
6.71085  
6.71020  
6.70955  
6.70890  
6.70825  
6.70760  
6.70695  
6.70630  
6.70565  
6.70500  
6.70435  
6.70370  
6.70305  
6.70240  
6.70175  
6.70110  
6.70045  
6.69980  
6.69915  
6.69850  
6.69785  
6.69720  
6.69655  
6.69590  
6.69525  
6.69460  
6.69395  
6.69330  
6.69265  
6.69200  
6.69135  
6.69070  
6.69005  
6.68940  
6.68875  
6.68810  
6.68745  
6.68680  
6.68615  
6.68550  
6.68485  
6.68420  
6.68355  
6.68290  
6.68225  
6.68160  
6.68095  
6.68030  
6.67965  
6.67900  
6.67835  
6.67770  
6.67705  
6.67640  
6.67575  
6.67510  
6.67445  
6.67380  
6.67315  
6.67250  
6.67185  
6.67120  
6.67055  
6.66990  
6.66925  
6.66860  
6.66795  
6.66730  
6.66665  
6.66600  
6.66535  
6.66470  
6.66405  
6.66340  
6.66275  
6.66210  
6.66145  
6.66080  
6.66015  
6.65950  
6.65885  
6.65820  
6.65755  
6.65690  
6.65625  
6.65560  
6.65495  
6.65430  
6.65365  
6.65300  
6.65235  
6.65170  
6.65105  
6.65040  
6.64975  
6.64910  
6.64845  
6.64780  
6.64715  
6.64650  
6.64585  
6.64520  
6.64455  
6.64390  
6.64325  
6.64260  
6.64195  
6.64130  
6.64065  
6.64000  
6.63935  
6.63870  
6.63805  
6.63740  
6.63675  
6.63610  
6.63545  
6.63480  
6.63415  
6.63350  
6.63285  
6.63220  
6.63155  
6.63090  
6.63025  
6.62960  
6.62895  
6.62830  
6.62765  
6.62700  
6.62635  
6.62570  
6.62505  
6.62440  
6.62375  
6.62310  
6.62245  
6.62180  
6.62115  
6.62050  
6.61985  
6.61920  
6.61855  
6.61790  
6.61725  
6.61660  
6.61595  
6.61530  
6.61465  
6.61400  
6.61335  
6.61270  
6.61205  
6.61140  
6.61075  
6.61010  
6.60945  
6.60880  
6.60815  
6.60750  
6.60685  
6.60620  
6.60555  
6.60490  
6.60425  
6.60360  
6.60295  
6.60230  
6.60165  
6.60100  
6.60035  
6.59970  
6.59905  
6.59840  
6.59775  
6.59710  
6.59645  
6.59580  
6.59515  
6.59450  
6.59385  
6.59320  
6.59255  
6.59190  
6.59125  
6.59060  
6.58995  
6.58930  
6.58865  
6.58800  
6.58735  
6.58670  
6.58605  
6.58540  
6.58475  
6.58410  
6.58345  
6.58280  
6.58215  
6.58150  
6.58085  
6.58020  
6.57955  
6.57890  
6.57825  
6.57760  
6.57695  
6.57630  
6.57565  
6.57500  
6.57435  
6.57370  
6.57305  
6.57240  
6.57175  
6.57110  
6.57045  
6.56980  
6.56915  
6.56850  
6.56785  
6.56720  
6.56655  
6.56590  
6.56525  
6.56460  
6.56395  
6.56330  
6.56265  
6.56200  
6.56135  
6.56070  
6.56005  
6.55940  
6.55875  
6.55810  
6.55745  
6.55680  
6.55615  
6.55550  
6.55485  
6.55420  
6.55355  
6.55290  
6.55225  
6.55160  
6.55095  
6.55030  
6.54965  
6.54900  
6.54835  
6.54770  
6.54705  
6.54640  
6.54575  
6.54510  
6.54445  
6.54380  
6.54315  
6.54250  
6.54185  
6.54120  
6.54055  
6.53990  
6.53925  
6.53860  
6.53795  
6.53730  
6.53665  
6.53600  
6.53535  
6.53470  
6.53405  
6.53340  
6.53275  
6.53210  
6.53145  
6.53080  
6.53015  
6.52950  
6.52885  
6.52820  
6.52755  
6.52690  
6.52625  
6.52560  
6.52495  
6.52430  
6.52365  
6.52300  
6.52235  
6.52170  
6.52105  
6.52040  
6.51975  
6.51910  
6.51845  
6.51780  
6.51715  
6.51650  
6.51585  
6.51520  
6.51455  
6.51390  
6.51325  
6.51260  
6.51195  
6.51130  
6.51065  
6.51000  
6.50935  
6.50870  
6.50805  
6.50740  
6.50675  
6.50610  
6.50545  
6.50480  
6.50415  
6.50350  
6.50285  
6.50220  
6.50155  
6.50090  
6.50025  
6.49960  
6.49895  
6.49830  
6.49765  
6.49700  
6.49635  
6.49570  
6.49505  
6.49440  
6.49375  
6.49310  
6.49245  
6.49180  
6.49115  
6.49050  
6.48985  
6.48920  
6.48855  
6.48790  
6.48725  
6.48660  
6.48595  
6.48530  
6.48465  
6.48400  
6.48335  
6.48270  
6.48205  
6.48140  
6.48075  
6.48010  
6.47945  
6.47880  
6.47815  
6.47750  
6.47685  
6.47620  
6.47555  
6.47490  
6.47425  
6.47360  
6.47295  
6.47230  
6.47165  
6.47100  
6.47035  
6.46970  
6.46905  
6.46840  
6.46775  
6.46710  
6.46645  
6.46580  
6.46515  
6.46450  
6.46385  
6.46320  
6.46255  
6.46190  
6.46125  
6.46060  
6.45995  
6.45930  
6.45865  
6.45800  
6.45735  
6.45670  
6.45605  
6.45540  
6.45475  
6.45410  
6.45345  
6.45280  
6.45215  
6.45150  
6.45085  
6.45020  
6.44955  
6.44890  
6.44825  
6.44760  
6.44695  
6.44630  
6.44565  
6.44500  
6.44435  
6.44370  
6.44305  
6.44240  
6.44175  
6.44110  
6.44045  
6.43980  
6.43915  
6.43850  
6.43785  
6.43720  
6.43655  
6.43590  
6.43525  
6.43460  
6.43395  
6.43330  
6.43265  
6.43200  
6.43135  
6.43070  
6.43005  
6.42940  
6.42875  
6.42810  
6.42745  
6.42680  
6.42615  
6.42550  
6.42485  
6.42420  
6.42355  
6.42290  
6.42225  
6.42160  
6.42095  
6.42030  
6.41965  
6.41900  
6.41835  
6.41770  
6.41705  
6.41640  
6.41575  
6.41510  
6.41445  
6.41380  
6.41315  
6.41250  
6.41185  
6.41120  
6.41055  
6.40990  
6.40925  
6.40860  
6.40795  
6.40730  
6.40665  
6.40600  
6.40535  
6.40470  
6.40405  
6.40340  
6.40275  
6.40210  
6.40145  
6.40080  
6.40015  
6.39950  
6.39885  
6.39820  
6.39755  
6.39690  
6.39625  
6.39560  
6.39495  
6.39430  
6.39365  
6.39300  
6.39235  
6.39170  
6.39105  
6.39040  
6.38975  
6.38910  
6.38845  
6.38780  
6.38715  
6.38650  
6.38585  
6.38520  
6.38455  
6.38390  
6.38325  
6.38260  
6.38195  
6.38130  
6.38065  
6.38000  
6.37935  
6.37870  
6.37805  
6.37740  
6.37675  
6.37610  
6.37545  
6.37480  
6.37415  
6.37350  
6.37285  
6.37220  
6.37155  
6.37090  
6.37025  
6.36960  
6.36895  
6.36830  
6.36765  
6.36700  
6.36635  
6.36570  
6.36505  
6.36440  
6.36375  
6.36310  
6.36245  
6.36180  
6.36115  
6.36050  
6.35985  
6.35920  
6.35855  
6.35790  
6.35725  
6.35660  
6.35595  
6.35530  
6.35465  
6.35400  
6.35335  
6.35270  
6.35205  
6.35140  
6.35075  
6.35010  
6.34945  
6.34880  
6.34815  
6.34750  
6.34685  
6.34620  
6.34555  
6.34490  
6.34425  
6.34360  
6.34295  
6.34230  
6.34165  
6.34100  
6.34035  
6.33970  
6.33905  
6.33840  
6.33775  
6.33710  
6.33645  
6.33580  
6.33515  
6.33450  
6.33385  
6.33320  
6.33255  
6.33190  
6.33125  
6.33060  
6.32995  
6.32930  
6.32865  
6.32800  
6.32735  
6.32670  
6.32605  
6.32540  
6.32475  
6.32410  
6.32345  
6.32280  
6.32215  
6.32150  
6.32085  
6.32020  
6.31955  
6.31890  
6.31825  
6.31760  
6.31695  
6.31630  
6.31565  
6.31500  
6.31435  
6.31370  
6.31305  
6.31240  
6.31175  
6.31110  
6.31045  
6.30980  
6.30915  
6.30850  
6.30785  
6.30720  
6.30655  
6.30590  
6.30525  
6.30460  
6.30395  
6.30330  
6.30265  
6.30200  
6.30135  
6.30070  
6.30005  
6.29940  
6.29875  
6.29810  
6.29745  
6.29680  
6.29615  
6.29550  
6.29485  
6.29420  
6.29355  
6.29290  
6.29225  
6.29160  
6.29095  
6.29030  
6.28965  
6.28900  
6.28835  
6.28770  
6.28705  
6.28640  
6.28575  
6.28510  
6.28445  
6.28380  
6.28315  
6.28250  
6.28185  
6.28120  
6.28055  
6.27990  
6.27925  
6.27860  
6.27795  
6.27730  
6.27665  
6.27600  
6.27535  
6.27470  
6.27405  
6.27340  
6.27275  
6.27210  
6.27145  
6.2708

SK-2-18\_C  
single pulse decoupled gated NOE

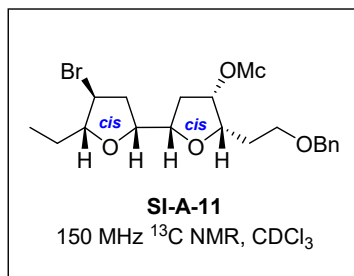

— 138.2982

128.5185  
127.8535  
127.8077

— 88.6855  
— 85.7514

79.6227  
79.4856  
78.8966

— 73.2243

— 67.0111

— 54.2150  
— 48.9970

38.6612  
36.8226

— 29.3494  
— 26.6735

— 10.0048

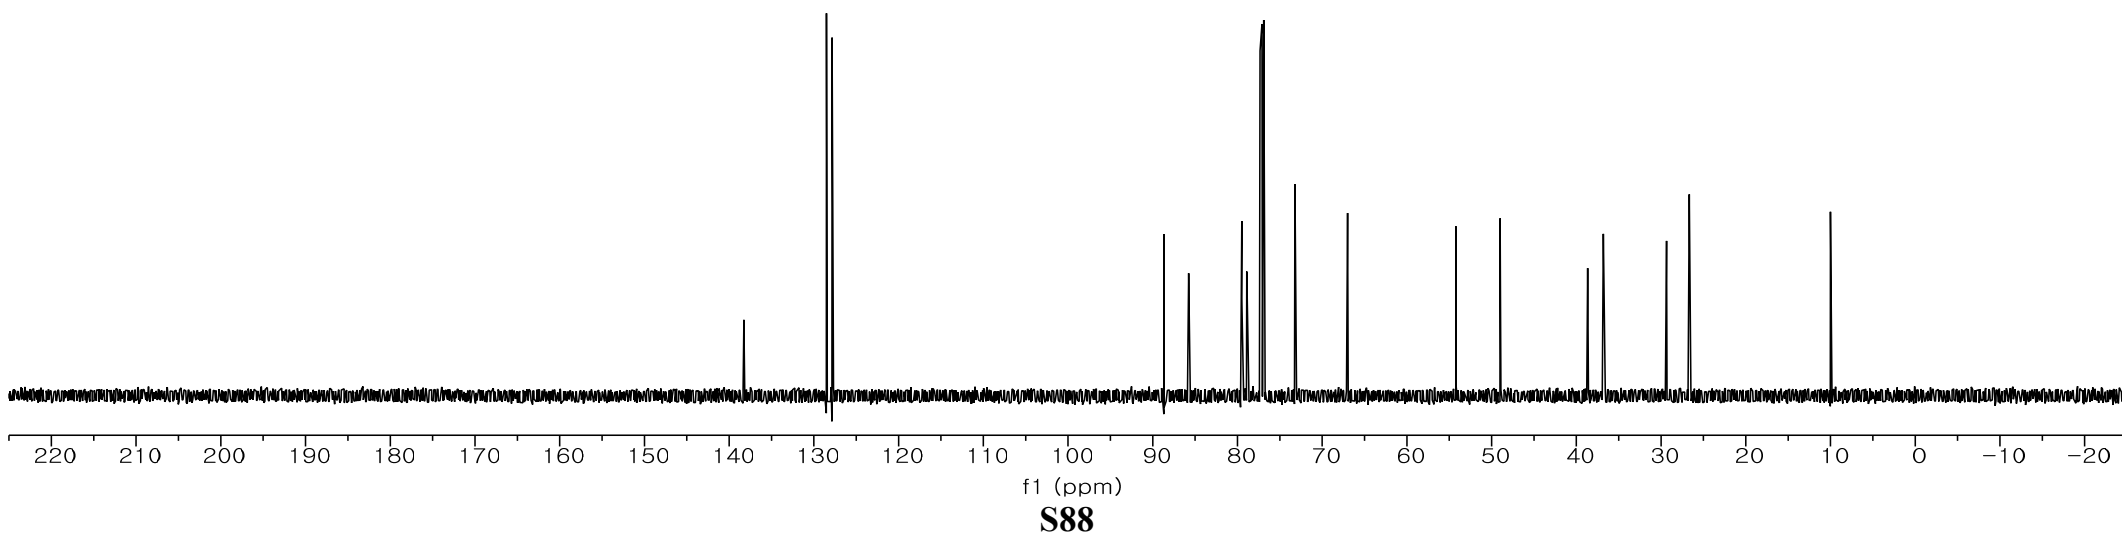



SK-2-19\_H  
single\_pulse

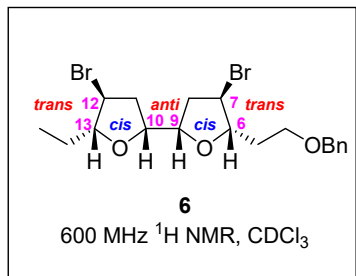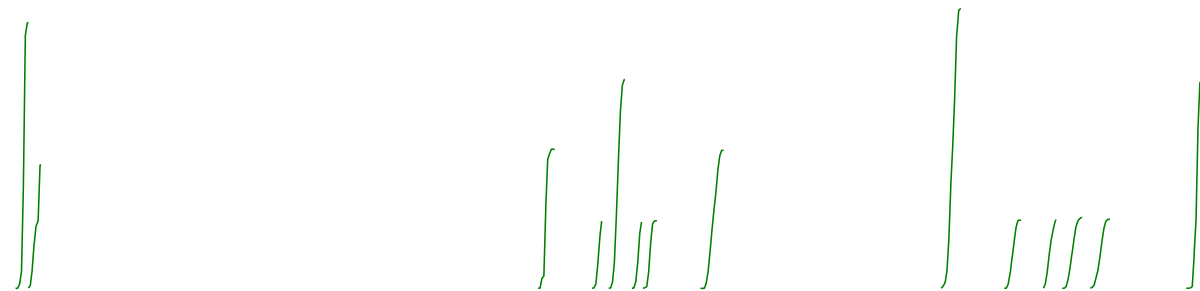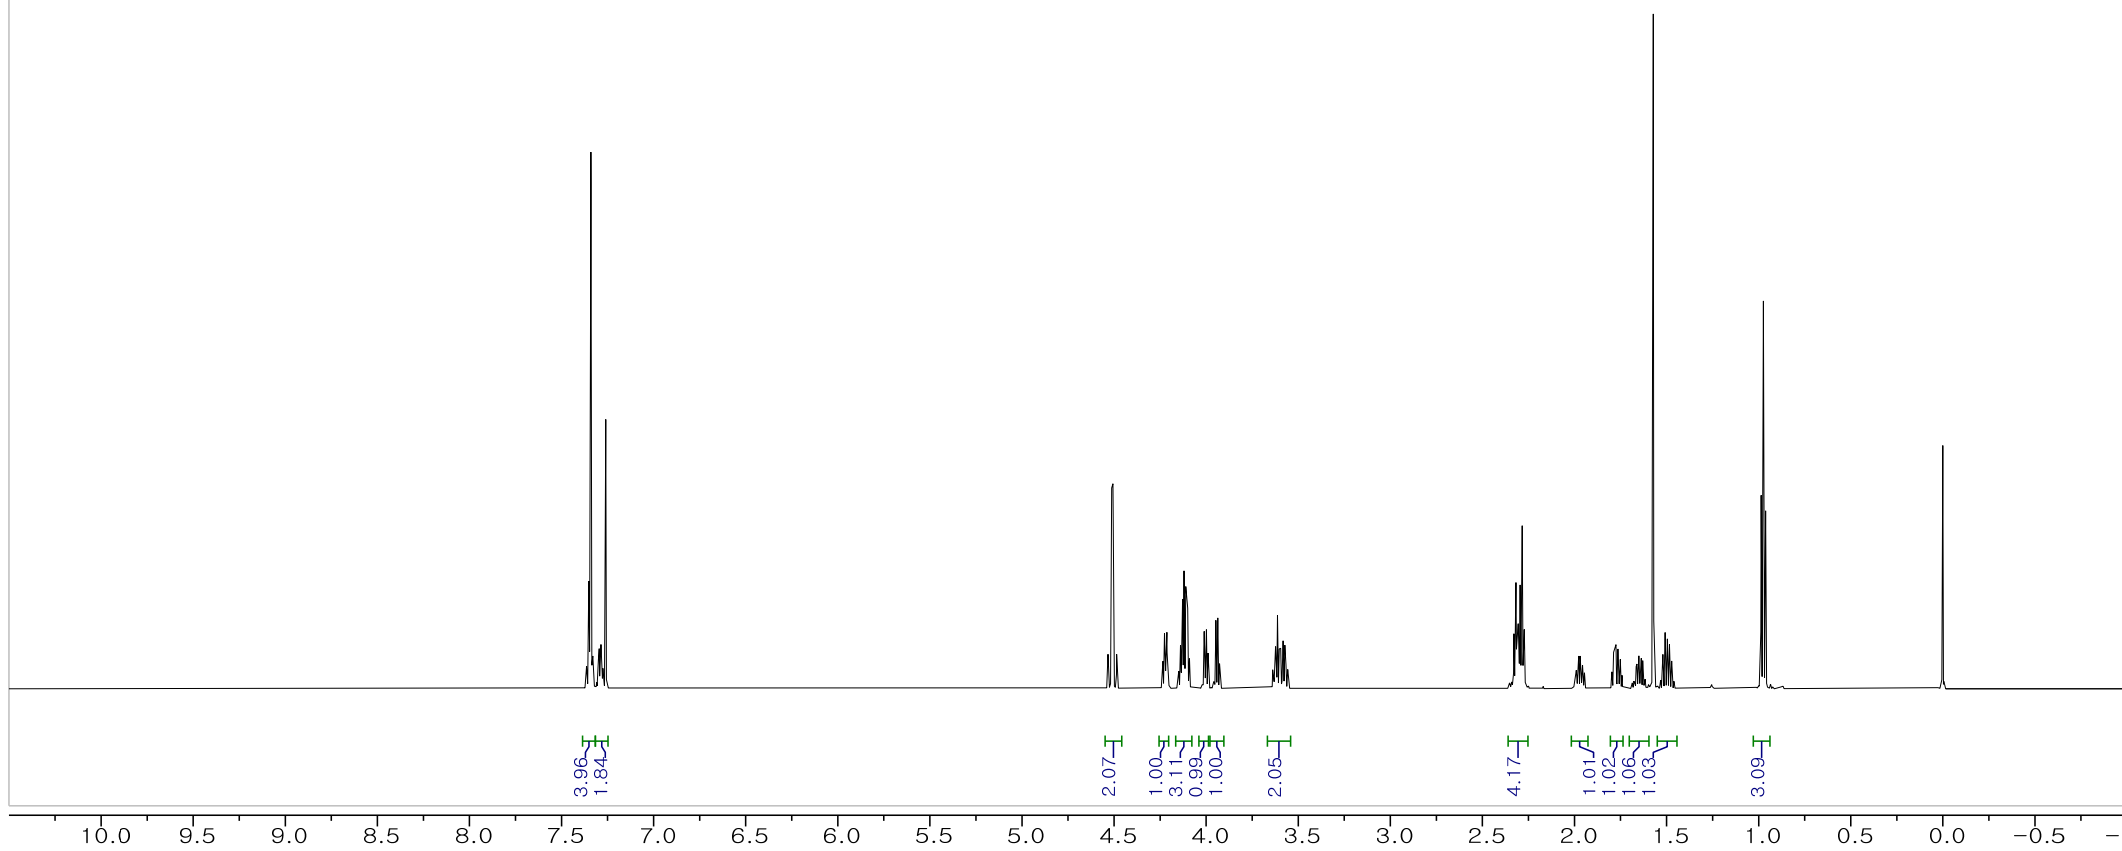

f1 (ppm)  
**S89**

SK-2-19\_C

single pulse decoupled gated NOE

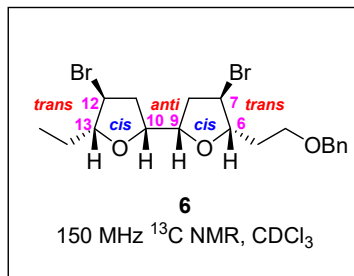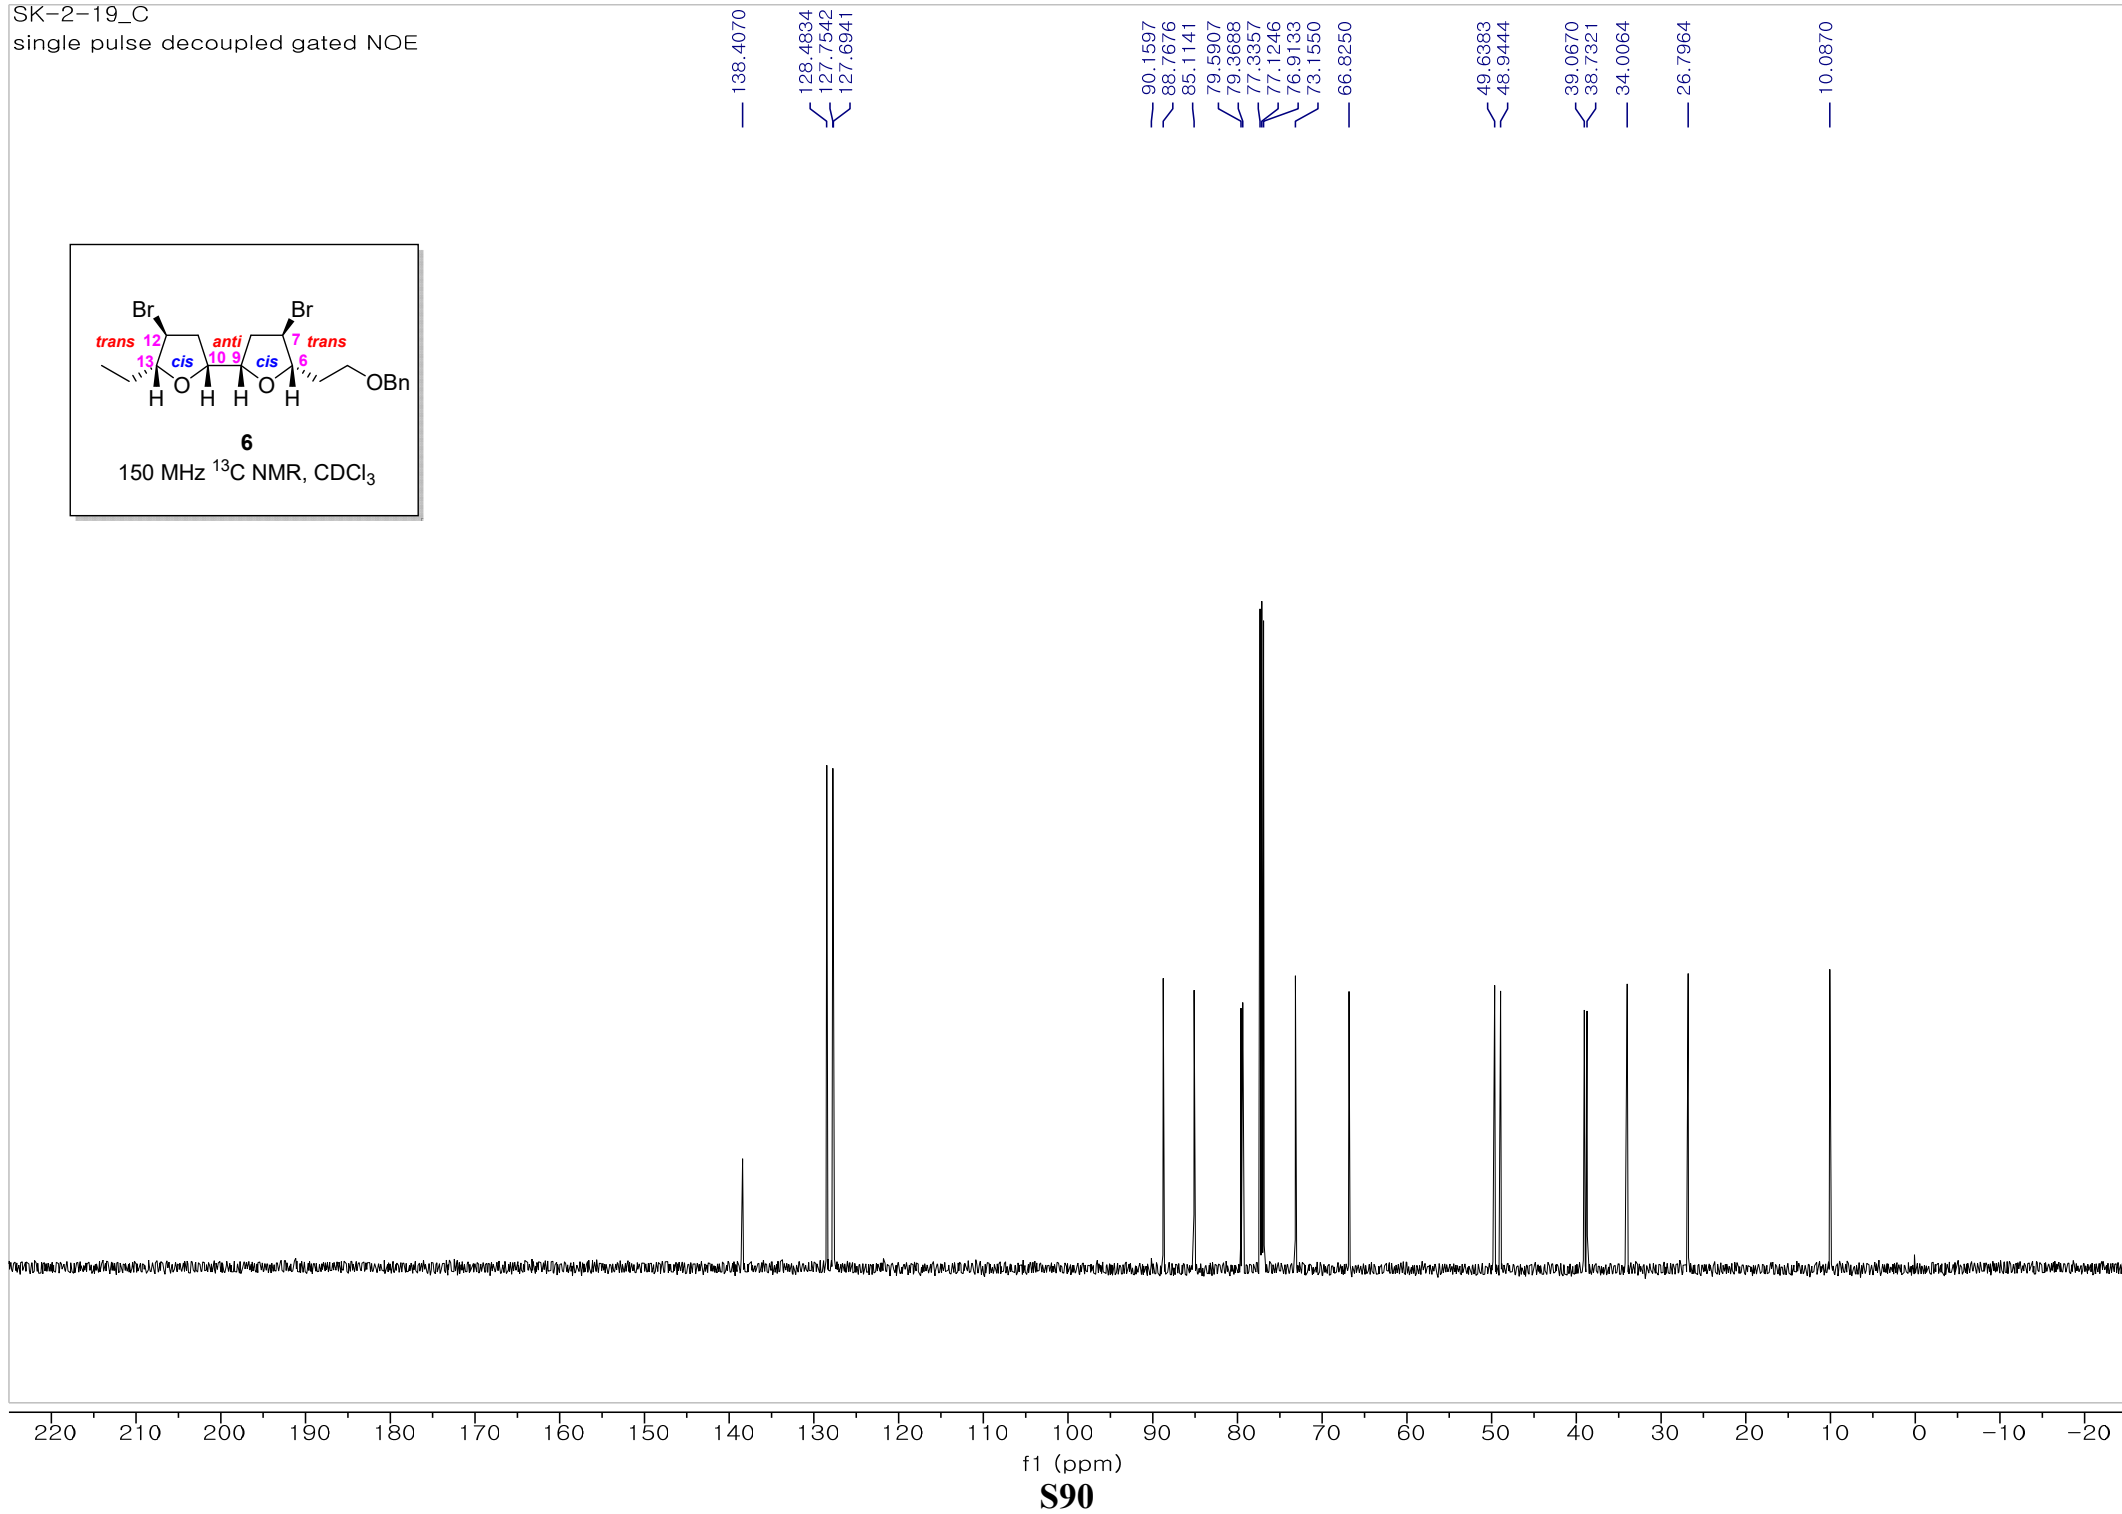

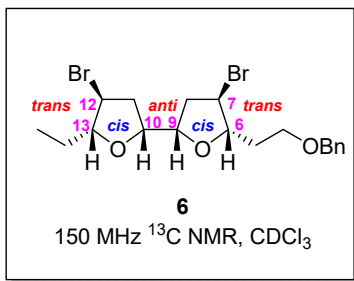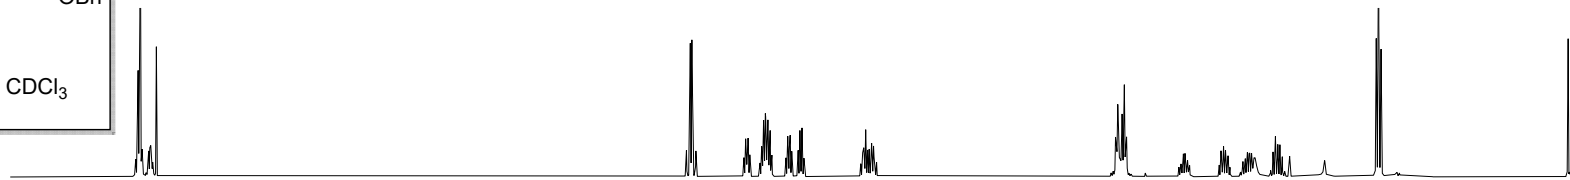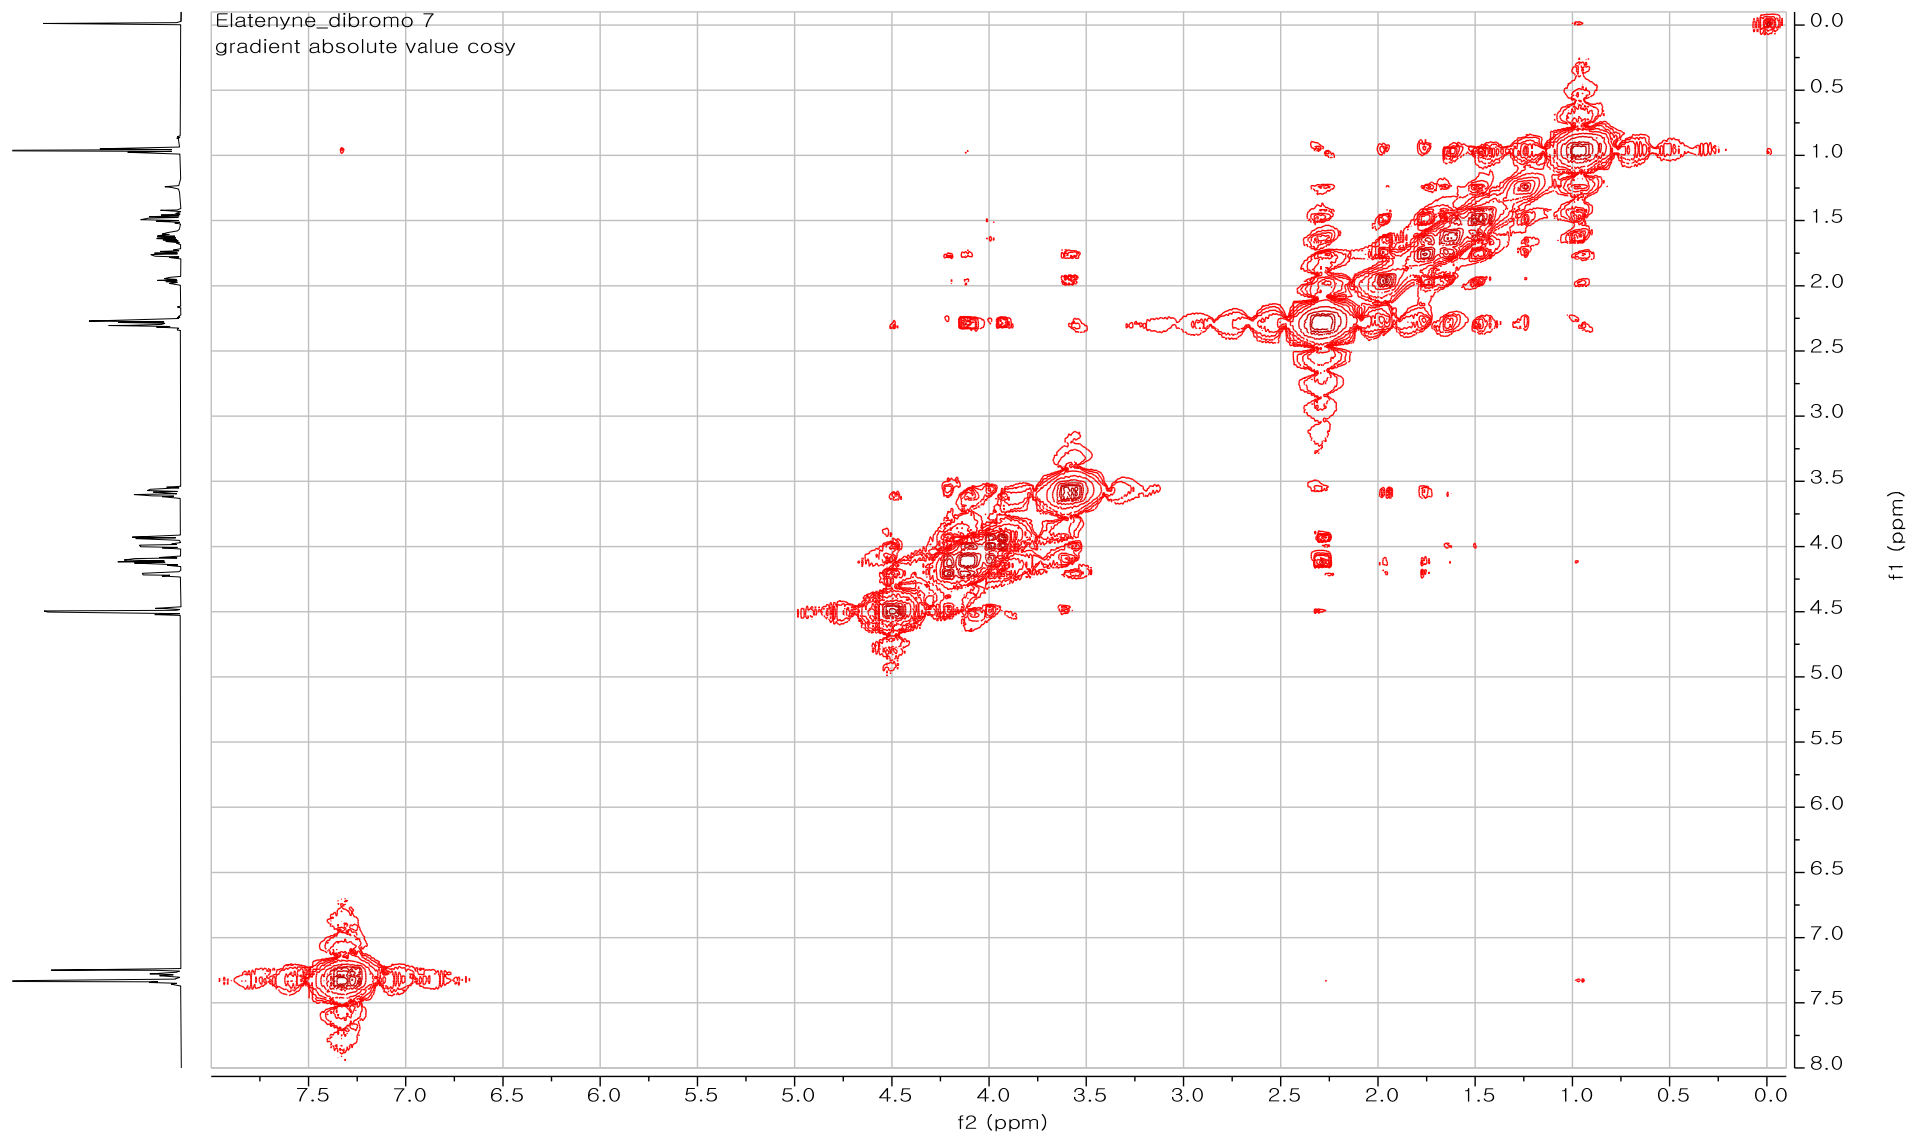

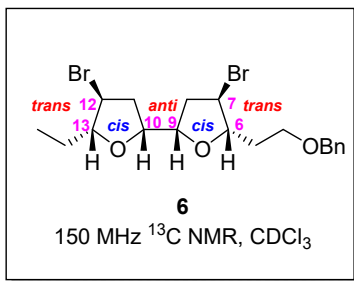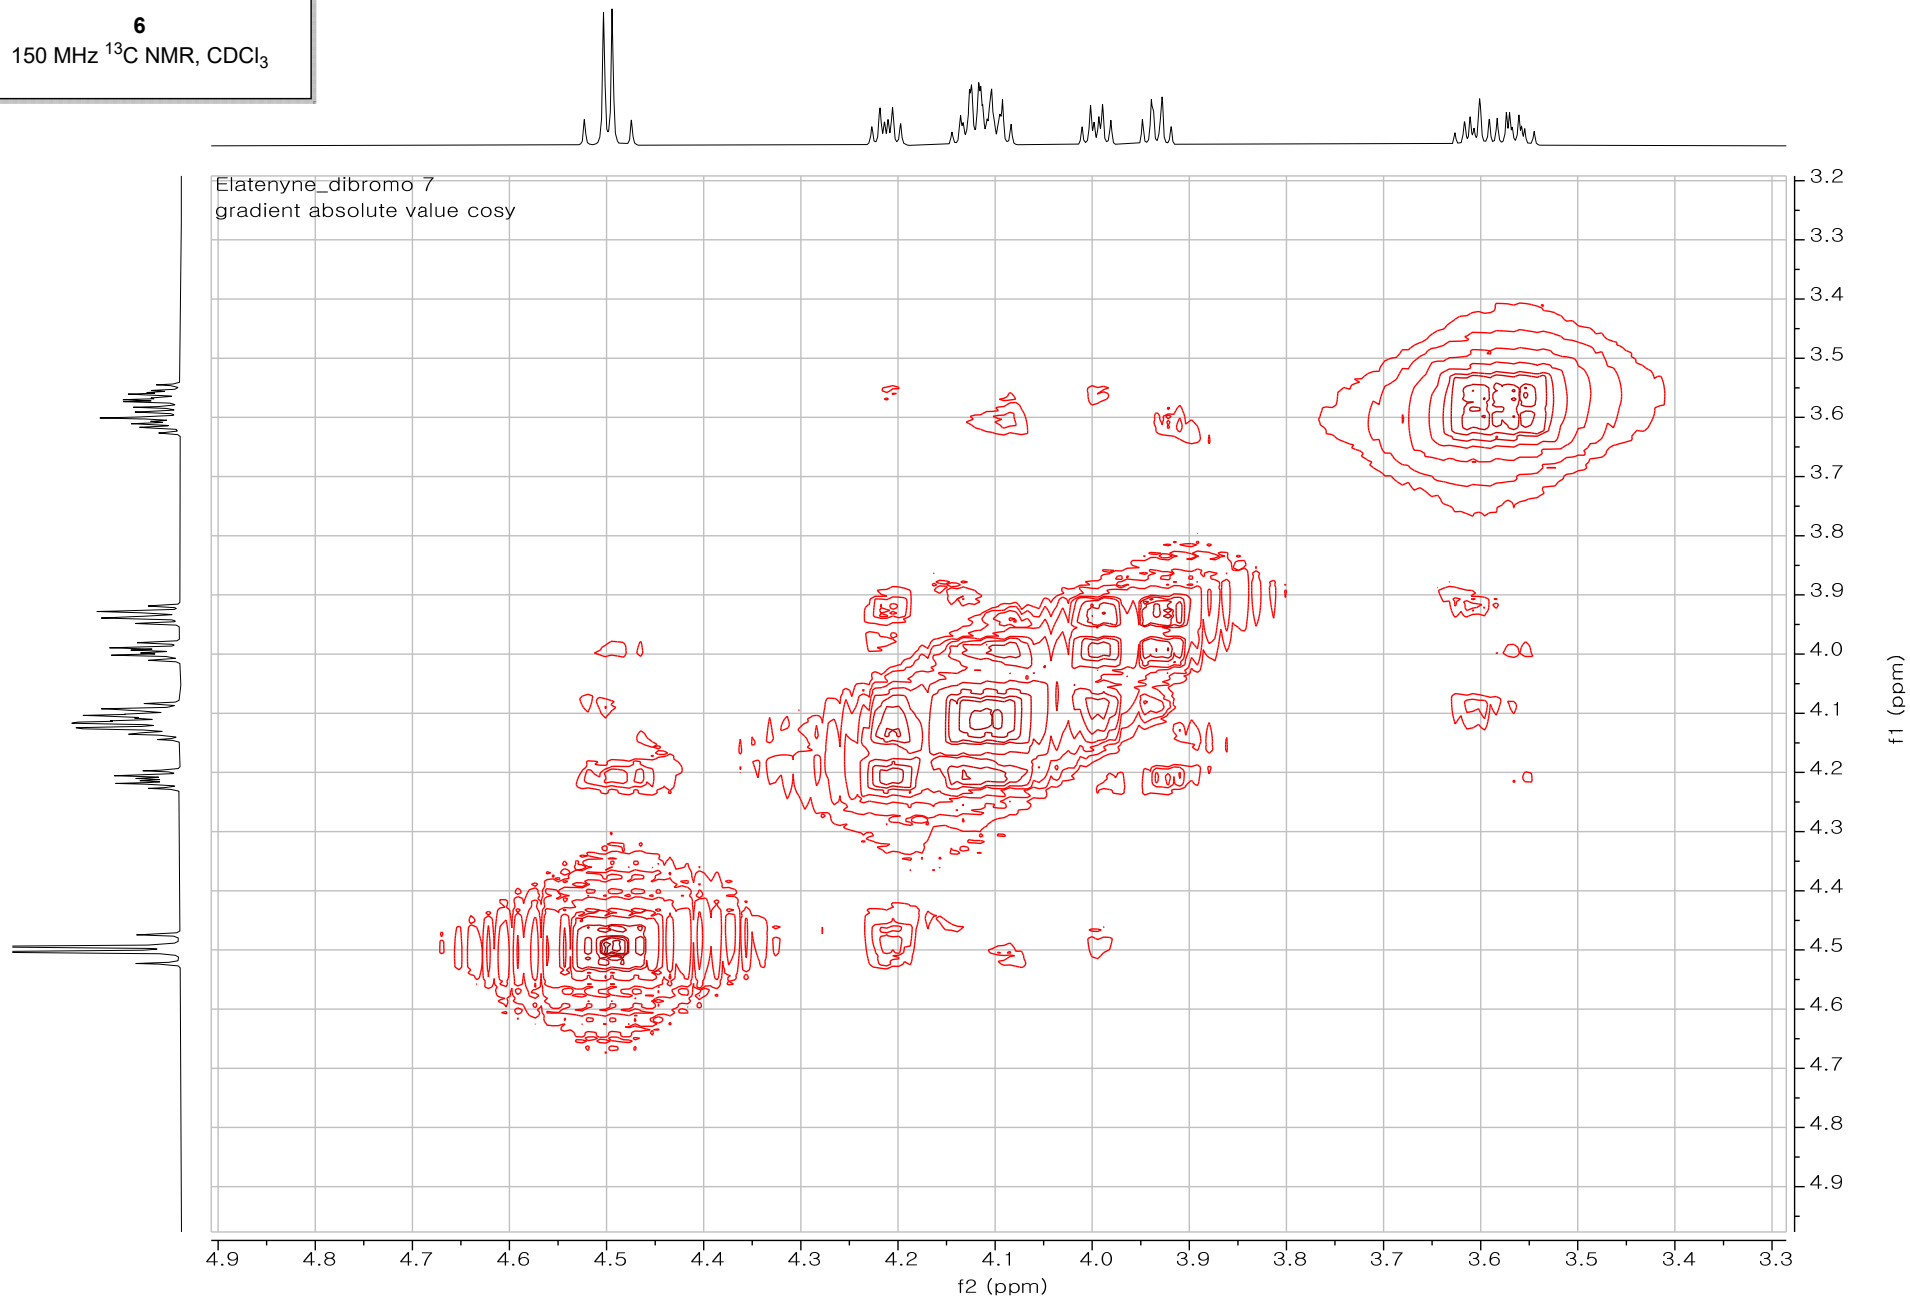

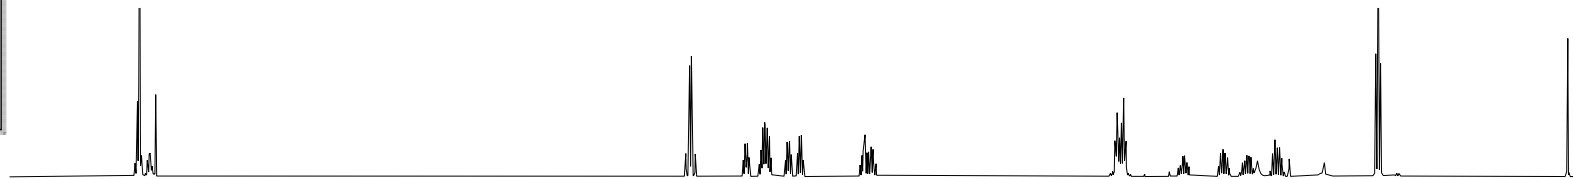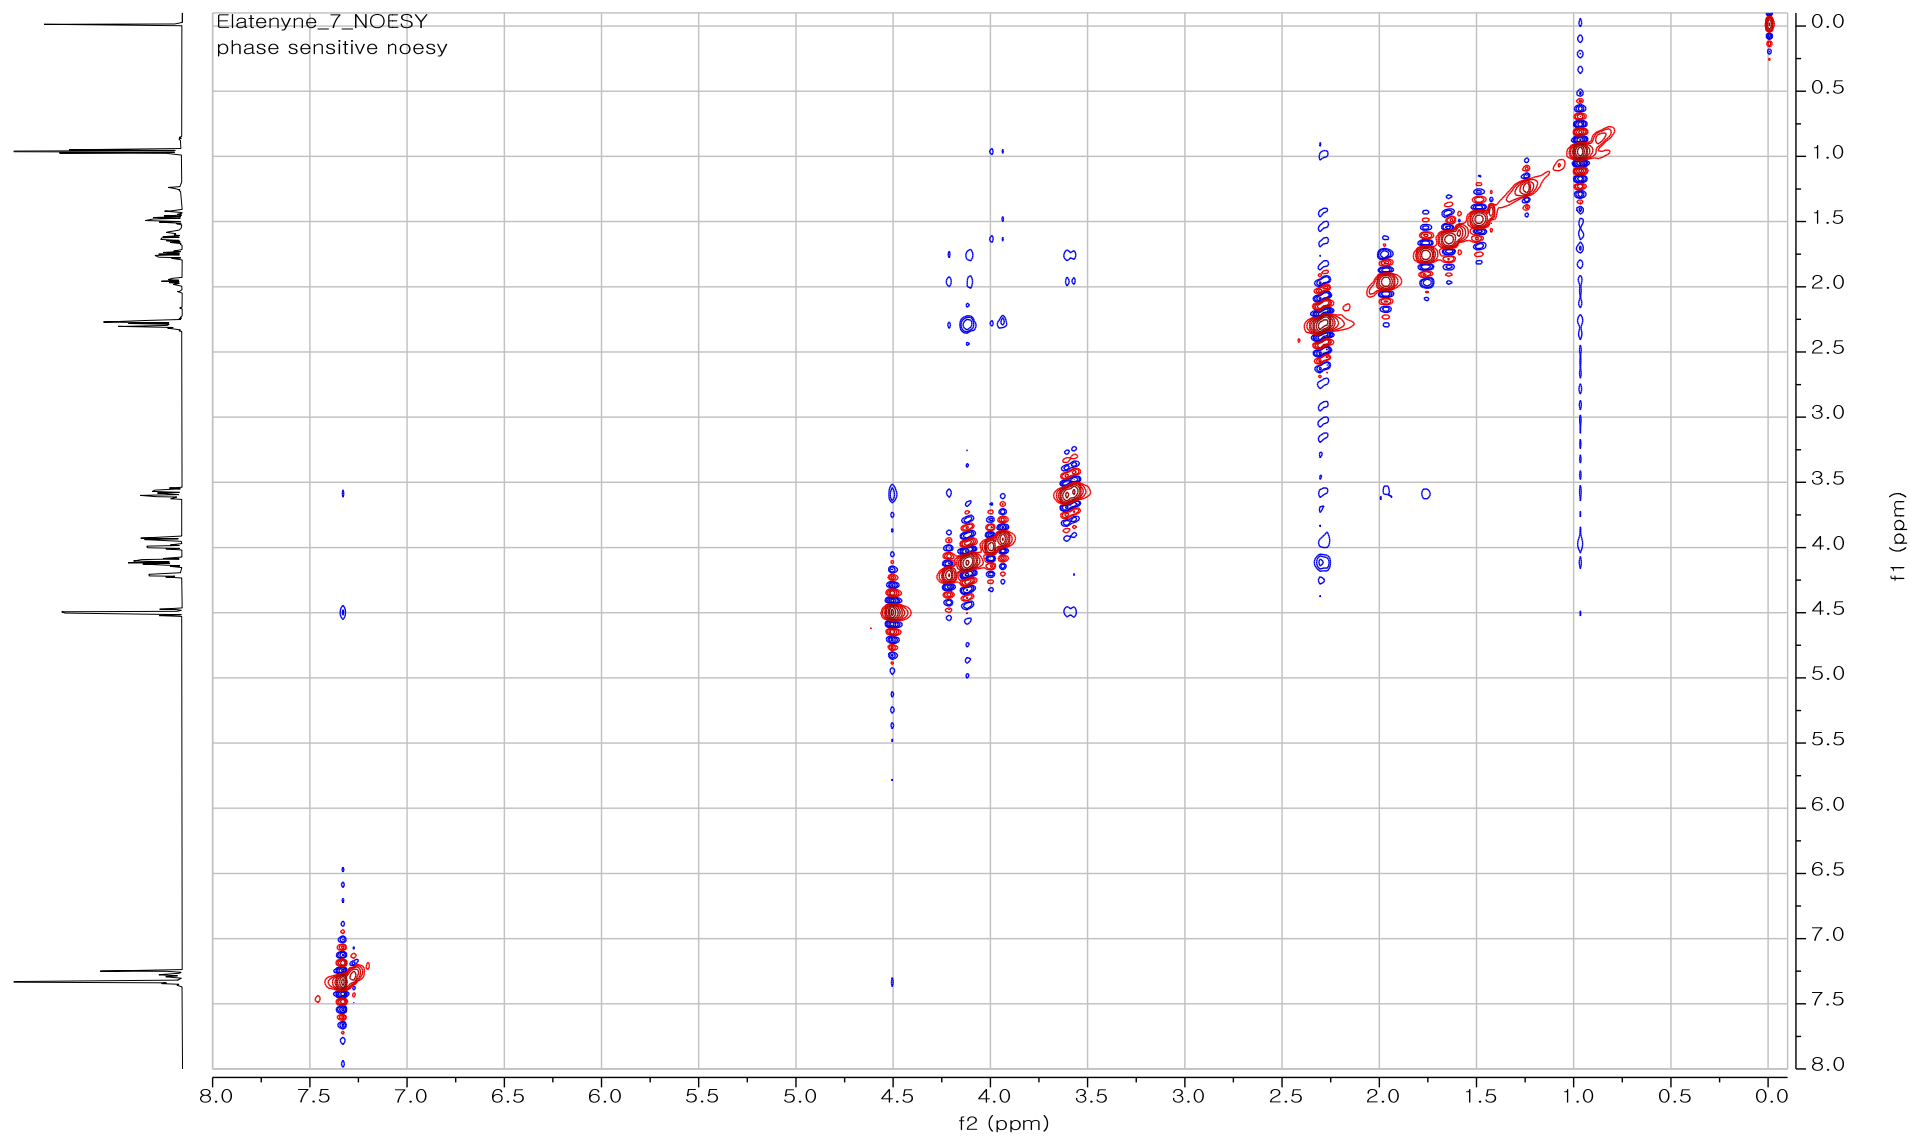

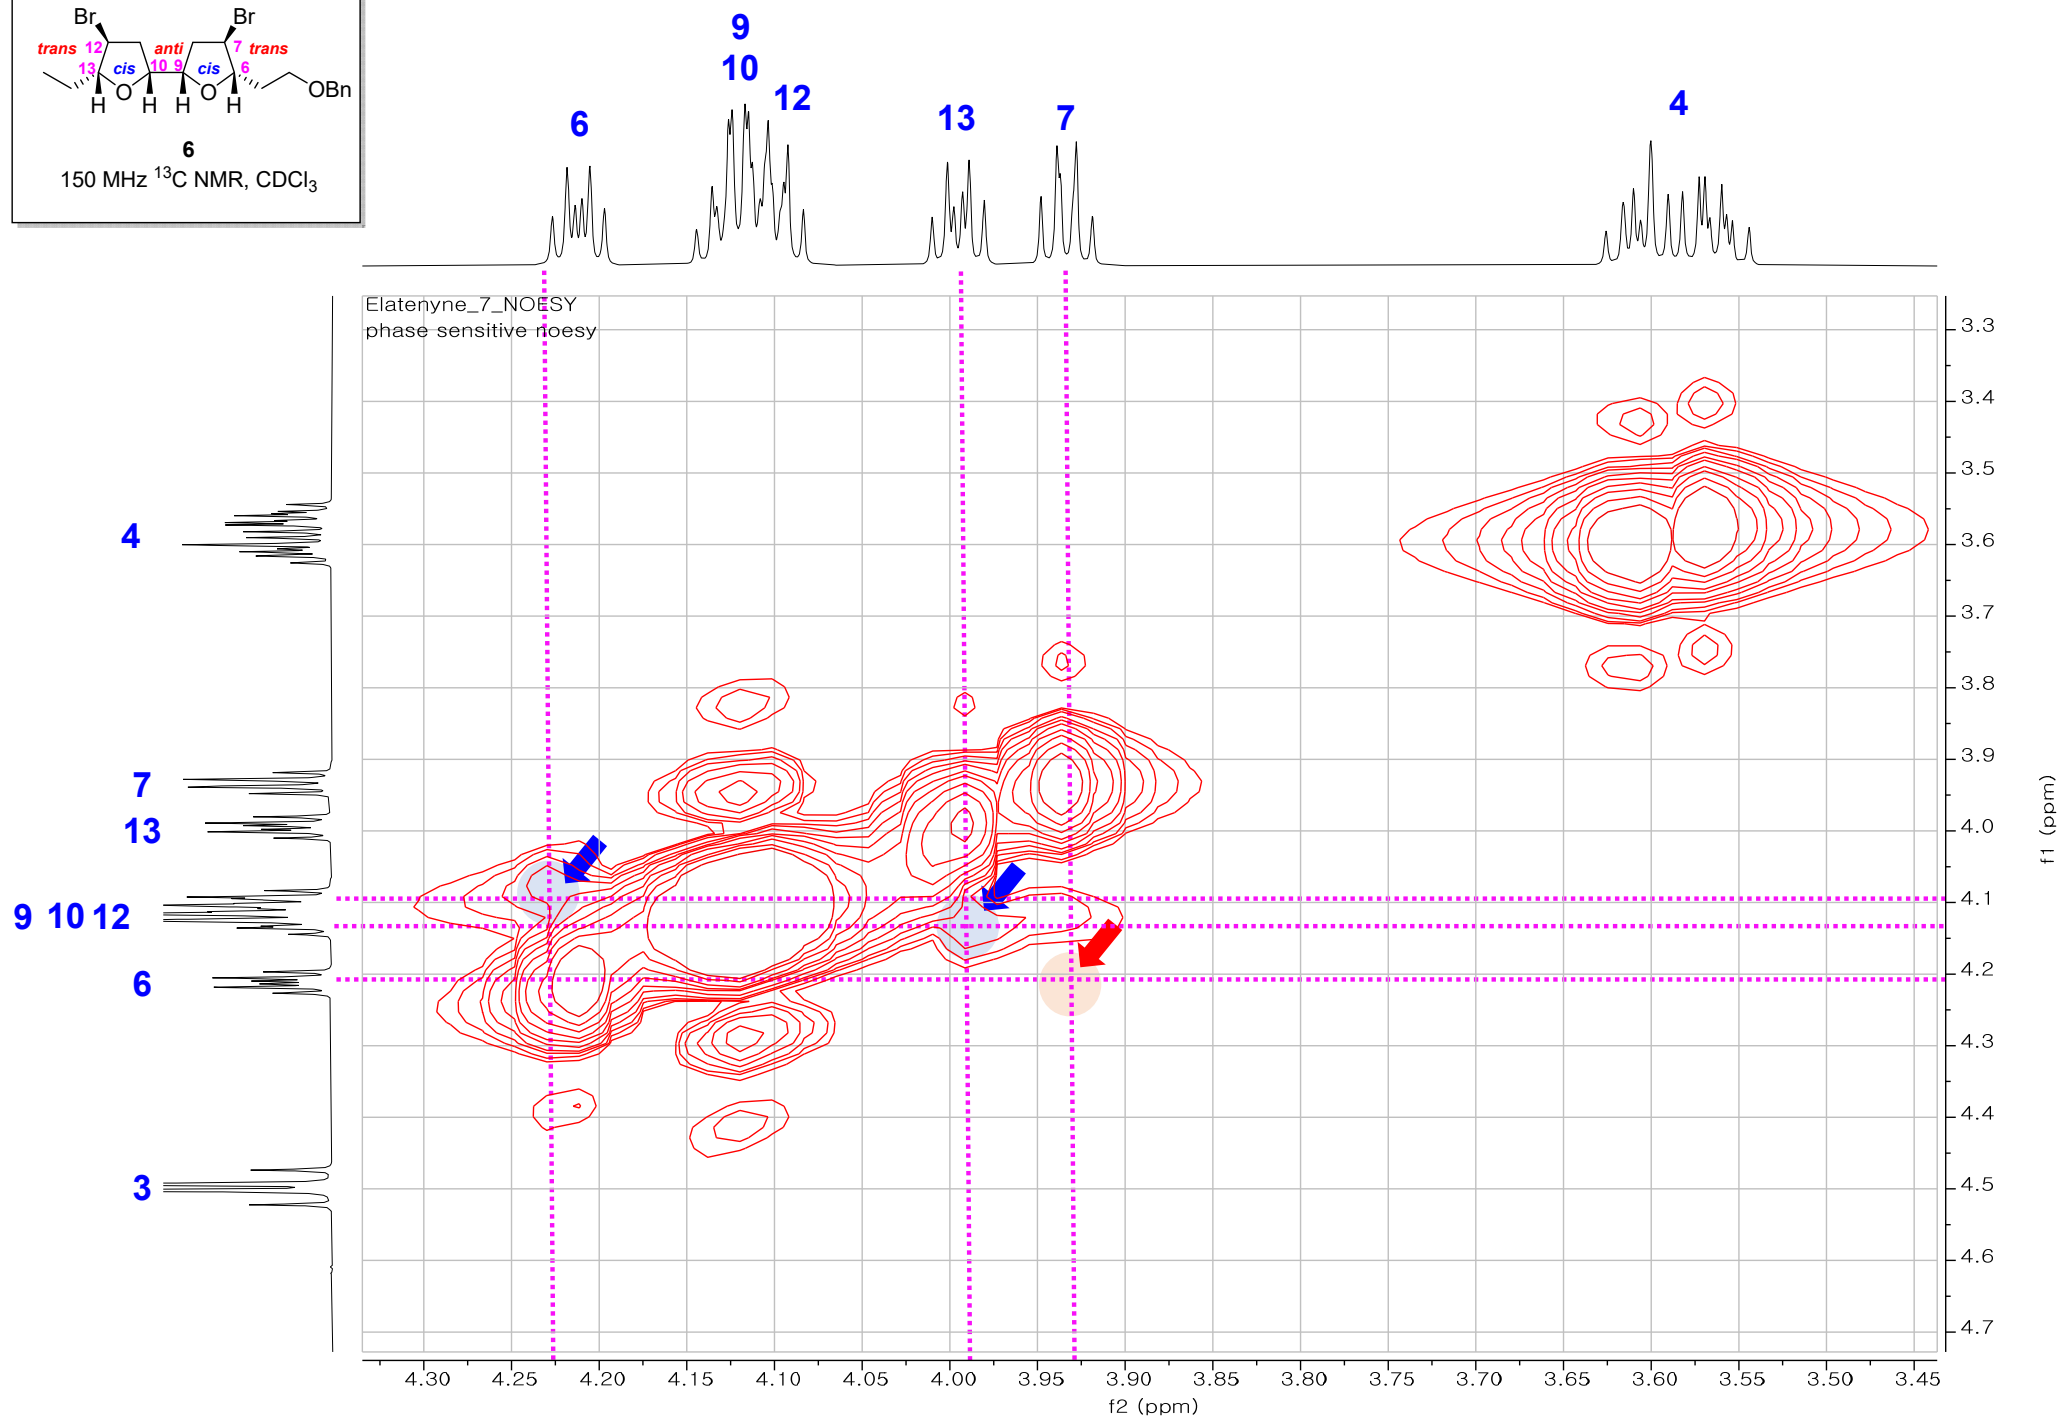

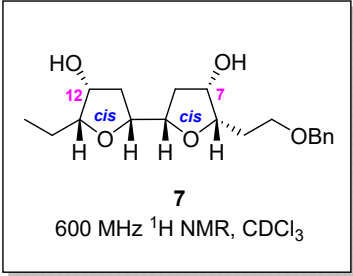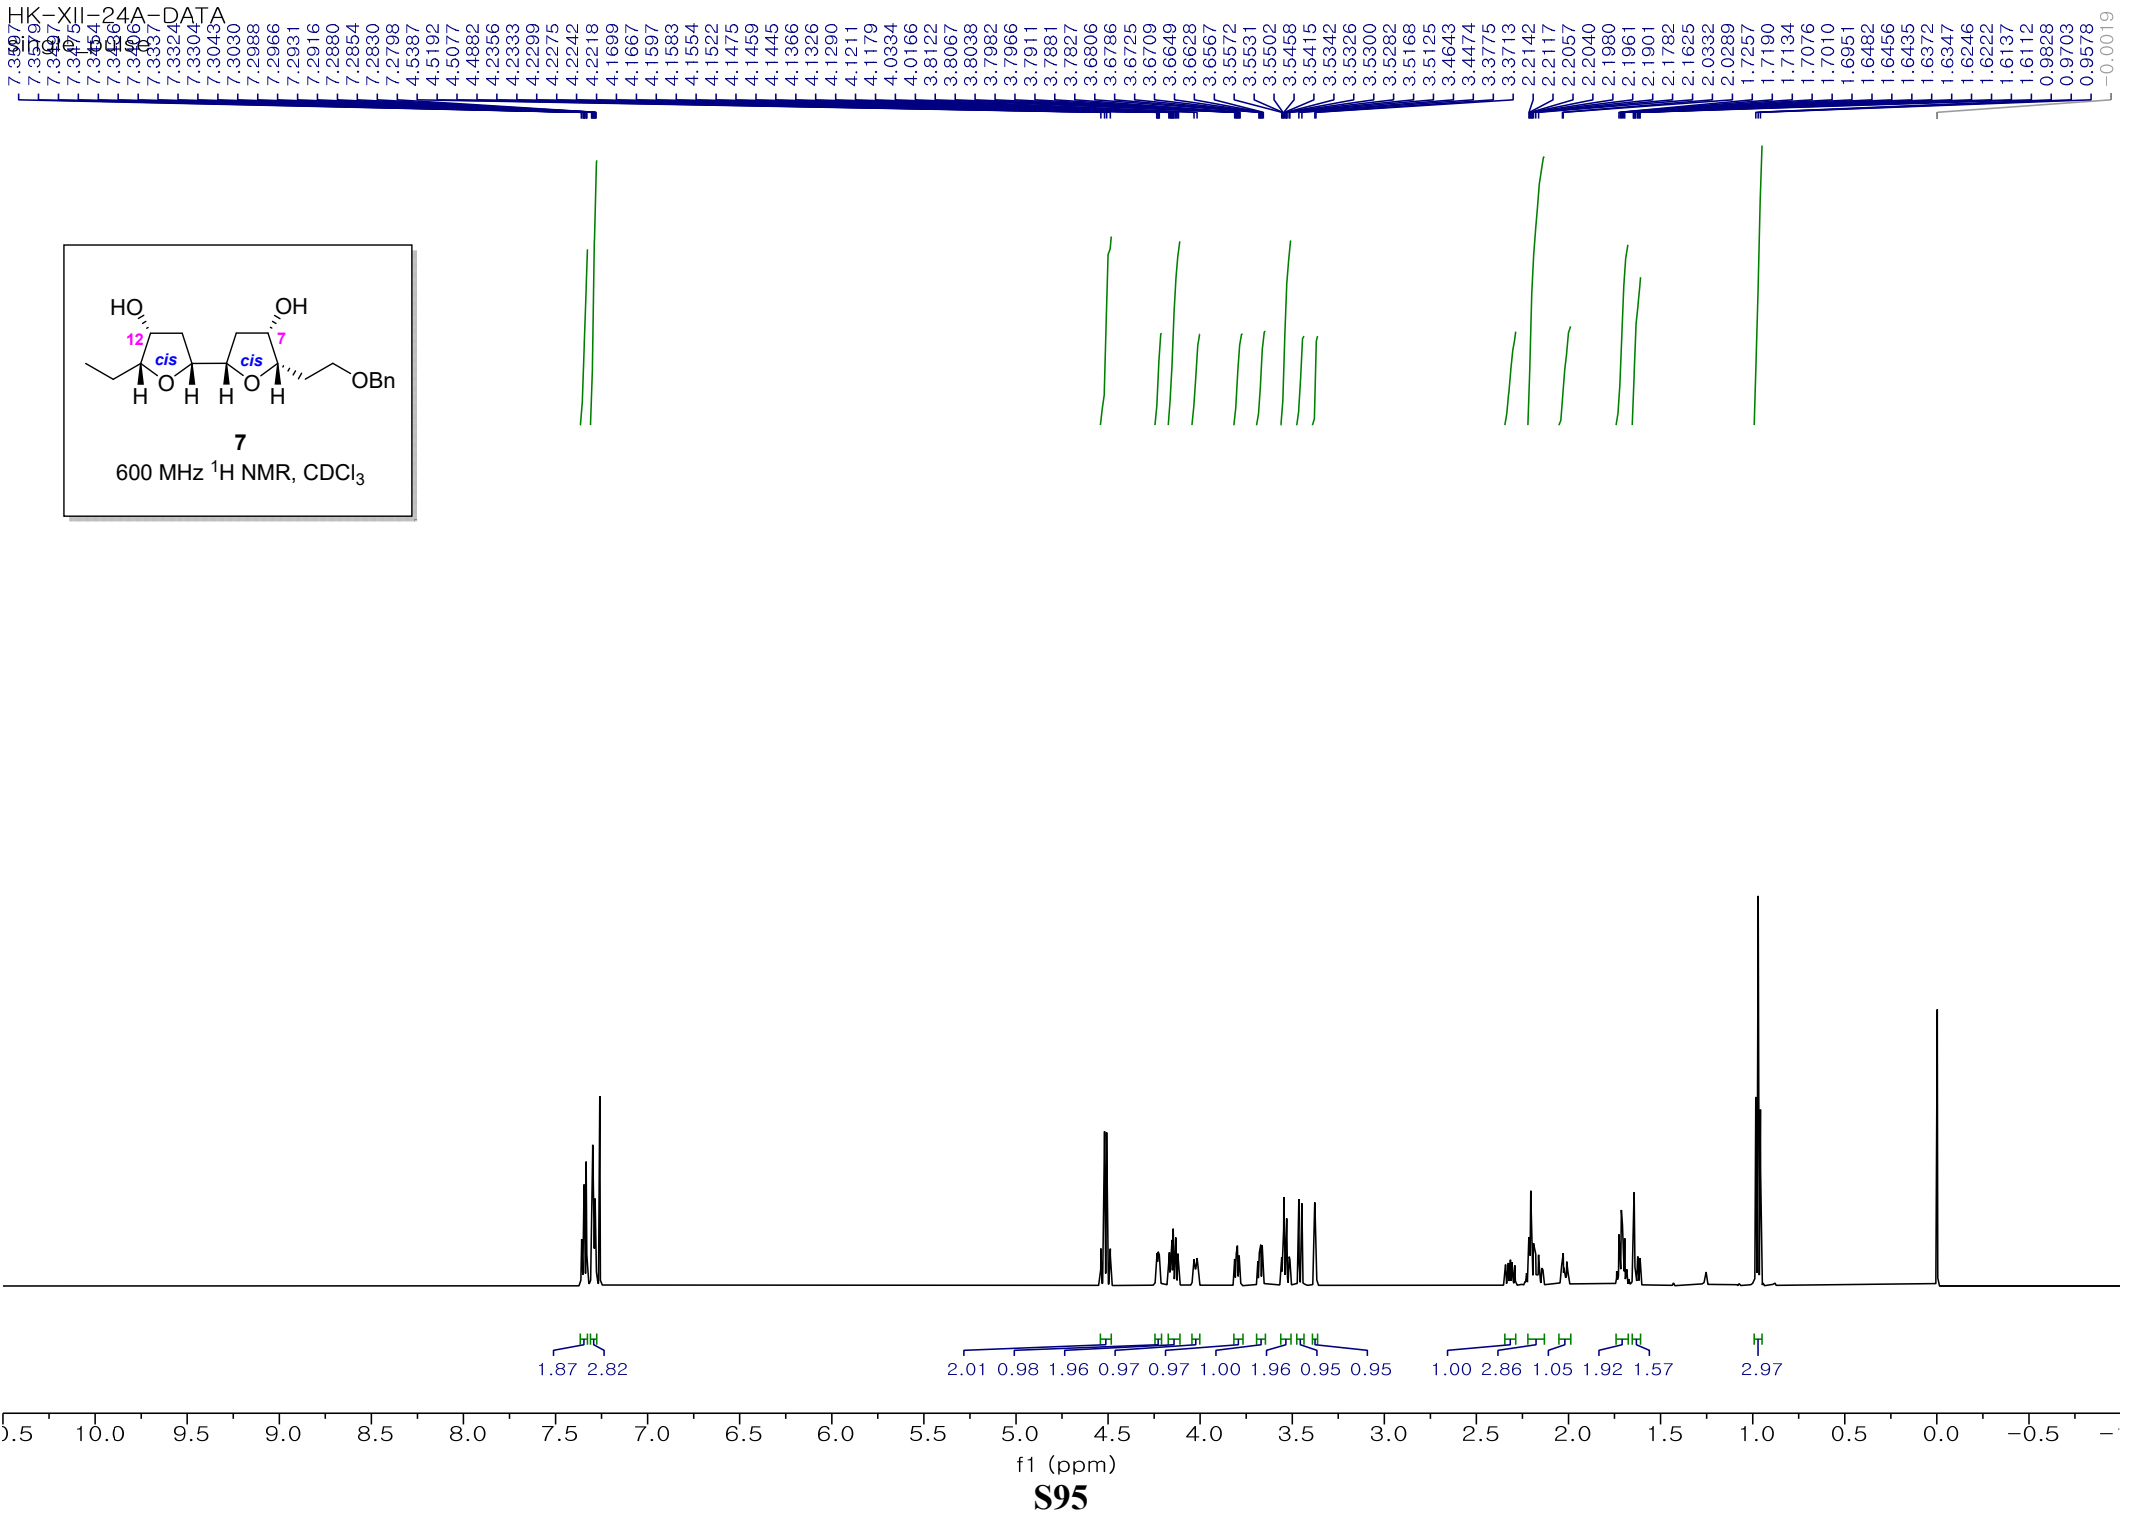

HK-XII-24A-DATA  
single pulse decoupled gated NOE

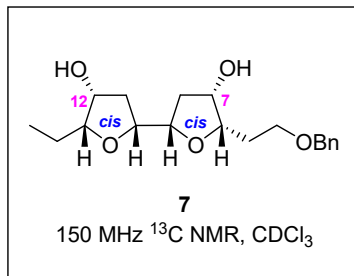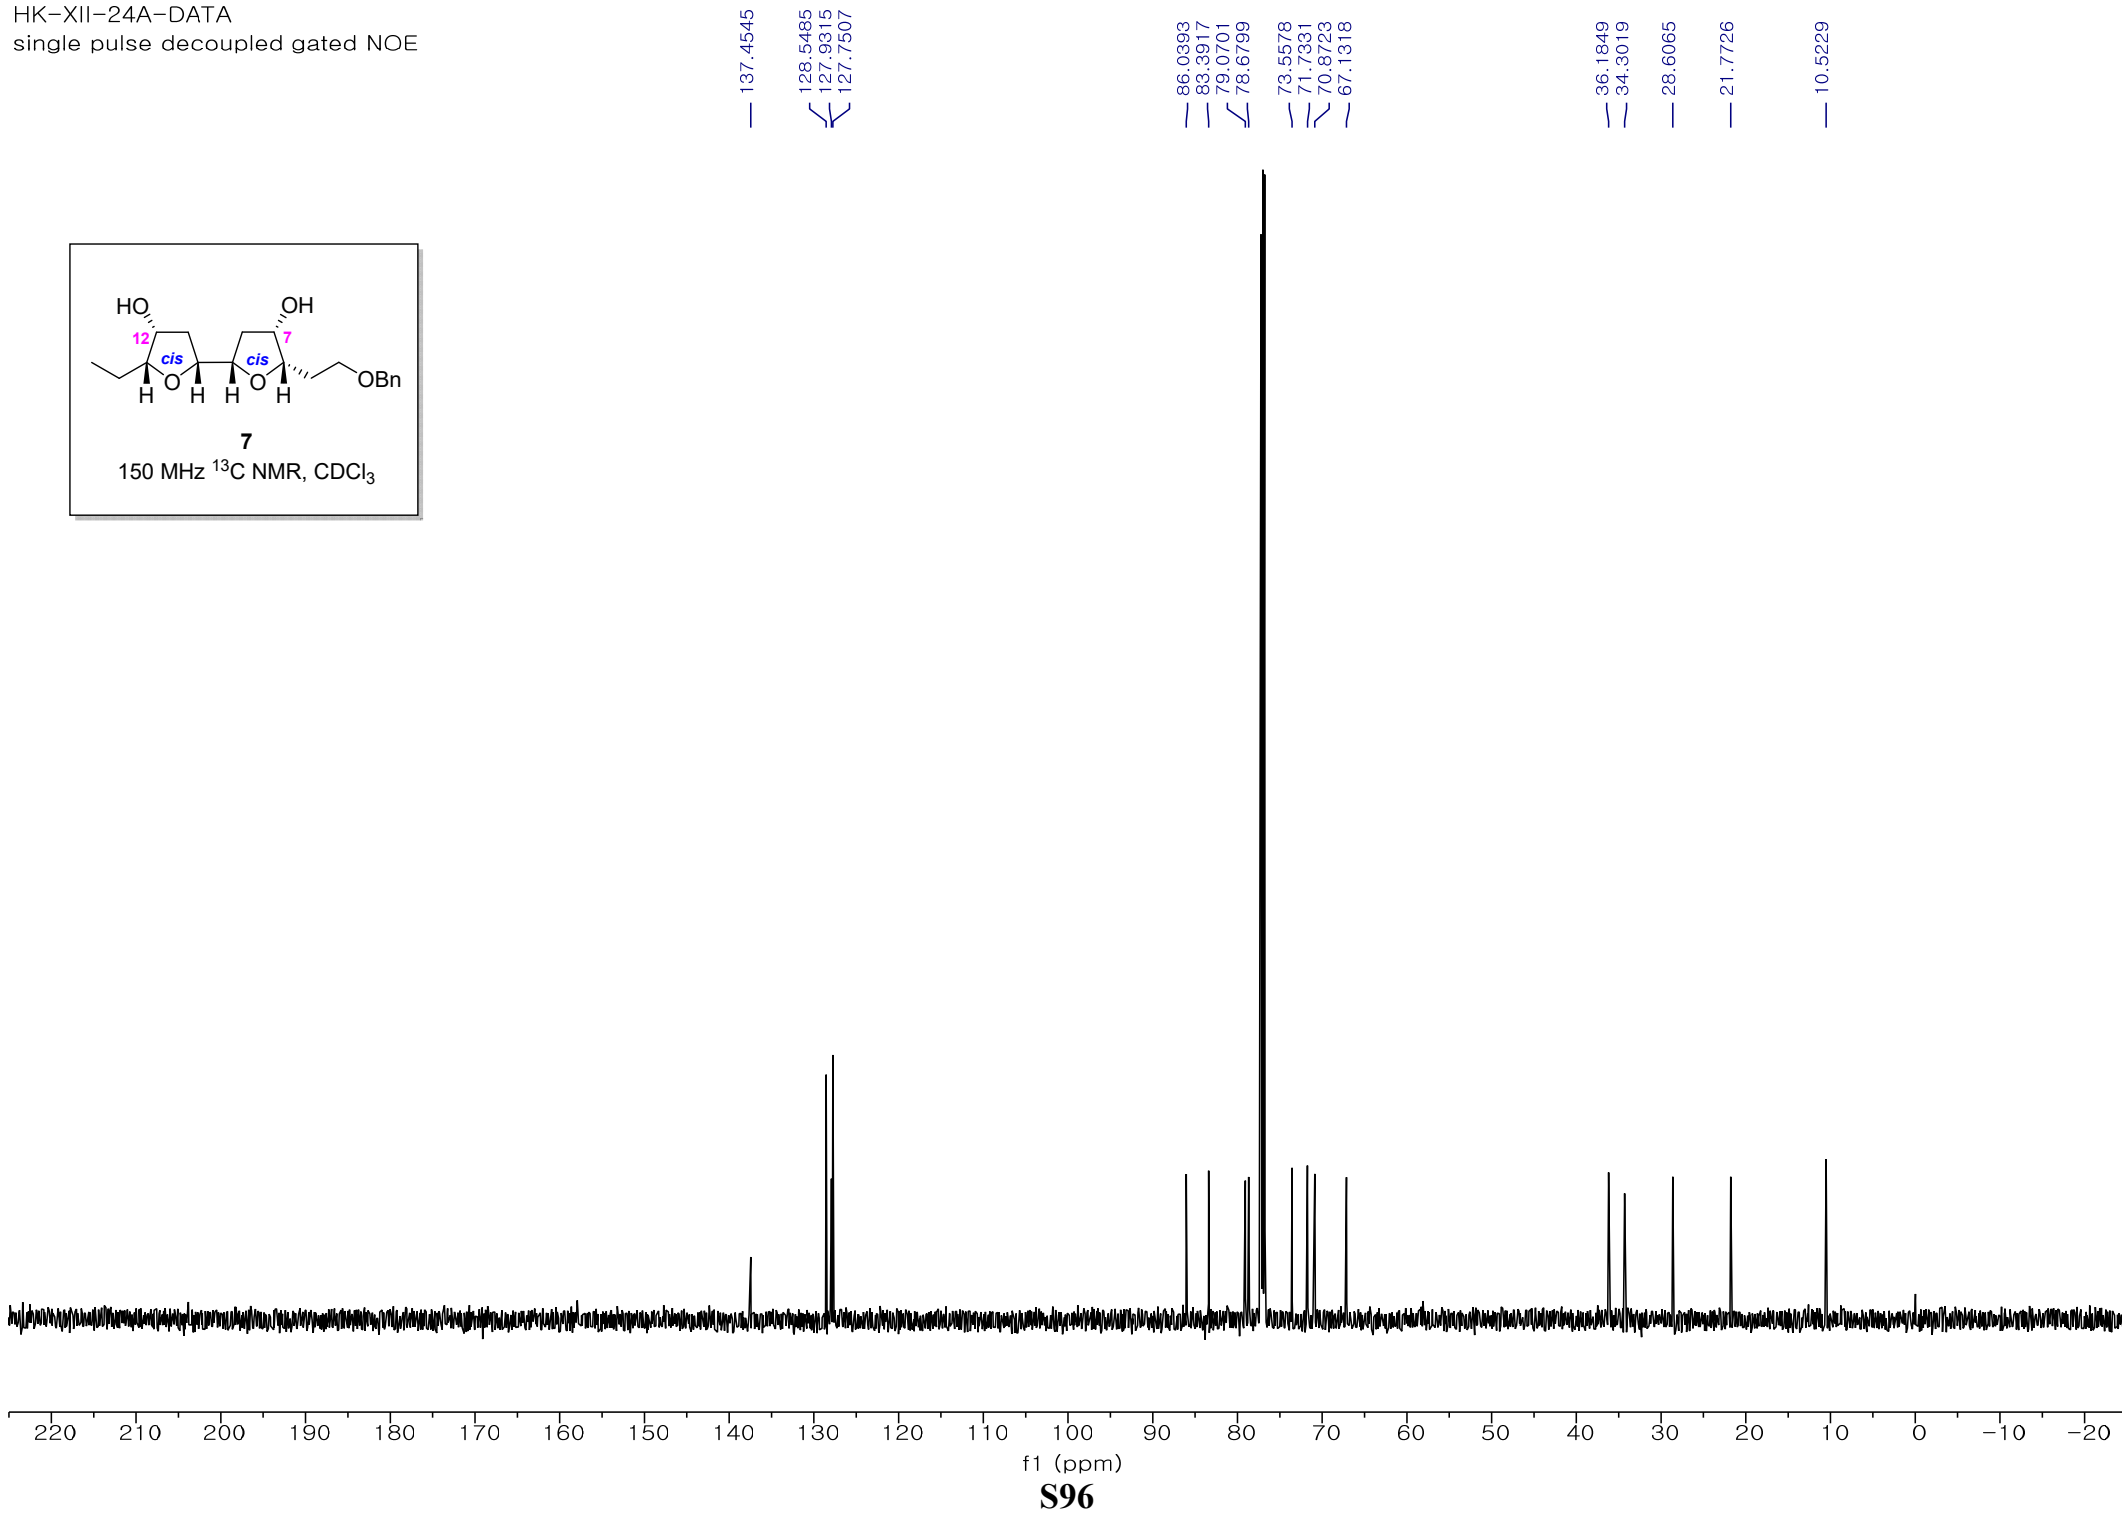



SK-2-21\_H  
single\_pulse

4.2088  
4.2028  
4.1981  
4.1947  
4.1922  
4.1878  
4.1837  
4.1776  
4.1721  
4.1681  
4.1639  
4.1609  
4.1526  
4.0361  
4.0274  
4.0238  
4.0187  
4.0151  
4.0083  
4.0063  
3.9979  
3.9957  
3.9853  
3.9596  
3.9513  
3.9473  
3.9427  
3.9388  
3.9303  
3.8136  
3.8099  
3.8060  
3.7992  
3.7944  
3.7913  
3.7886  
3.7808  
2.4136  
2.4028  
2.4009  
2.3905  
2.3802  
2.3781  
2.3676  
2.3300  
2.3244  
2.3198  
2.3185  
2.3135  
2.3082  
2.3013  
2.2972  
2.2955  
2.2934  
2.2906  
2.2865  
2.2826  
2.2774  
2.2650  
2.2527  
2.2425  
2.2353  
2.2327  
2.2298  
2.2246  
2.0260  
2.0247  
2.0224  
2.0162  
2.0084  
2.0017  
1.9990  
1.9948  
1.9917  
1.7593  
1.7513  
1.7475  
1.7449  
1.7395  
1.7368  
1.7355  
1.7332  
1.7268  
1.7249  
1.7210  
1.7126  
1.6820  
1.6736  
1.6696  
1.6611  
1.6589  
1.6504  
1.6464  
1.6380  
1.5796  
1.5227  
1.5103  
1.4982  
1.4871  
1.4748  
0.9939  
0.9893  
0.9815  
0.9690  
0.0027  
-0.0028

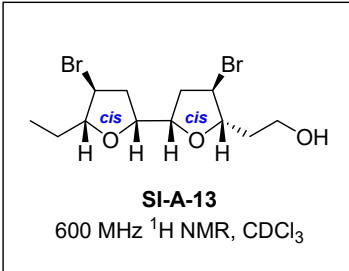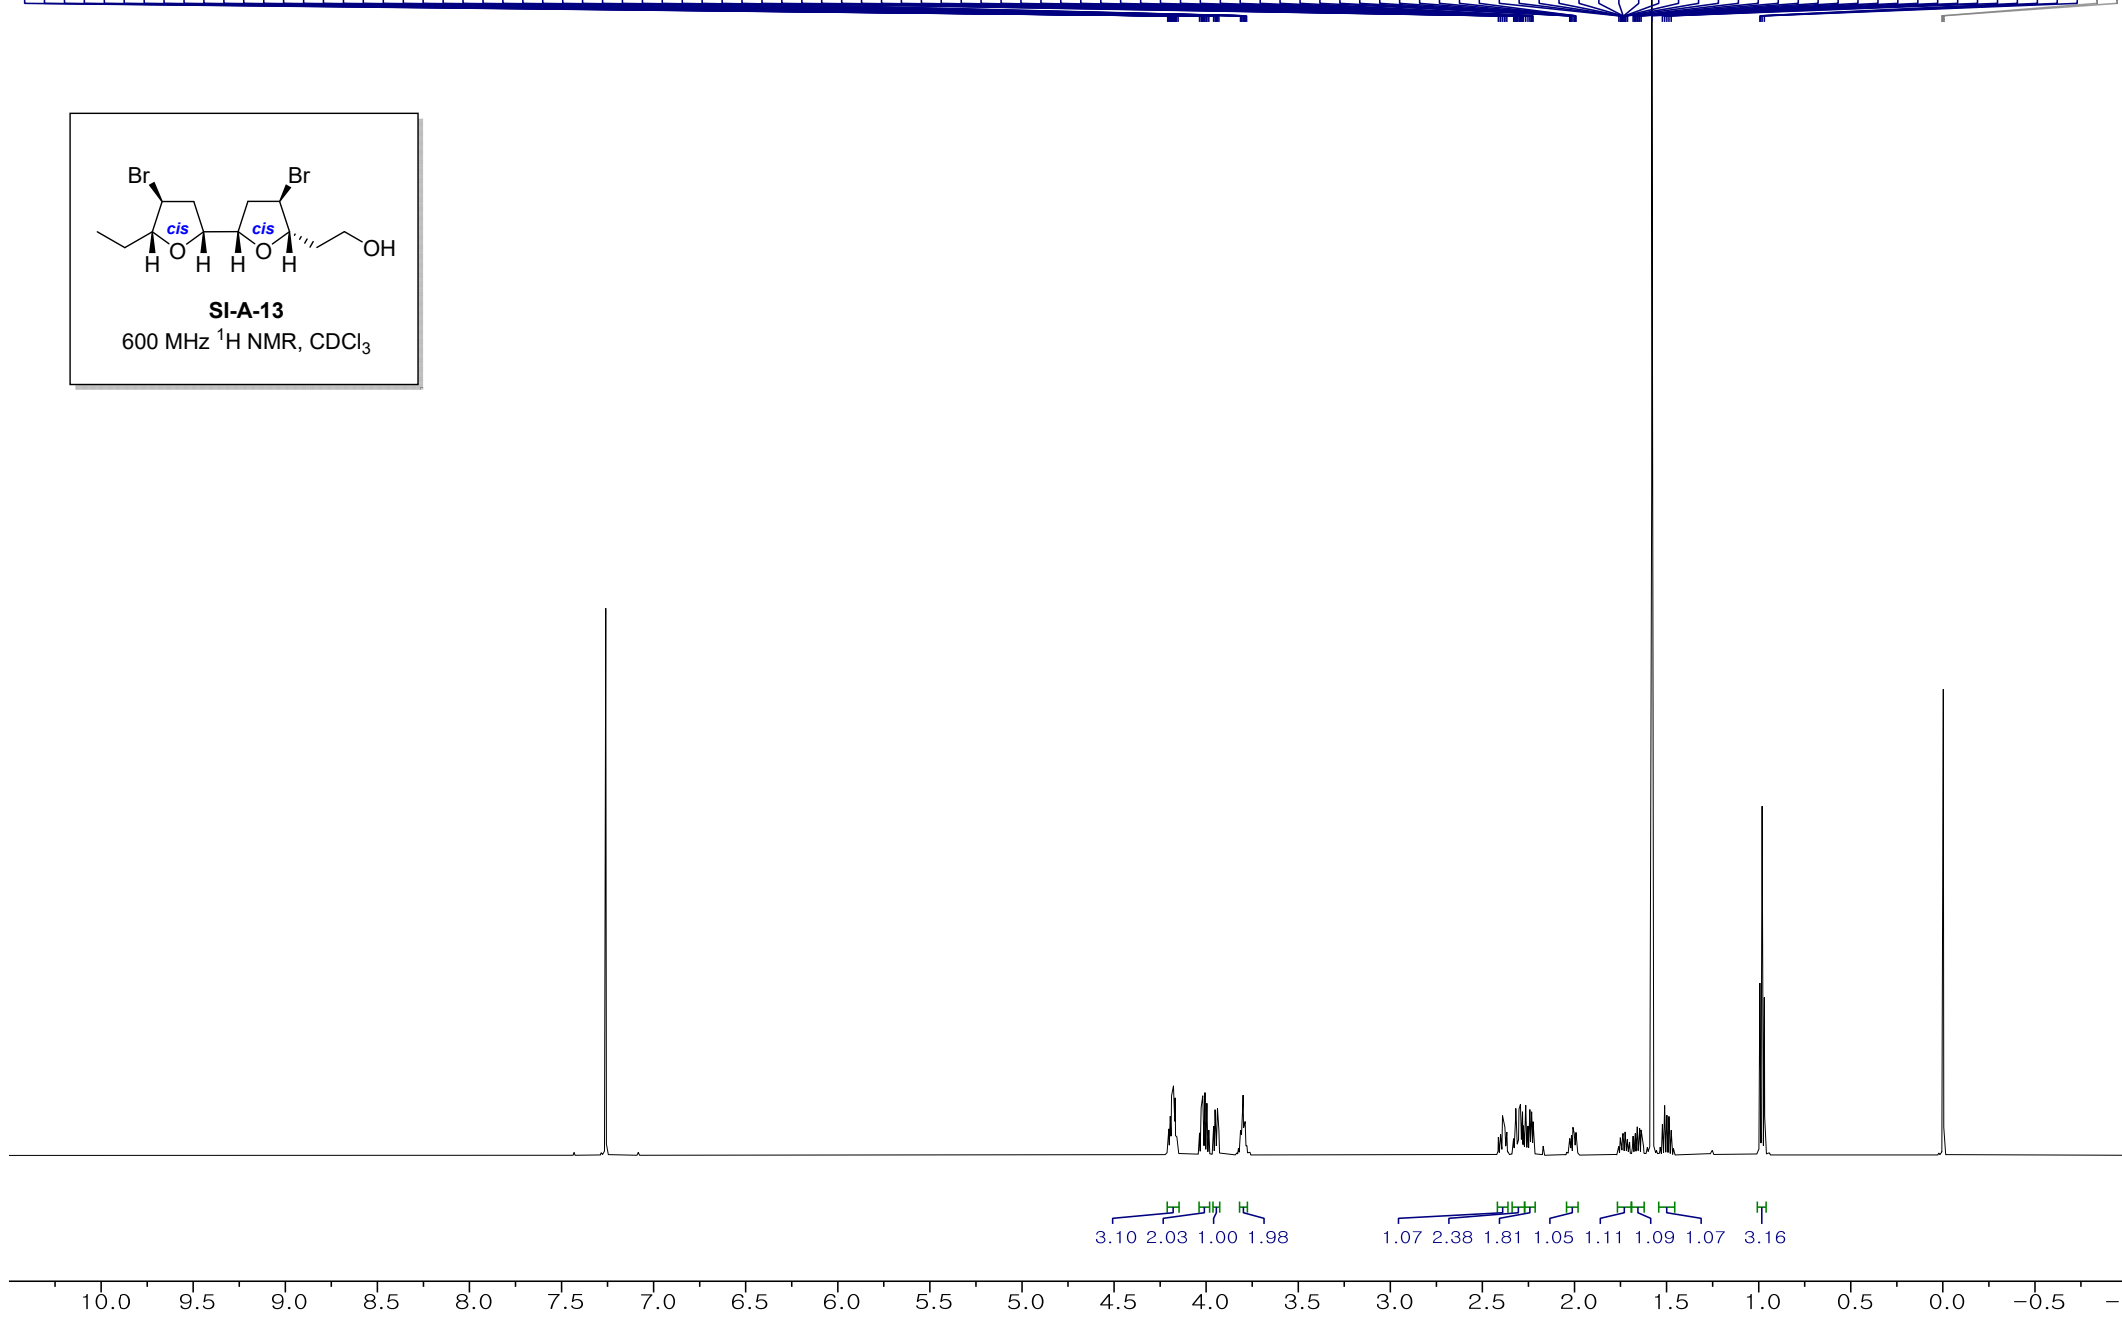

f1 (ppm)  
**S97**

SK-2-21\_C  
single pulse decoupled gated NOE

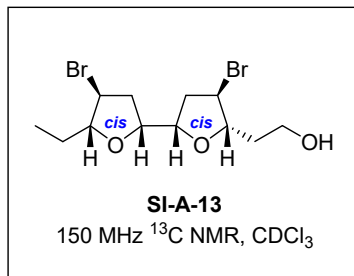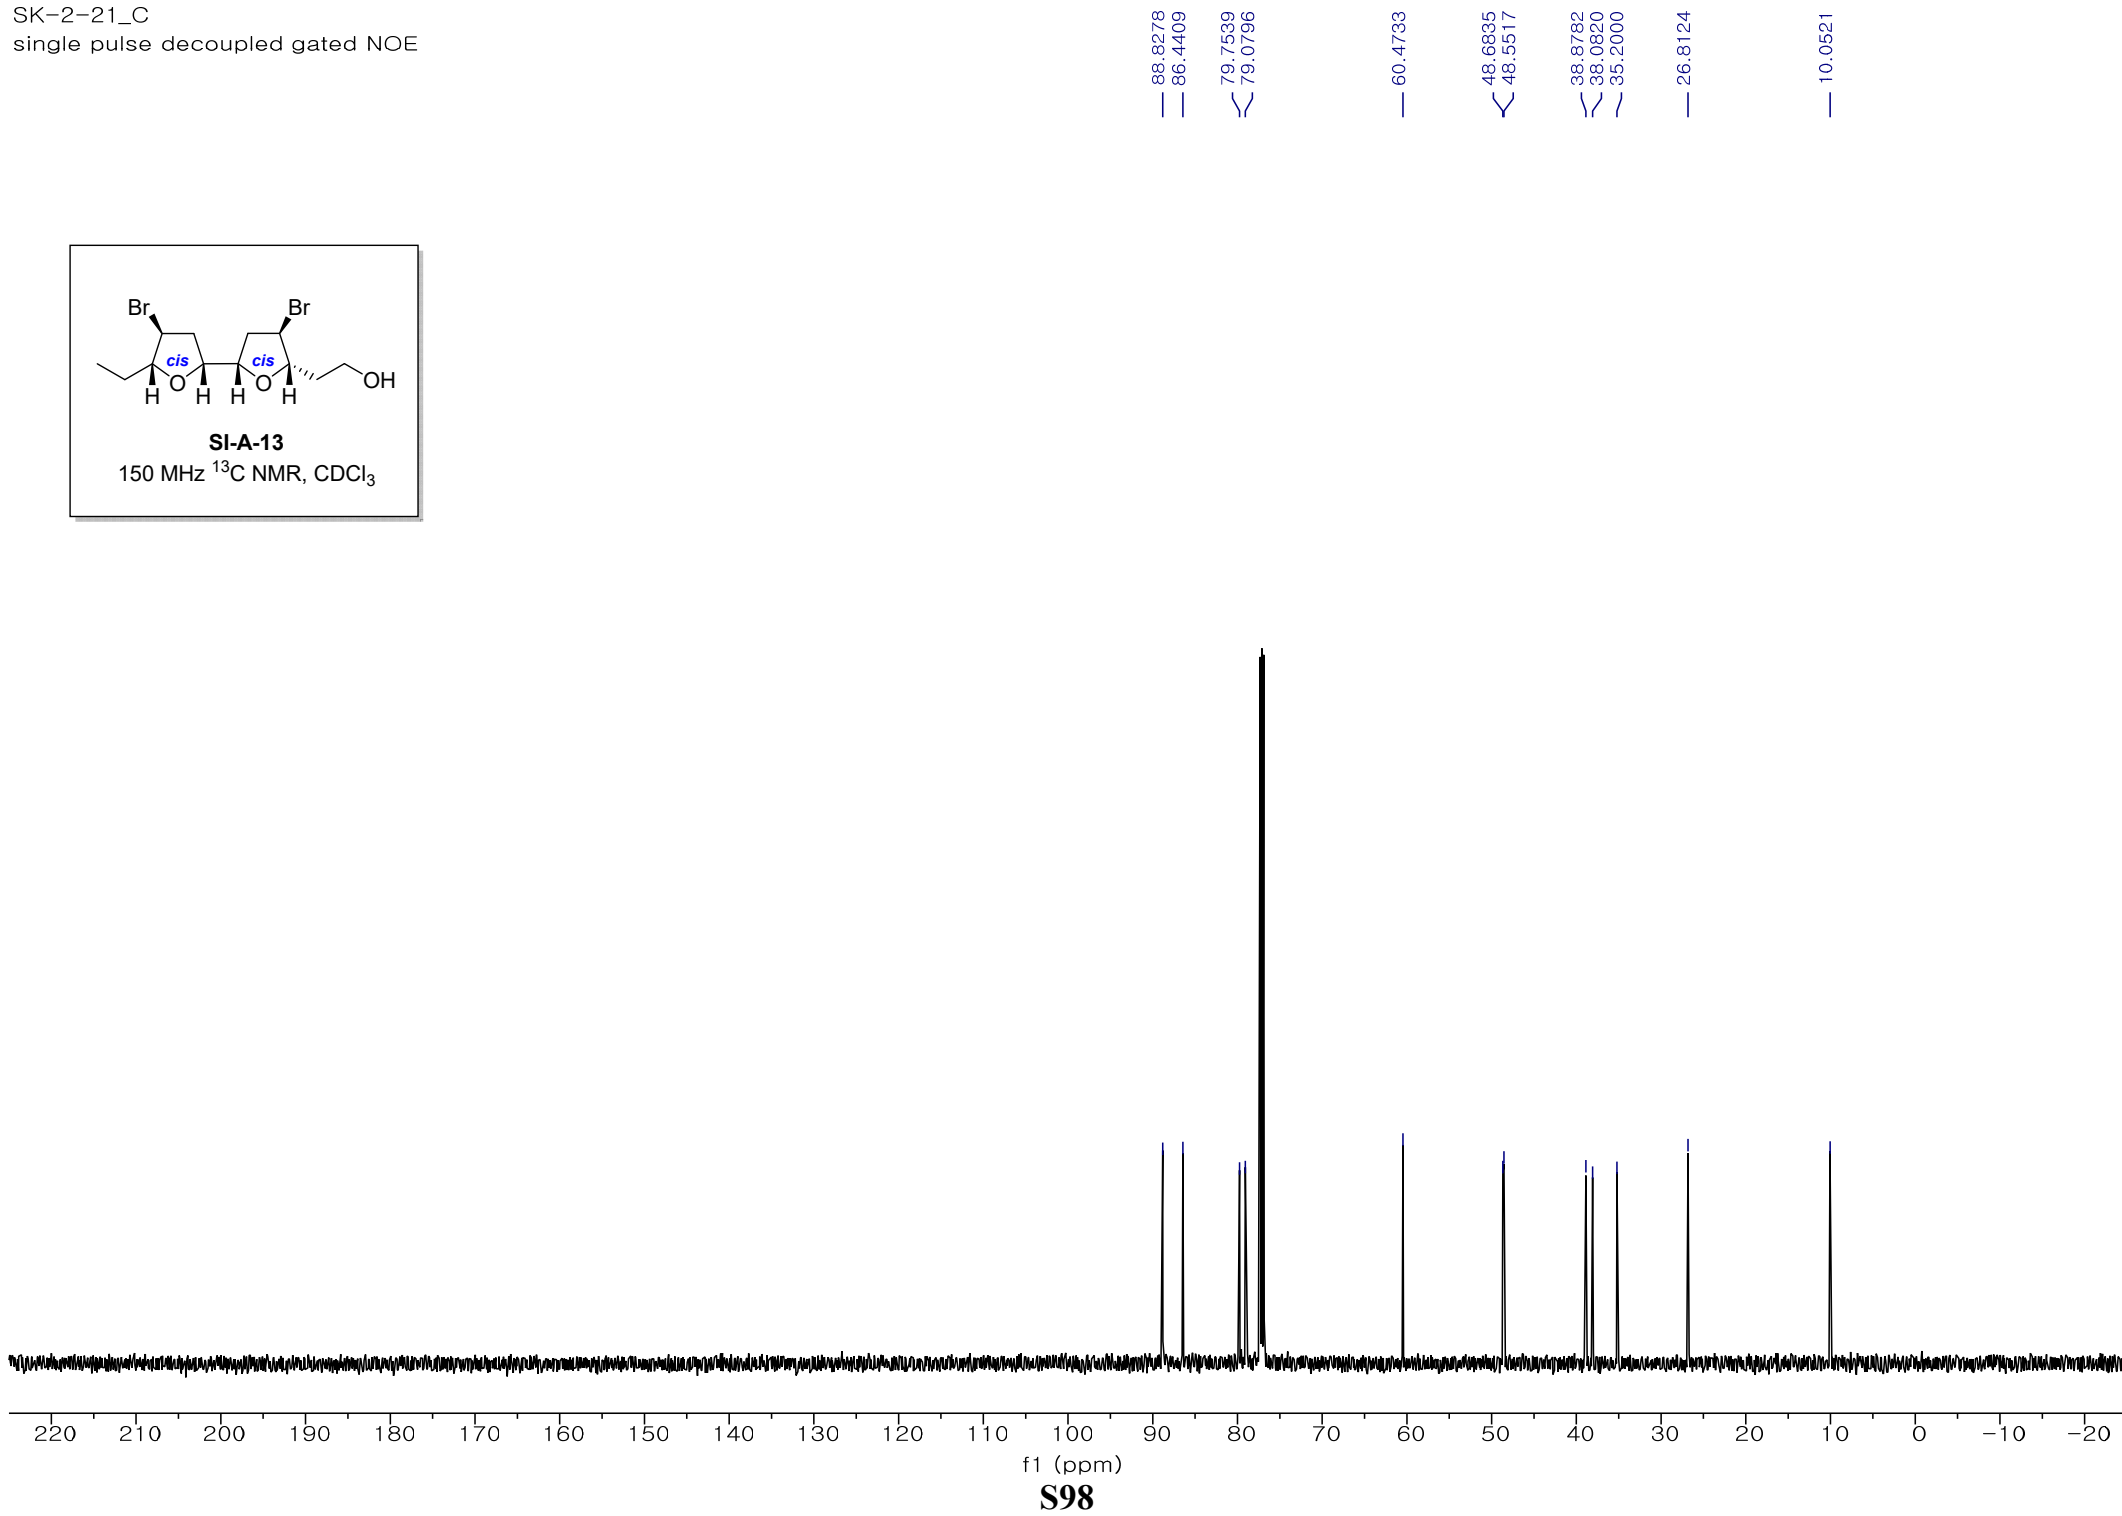

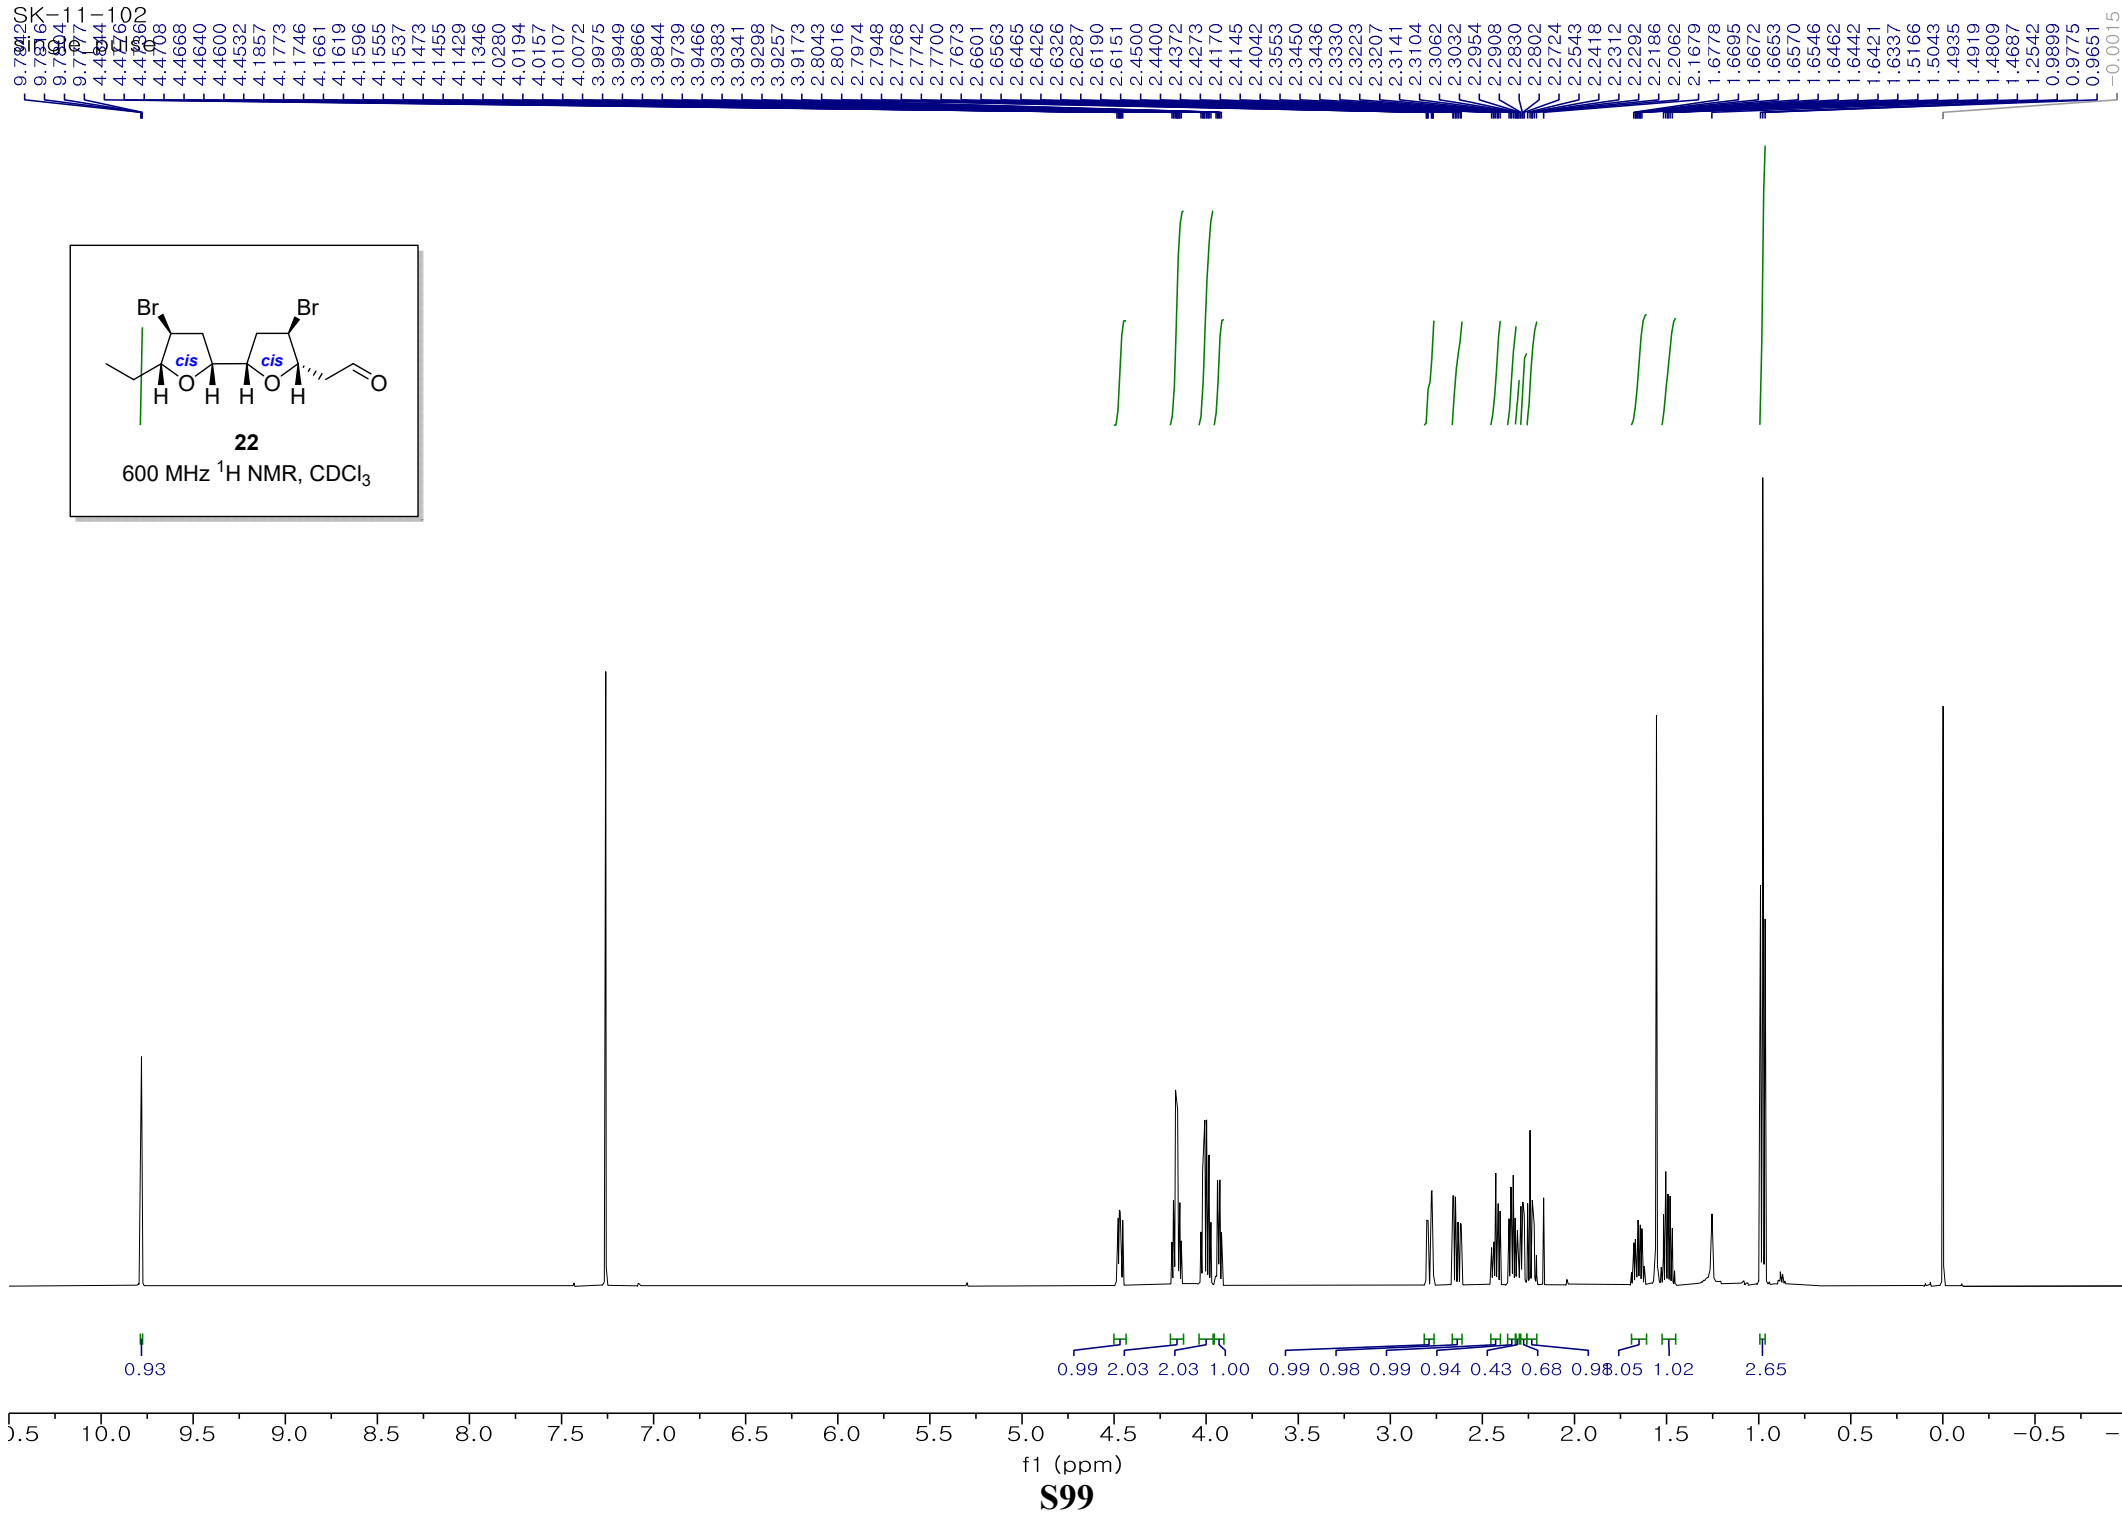

SK-11-102  
single pulse decoupled gated NOE

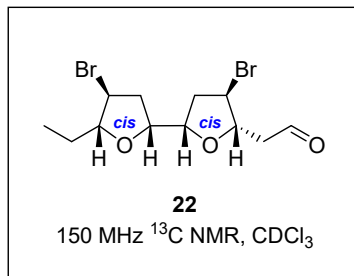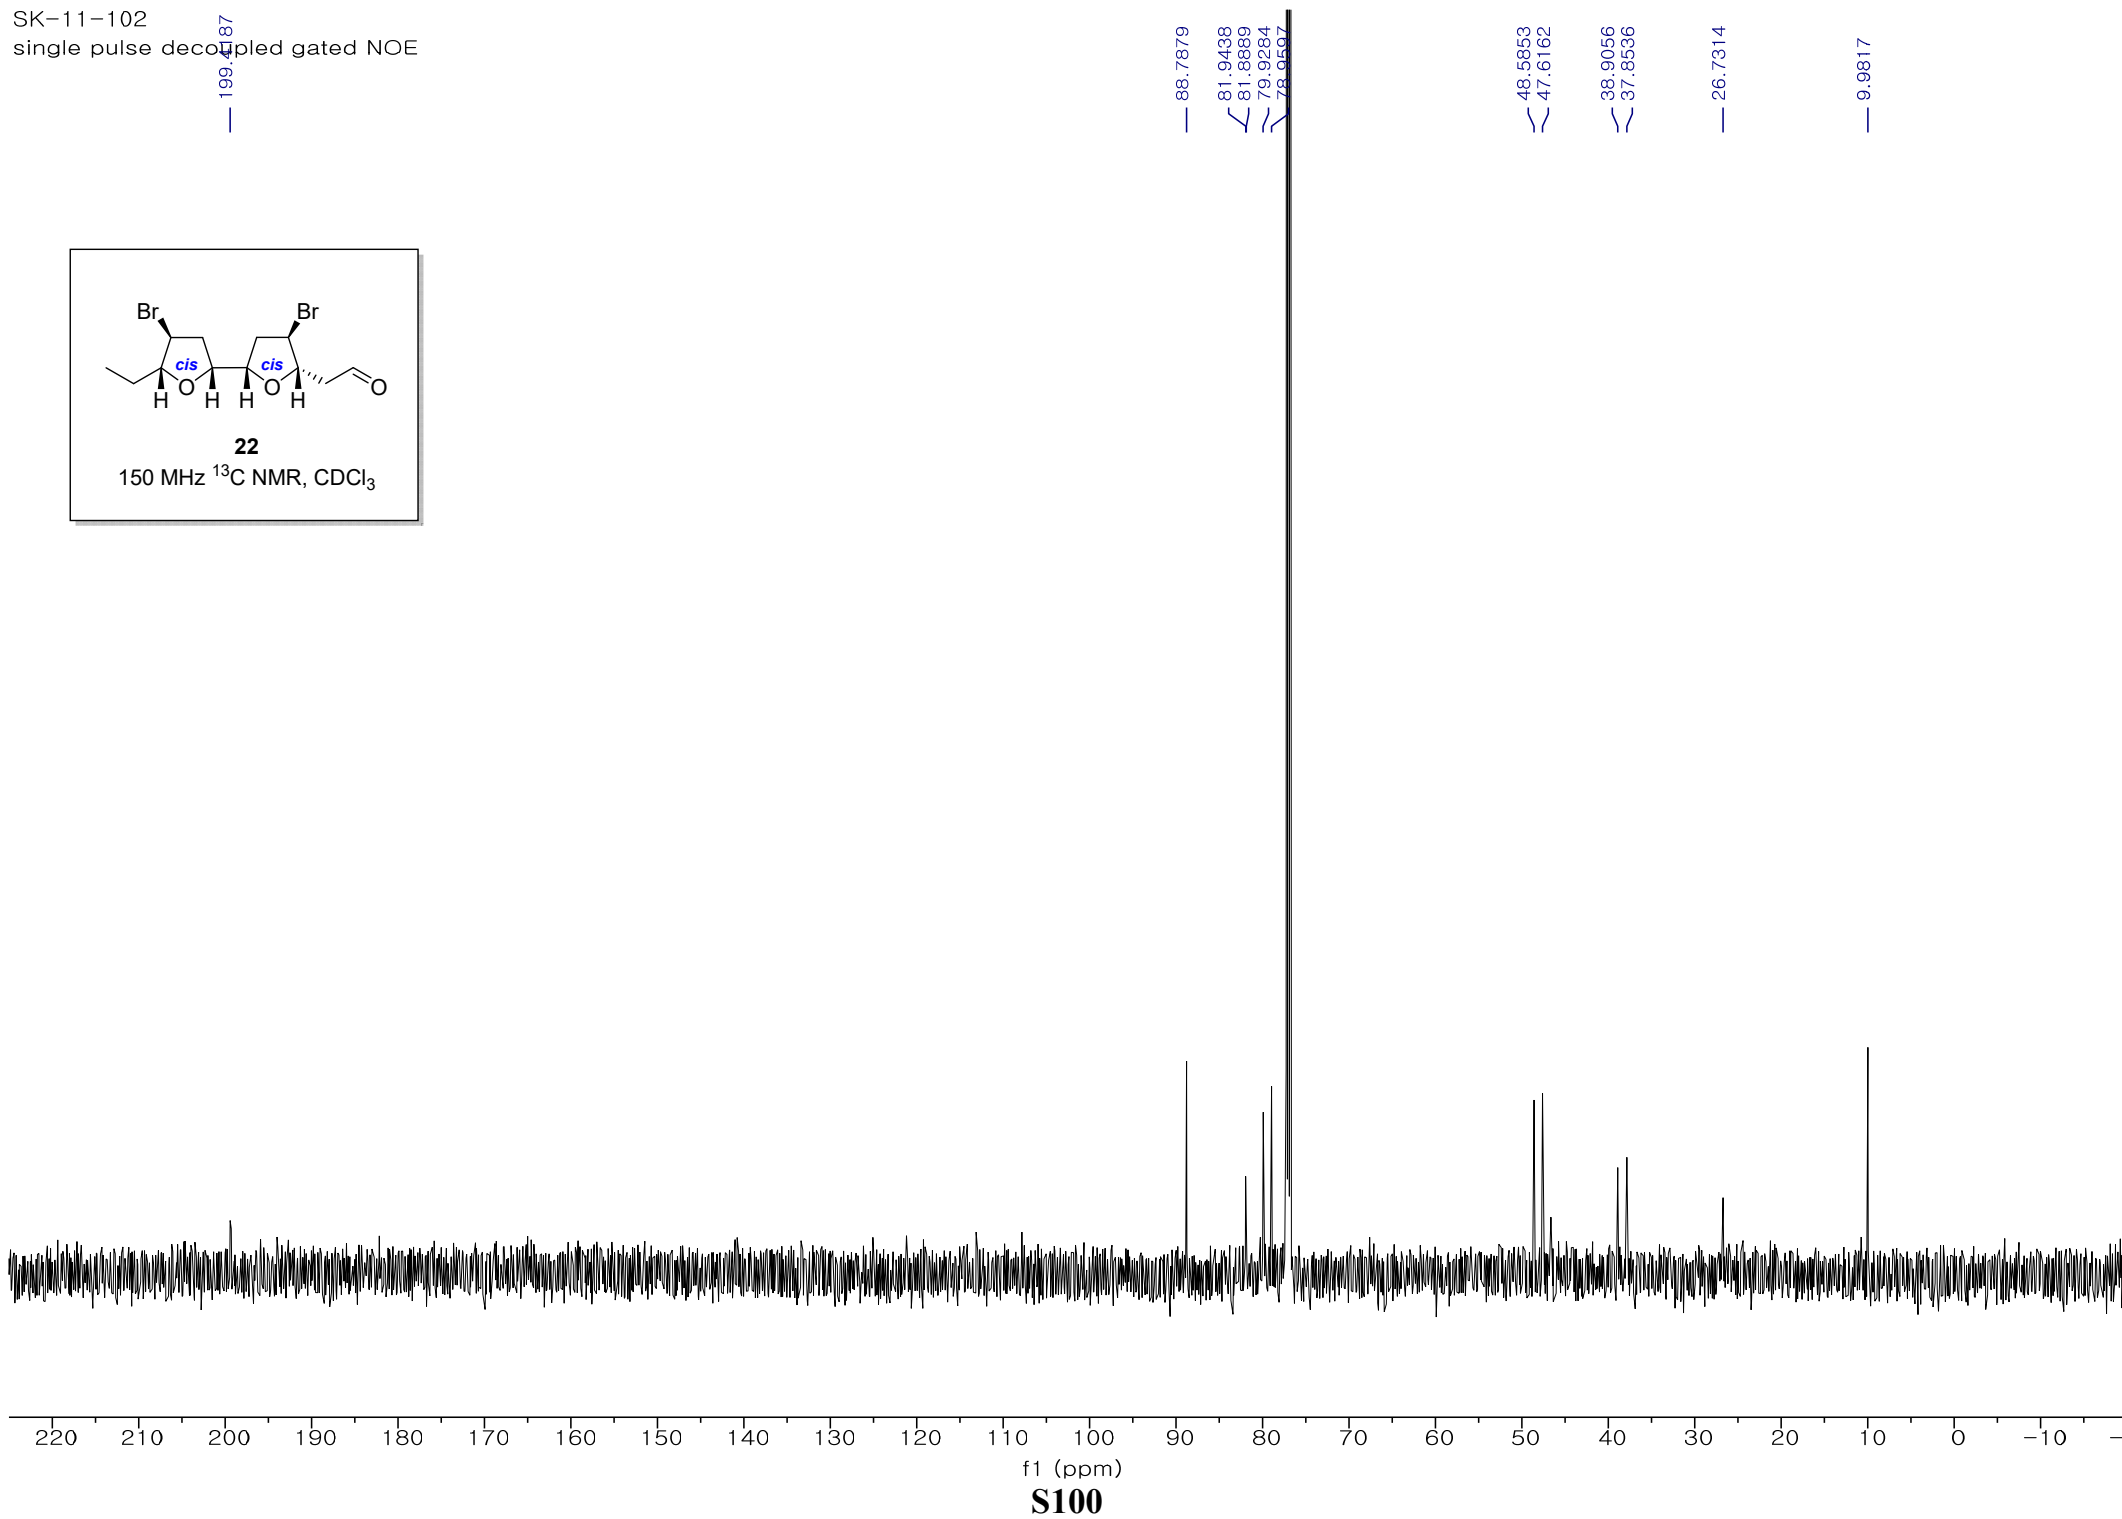

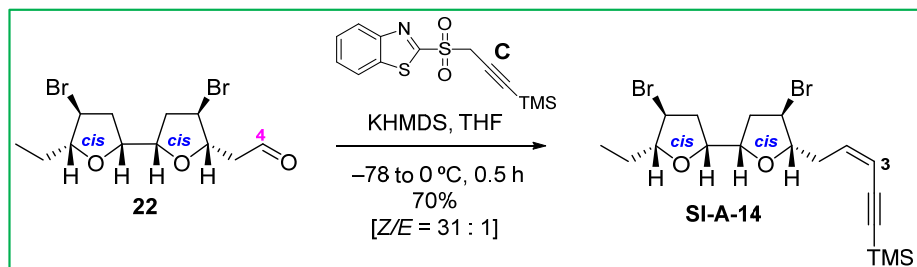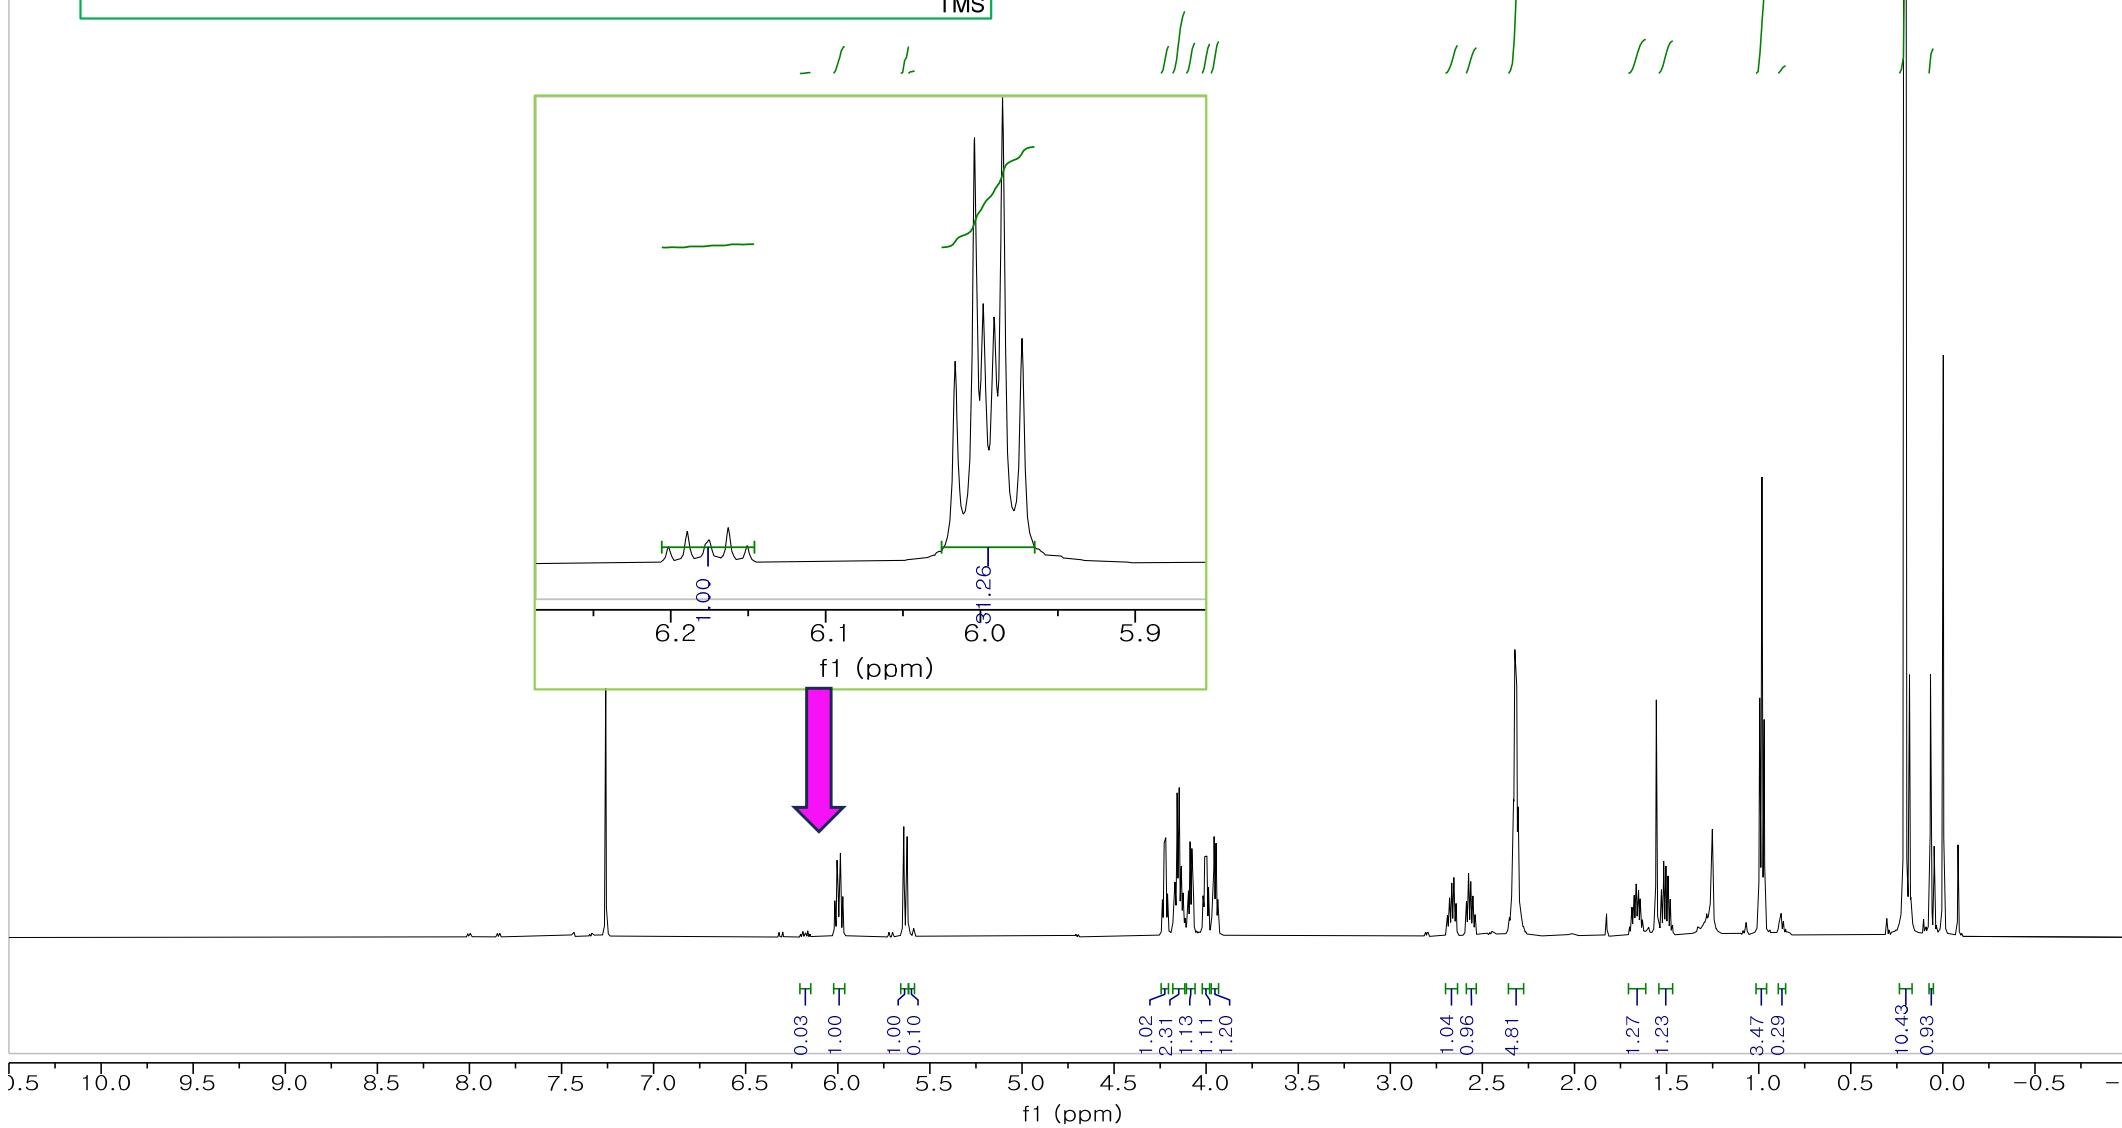

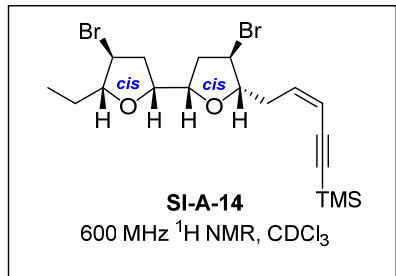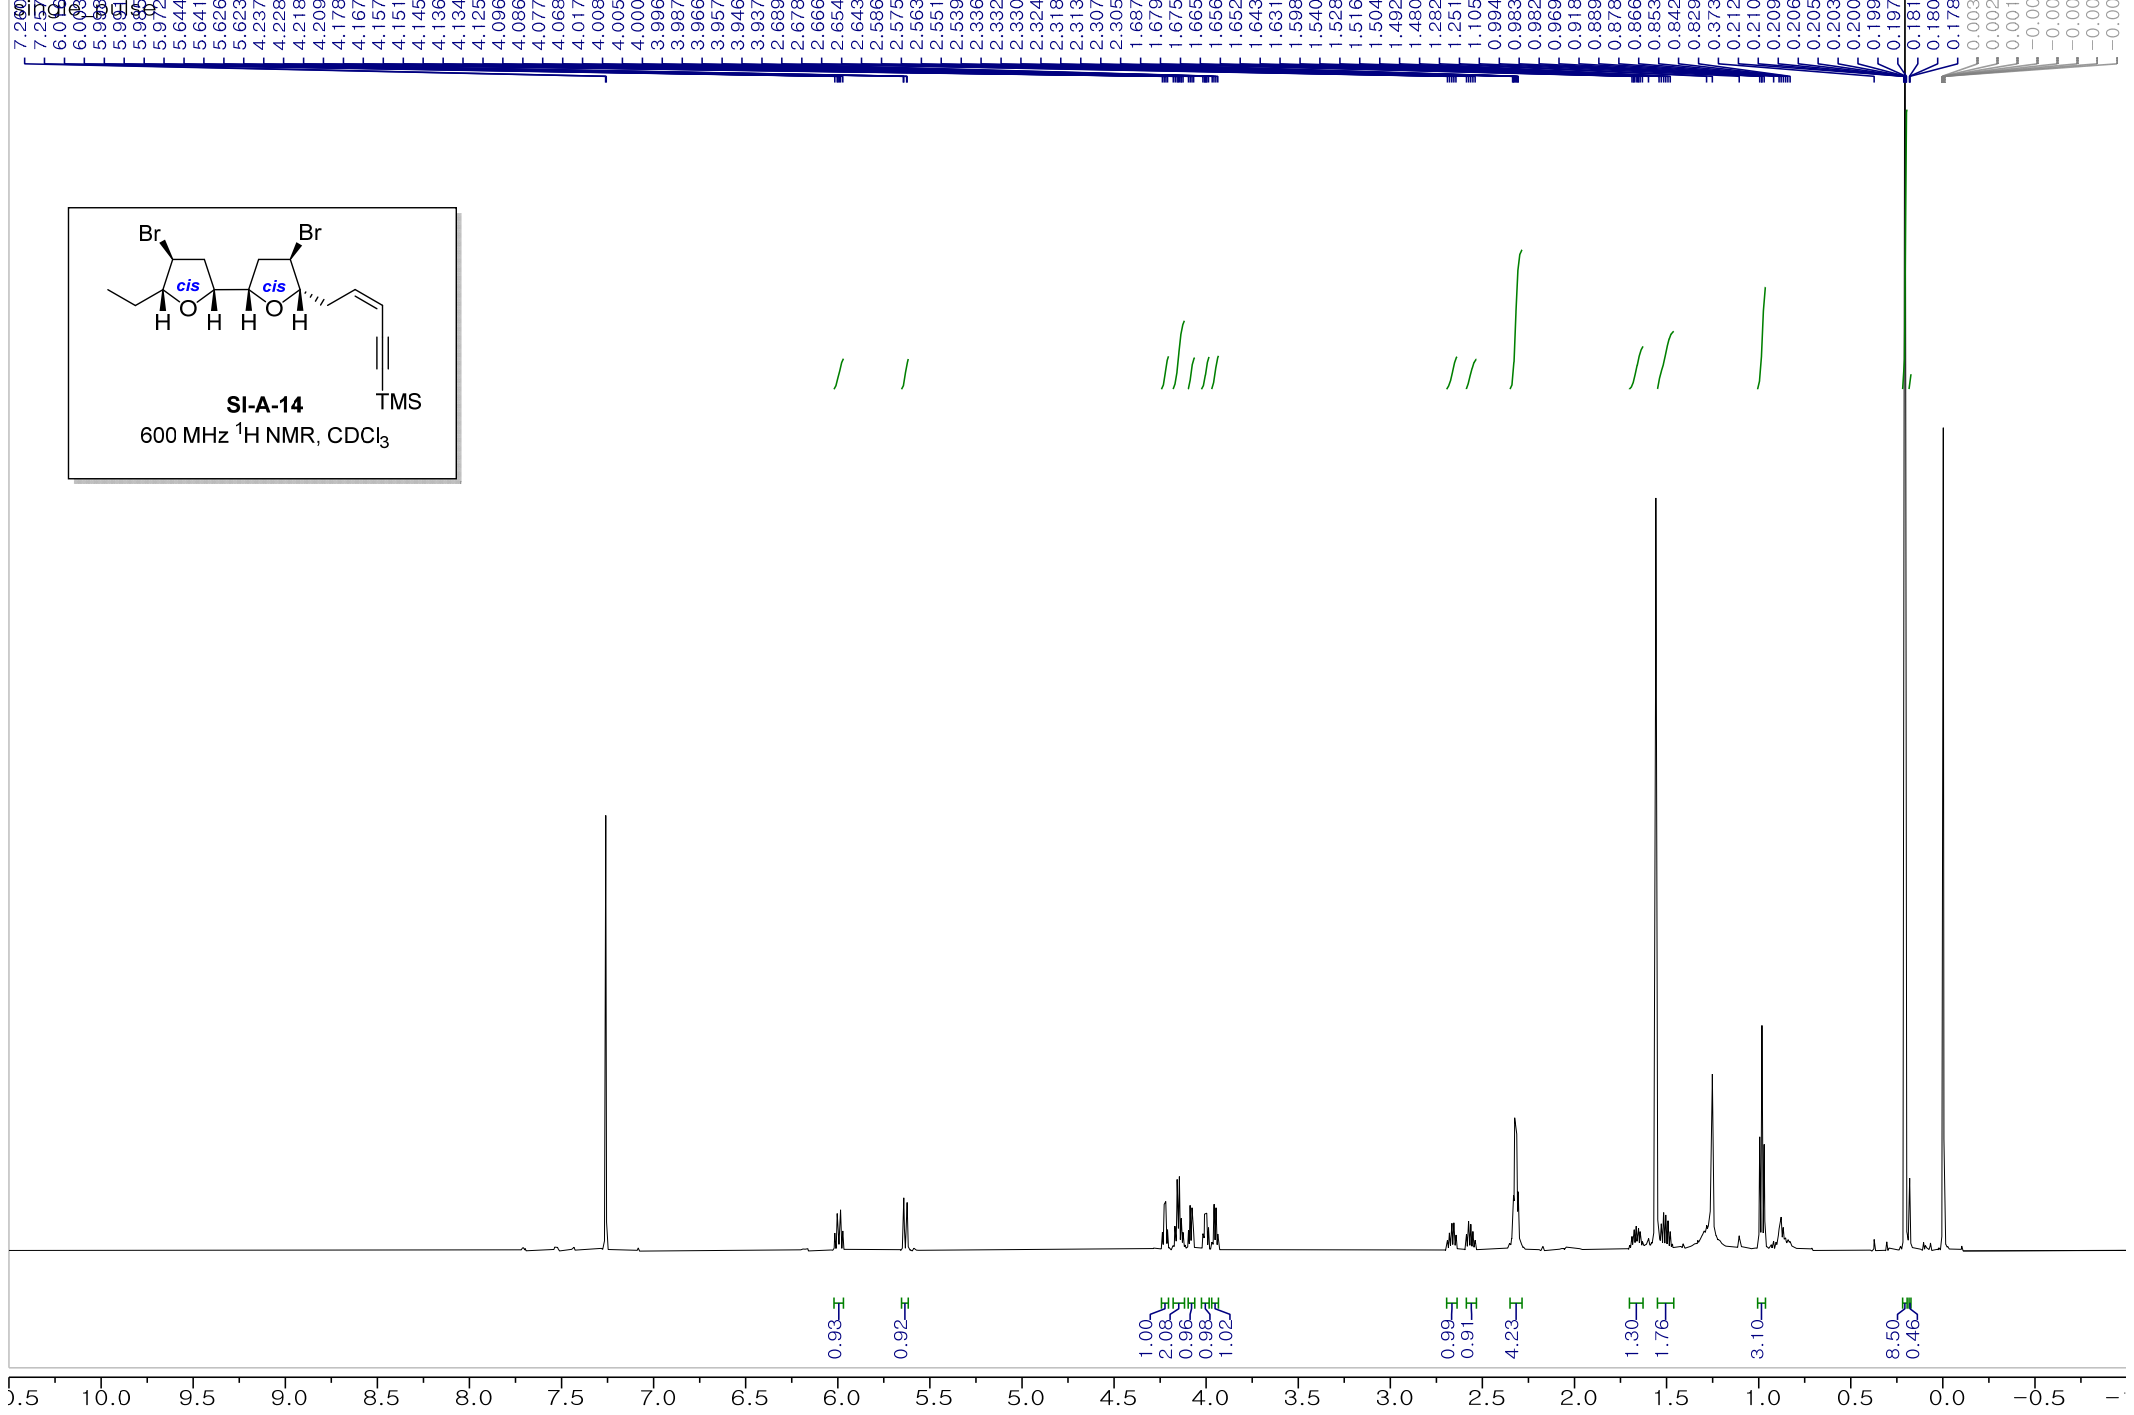

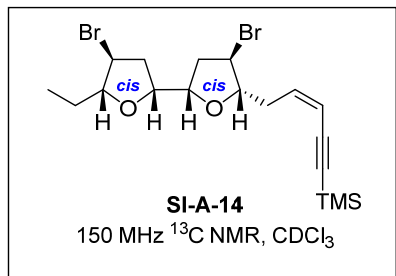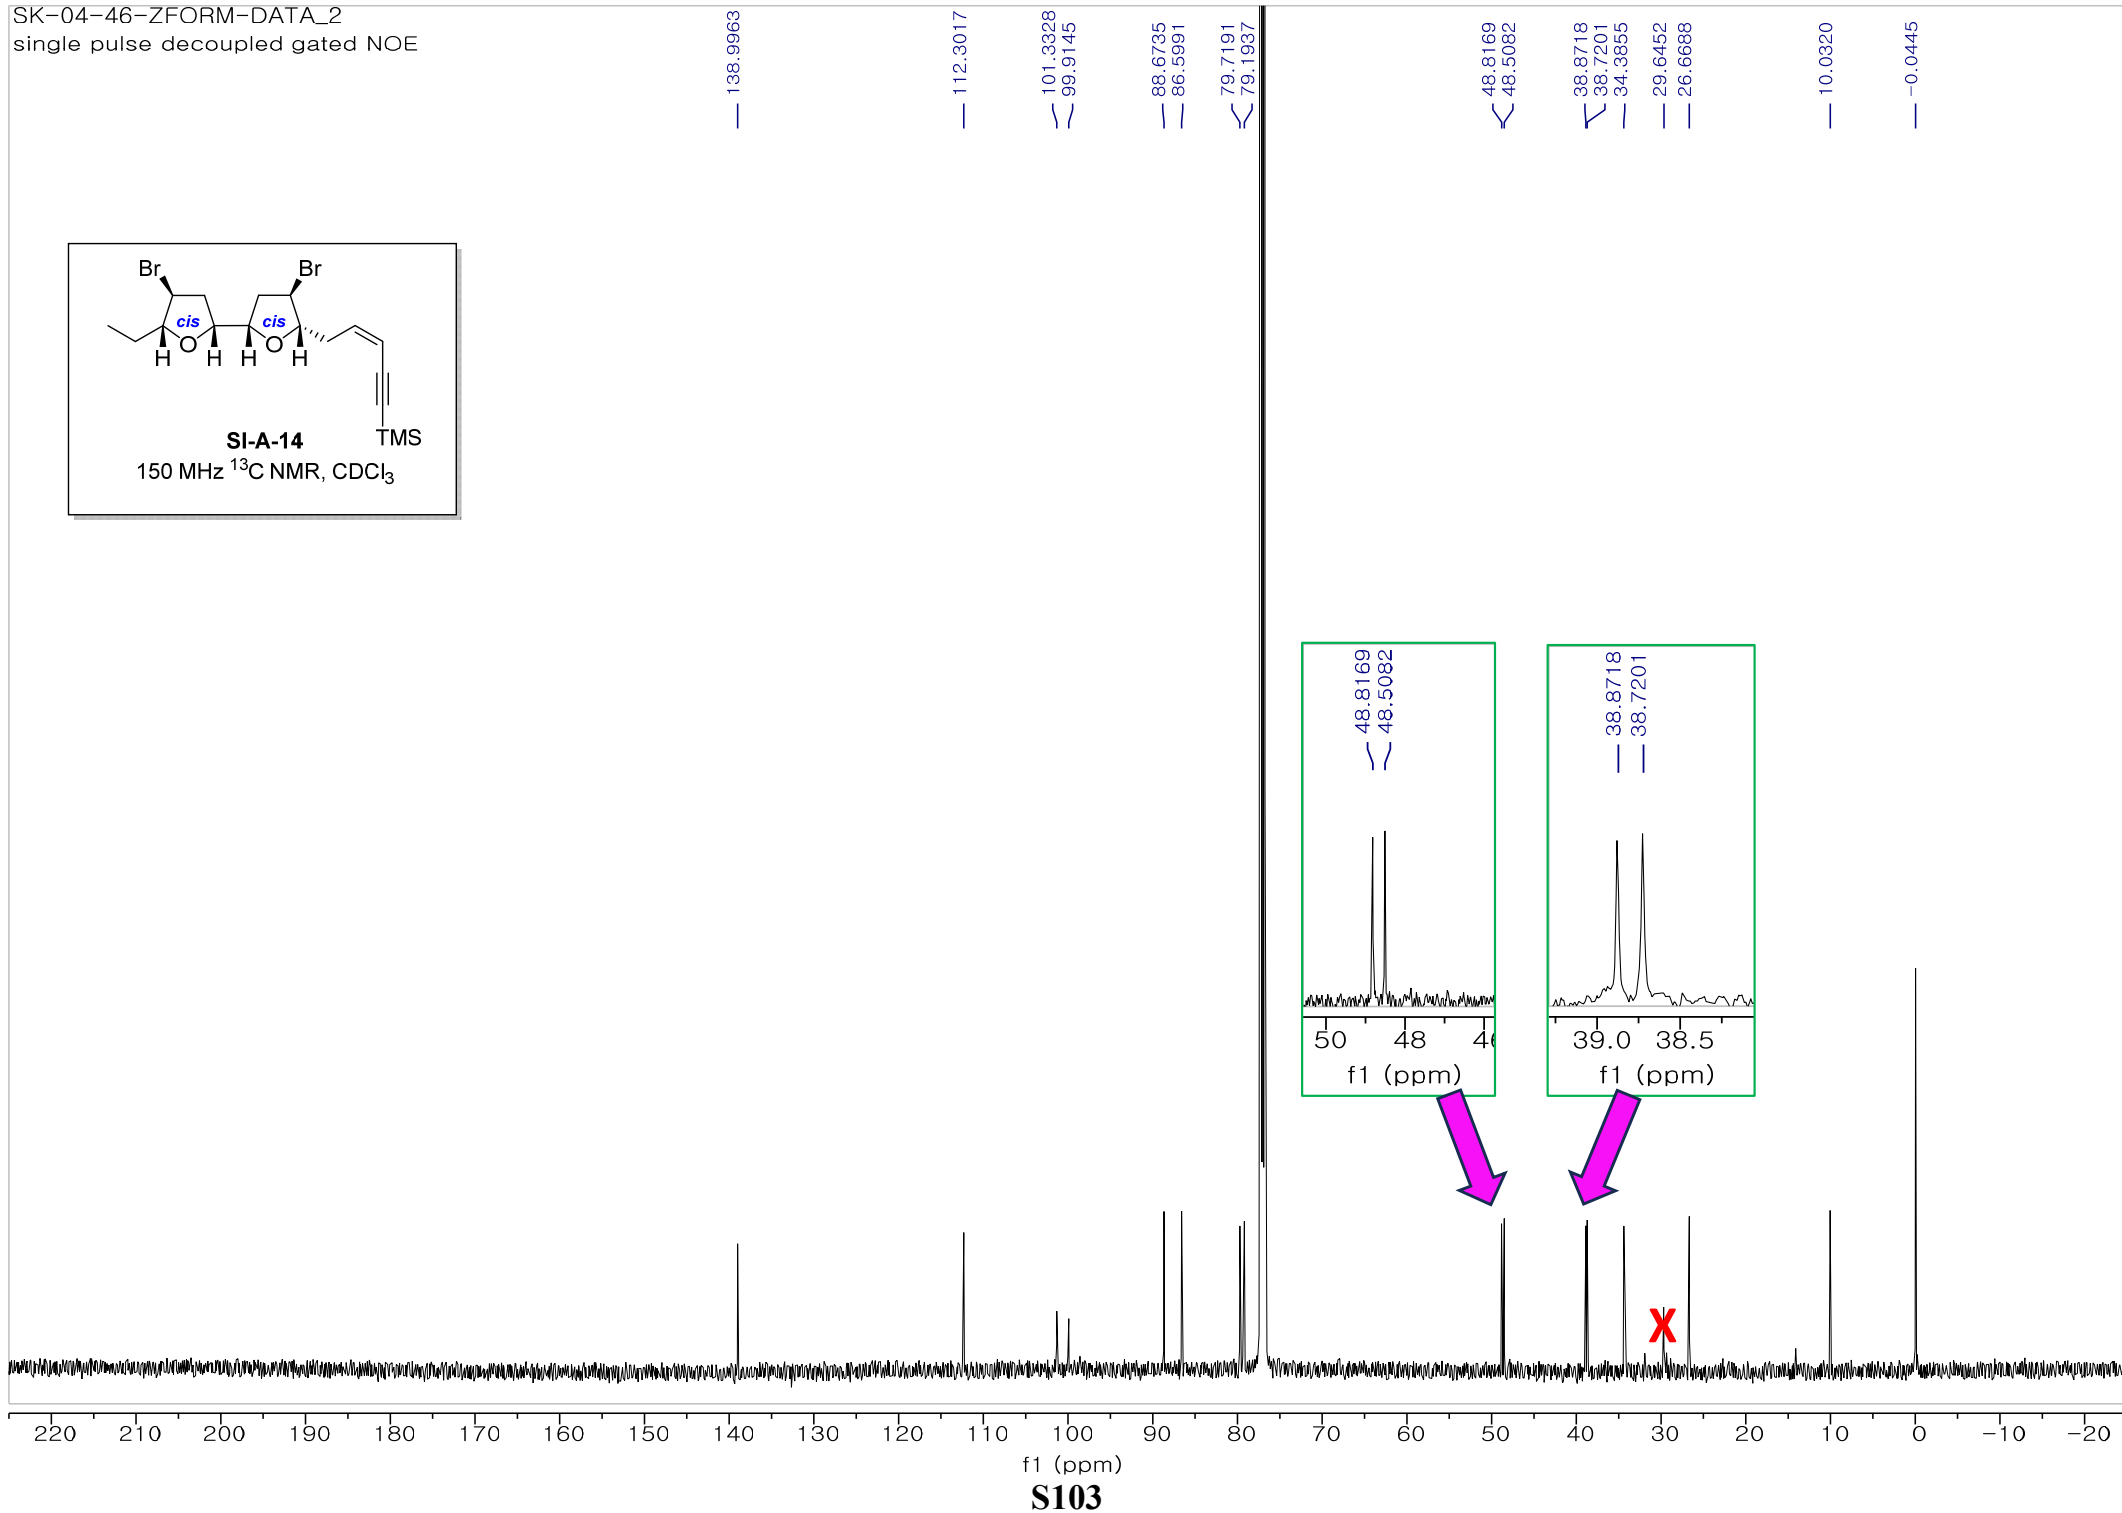

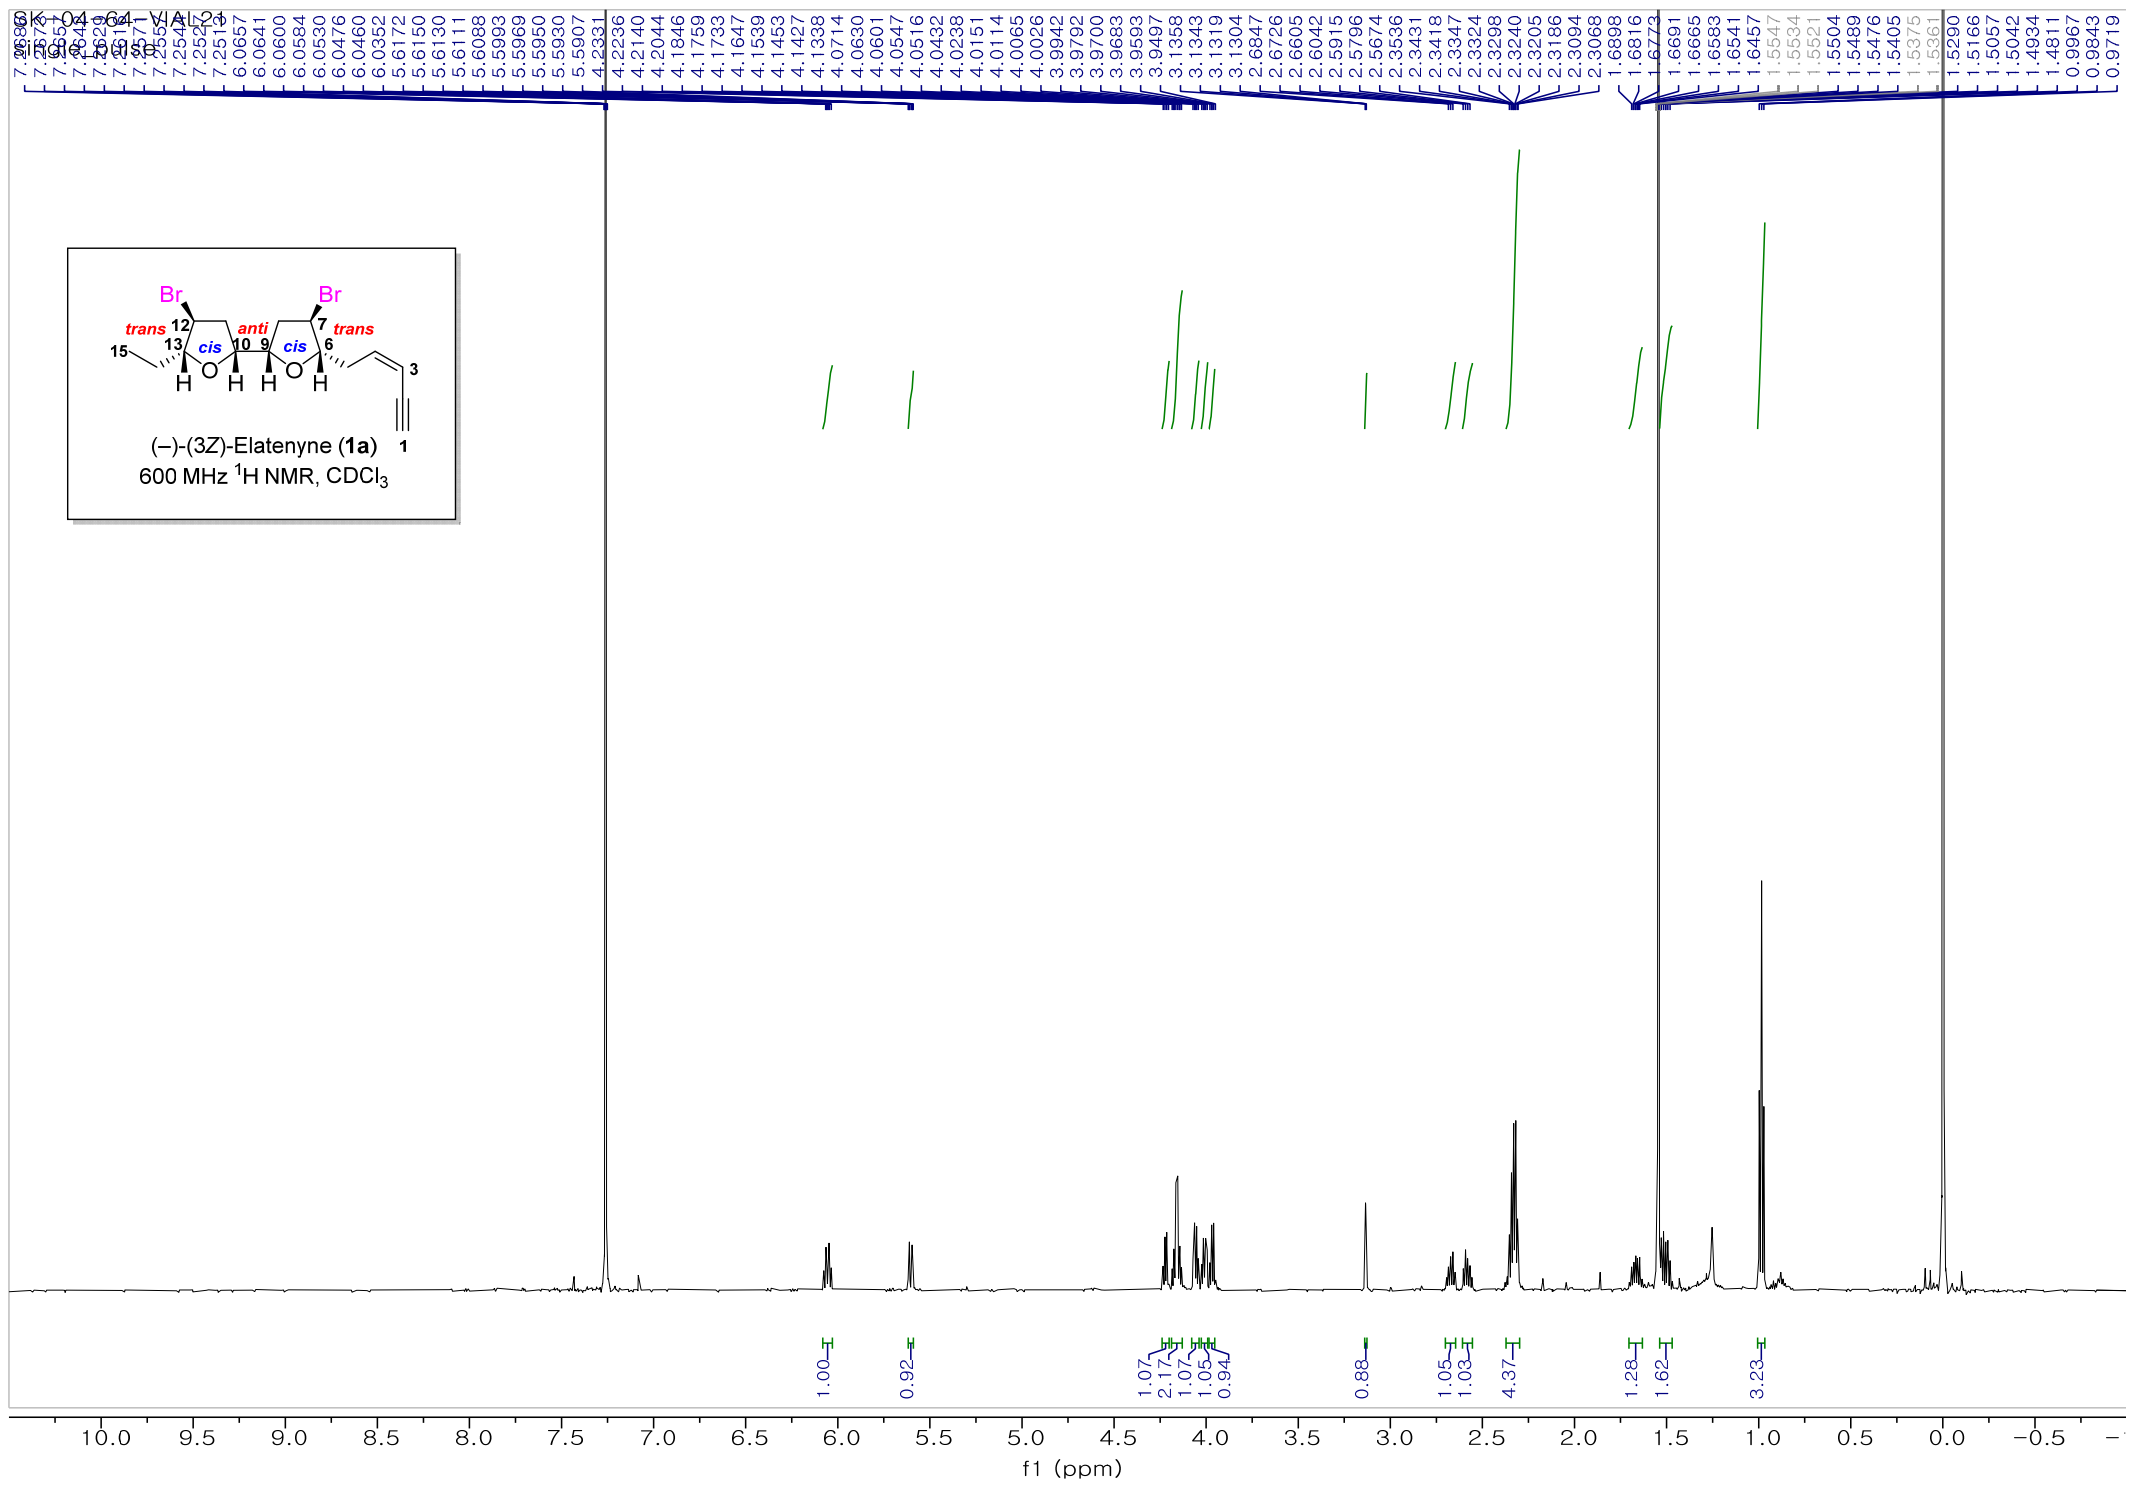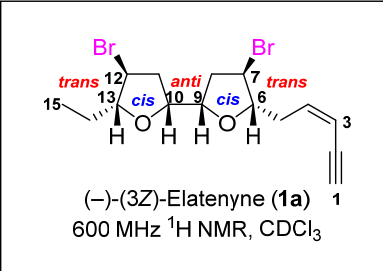



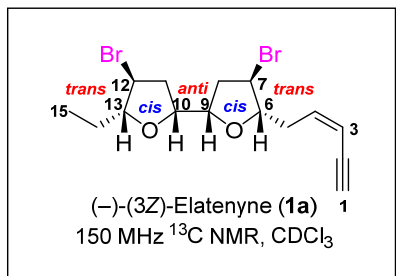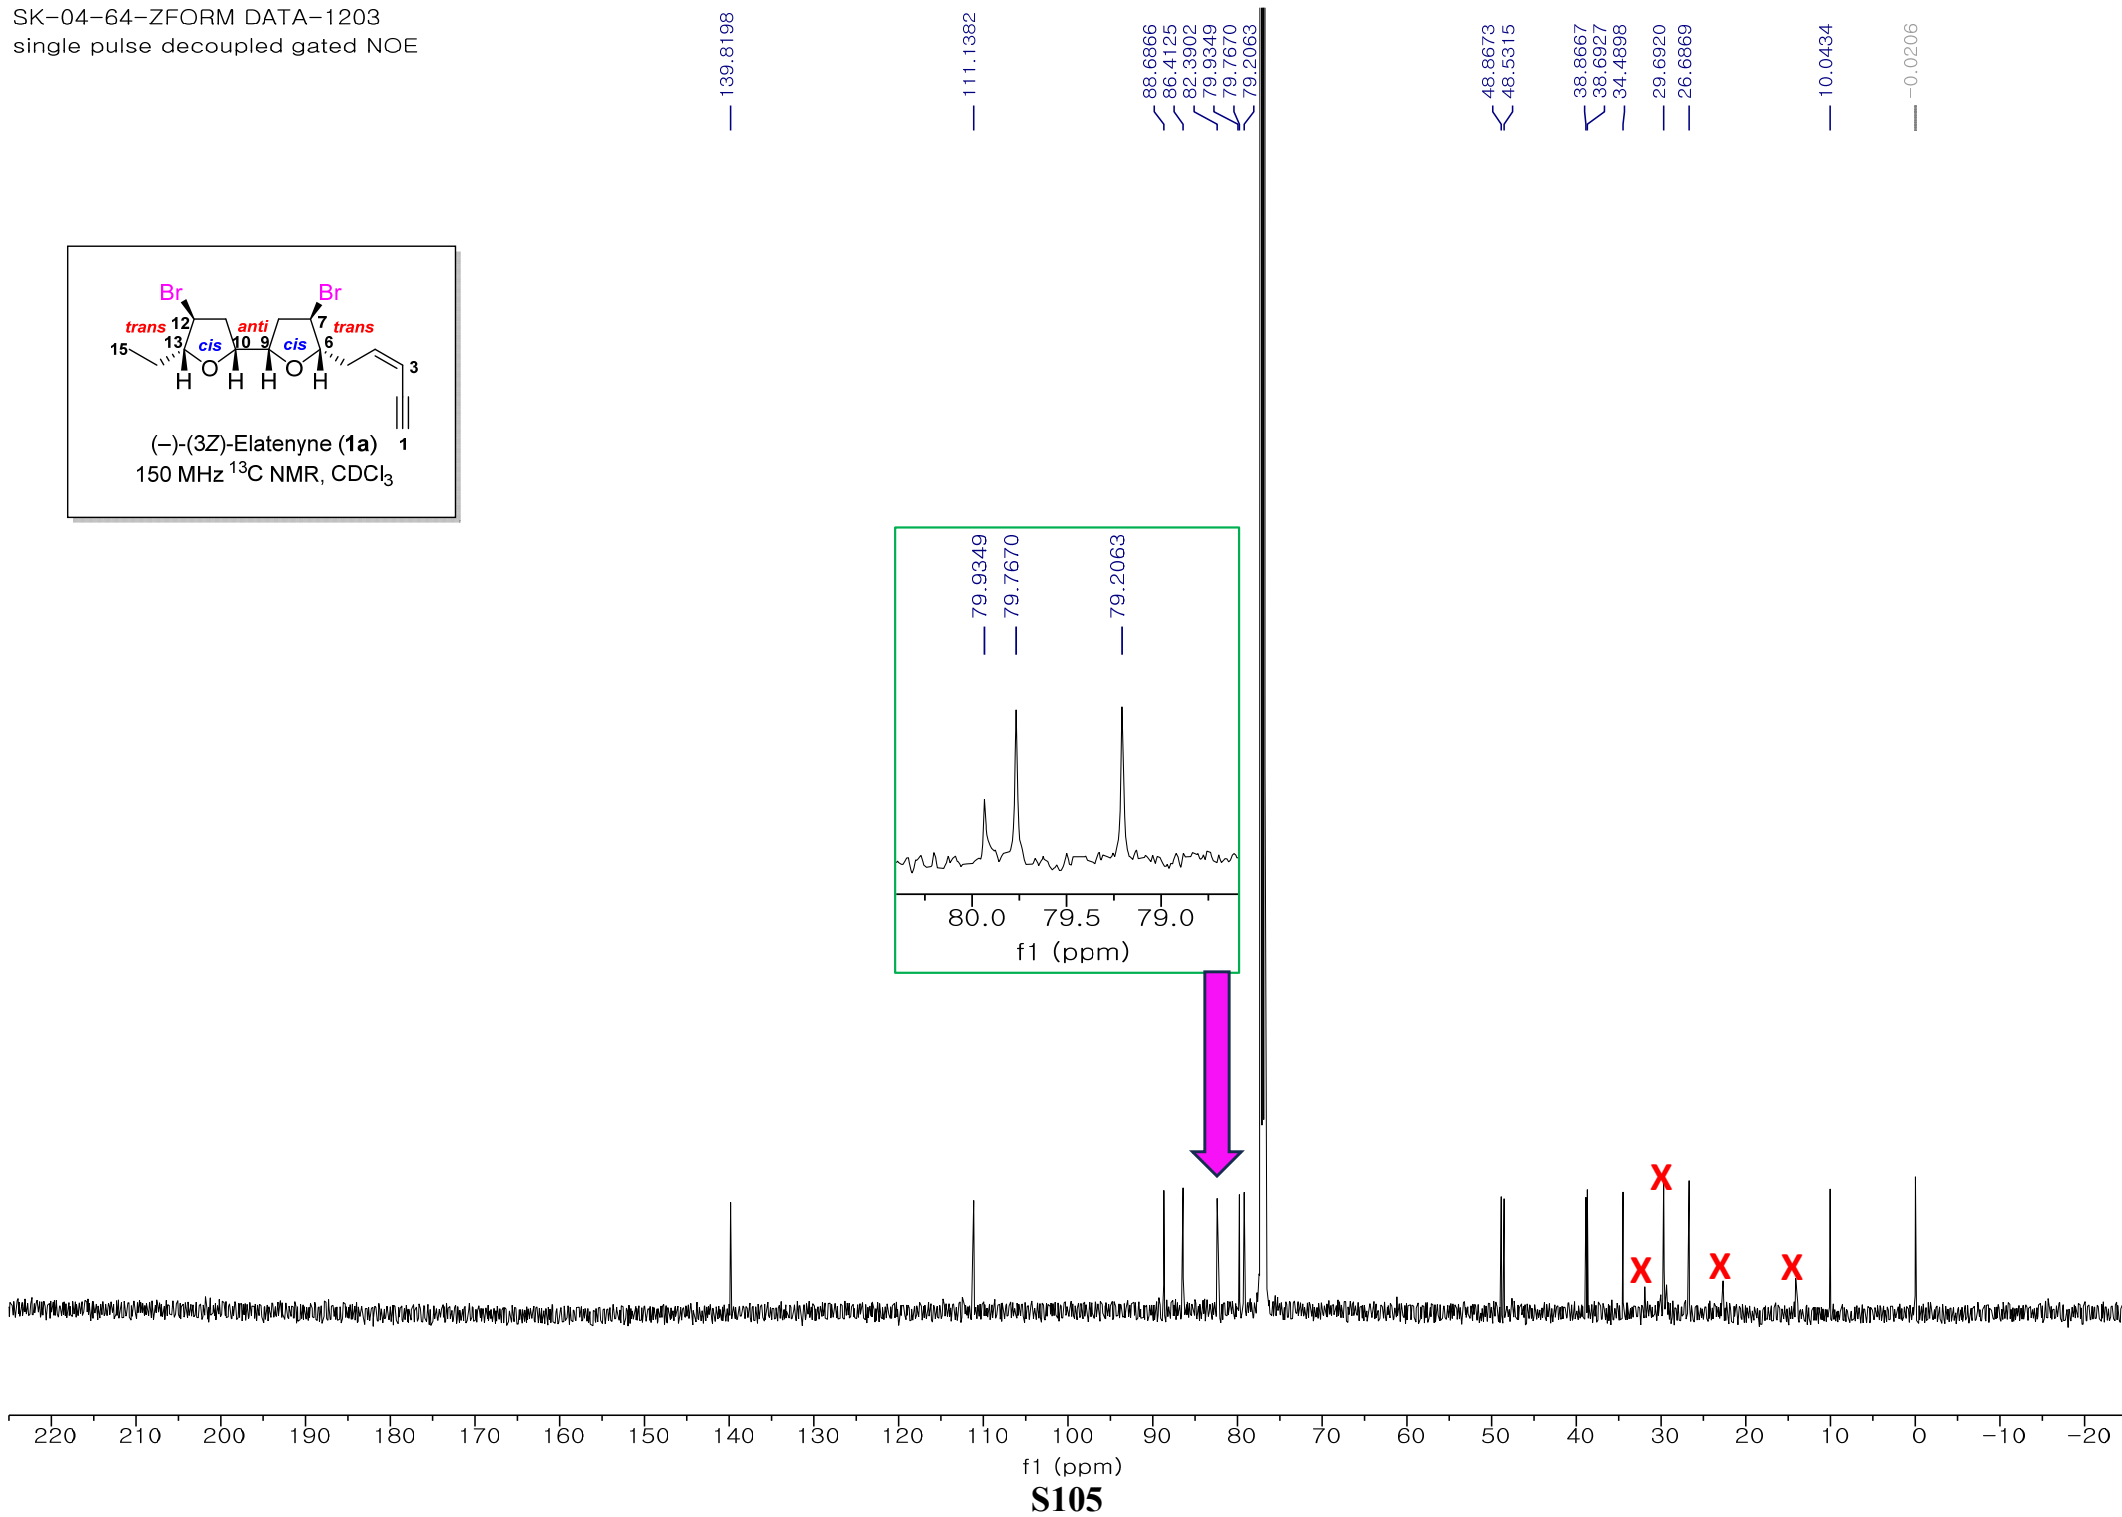

Synthetic (3Z)-Elatenyne (**1a**), (500 MHz, CDCl<sub>3</sub>, *J. Am. Chem. Soc.*, 2012, 134, 11781–11790)

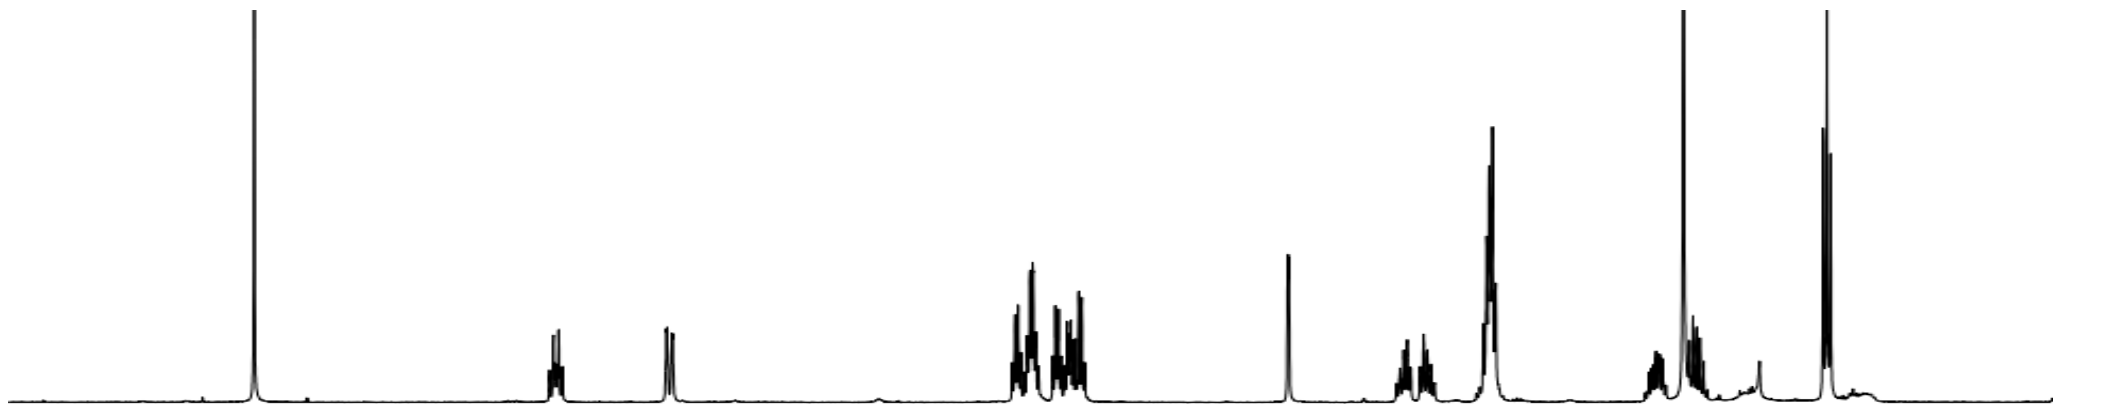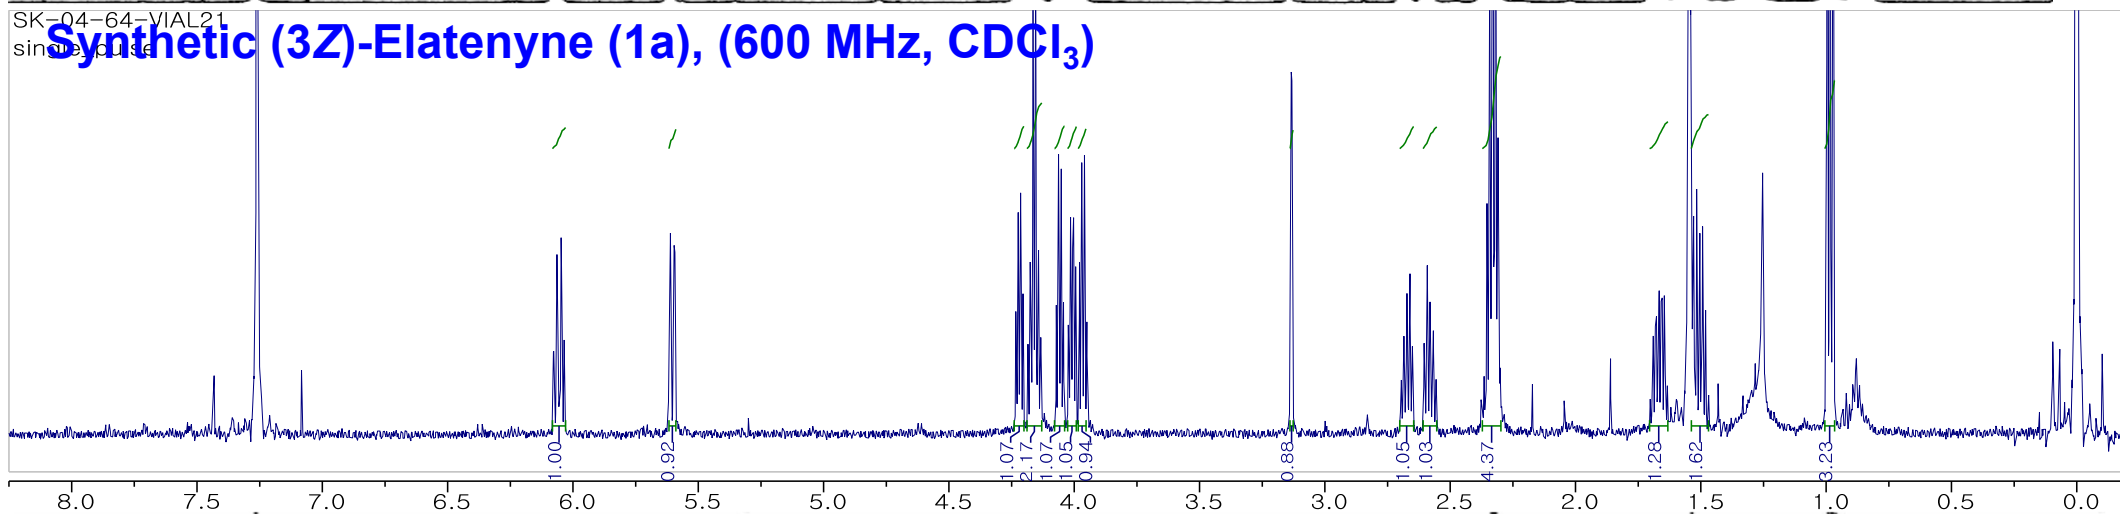

Synthetic *ent*-(3Z)-Elatenyne (*ent*-**1a**), (500 MHz, CDCl<sub>3</sub>, *J. Am. Chem. Soc.*, 2012, 134, 11781–11790)

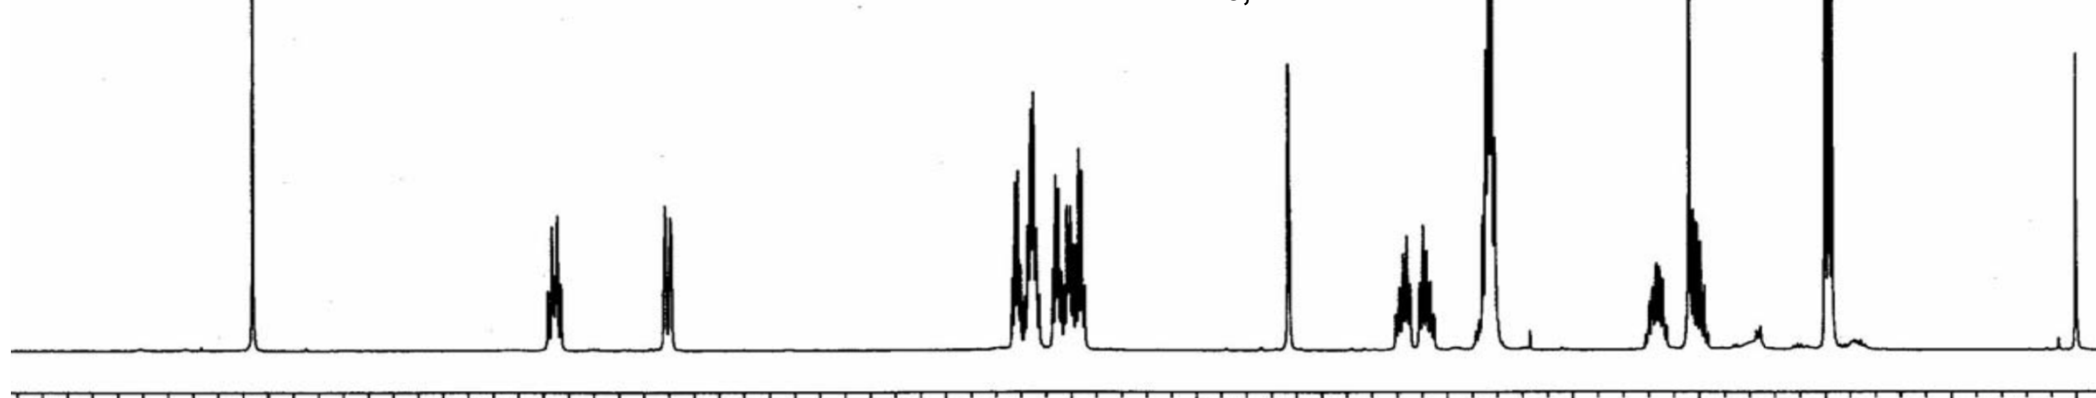

**Synthetic (3Z)-Elatenyne (1a), (125 MHz, CDCl<sub>3</sub>, *J. Am. Chem. Soc.*, 2012, 134, 11781–11790)**

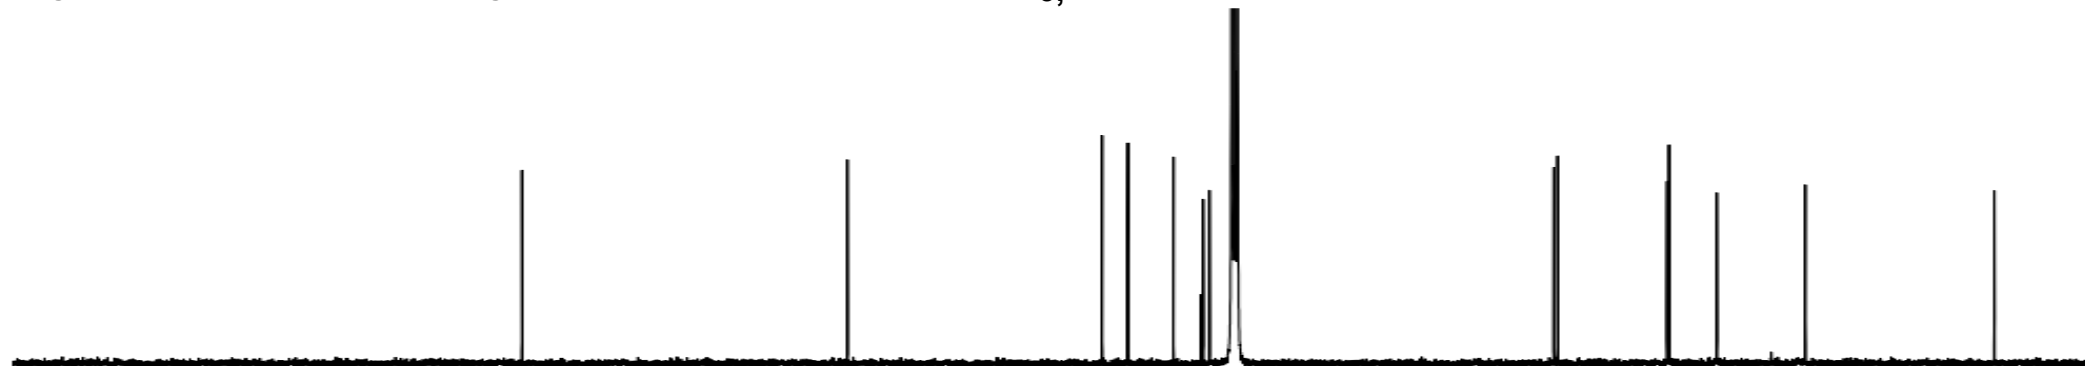

SK-04-64-ZFORM DATA-1203  
single pulse decoupled gated NOE

**Kim's Synthetic (3Z)-Elatenyne (1a), (150 MHz, CDCl<sub>3</sub>)**

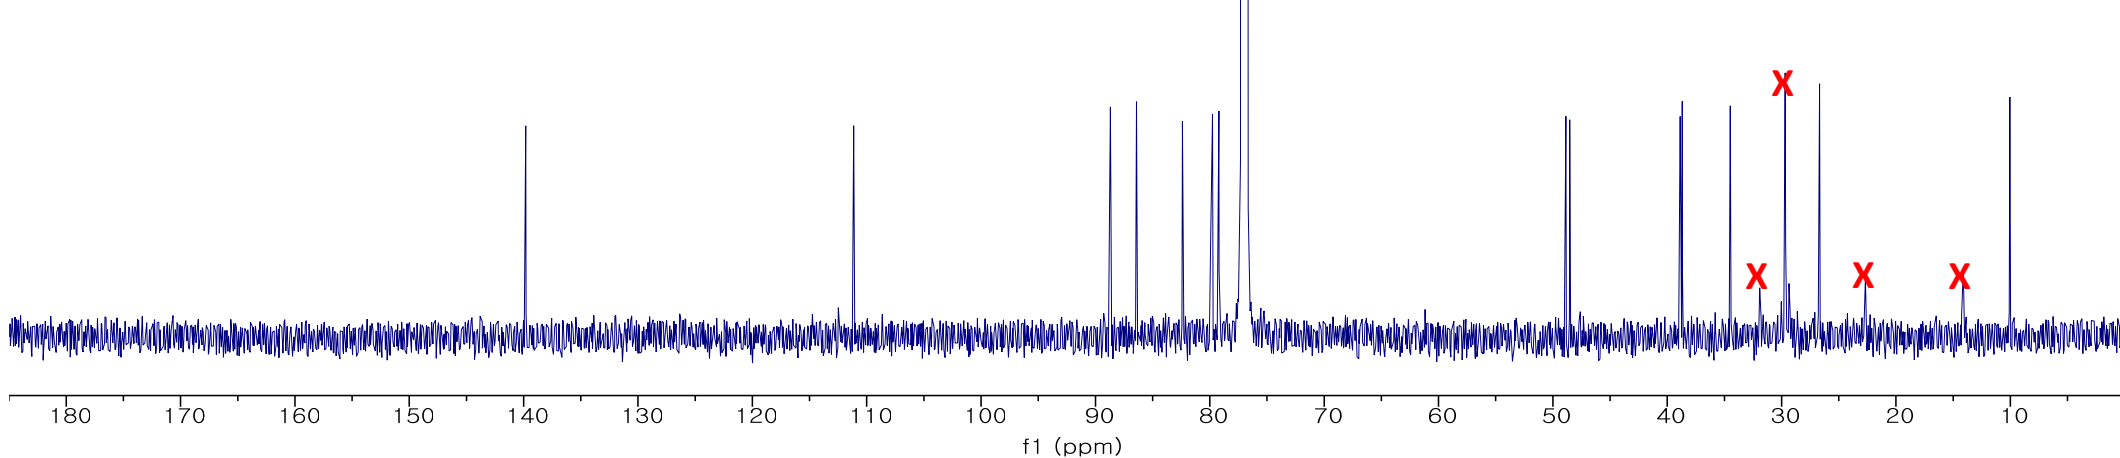

**Synthetic *ent*-(3Z)-Elatenyne (*ent*-1a), (125 MHz, CDCl<sub>3</sub>, *J. Am. Chem. Soc.*, 2012, 134, 11781–11790)**

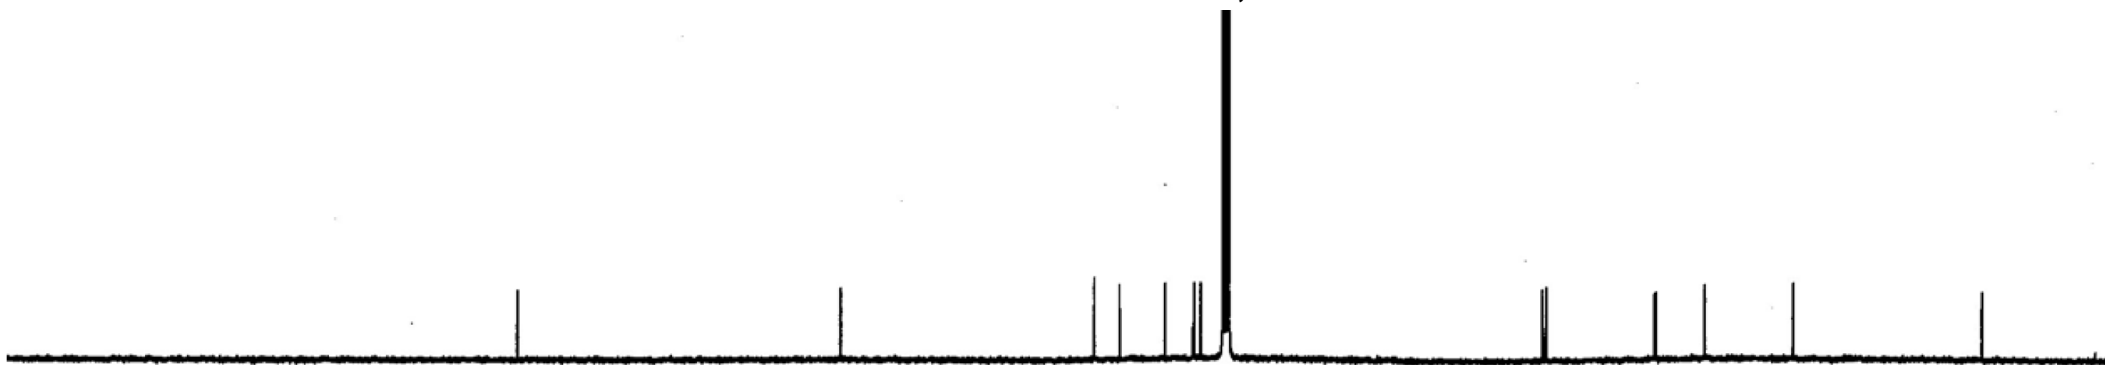

SK-11-105  
single\_pulse

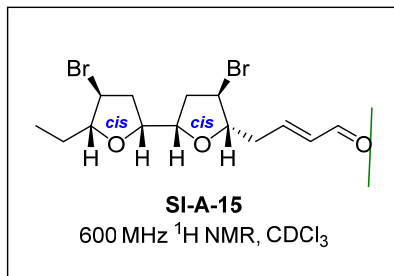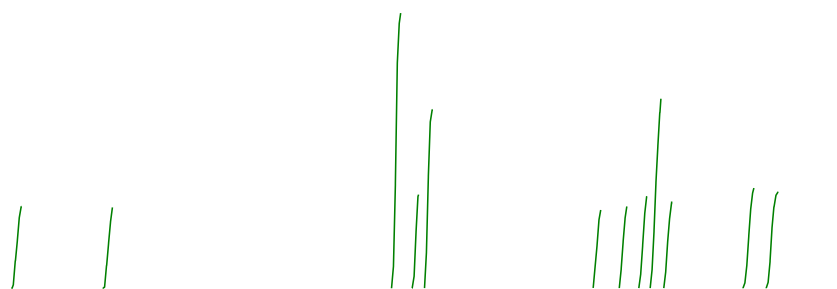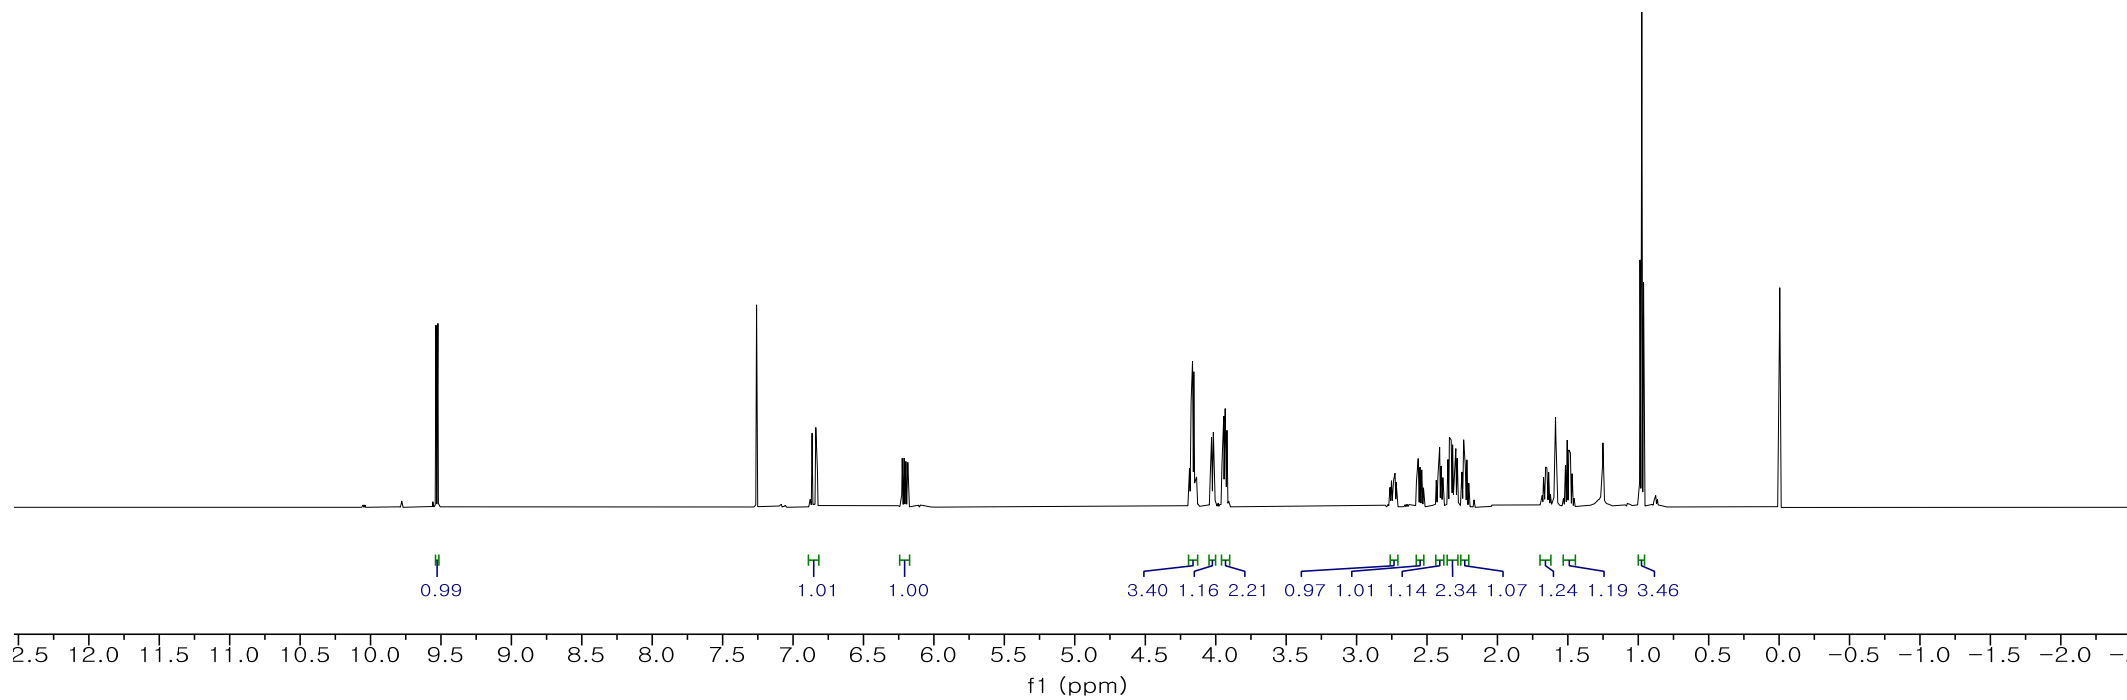

S108

SK-11-105  
single pulse decoupled gated NOE

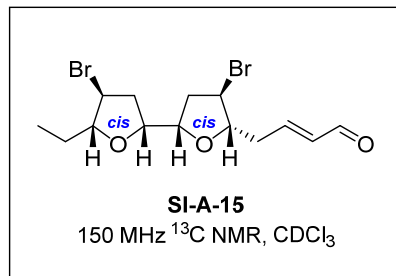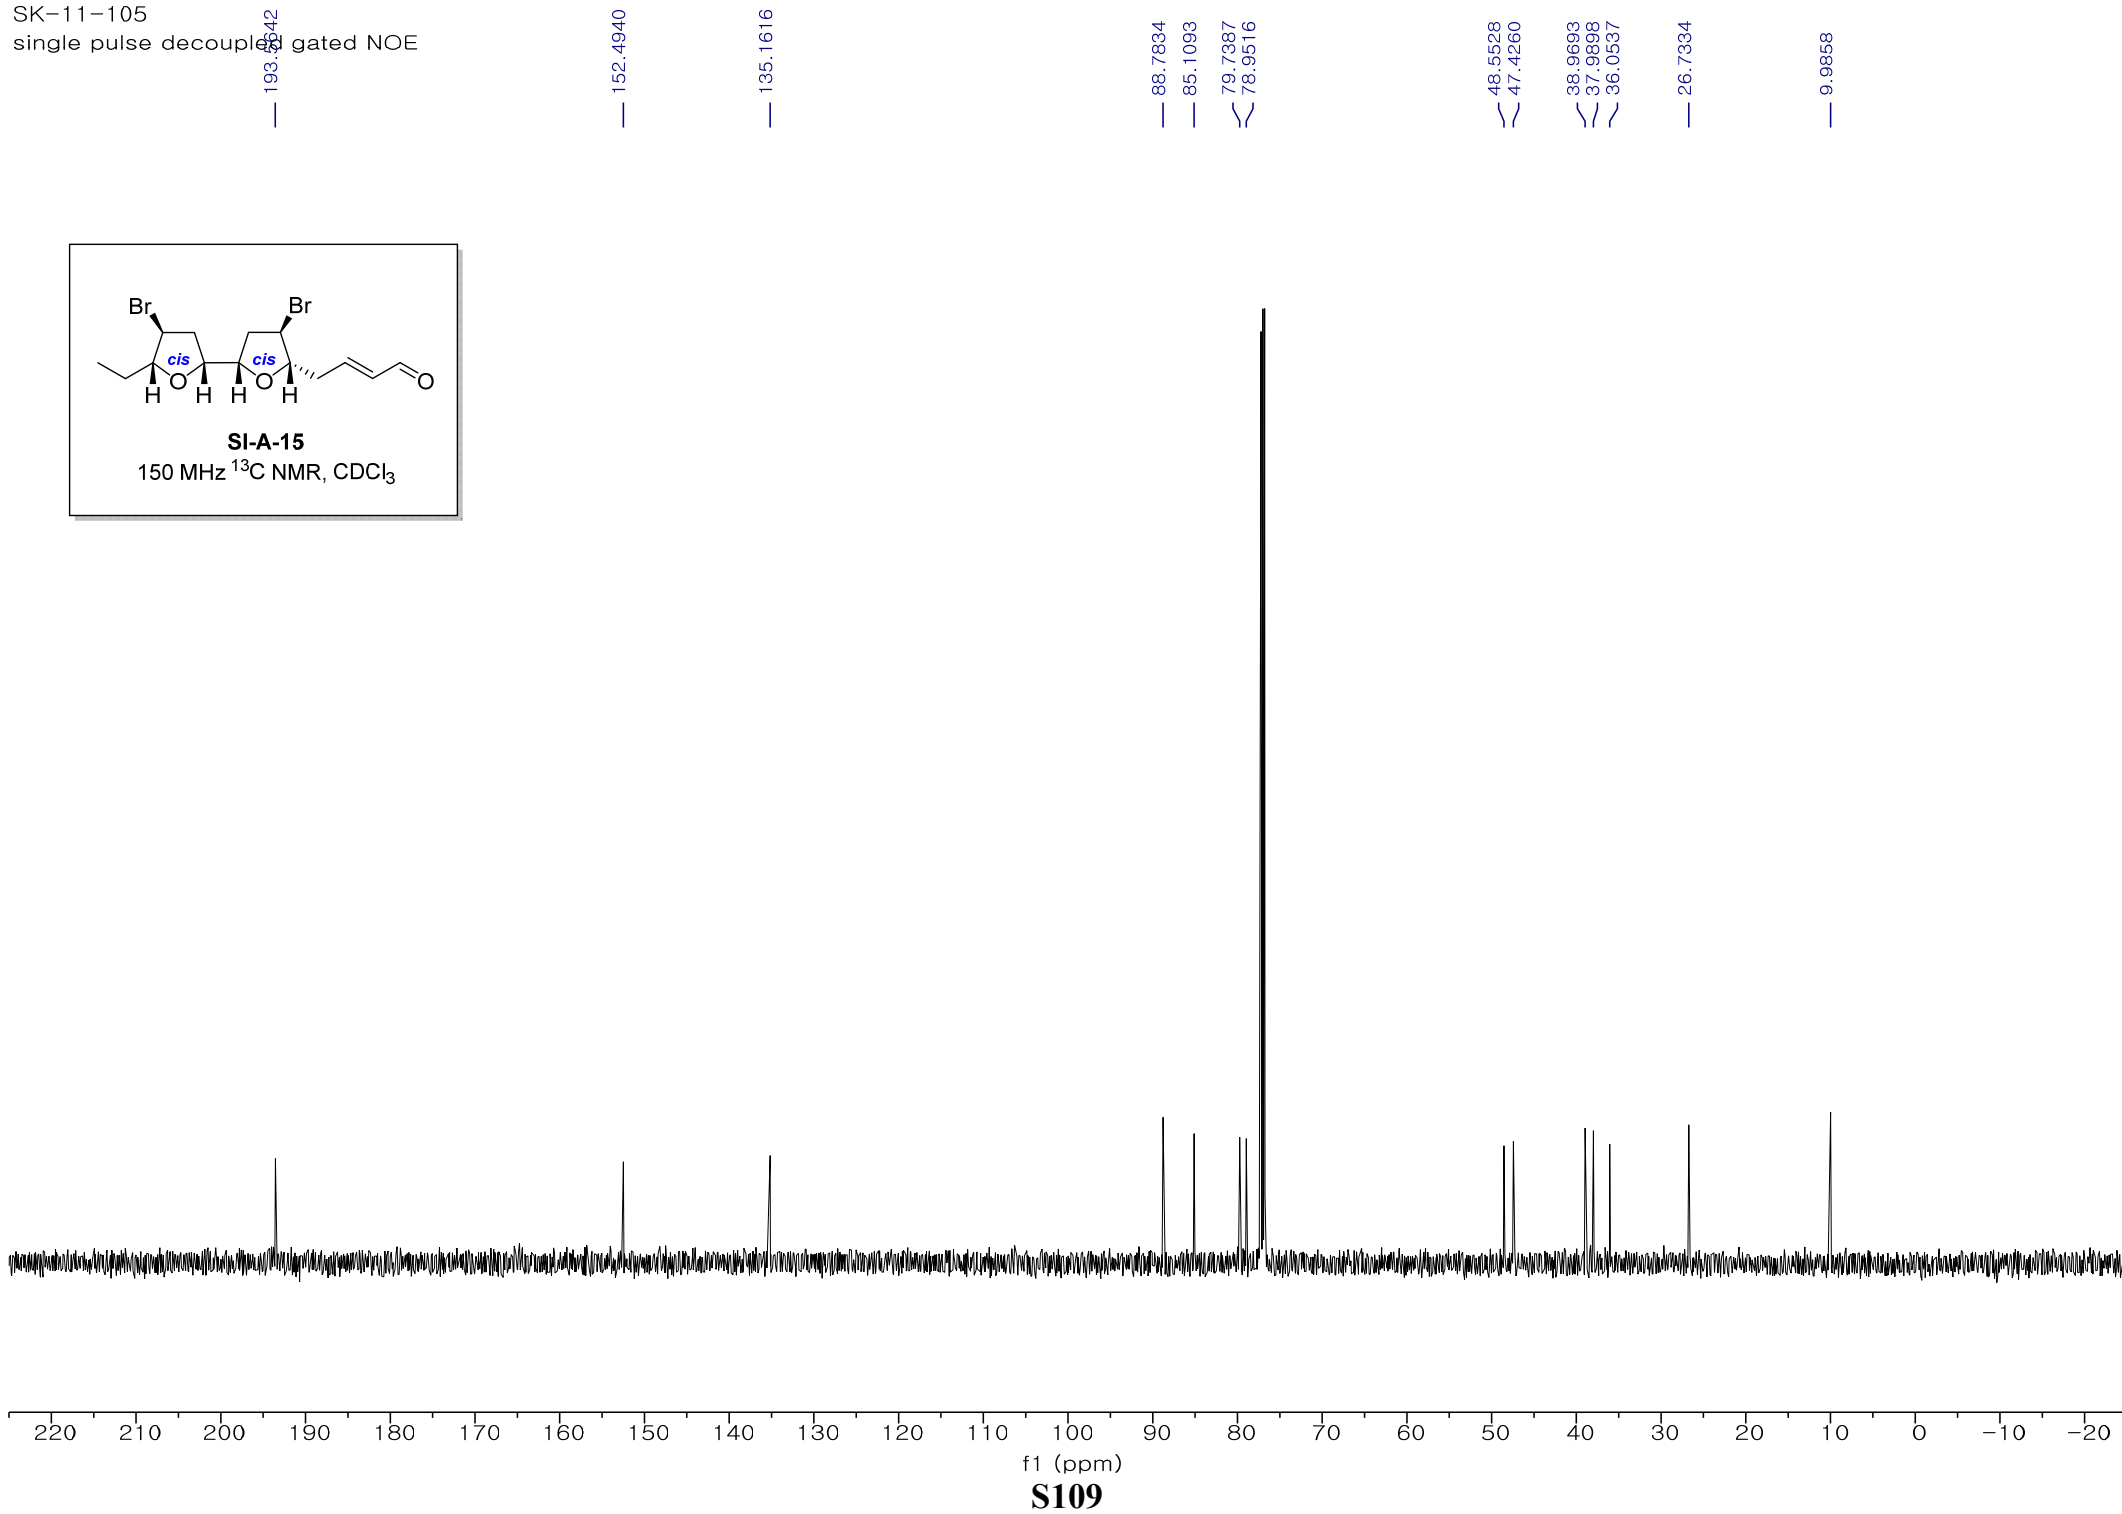

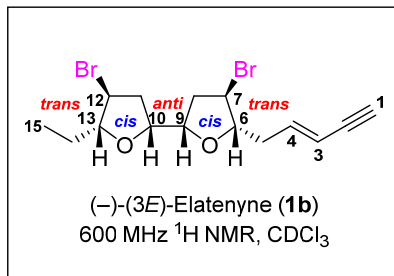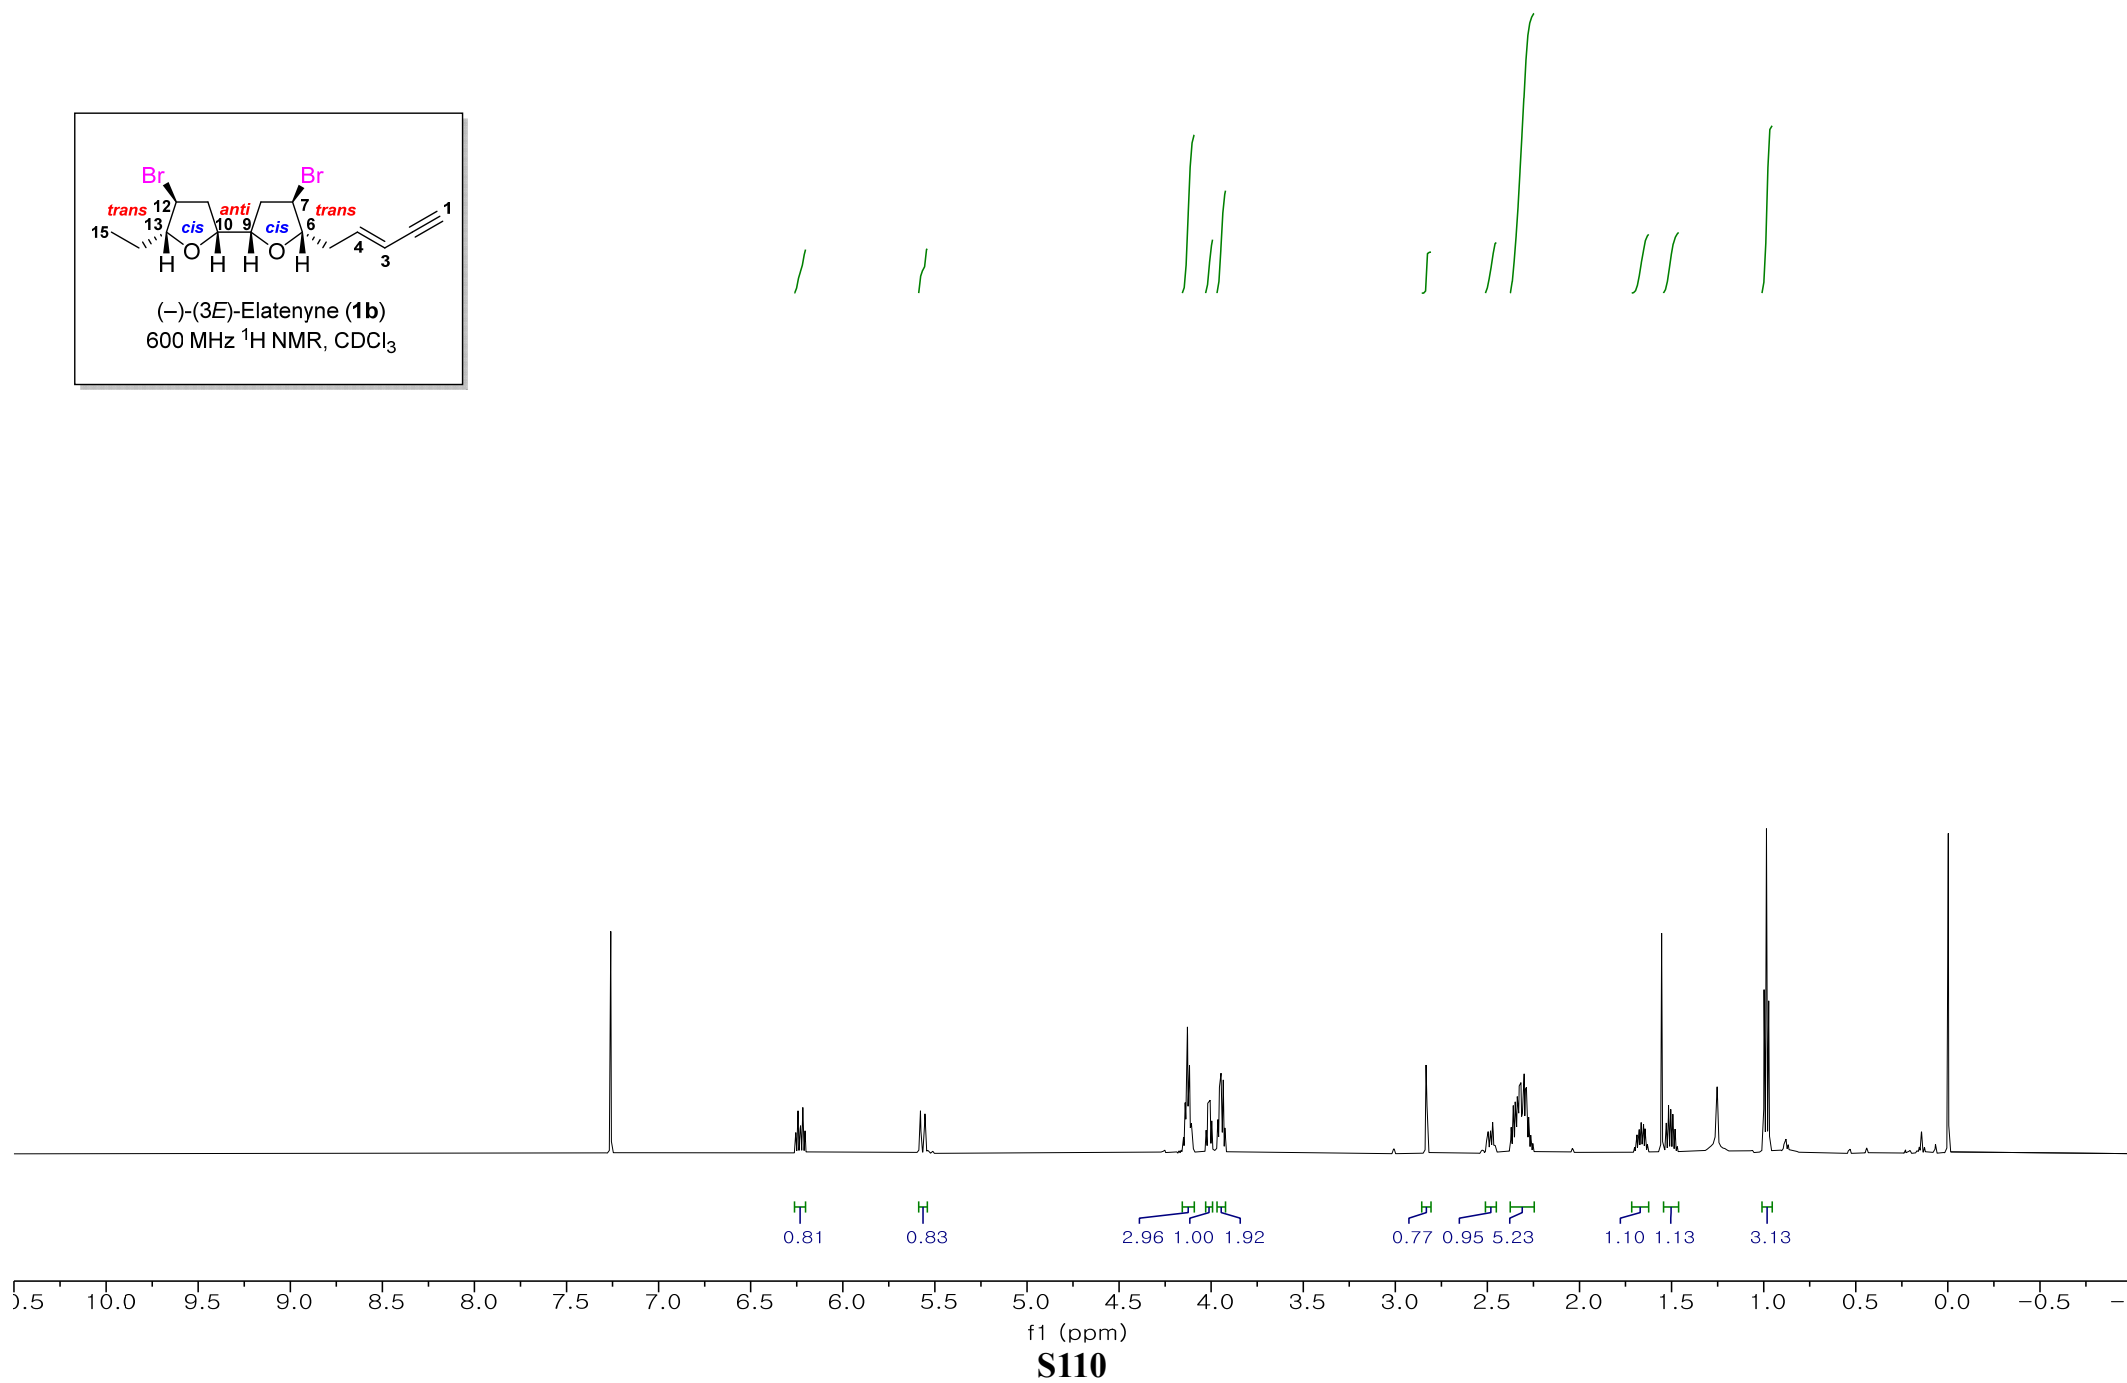

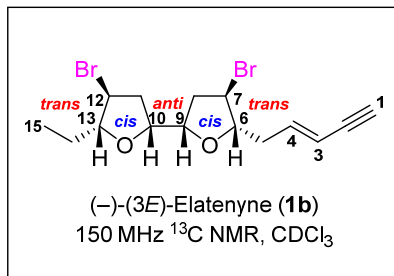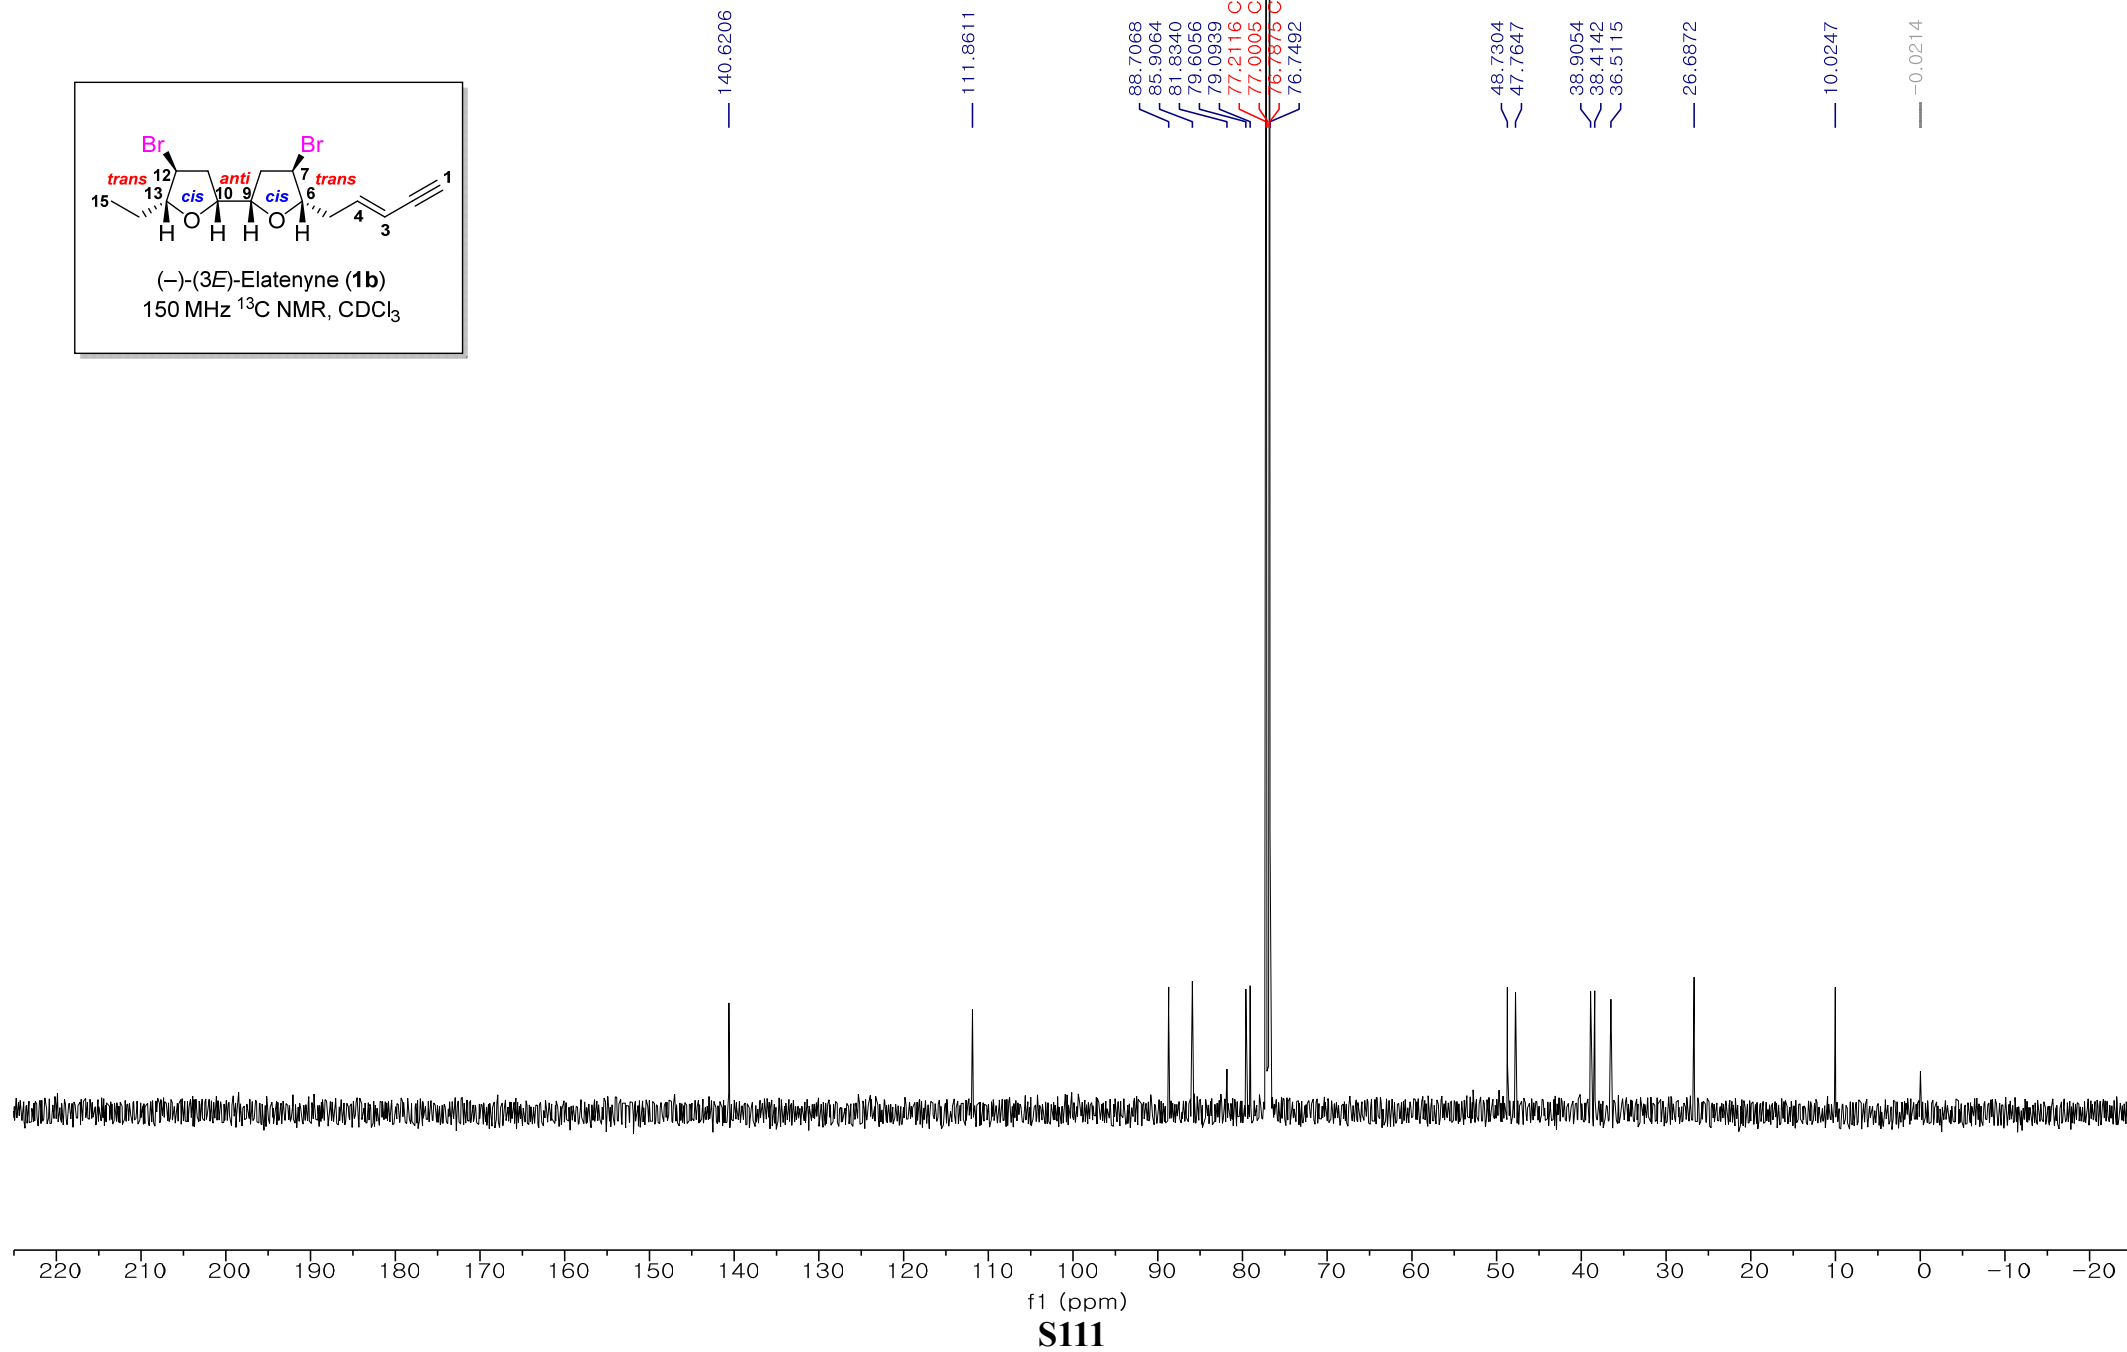

Synthetic *ent*-(*E*)-Elatenyne (*ent*-1b), (500 MHz, CDCl<sub>3</sub>, *J. Am. Chem. Soc.*, 2012, 134, 11781–11790)

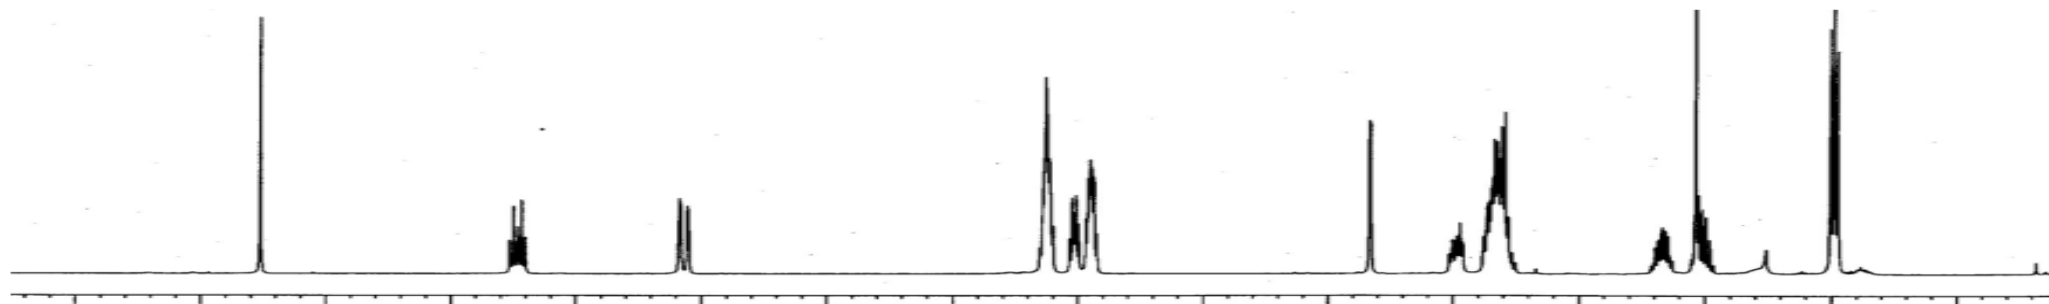

Kim's Synthetic (*3E*)-Elatenyne (1b), (600 MHz, CDCl<sub>3</sub>)

SK-11-106  
single\_pulse

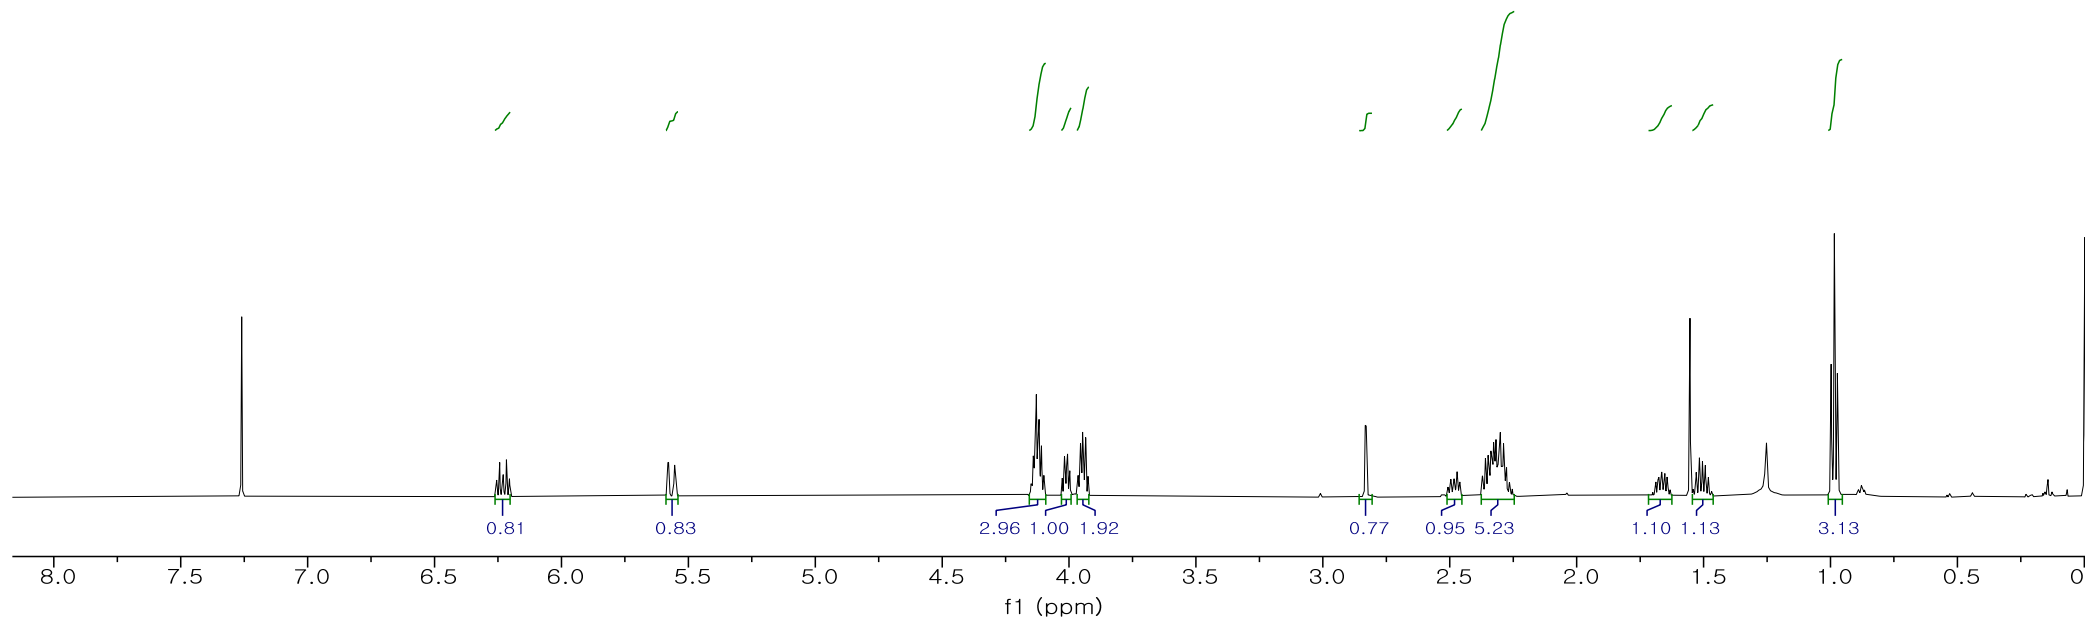



Synthetic *ent*-(*E*)-Elatenyne (*ent*-1b), (500 MHz, CDCl<sub>3</sub>, *J. Am. Chem. Soc.*, 2012, 134, 11781–11790)

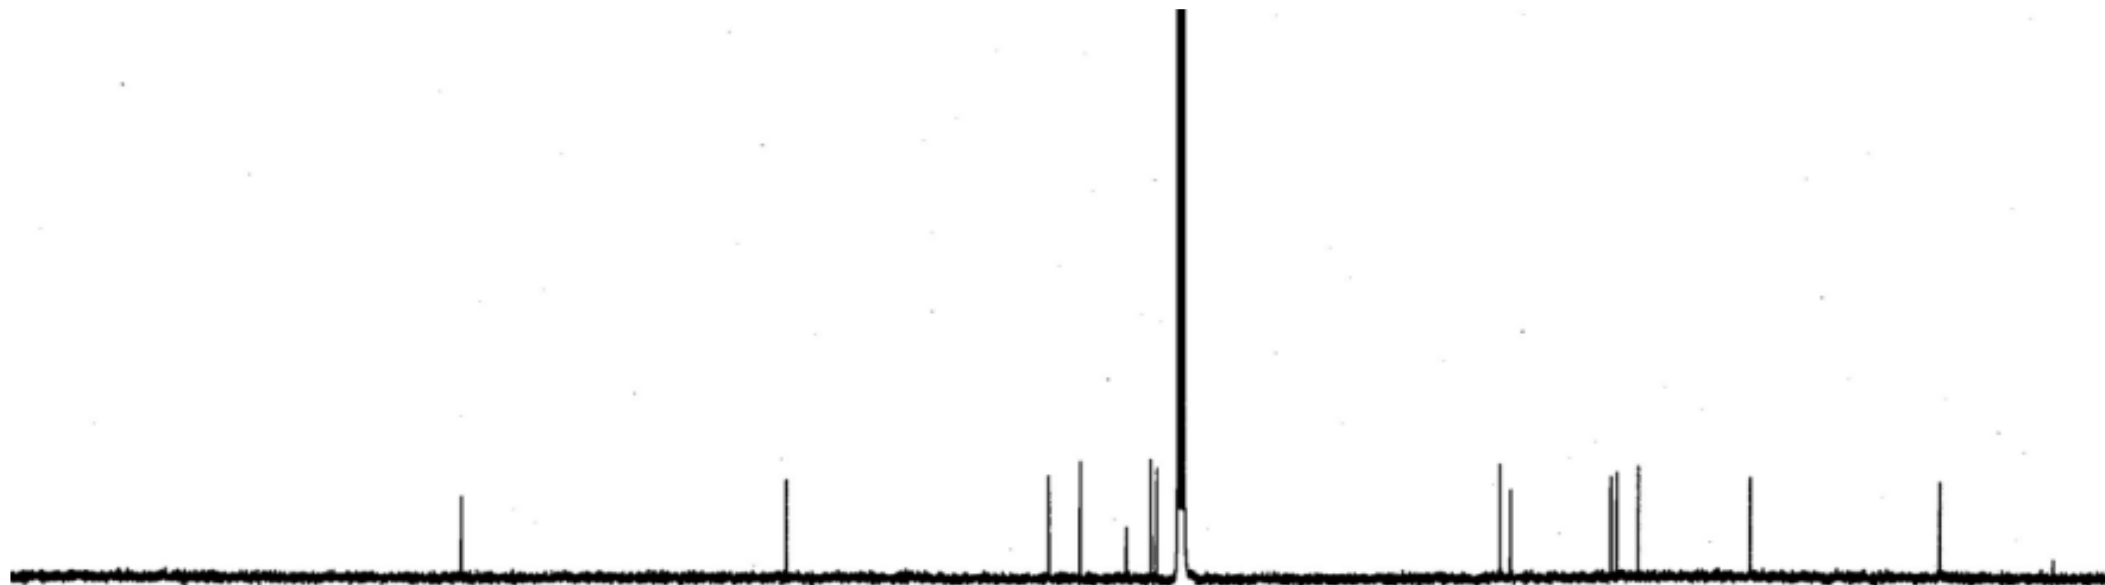

Kim's Synthetic (*3E*)-Elatenyne (1b), (600 MHz, CDCl<sub>3</sub>)

SK-11-106  
single pulse decoupled gated NOE

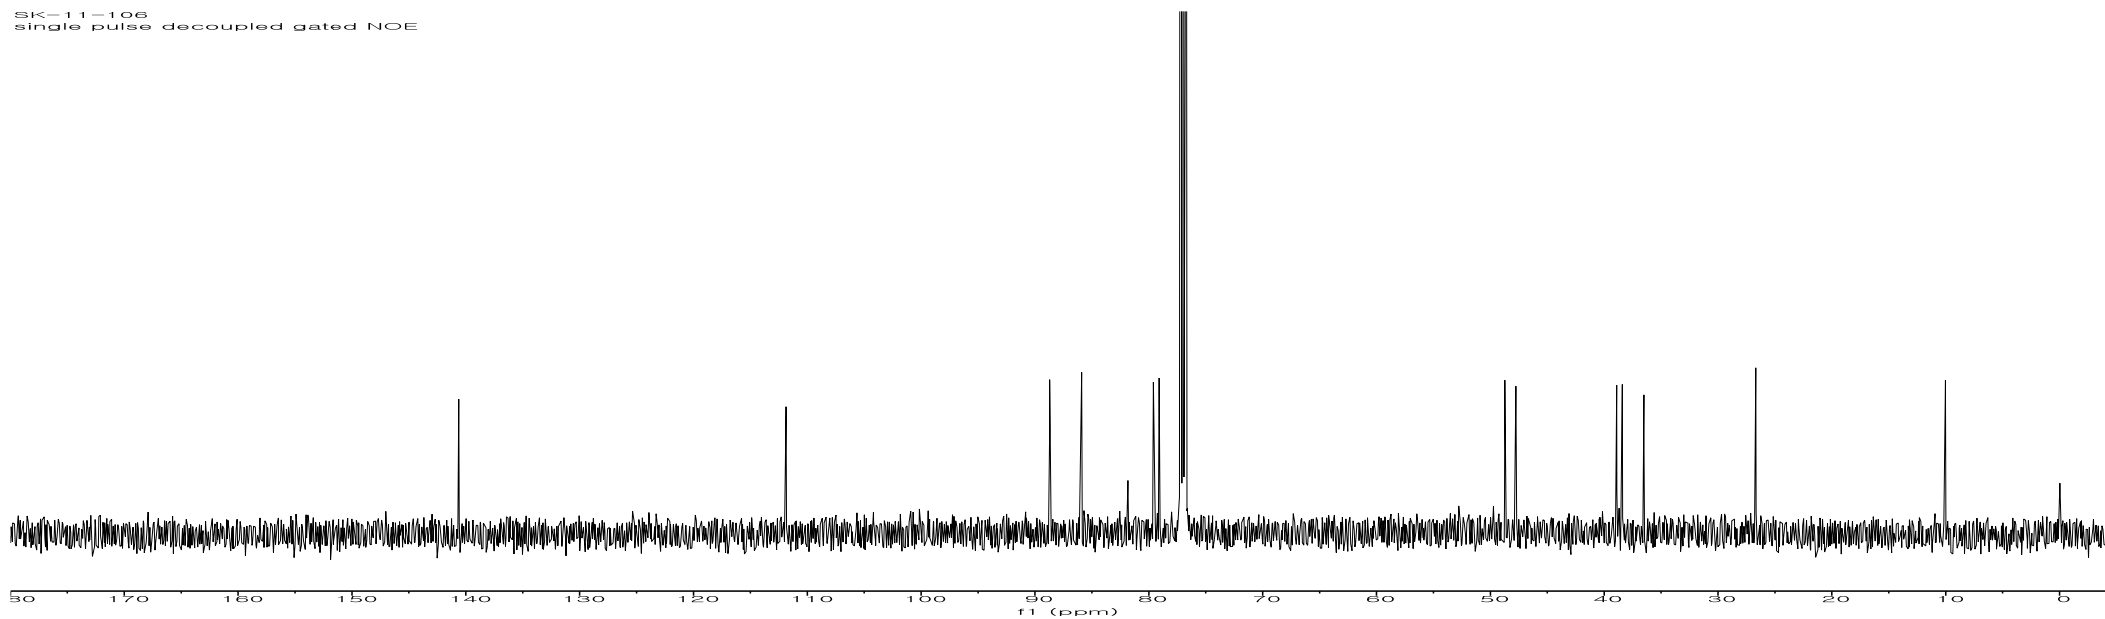

– **Electronic Supplementary Information: Part C** –

**Stereoselective total synthesis of (3*Z*)- and (3*E*)-elatenynes**

Soo Yeon Kwak,<sup>a‡</sup> Iljin Shin,<sup>a‡</sup> Hongjun Jang,<sup>a</sup> Youngjik Park,<sup>a</sup> Seongju Lim,<sup>a</sup> Dongjoo Lee,<sup>a</sup>  
Hyoungsu Kim,<sup>\*a</sup> and Deukjoon Kim<sup>b</sup>

<sup>a</sup>College of Pharmacy and Research Institute of Pharmaceutical Science and Technology (RIPST), Ajou University, Suwon 16499, Korea

<sup>b</sup>The Research Institute of Pharmaceutical Sciences, College of Pharmacy, Seoul National University, Seoul 08826, Korea

<sup>‡</sup>These authors contributed equally to this work.

\* E-mail: [hkimajou@ajou.ac.kr](mailto:hkimajou@ajou.ac.kr)

**Part C (S114 ~ S140)**  
**Copies of HRMS Spectra**

**Copies of Original Reports for HRMS.....S115 ~ S116**

**Copies of Original HRMS Spectra.....S117 ~ S140**

## Copies of Original Reports for HRMS

| Compound                | Mode | Formula                                                        | m/z                | Calculated | Observed | Page |
|-------------------------|------|----------------------------------------------------------------|--------------------|------------|----------|------|
| <b>13</b>               | EI   | C <sub>16</sub> H <sub>23</sub> NO <sub>4</sub>                | [M] <sup>+</sup>   | 293.1627   | 293.1624 | S117 |
| <b>14</b>               | EI   | C <sub>16</sub> H <sub>24</sub> BrNO <sub>4</sub>              | [M] <sup>+</sup>   | 373.0889   | 373.0884 | S118 |
| <b>11</b>               | EI   | C <sub>24</sub> H <sub>32</sub> BrNO <sub>5</sub>              | [M] <sup>+</sup>   | 493.1464   | 493.1462 | S119 |
| <b>10</b>               | EI   | C <sub>24</sub> H <sub>31</sub> NO <sub>5</sub>                | [M] <sup>+</sup>   | 413.2202   | 413.2205 | S120 |
| <b>15</b>               | EI   | C <sub>25</sub> H <sub>44</sub> BrNO <sub>4</sub> Si           | [M] <sup>+</sup>   | 529.2223   | 529.2225 | S121 |
| <b>16</b>               | EI   | C <sub>25</sub> H <sub>43</sub> NO <sub>4</sub> Si             | [M] <sup>+</sup>   | 449.2961   | 449.2961 | S122 |
| <b>SI-A-03</b>          | EI   | C <sub>16</sub> H <sub>23</sub> NO <sub>4</sub>                | [M] <sup>+</sup>   | 293.1627   | 293.1624 | S123 |
| <b>17</b>               | EI   | C <sub>24</sub> H <sub>31</sub> NO <sub>5</sub>                | [M] <sup>+</sup>   | 413.2202   | 413.2202 | S124 |
| <b>9</b>                | EI   | C <sub>25</sub> H <sub>32</sub> O <sub>5</sub>                 | [M] <sup>+</sup>   | 412.2250   | 412.2242 | S125 |
| <b>SI-A-04</b>          | FAB  | C <sub>25</sub> H <sub>33</sub> O <sub>5</sub>                 | [M+H] <sup>+</sup> | 413.2328   | 413.2328 | S126 |
| <b>(S)-MTPA-SI-A-05</b> | FAB  | C <sub>35</sub> H <sub>40</sub> F <sub>3</sub> O <sub>7</sub>  | [M+H] <sup>+</sup> | 629.2726   | 629.2719 | S127 |
| <b>(R)-MTPA-SI-A-06</b> | FAB  | C <sub>35</sub> H <sub>40</sub> F <sub>3</sub> O <sub>7</sub>  | [M+H] <sup>+</sup> | 629.2726   | 629.2722 | S128 |
| <b>20</b>               | EI   | C <sub>27</sub> H <sub>36</sub> O <sub>5</sub>                 | [M] <sup>+</sup>   | 440.2563   | 440.2558 | S129 |
| <b>SI-A-07</b>          | EI   | C <sub>34</sub> H <sub>42</sub> O <sub>7</sub> S               | [M] <sup>+</sup>   | 594.2651   | 594.2654 | S130 |
| <b>8</b>                | FAB  | C <sub>34</sub> H <sub>45</sub> O <sub>9</sub> S               | [M+H] <sup>+</sup> | 629.2784   | 629.2787 | S131 |
| <b>21</b>               | EI   | C <sub>27</sub> H <sub>36</sub> O <sub>6</sub>                 | [M] <sup>+</sup>   | 456.2512   | 456.2510 | S132 |
| <b>SI-A-09</b>          | EI   | C <sub>27</sub> H <sub>35</sub> BrO <sub>5</sub>               | [M] <sup>+</sup>   | 518.1668   | 518.1669 | S133 |
| <b>SI-A-10</b>          | EI   | C <sub>19</sub> H <sub>27</sub> BrO <sub>4</sub>               | [M] <sup>+</sup>   | 398.1093   | 398.1094 | S134 |
| <b>6</b>                | EI   | C <sub>19</sub> H <sub>26</sub> Br <sub>2</sub> O <sub>3</sub> | [M] <sup>+</sup>   | 460.0249   | 460.0243 | S135 |
| <b>7</b>                | FAB  | C <sub>19</sub> H <sub>29</sub> O <sub>5</sub>                 | [M+H] <sup>+</sup> | 337.2015   | 337.2017 | S136 |
| <b>SI-A-13</b>          | FAB  | C <sub>12</sub> H <sub>21</sub> Br <sub>2</sub> O <sub>3</sub> | [M+H] <sup>+</sup> | 370.9857   | 370.9854 | S137 |

## Copies of Original Reports for HRMS

| Compound                   | Mode | Formula                                                           | m/z              | Calculated | Observed | Page |
|----------------------------|------|-------------------------------------------------------------------|------------------|------------|----------|------|
| <b>SI-A-14</b>             | EI   | C <sub>18</sub> H <sub>28</sub> Br <sub>2</sub> O <sub>2</sub> Si | [M] <sup>+</sup> | 462.0225   | 462.0219 | S138 |
| <b>(3Z)-Elatenyne (1a)</b> | EI   | C <sub>15</sub> H <sub>20</sub> Br <sub>2</sub> O <sub>2</sub>    | [M] <sup>+</sup> | 389.9830   | 389.9825 | S139 |
| <b>(3E)-Elatenyne (1a)</b> | EI   | C <sub>15</sub> H <sub>20</sub> Br <sub>2</sub> O <sub>2</sub>    | [M] <sup>+</sup> | 389.9830   | 389.9834 | S140 |

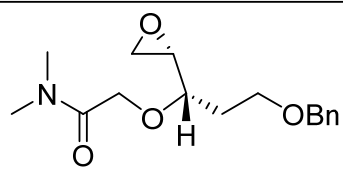

13

Chemical Formula: C<sub>16</sub>H<sub>23</sub>NO<sub>4</sub>

Exact Mass: 293.1627

[M]<sup>+</sup> Calcd for C<sub>16</sub>H<sub>23</sub>NO<sub>4</sub> 293.1627

[ Elemental Composition ]

Data : 1-SK-01-001

Date : 10-Oct-2023 15:52

Sample:

Note : SMLab Mass analysis (Jeol HRMS JMS-700D)

Inlet : Direct

Ion Mode : EI+

RT : 1.77 min

Scan#: 54+58

Elements : C 18/0, H 25/0, O 4/0, N 2/0

Mass Tolerance : 3mmu

Unsaturation (U.S.) : -0.5 - 70.0

| Observed m/z | Int%  | Err [ppm / mmu] | U.S. | Composition     |
|--------------|-------|-----------------|------|-----------------|
| 293.1624     | 100.0 | -1.1 / -0.3     | 6.0  | C 16 H 23 O 4 N |

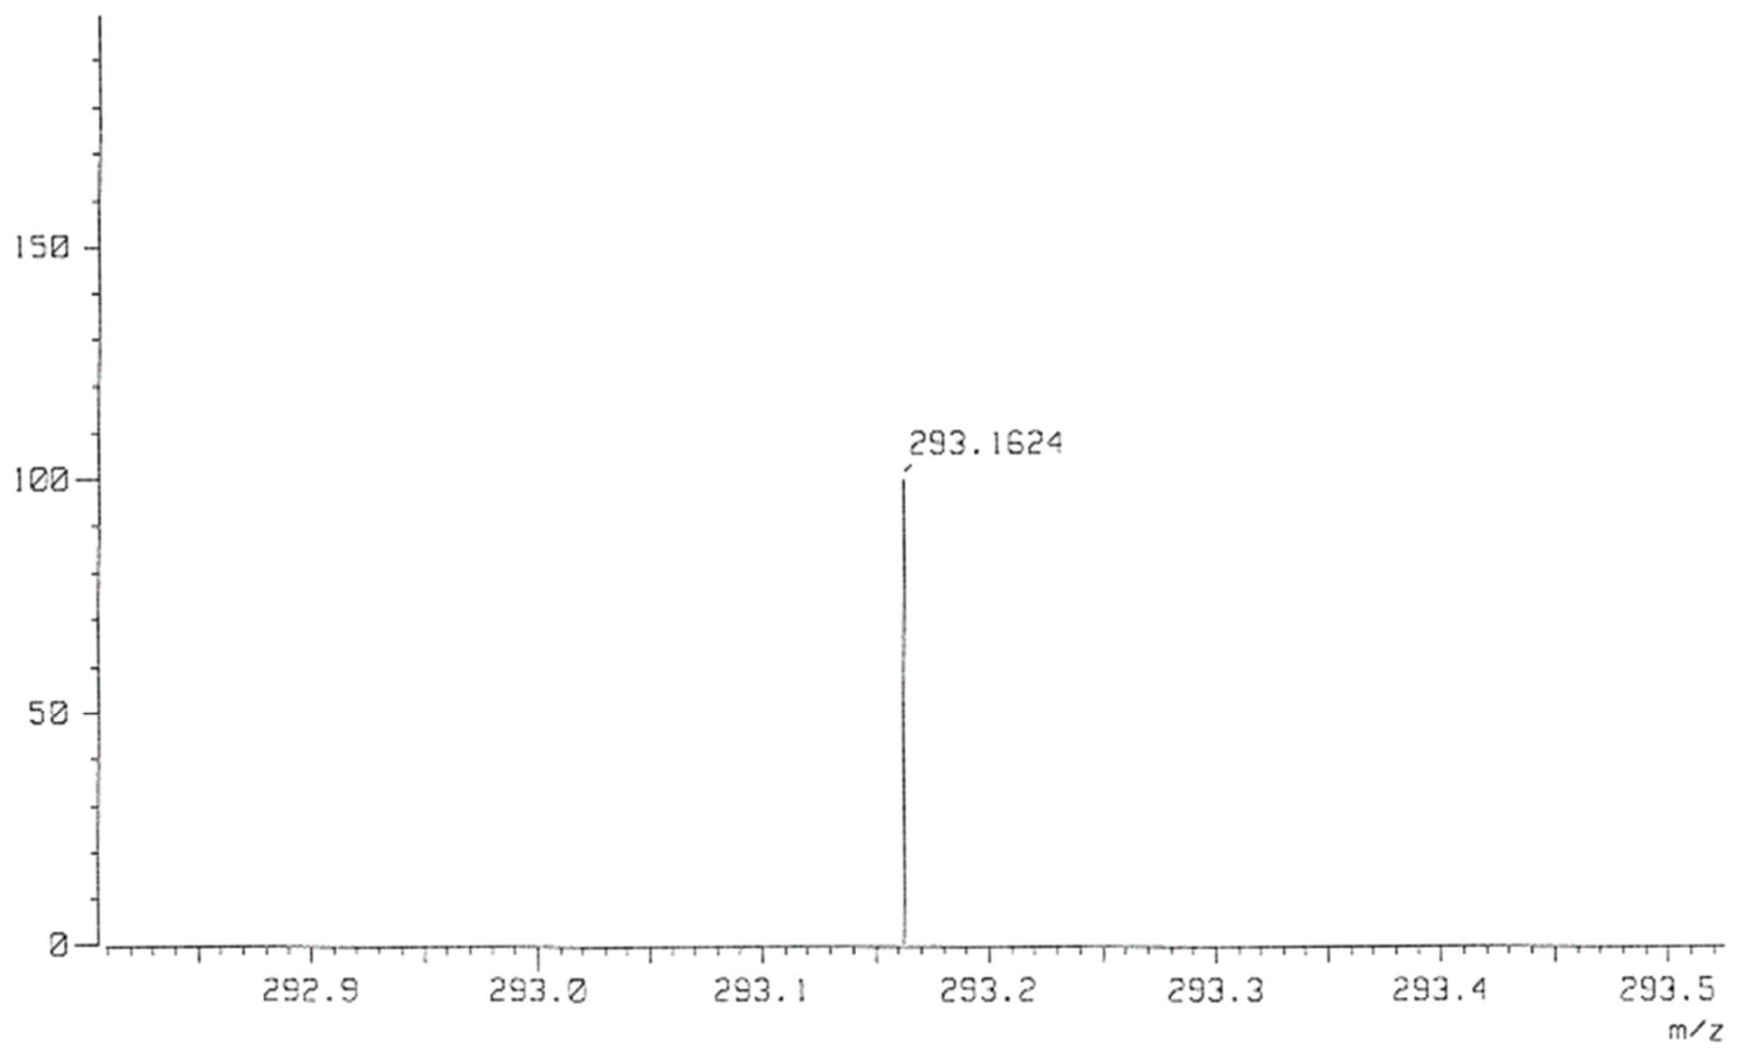

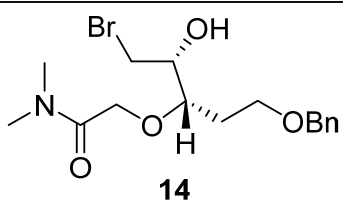

**14**

Chemical Formula: C<sub>16</sub>H<sub>24</sub>BrNO<sub>4</sub>

Exact Mass: 373.0889

**[M]<sup>+</sup> Calcd for C<sub>16</sub>H<sub>24</sub>BrNO<sub>4</sub> 373.0889**

[ Elemental Composition ]

Data : 2-SK-02-001

Date : 10-Oct-2023 16:03

Sample:

Note : SMLab Mass analysis (Jeol HRMS JMS-700D)

Inlet : Direct

Ion Mode : EI+

RT : 1.75 min

Scan#: (53,54)+62+66+70

Elements : C 18/0, H 25/0, O 4/0, N 2/0, Br 1/0

Mass Tolerance : 3mmu

Unsaturation (U.S.) : -0.5 - 70.0

| Observed m/z | Int% | Err [ppm / mmu] | U.S. | Composition        |
|--------------|------|-----------------|------|--------------------|
| 373.0884     | 99.4 | -1.2 / -0.5     | 5.0  | C 16 H 24 O 4 N Br |

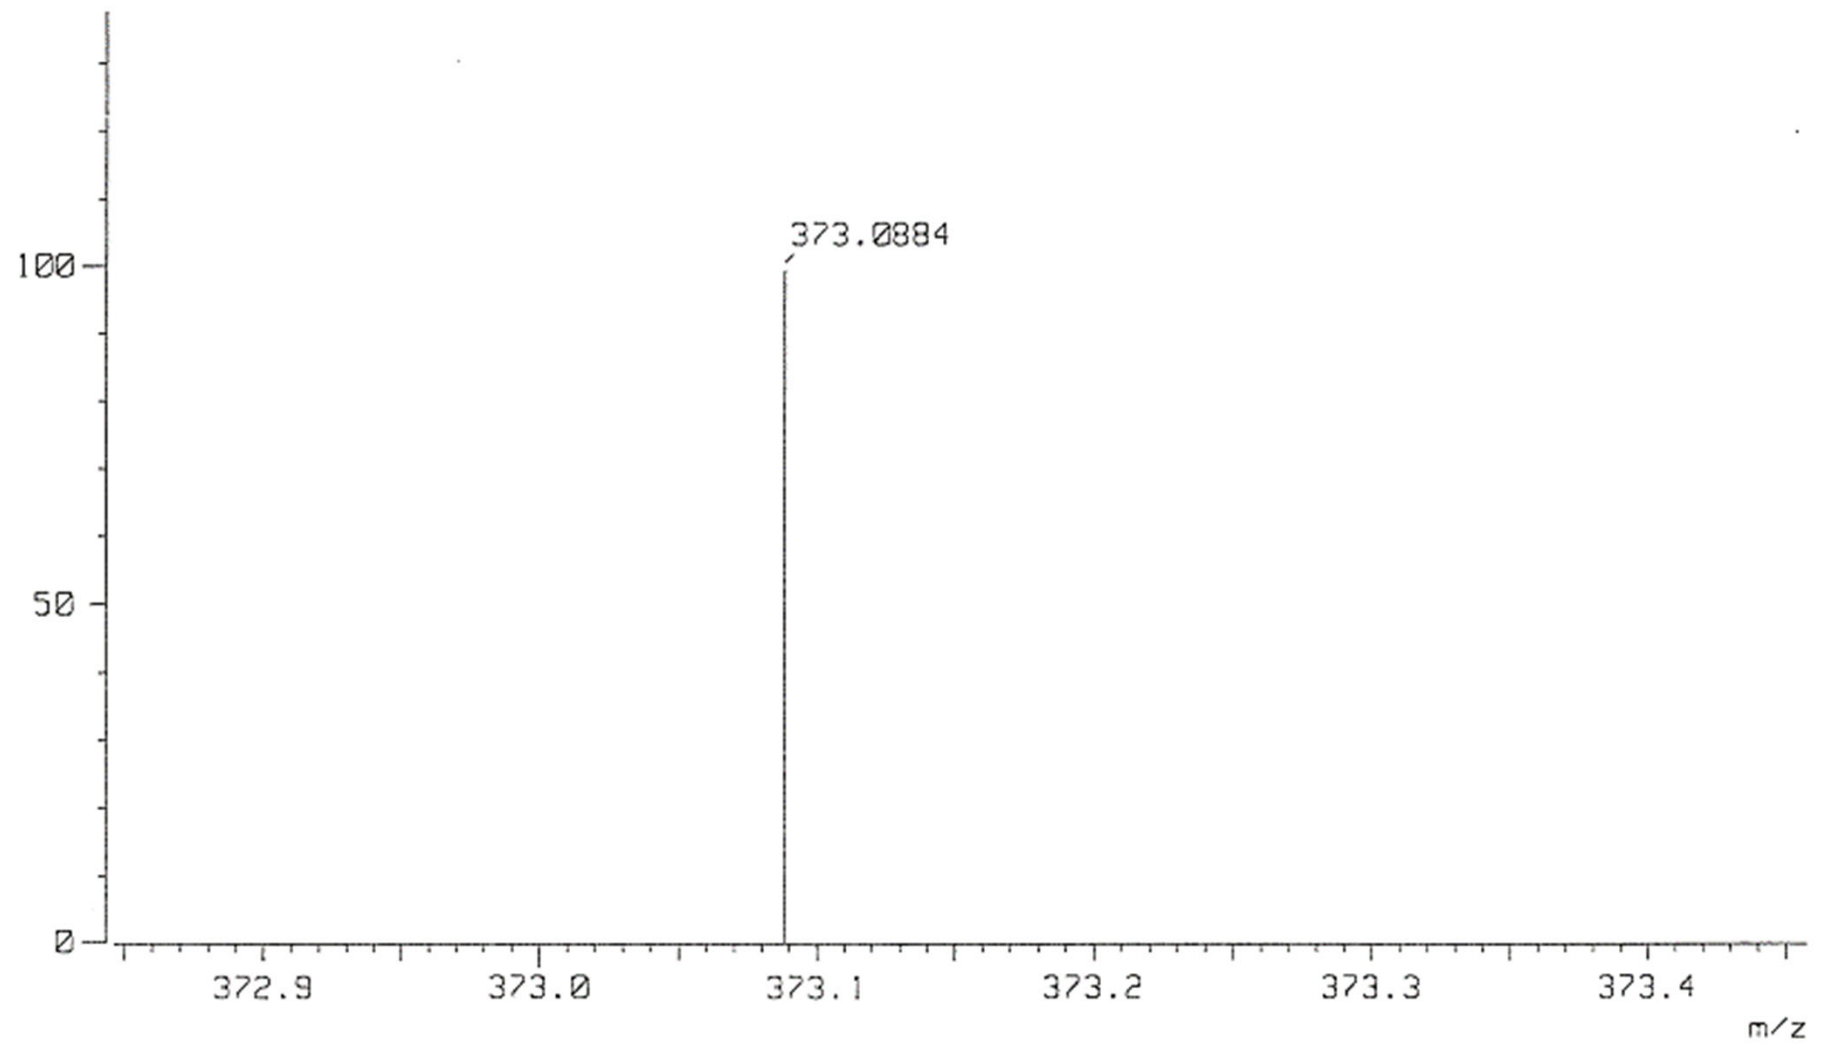

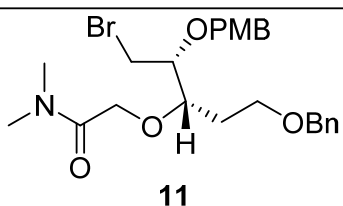

Chemical Formula: C<sub>24</sub>H<sub>32</sub>BrNO<sub>5</sub>

Exact Mass: 493.1464

**[M]<sup>+</sup> Calcd for C<sub>24</sub>H<sub>32</sub>BrNO<sub>5</sub> 493.1464**

[ Elemental Composition ]

Data : 3-SK-03-010

Date : 10-Oct-2023 16:17

Sample:

Note : SMLab Mass analysis (Jeol HRMS JMS-700D)

Inlet : Direct

Ion Mode : EI+

RT : 2.57 min

Scan#: 78

Elements : C 25/0, H 35/0, O 5/0, N 2/0, Br 1/0

Mass Tolerance : 3mmu

Unsaturation (U.S.) : -0.5 - 70.0

| Observed m/z | Int% | Err [ppm / mmu] | U.S. | Composition        |
|--------------|------|-----------------|------|--------------------|
| 493.1462     | 98.1 | -0.4 / -0.2     | 9.0  | C 24 H 32 O 5 N Br |

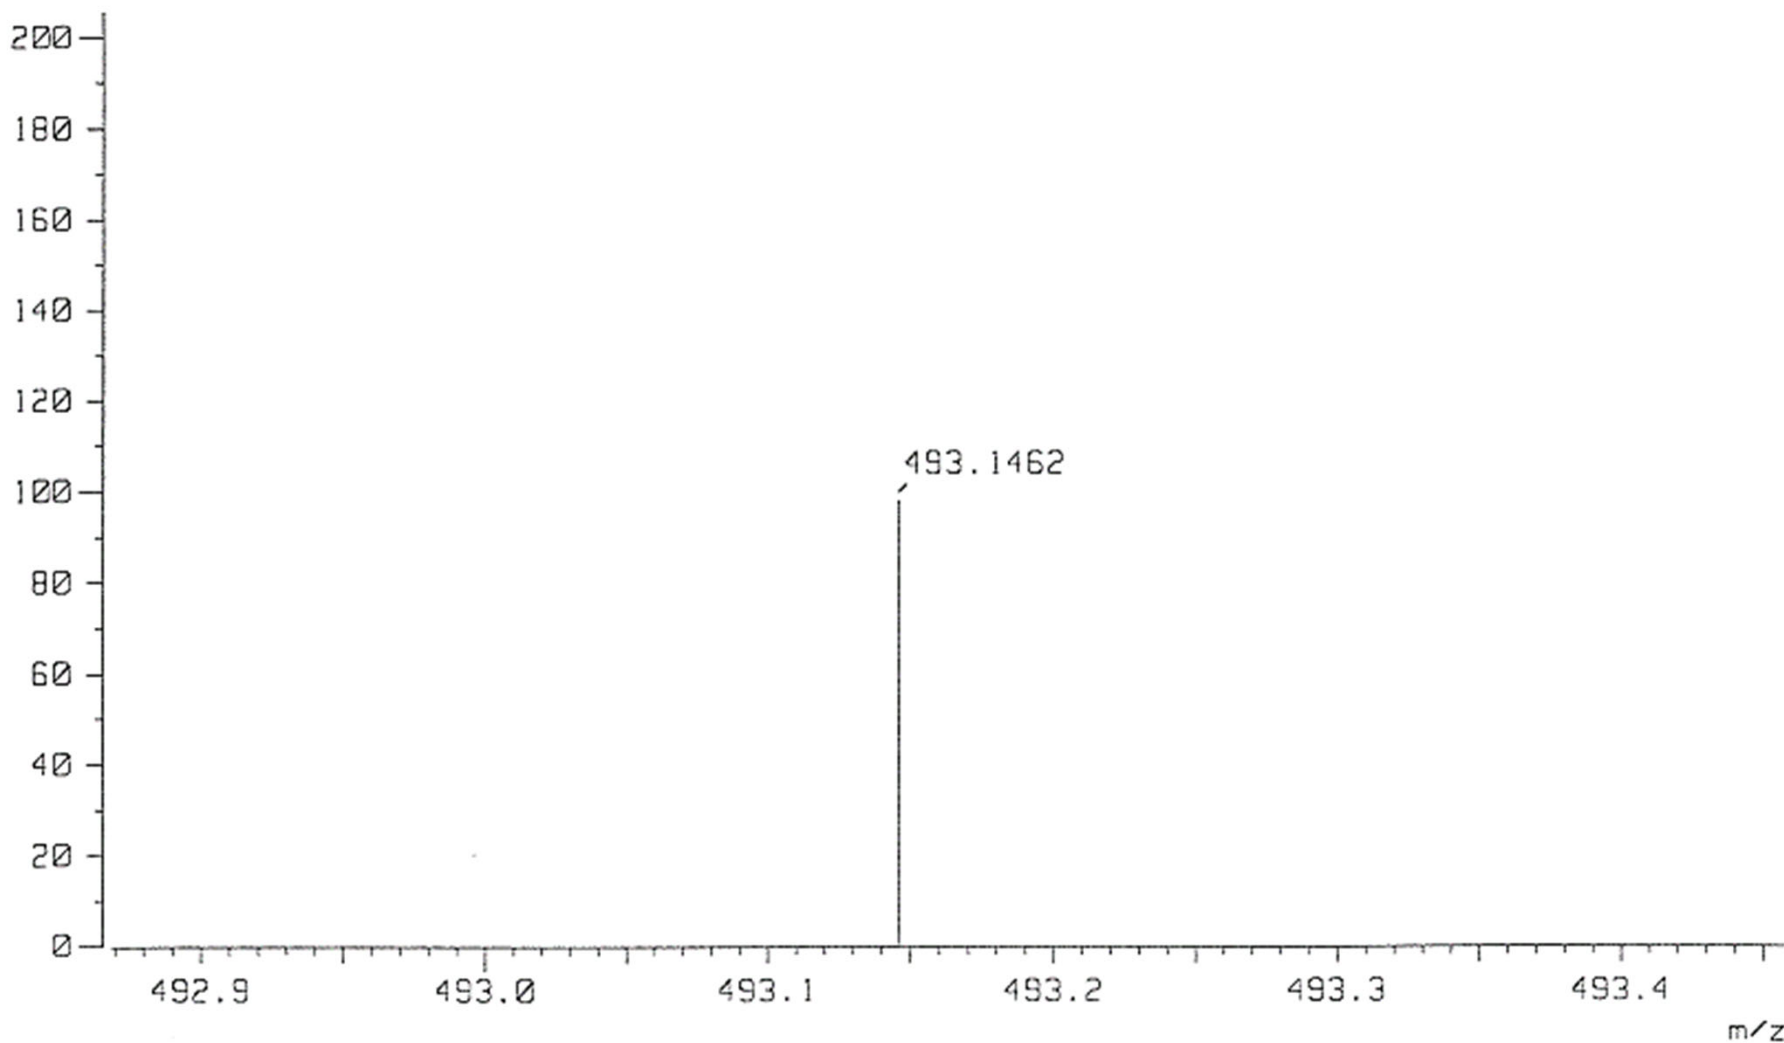

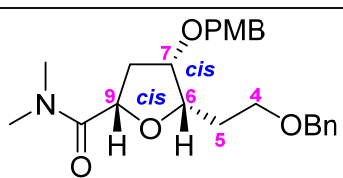

**10**

Chemical Formula: C<sub>24</sub>H<sub>31</sub>NO<sub>5</sub>

Exact Mass: 413.2202

**[M]<sup>+</sup> Calcd for C<sub>24</sub>H<sub>31</sub>NO<sub>5</sub> 413.2202**

[ Elemental Composition ]

Data : 4-SK-04-012

Date : 10-Oct-2023 16:23

Sample:

Note : SMLab Mass analysis (Jeol HRMS JMS-700D)

Inlet : Direct

Ion Mode : EI+

RT : 1.87 min

Scan#: (56,58)+62+65

Elements : C 25/0, H 32/0, O 6/0, N 2/0

Mass Tolerance : 3mmu

Unsaturation (U.S.) : -0.5 - 70.0

| Observed m/z | Int% | Err [ppm / mmu] | U.S. Composition     |
|--------------|------|-----------------|----------------------|
| 413.2205     | 60.7 | +0.6 / +0.2     | 10.0 C 24 H 31 O 5 N |

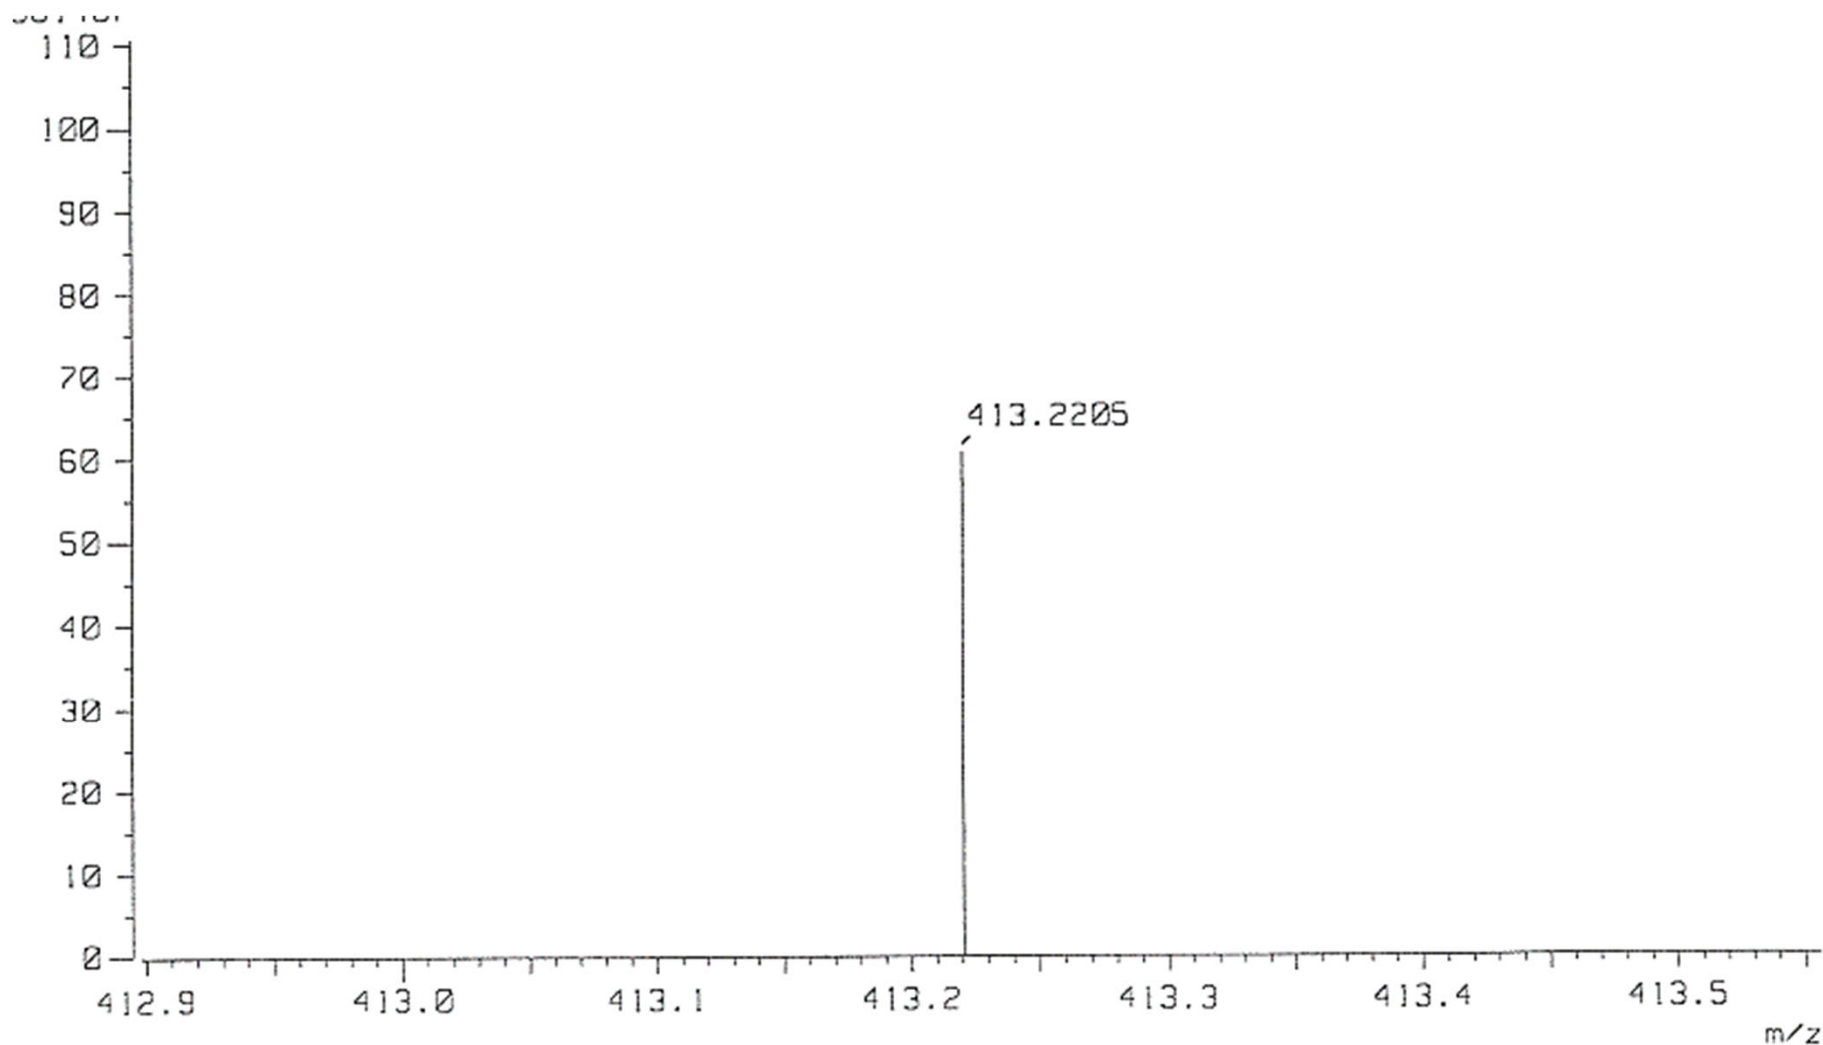



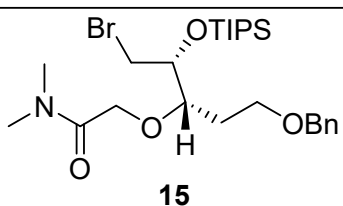

Chemical Formula: C<sub>25</sub>H<sub>44</sub>BrNO<sub>4</sub>Si

Exact Mass: 529.2223

**[M]<sup>+</sup> Calcd for C<sub>25</sub>H<sub>44</sub>BrNO<sub>4</sub>Si 529.2223**

[ Elemental Composition ]

Data : 5-SK-05-016

Date : 10-Oct-2023 16:32

Sample:

Note : SMLab Mass analysis (Jeol HRMS JMS-700D)

Inlet : Direct

Ion Mode : EI+

RT : 0.54 min

Scan#: 17+19

Elements : C 26/0, H 45/0, O 5/0, N 2/0, Br 1/0, Si 1/0

Mass Tolerance : 3mmu

Unsaturation (U.S.) : -0.5 - 70.0

| Observed m/z | Int% | Err [ppm / mmu] | U.S. | Composition           |
|--------------|------|-----------------|------|-----------------------|
| 529.2225     | 29.2 | +0.4 / +0.2     | 5.0  | C 25 H 44 O 4 N Br Si |

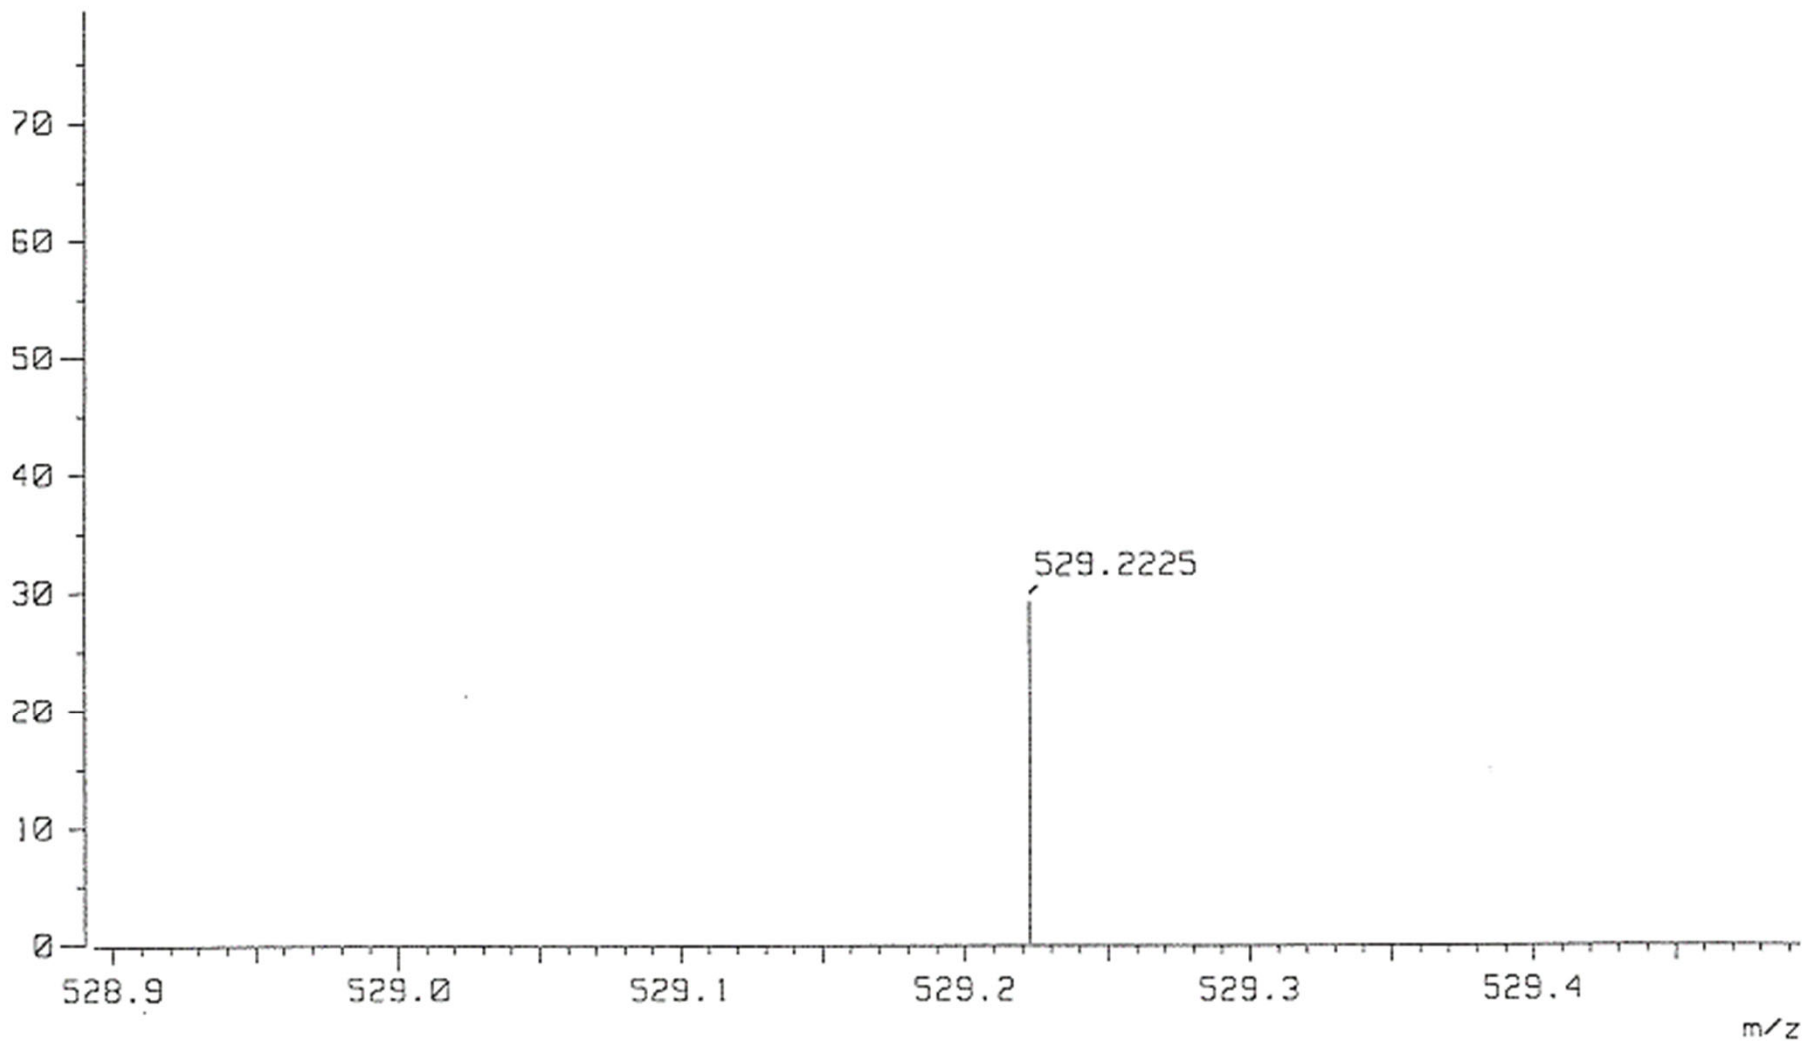

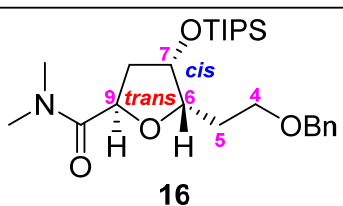

Chemical Formula: C<sub>25</sub>H<sub>43</sub>NO<sub>4</sub>Si

Exact Mass: 449.2961

**[M]<sup>+</sup> Calcd for C<sub>25</sub>H<sub>43</sub>NO<sub>4</sub>Si 449.2961**

[ Elemental Composition ]

Data : 6-SK-06-018

Date : 10-Oct-2023 16:36

Sample:

Note : SMLab Mass analysis (Jeol HRMS JMS-700D)

Inlet : Direct

Ion Mode : EI+

RT : 1.44 min

Scan#: 44+44+46+47

Elements : C 27/0, H 45/0, O 4/0, N 2/0, Si 1/0

Mass Tolerance : 3mmu

Unsaturation (U.S.) : -0.5 - 70.0

| Observed m/z | Int% | Err [ppm / mmu] | U.S. | Composition        |
|--------------|------|-----------------|------|--------------------|
| 449.2961     | 23.5 | -0.1 / +0.0     | 6.0  | C 25 H 43 O 4 N Si |

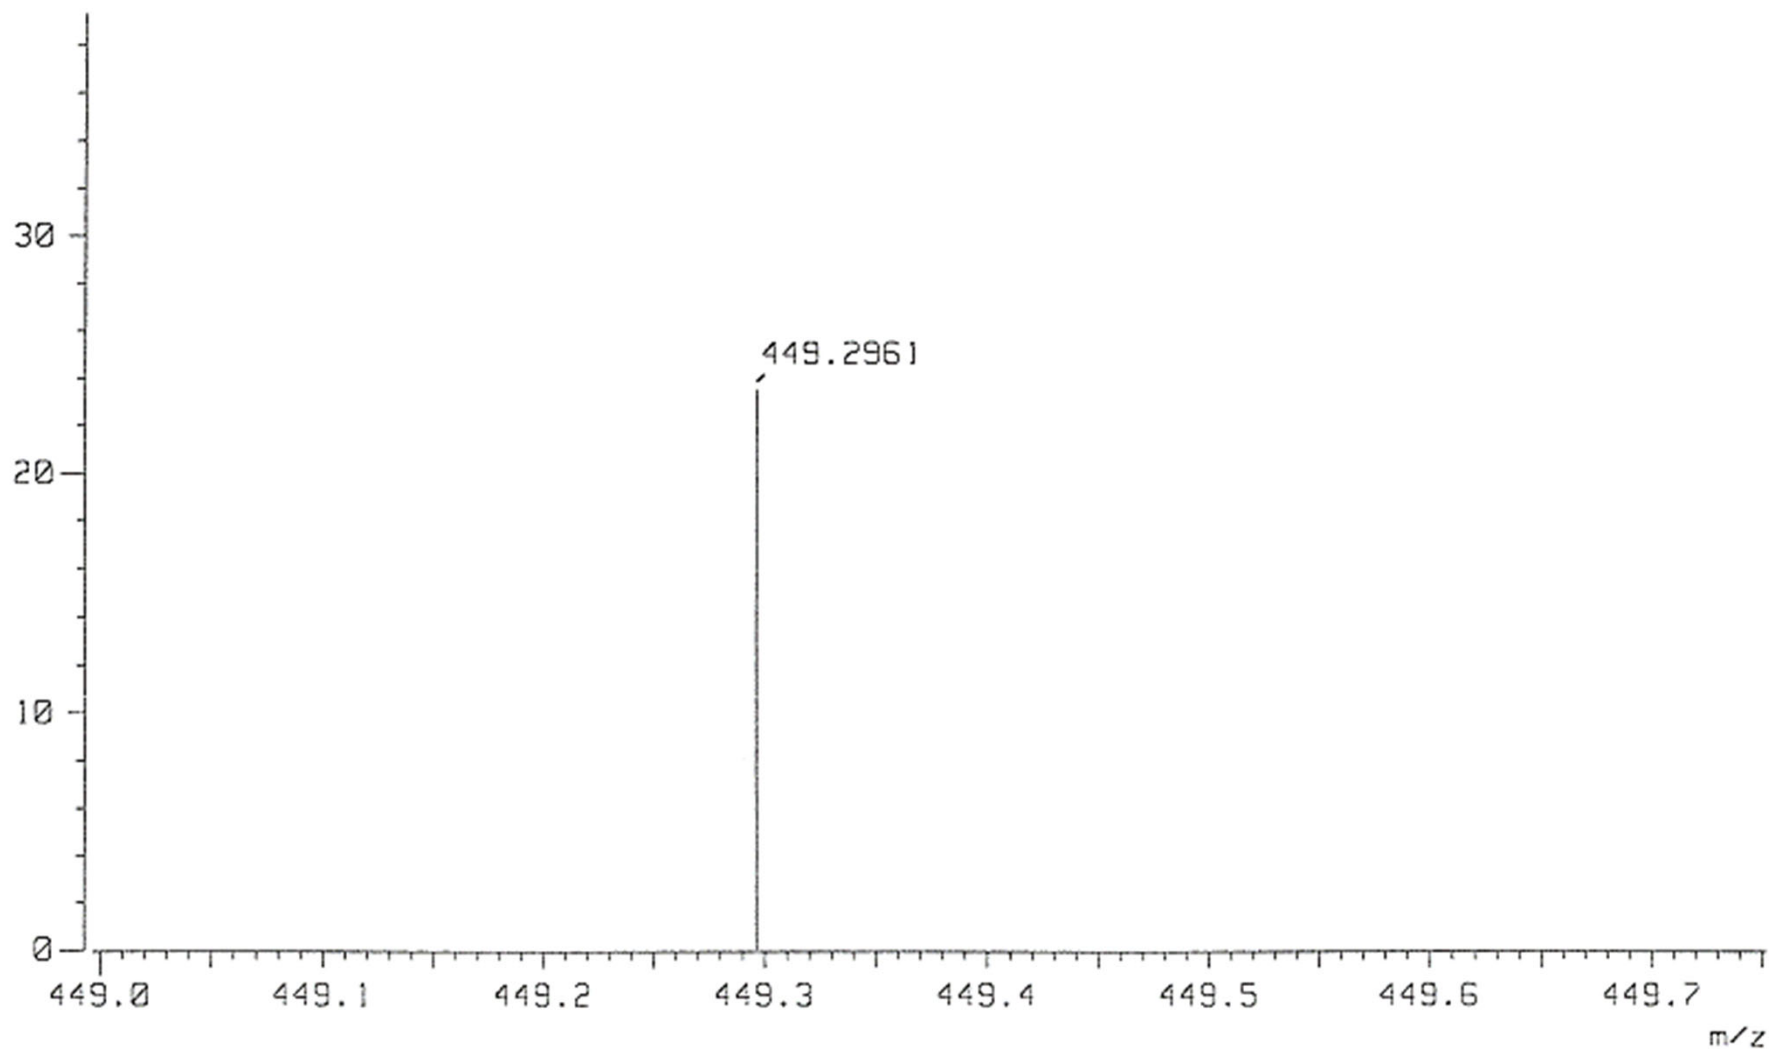

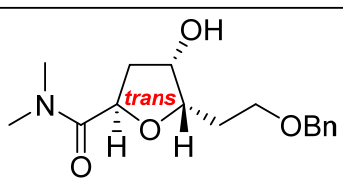

**SI-A-03**

Chemical Formula: C<sub>16</sub>H<sub>23</sub>NO<sub>4</sub>

Exact Mass: 293.1627

**[M]<sup>+</sup> Calcd for C<sub>16</sub>H<sub>23</sub>NO<sub>4</sub> 293.1627**

[ Elemental Composition ]

Data : 7-SK-07-003

Date : 10-Oct-2023 15:57

Sample:

Note : SMLab Mass analysis (Jeol HRMS JMS-700D)

Inlet : Direct

Ion Mode : EI+

RT : 2.52 min

Scan#: (75,78)+68+64+70+71+72+74

Elements : C 20/0, H 25/0, O 4/0, N 2/0

Mass Tolerance : 3mmu

Unsaturation (U.S.) : -0.5 - 70.0

| Observed m/z | Int% | Err [ppm / mmu] | U.S. Composition    |
|--------------|------|-----------------|---------------------|
| 293.1624     | 56.9 | -1.2 / -0.4     | 6.0 C 16 H 23 O 4 N |

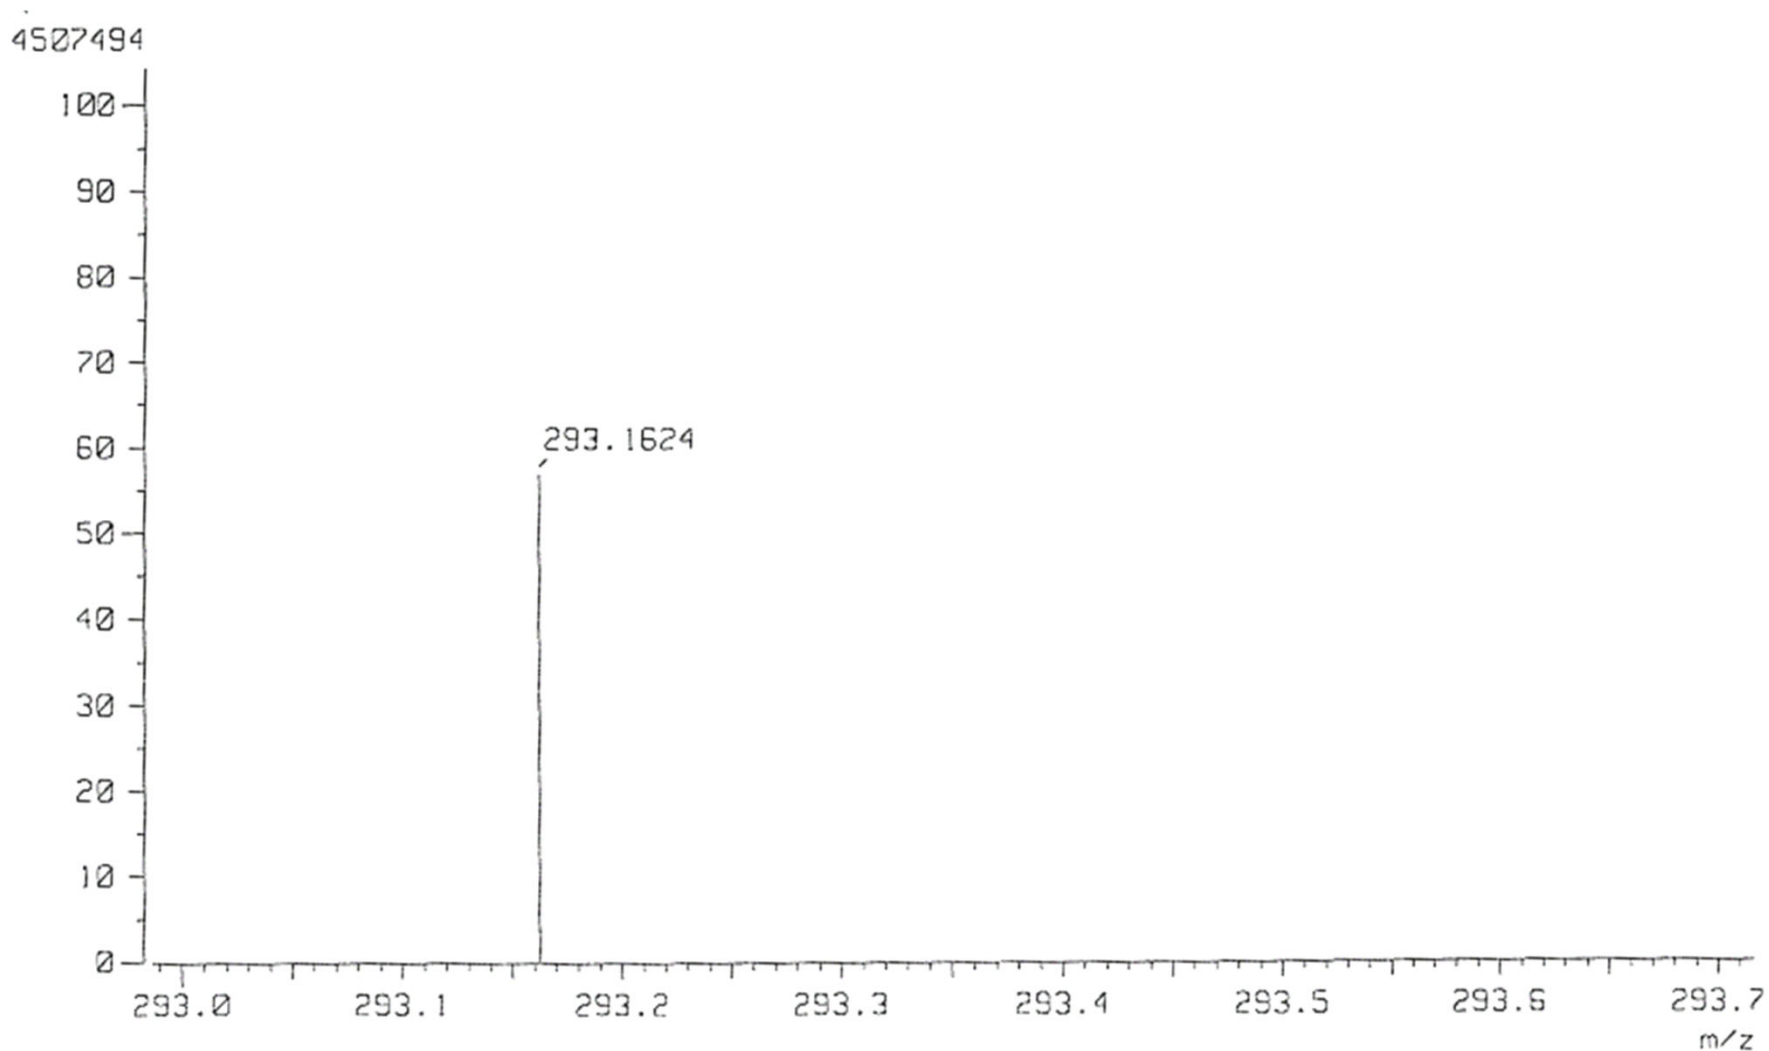

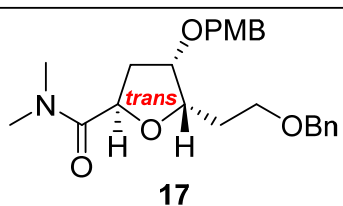

17

Chemical Formula: C<sub>24</sub>H<sub>31</sub>NO<sub>5</sub>

Exact Mass: 413.2202

[M]<sup>+</sup> Calcd for C<sub>24</sub>H<sub>31</sub>NO<sub>5</sub> 413.2202

[ Elemental Composition ]

Data : 8-SK-08-014

Date : 10-Oct-2023 16:28

Sample:

Note : SMLab Mass analysis (Jeol HRMS JMS-700D)

Inlet : Direct

Ion Mode : EI+

RT : 1.60 min

Scan#: 49+51+49

Elements : C 25/0, H 33/0, O 5/0, N 2/0

Mass Tolerance : 3mmu

Unsaturation (U.S.) : -0.5 - 70.0

| Observed m/z | Int%  | Err [ppm / mmu] | U.S. | Composition     |
|--------------|-------|-----------------|------|-----------------|
| 413.2202     | 100.0 | +0.0 / +0.0     | 10.0 | C 24 H 31 O 5 N |

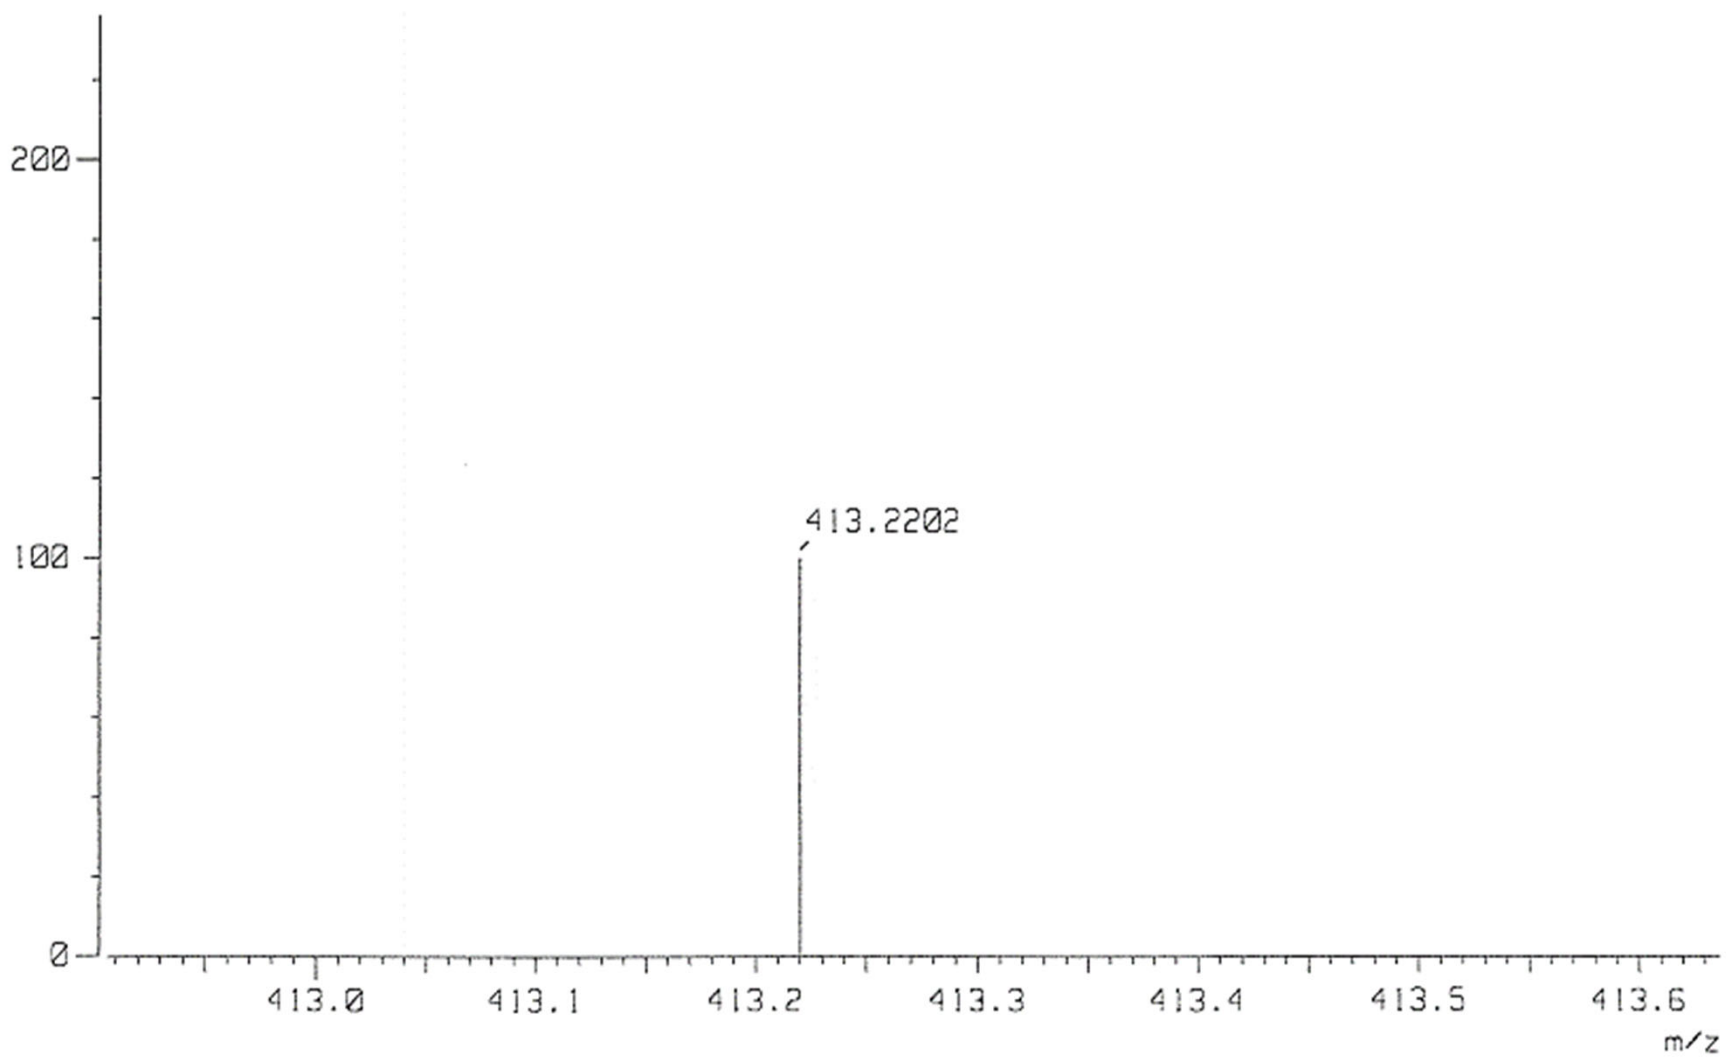

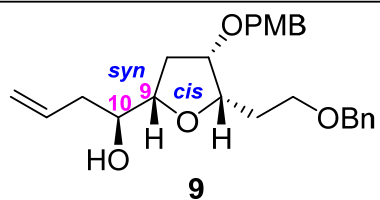

9

Chemical Formula: C<sub>25</sub>H<sub>32</sub>O<sub>5</sub>

Exact Mass: 412.2250

[M]<sup>+</sup> Calcd for C<sub>25</sub>H<sub>32</sub>NO<sub>5</sub> 412.2228

[ Elemental Composition ]

Data : SK-24-013

Date : 20-Dec-2019 16:20

Sample: Ajou-Univ.

Note : SM Lab Research institute for Analysis

Inlet : Reserv.

Ion Mode : EI+

RT : 1.17 min

Scan#: 36+32

Elements : C 25/0, H 45/0, O 6/0

Mass Tolerance : 10mmu

Unsaturation (U.S.) : -1.0 - 50.0

| Observed m/z | Int% | Err [ppm / mmu] | U.S. Composition   |
|--------------|------|-----------------|--------------------|
| 412.2242     | 23.7 | -2.0 / -0.8     | 10.0 C 25 H 32 O 5 |

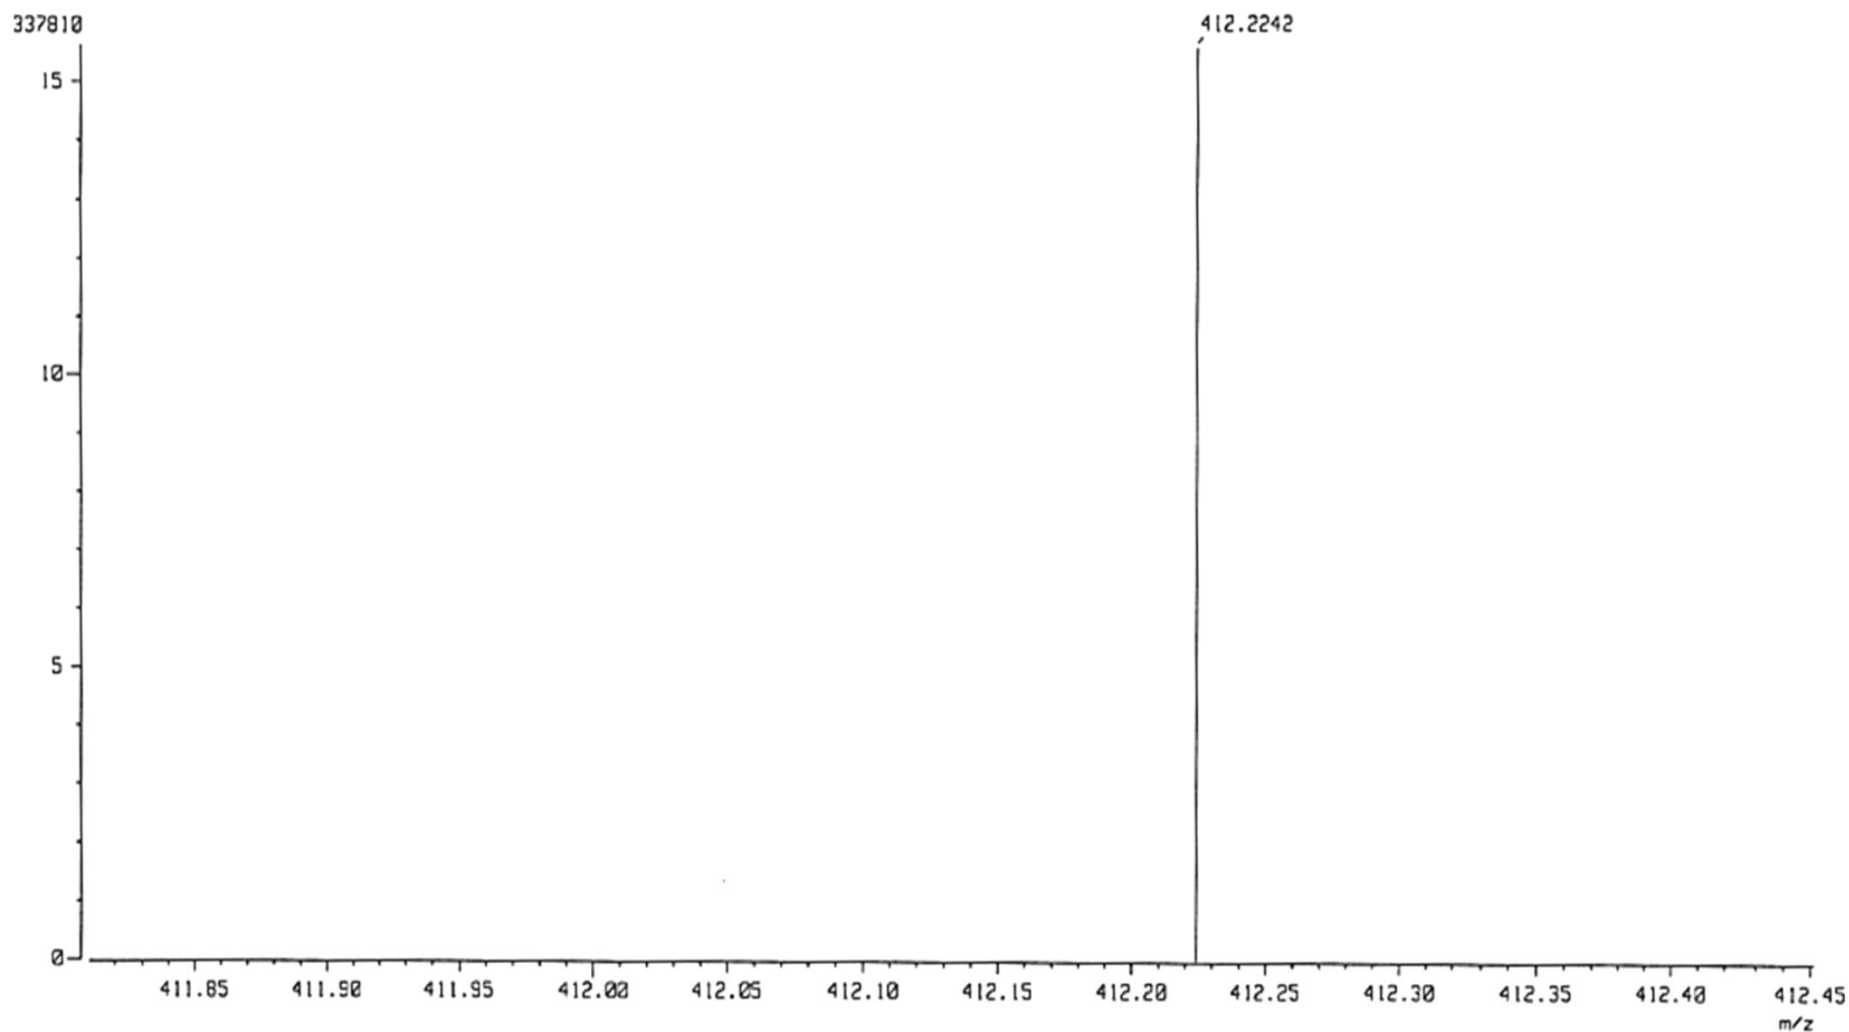

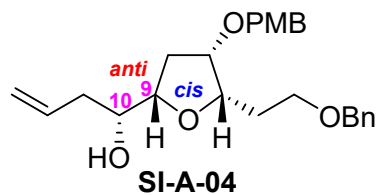

Chemical Formula: C<sub>25</sub>H<sub>32</sub>O<sub>5</sub>

Exact Mass: 412.2250

**[M+H]<sup>+</sup> Calcd for C<sub>25</sub>H<sub>33</sub>NO<sub>5</sub> 413.2328**

[ Elemental Composition ]

Data : FAB-SK-11-011

Date : 11-Oct-2023 14:55

Sample:

Note : SM Lab Research Center (Jeol JMS-700)

Inlet : Reserv.

Ion Mode : FAB+

RT : 1.04 min

Scan#: 32+18+8

Elements : C 27/0, H 37/0, O 7/0

Mass Tolerance : 5mmu

Unsaturation (U.S.) : -0.5 - 80.0

| Observed m/z | Int%  | Err [ppm / mmu] | U.S. | Composition   |
|--------------|-------|-----------------|------|---------------|
| 413.2328     | 100.0 | +0.0 / +0.0     | 9.5  | C 25 H 33 O 5 |

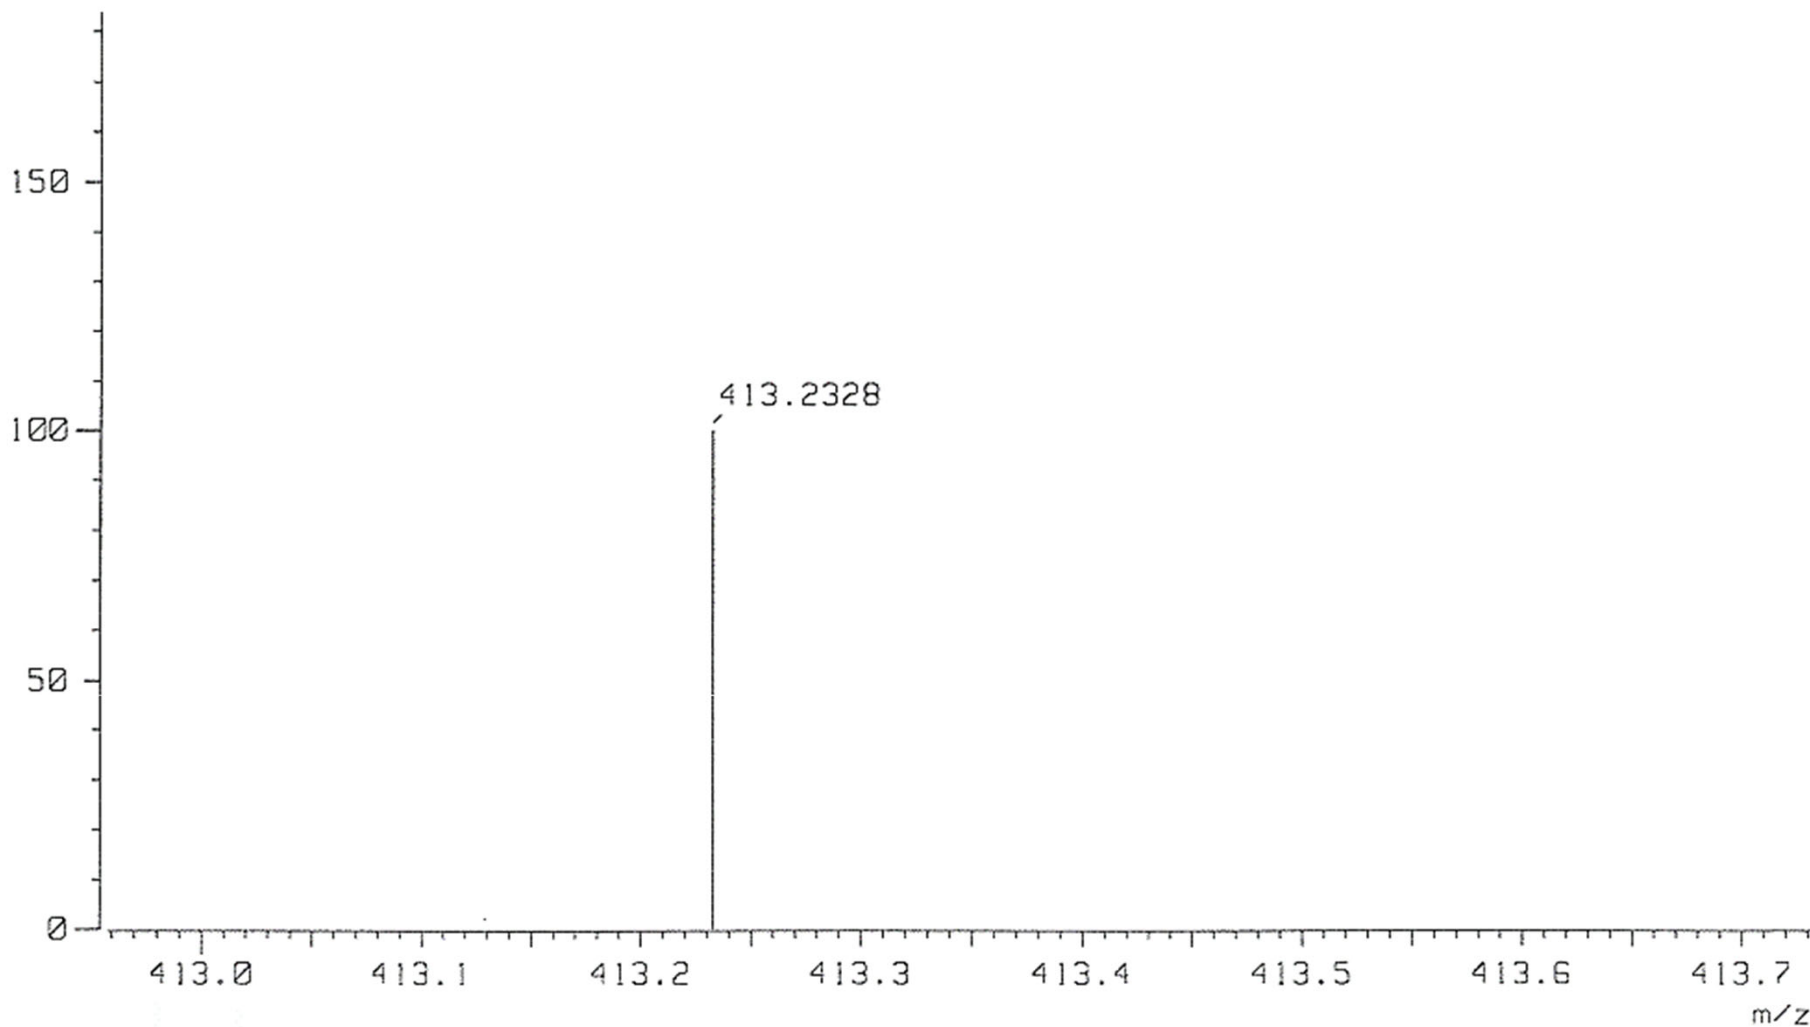

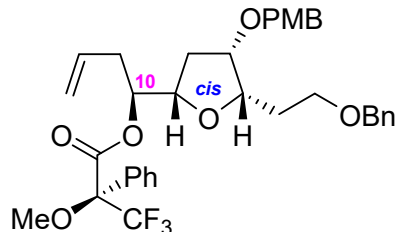

**SI-A-(S)-MTPA-05**

Chemical Formula: C<sub>35</sub>H<sub>39</sub>F<sub>3</sub>O<sub>7</sub>

Exact Mass: 628.2648

**[M+H]<sup>+</sup> Calcd for C<sub>35</sub>H<sub>40</sub>F<sub>3</sub>O<sub>7</sub> 629.2726**

[ Elemental Composition ]

Data : FAB-SK-09-003

Date : 11-Oct-2023 12:20

Sample:

Note : SM Lab Research Center (Jeol JMS-700)

Inlet : Reserv.

Ion Mode : FAB+

RT : 0.44 min

Scan#: (11,17)+24+18+18

Elements : C 37/0, H 44/0, O 7/0, F 3/0

Mass Tolerance : 5mmu

Unsaturation (U.S.) : -0.5 - 80.0

| Observed m/z | Int% | Err [ppm / mmu] | U.S. | Composition       |
|--------------|------|-----------------|------|-------------------|
| 629.2719     | 23.7 | -1.1 / -0.7     | 14.5 | C 35 H 40 O 7 F 3 |

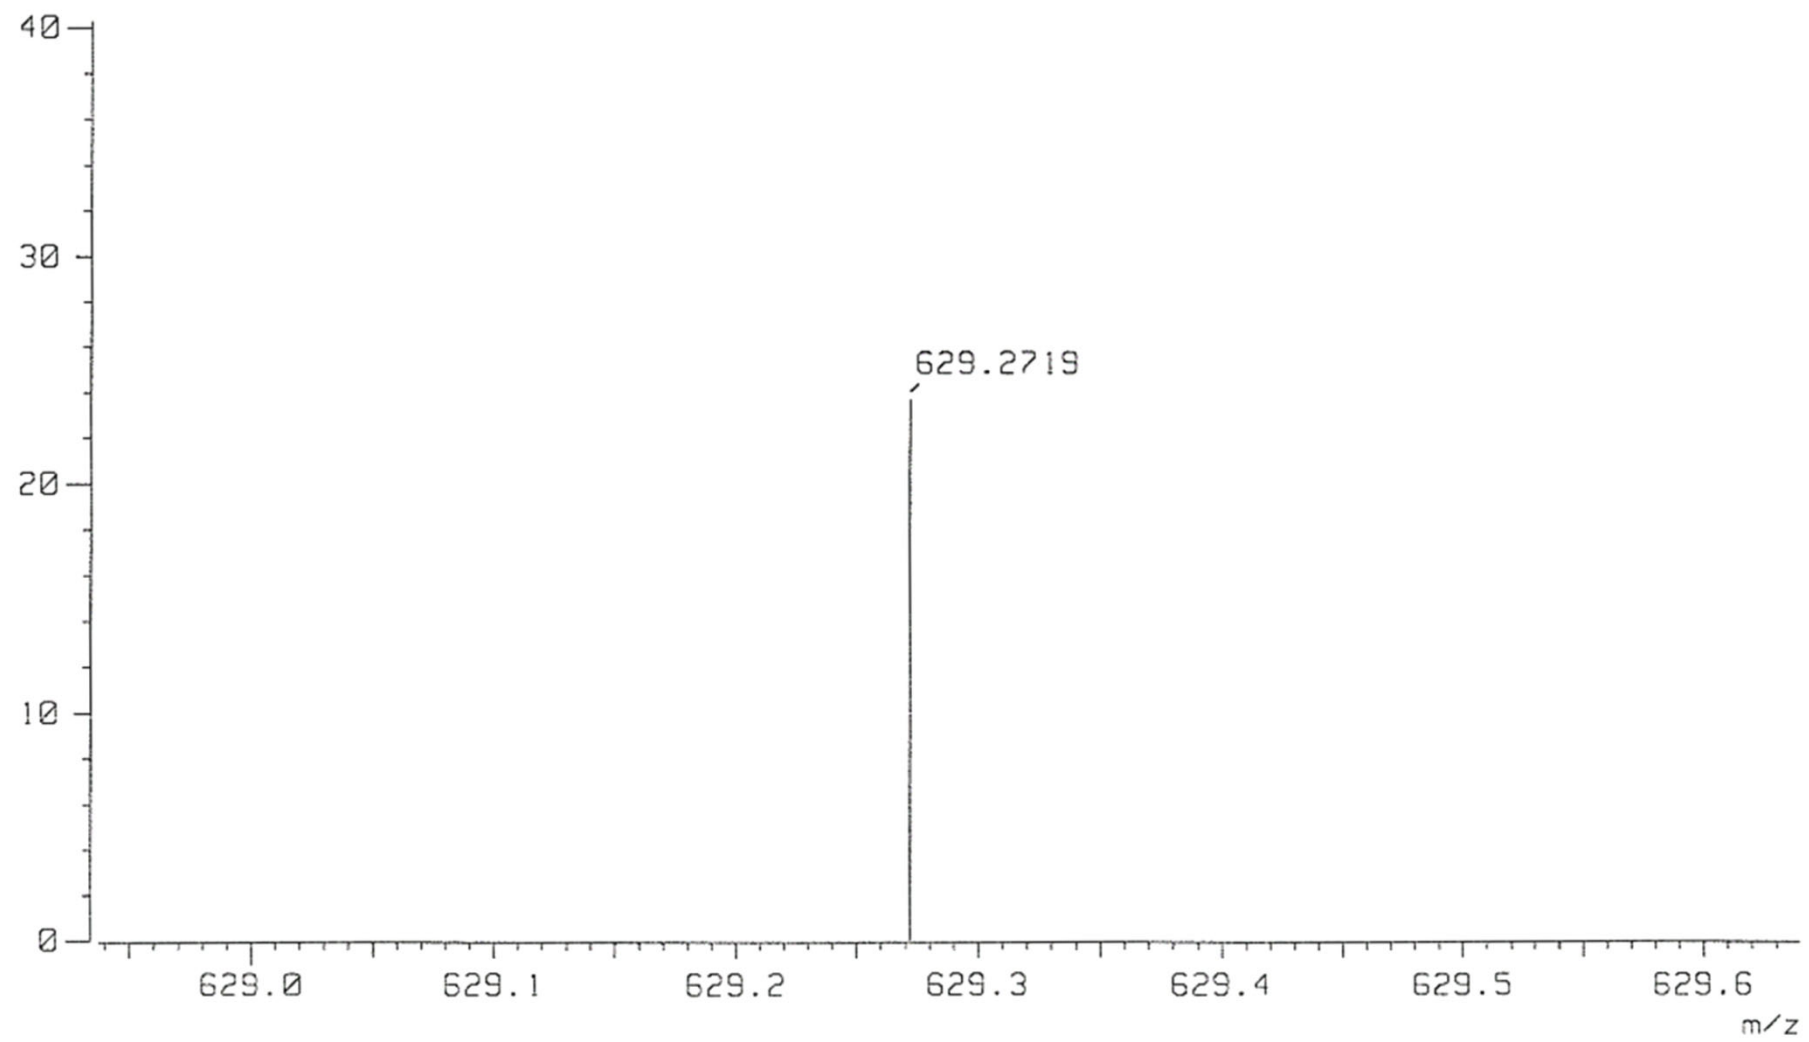

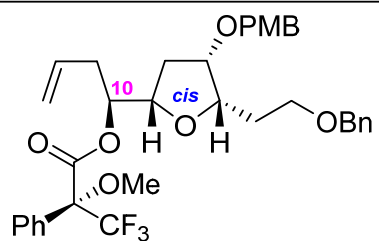

**SI-A-(R)-MTPA-06**

Chemical Formula: C<sub>35</sub>H<sub>39</sub>F<sub>3</sub>O<sub>7</sub>

Exact Mass: 628.2648

**[M+H]<sup>+</sup> Calcd for C<sub>35</sub>H<sub>40</sub>F<sub>3</sub>O<sub>7</sub> 629.2726**

[ Elemental Composition ]

Data : FAB-SK-10-005

Date : 11-Oct-2023 12:49

Sample:

Note : SM Lab Research Center (Jeol JMS-700)

Inlet : Reserv.

Ion Mode : FAB+

RT : 5.40 min

Scan#: 163+85

Elements : C 37/0, H 44/0, O 7/0, F 3/0

Mass Tolerance : 5mmu

Unsaturation (U.S.) : -0.5 - 80.0

| Observed m/z | Int% | Err [ppm / mmu] | U.S. Composition       |
|--------------|------|-----------------|------------------------|
| 629.2722     | 60.8 | -0.6 / -0.4     | 14.5 C 35 H 40 O 7 F 3 |

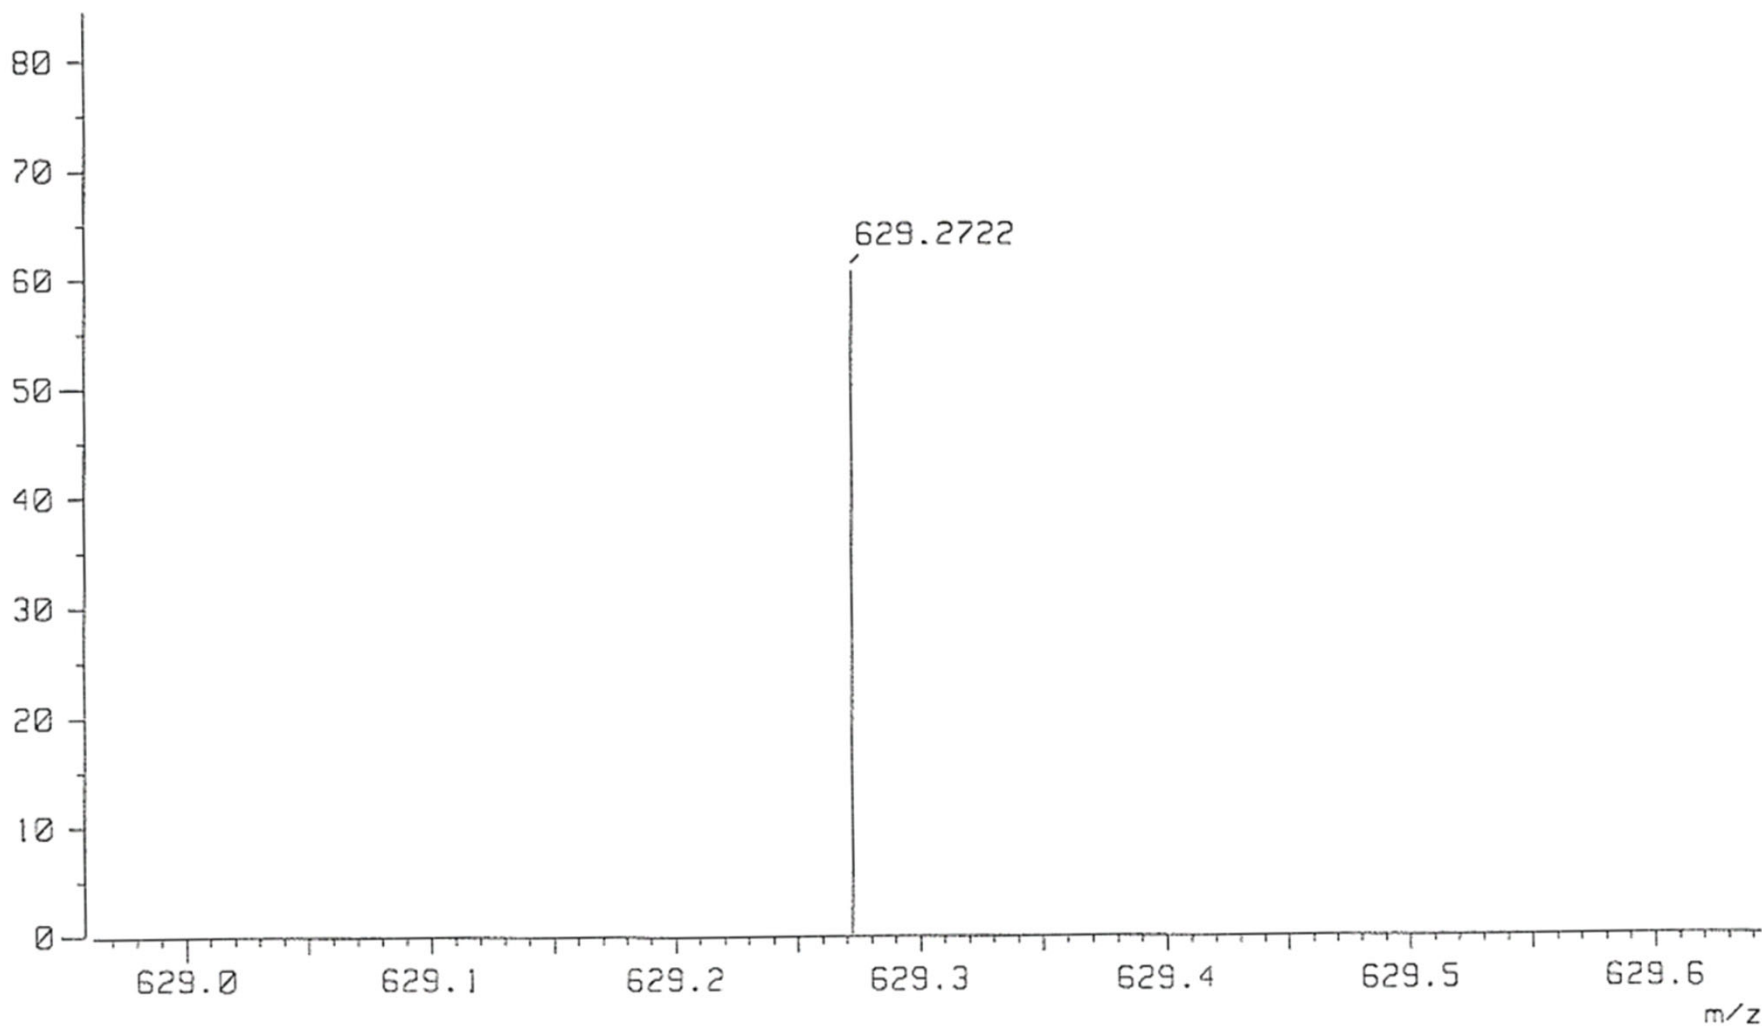



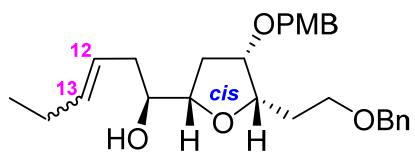

**20**

Chemical Formula: C<sub>27</sub>H<sub>36</sub>O<sub>5</sub>

Exact Mass: 440.2563

**[M]<sup>+</sup> Calcd for C<sub>27</sub>H<sub>36</sub>O<sub>5</sub> 440.2563**

[ Elemental Composition ]

Data : SK-25-017

Sample: Ajou-Univ.

Note : SM Lab Research institute for Analysis

Inlet : Reserv.

RT : 0.97 min

Elements : C 30/0, H 45/0, O 6/0

Mass Tolerance : 10mmu

Unsaturation (U.S.) : -1.0 - 50.0

Date : 20-Dec-2019 16:52

Ion Mode : EI+

Scan#: 30+30+31+30

| Observed m/z | Int% | Err [ppm / mmu] | U.S. | Composition   |
|--------------|------|-----------------|------|---------------|
| 440.2558     | 19.2 | -1.1 / -0.5     | 10.0 | C 27 H 36 O 5 |

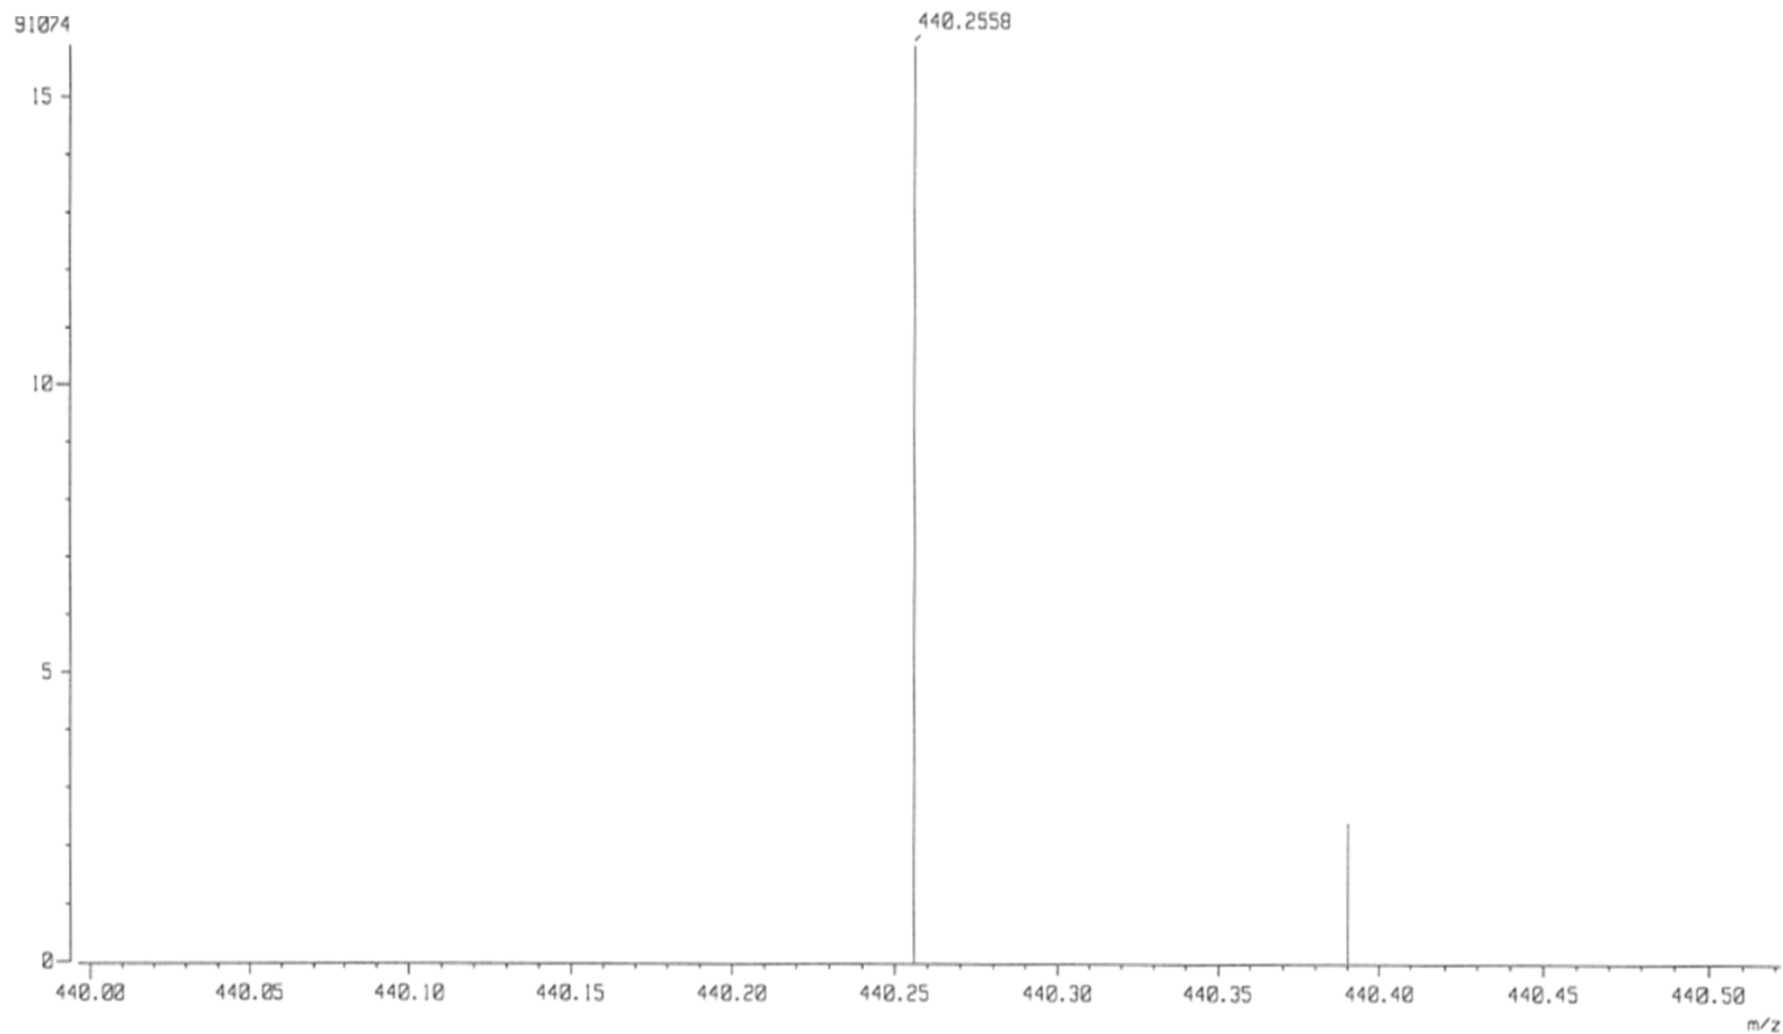

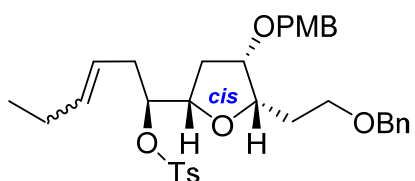

**SI-A-07**

Chemical Formula: C<sub>34</sub>H<sub>42</sub>O<sub>7</sub>S

Exact Mass: 594.2651

**[M]<sup>+</sup> Calcd for C<sub>34</sub>H<sub>42</sub>O<sub>7</sub>S 594.2651**

[ Elemental Composition ]

Data : SK-26-019

Sample: Ajou-Univ.

Note : SM Lab Research institute for Analysis

Inlet : Reserv.

RT : 1.94 min

Elements : C 35/0, H 45/0, O 7/0, S 1/0

Mass Tolerance : 10mmu

Unsaturation (U.S.) : -1.0 - 50.0

Date : 20-Dec-2019 17:14

Ion Mode : EI+

Scan#: 59+58+58+57+59+59+58

| Observed m/z | Int% | Err [ppm / mmu] | U.S. | Composition     |
|--------------|------|-----------------|------|-----------------|
| 594.2654     | 26.2 | +0.4 / +0.3     | 15.0 | C 34 H 42 O 7 S |

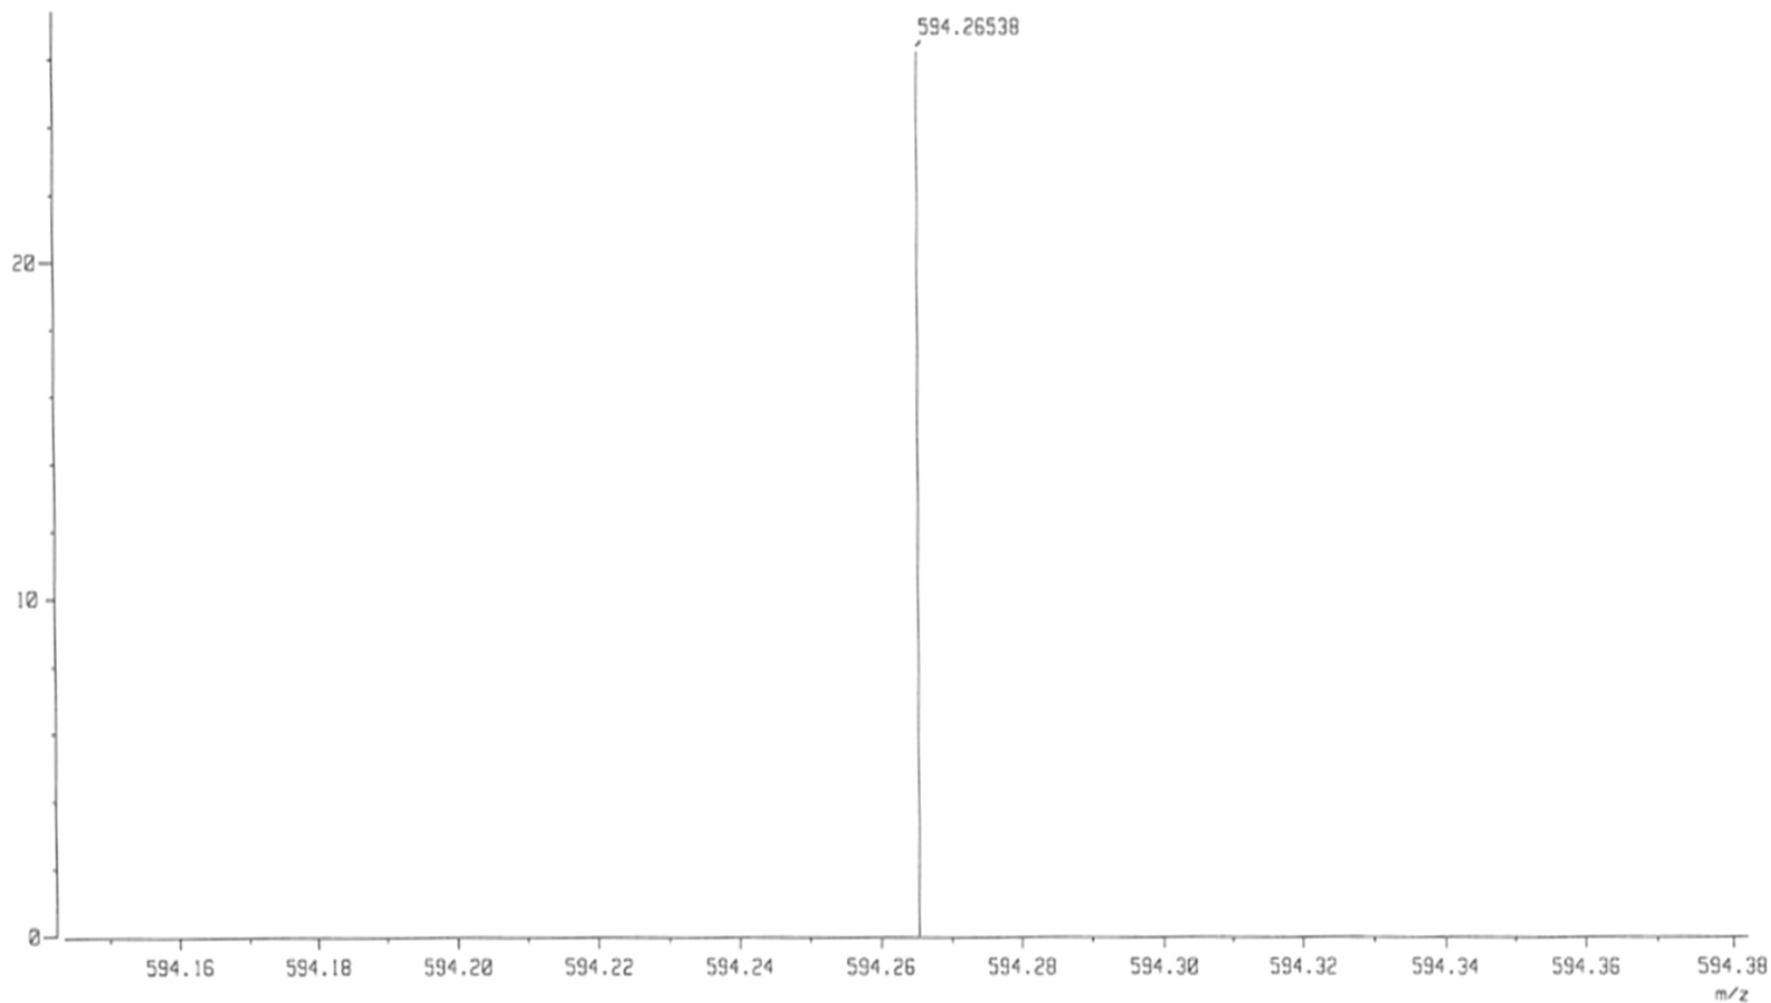

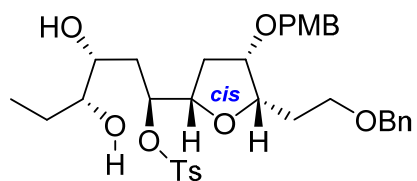

8

Chemical Formula: C<sub>34</sub>H<sub>44</sub>O<sub>9</sub>S

Exact Mass: 628.2706

**[M+H]<sup>+</sup> Calcd for C<sub>34</sub>H<sub>45</sub>O<sub>9</sub>S 629.2784**

[ Elemental Composition ]

Data : FAB-SK-12-007

Date : 11-Oct-2023 12:55

Sample:

Note : SM Lab Research Center (Jeol JMS-700)

Inlet : Reserv.

Ion Mode : FAB+

RT : 1.27 min

Scan#: 39

Elements : C 36/0, H 46/0, O 9/0, S 1/0

Mass Tolerance : 5mmu

Unsaturation (U.S.) : -0.5 - 80.0

| Observed m/z | Int% | Err [ppm / mmu] | U.S. | Composition     |
|--------------|------|-----------------|------|-----------------|
| 629.2787     | 81.9 | +0.5 / +0.3     | 13.5 | C 34 H 45 O 9 S |

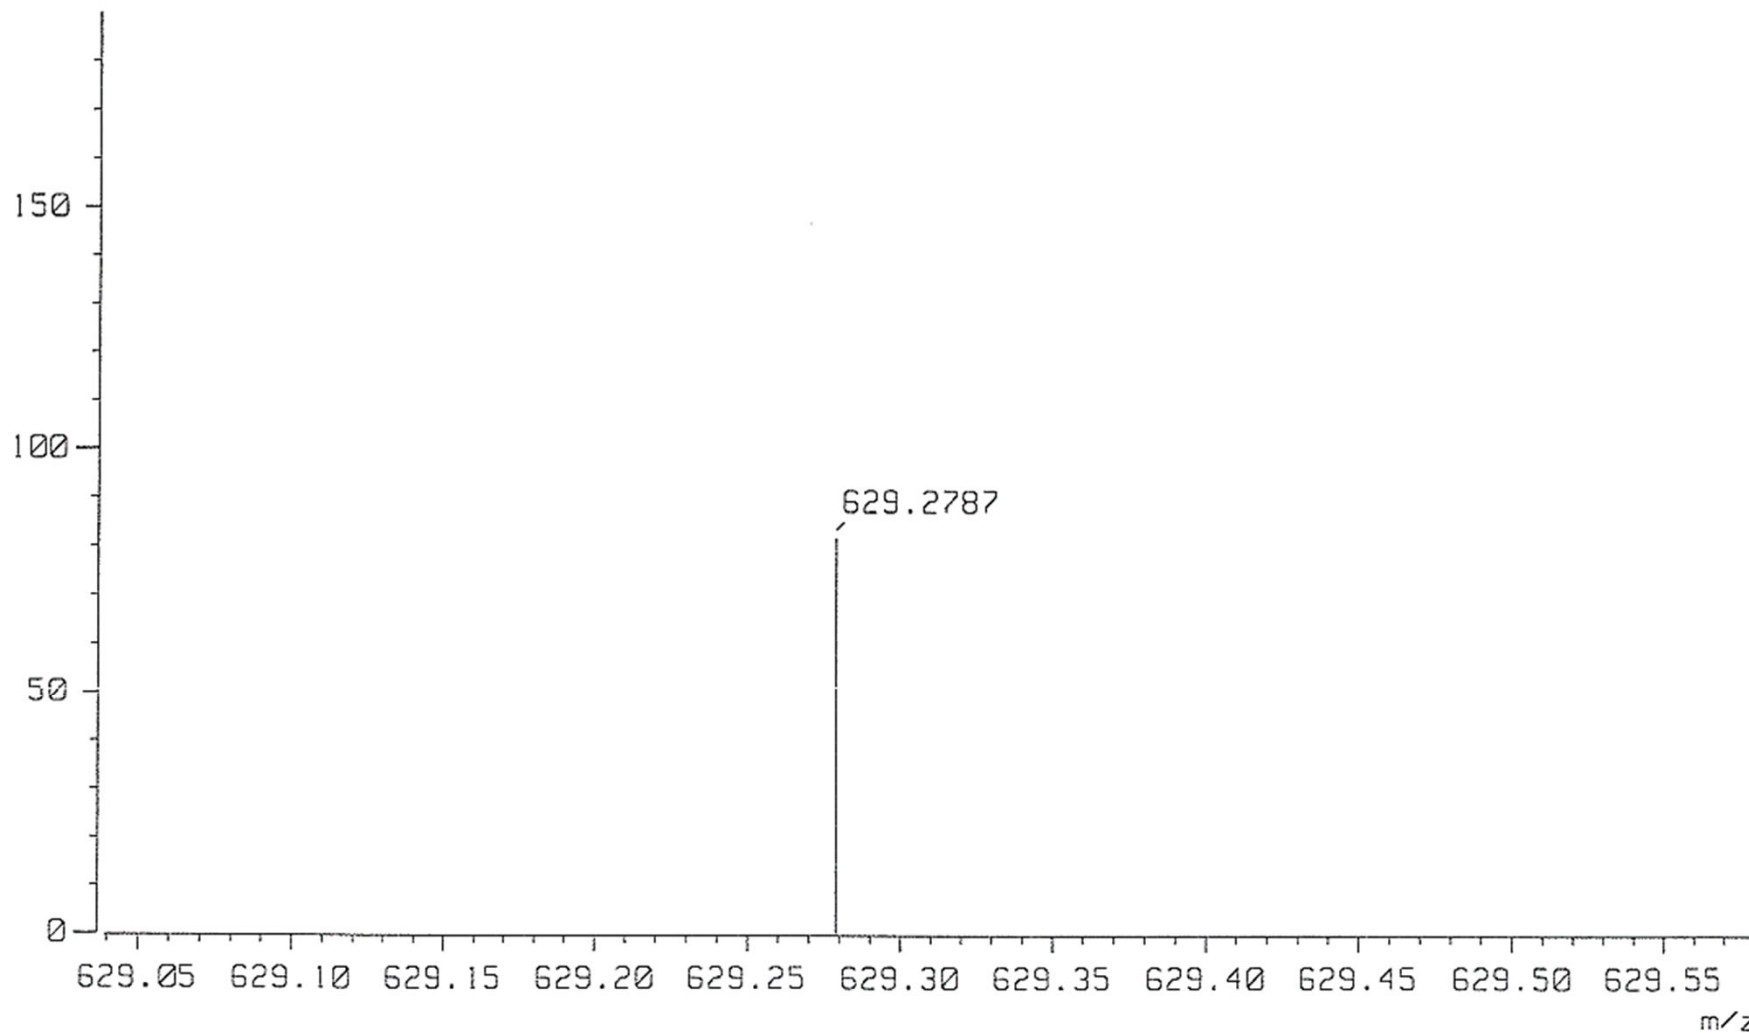

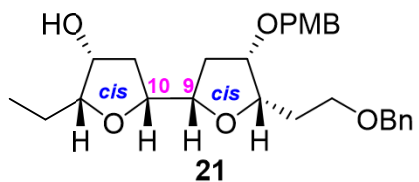

Chemical Formula: C<sub>27</sub>H<sub>36</sub>O<sub>6</sub>

Exact Mass: 456.2512

**[M]<sup>+</sup> Calcd for C<sub>27</sub>H<sub>36</sub>O<sub>6</sub> 456.2512**

[ Elemental Composition ]

Data : SK-1-001

Date : 20-Dec-2019 14:03

Sample: Ajou-Univ.

Note : SM Lab Research institute for Analysis

Inlet : Reserv.

Ion Mode : EI+

RT : 1.10 min

Scan#: 34+38+39

Elements : C 27/0, H 50/0, O 7/0

Mass Tolerance : 10mmu

Unsaturation (U.S.) : -1.0 - 50.0

| Observed m/z | Int%  | Err [ppm / mmu] | U.S. Composition   |
|--------------|-------|-----------------|--------------------|
| 456.2509     | 100.0 | -0.5 / -0.2     | 10.0 C 27 H 36 O 6 |

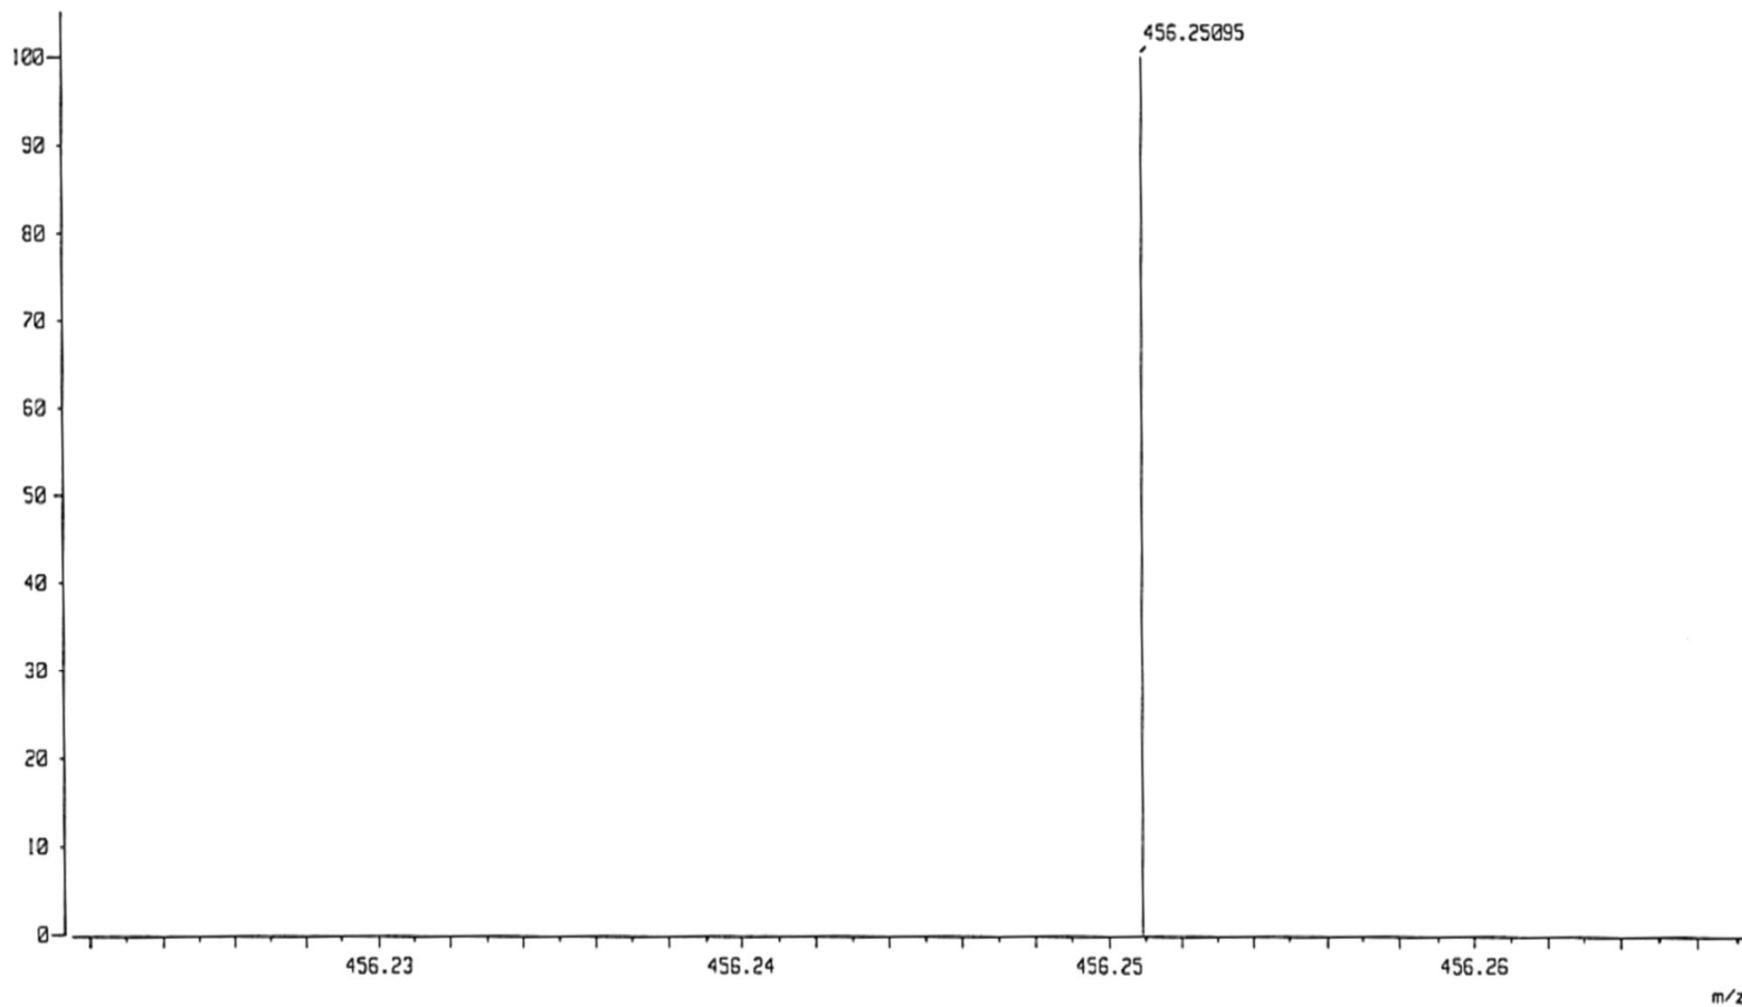

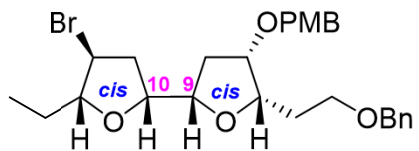

SI-A-09

Chemical Formula: C<sub>27</sub>H<sub>35</sub>BrO<sub>5</sub>

Exact Mass: 518.1668

[M]<sup>+</sup> Calcd for C<sub>27</sub>H<sub>35</sub>BrO<sub>5</sub> 518.1668

[ Elemental Composition ]

Data : SK-2-002

Date : 20-Dec-2019 14:06

Sample: Ajou-Univ.

Note : SM Lab Research institute for Analysis

Inlet : Reserv.

Ion Mode : EI+

RT : 0.74 min

Scan#: 23

Elements : C 28/0, H 50/0, Br 1/0, O 7/0

Mass Tolerance : 10mmu

Unsaturation (U.S.) : -1.0 - 50.0

| Observed m/z | Int% | Err [ppm / mmu] | U.S. | Composition      |
|--------------|------|-----------------|------|------------------|
| 518.1669     | 27.9 | +0.3 / +0.1     | 10.0 | C 27 H 35 Br O 5 |

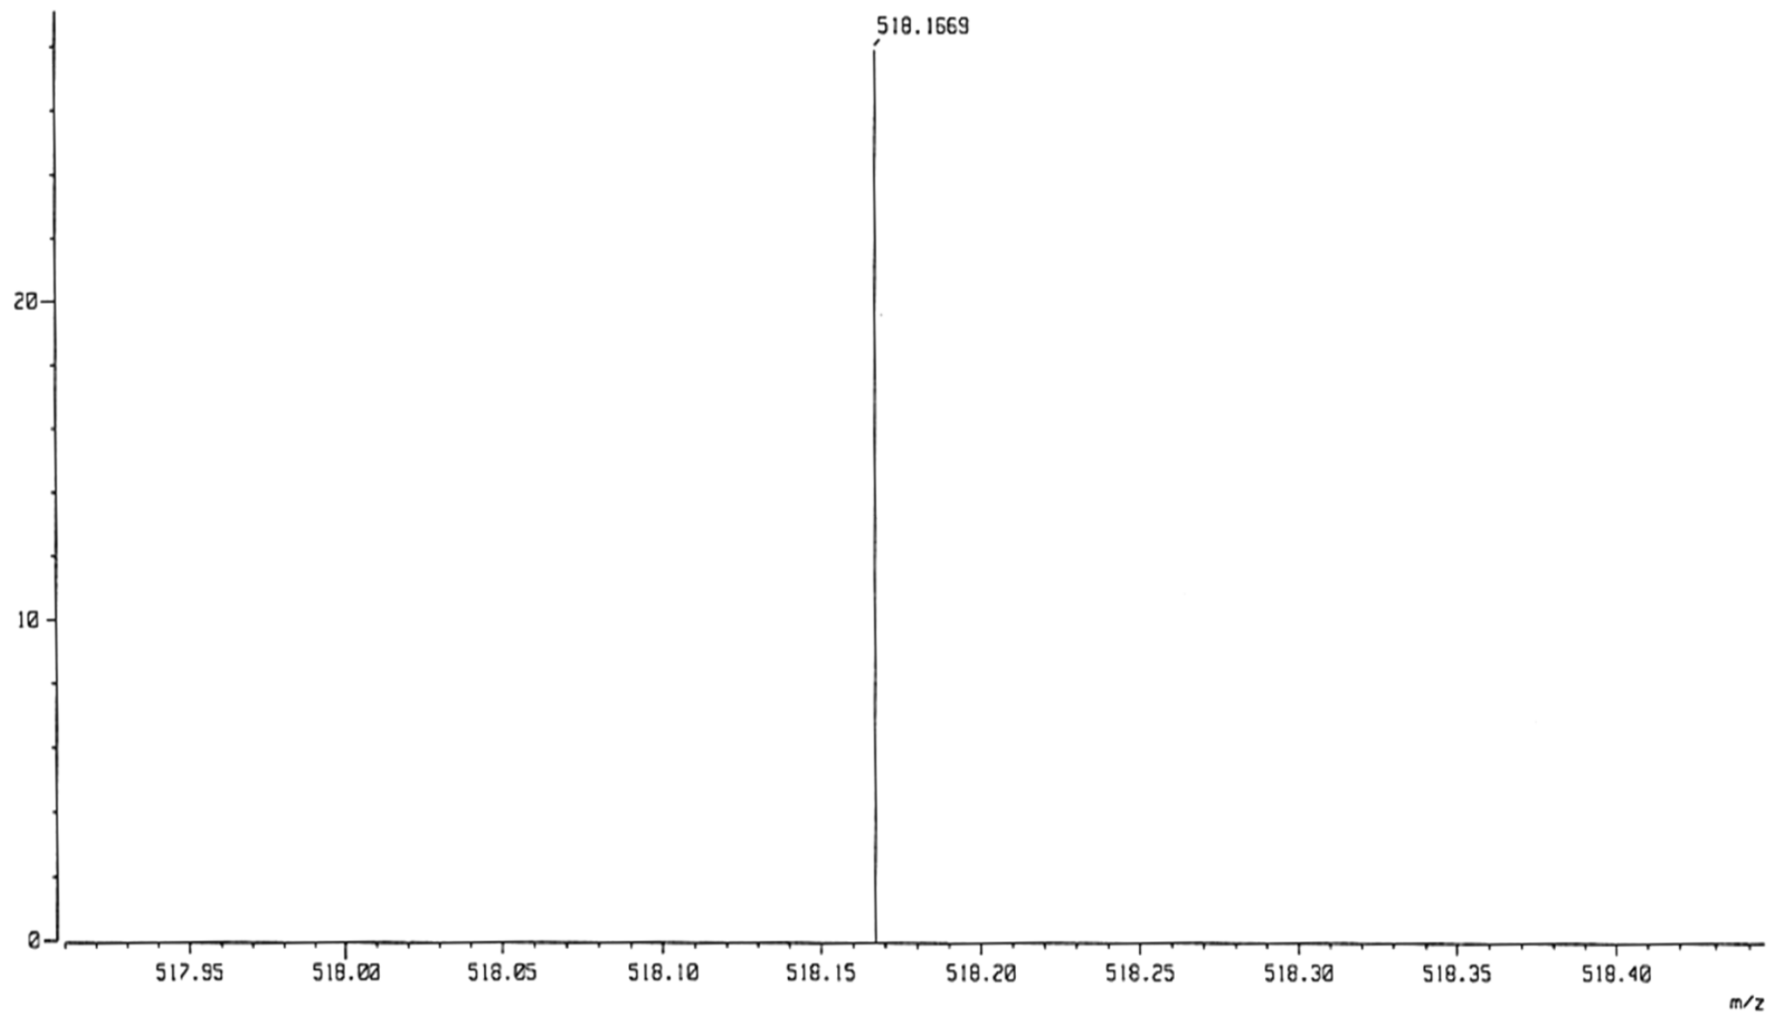

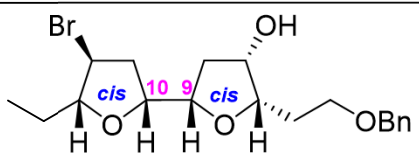

SI-A-10

Chemical Formula: C<sub>19</sub>H<sub>27</sub>BrO<sub>4</sub>

Exact Mass: 398.1093

[M]<sup>+</sup> Calcd for C<sub>19</sub>H<sub>27</sub>BrO<sub>4</sub> 398.1093

[ Elemental Composition ]

Data : SK-3-003

Date : 20-Dec-2019 14:10

Sample: Ajou-Univ.

Note : SM Lab Research institute for Analysis

Inlet : Reserv.

Ion Mode : EI+

RT : 0.74 min

Scan#: 23

Elements : C 20/0, H 30/0, Br 1/0, O 7/0

Mass Tolerance : 10mmu

Unsaturation (U.S.) : -1.0 - 50.0

| Observed m/z | Int% | Err [ppm / mmu] | U.S. Composition     |
|--------------|------|-----------------|----------------------|
| 398.1094     | 16.0 | +0.3 / +0.1     | 6.0 C 19 H 27 Br O 4 |

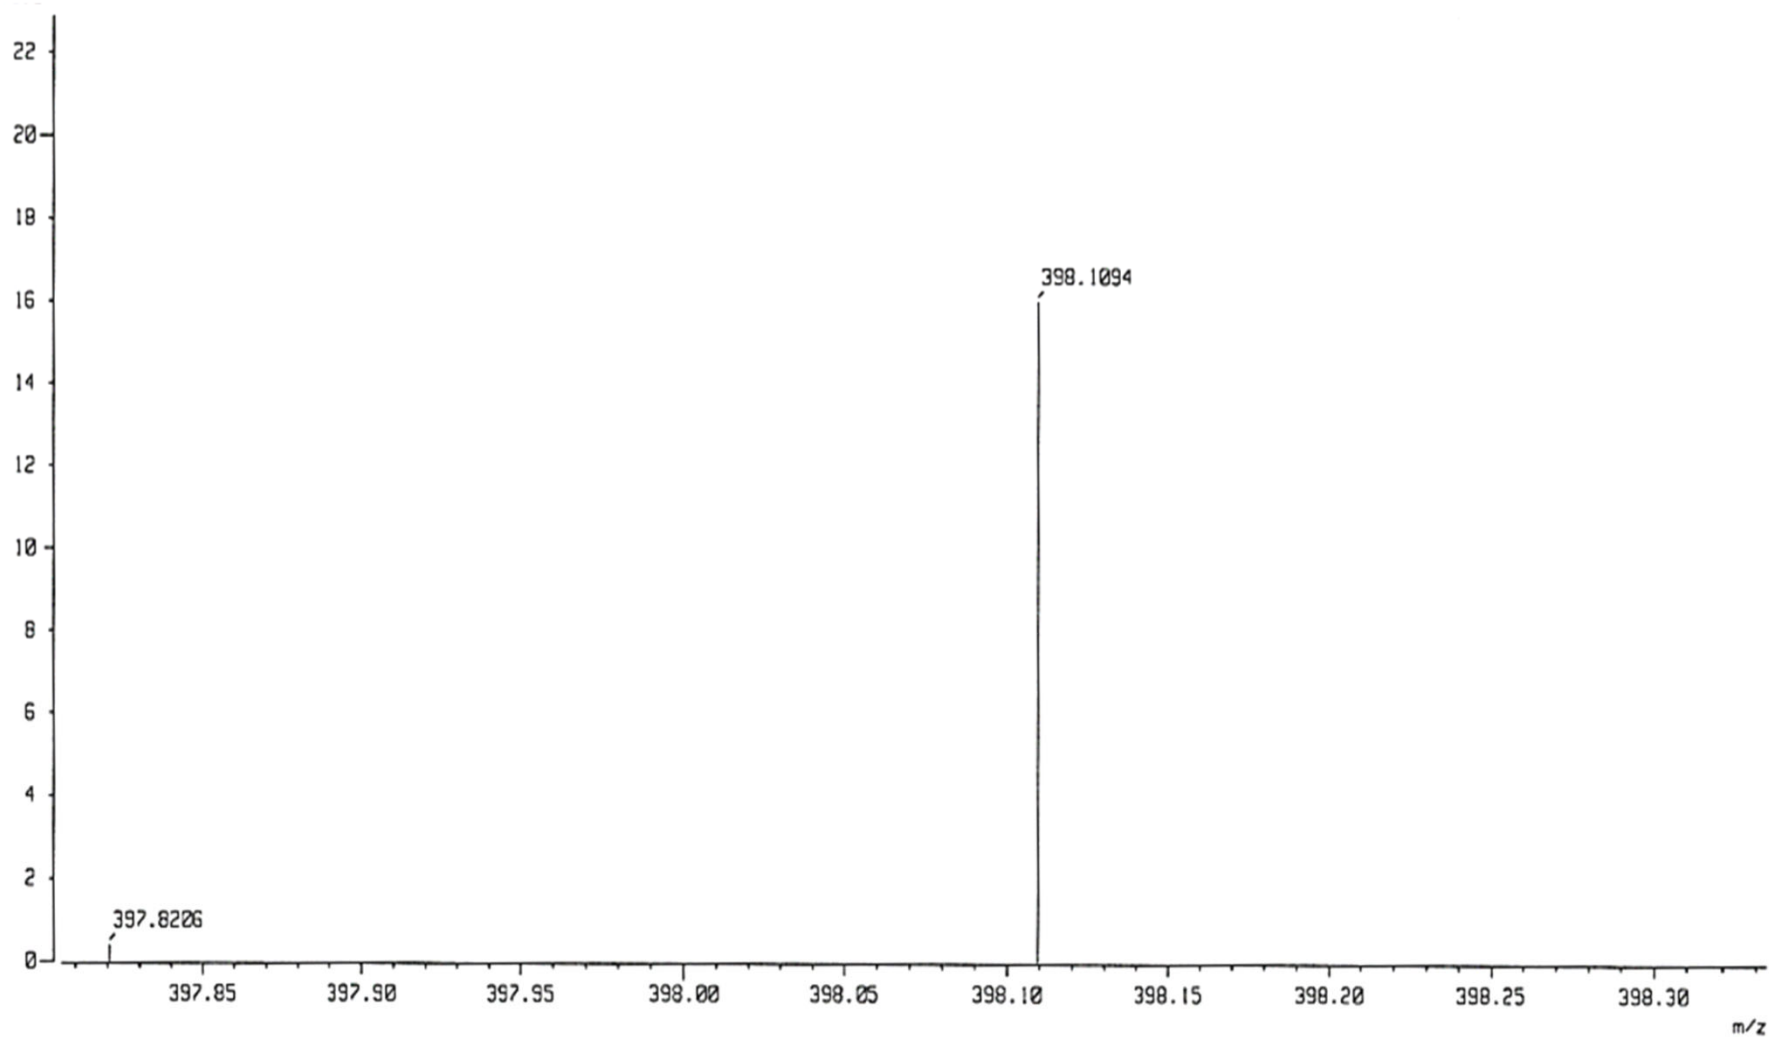

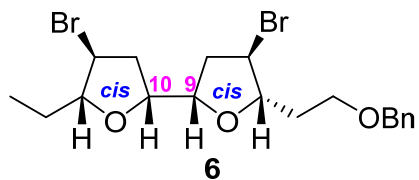

Chemical Formula:  $C_{19}H_{26}Br_2O_3$

Exact Mass: 460.0249

$[M]^+$  Calcd for  $C_{19}H_{26}Br_2O_3$  460.0249

[ Elemental Composition ]

Data : SK-4-004

Date : 20-Dec-2019 14:13

Sample: Ajou-Univ.

Note : SM Lab Research institute for Analysis

Inlet : Reserv.

Ion Mode : EI+

RT : 0.90 min

Scan#: 28+32

Elements : C 20/0, H 30/0, Br 2/0, O 7/0

Mass Tolerance : 10mmu

Unsaturation (U.S.) : -1.0 - 50.0

| Observed m/z | Int% | Err [ppm / mmu] | U.S. | Composition        |
|--------------|------|-----------------|------|--------------------|
| 460.0243     | 53.5 | -1.2 / -0.5     | 6.0  | C 19 H 26 Br 2 O 3 |

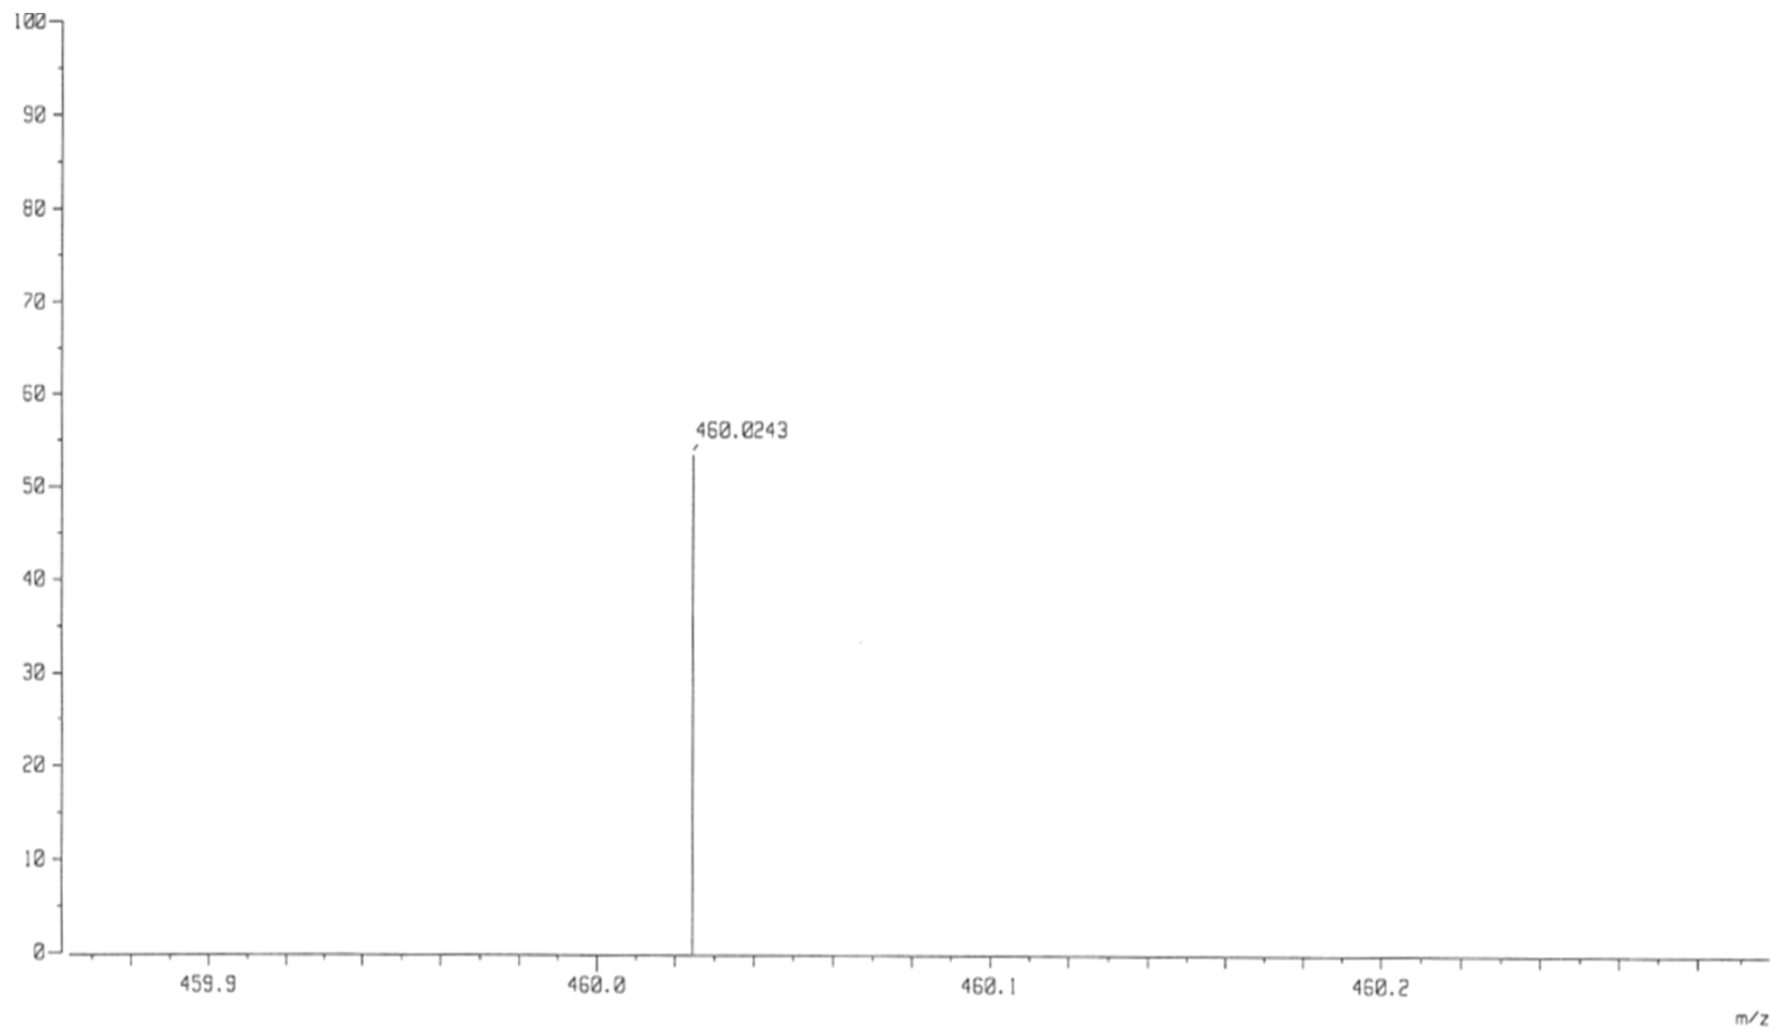

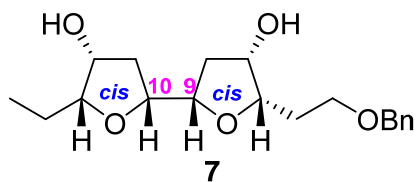

Chemical Formula: C<sub>19</sub>H<sub>28</sub>O<sub>5</sub>

Exact Mass: 336.1937

**[M+H]<sup>+</sup> Calcd for C<sub>19</sub>H<sub>29</sub>O<sub>5</sub> 337.2015**

[ Elemental Composition ]

Data : FAB-SK-13-013

Sample:

Note : SM Lab Research Center (Jeol JMS-700)

Inlet : Reserv.

RT : 3.34 min

Elements : C 27/0, H 37/0, O 7/0

Mass Tolerance : 5mmu

Unsaturation (U.S.) : -0.5 - 80.0

Date : 11-Oct-2023 15:05

Ion Mode : FAB+

Scan#: 101

| Observed m/z | Int% | Err [ppm / mmu] | U.S. Composition  |
|--------------|------|-----------------|-------------------|
| 337.2017     | 91.3 | +0.7 / +0.2     | 5.5 C 19 H 29 O 5 |

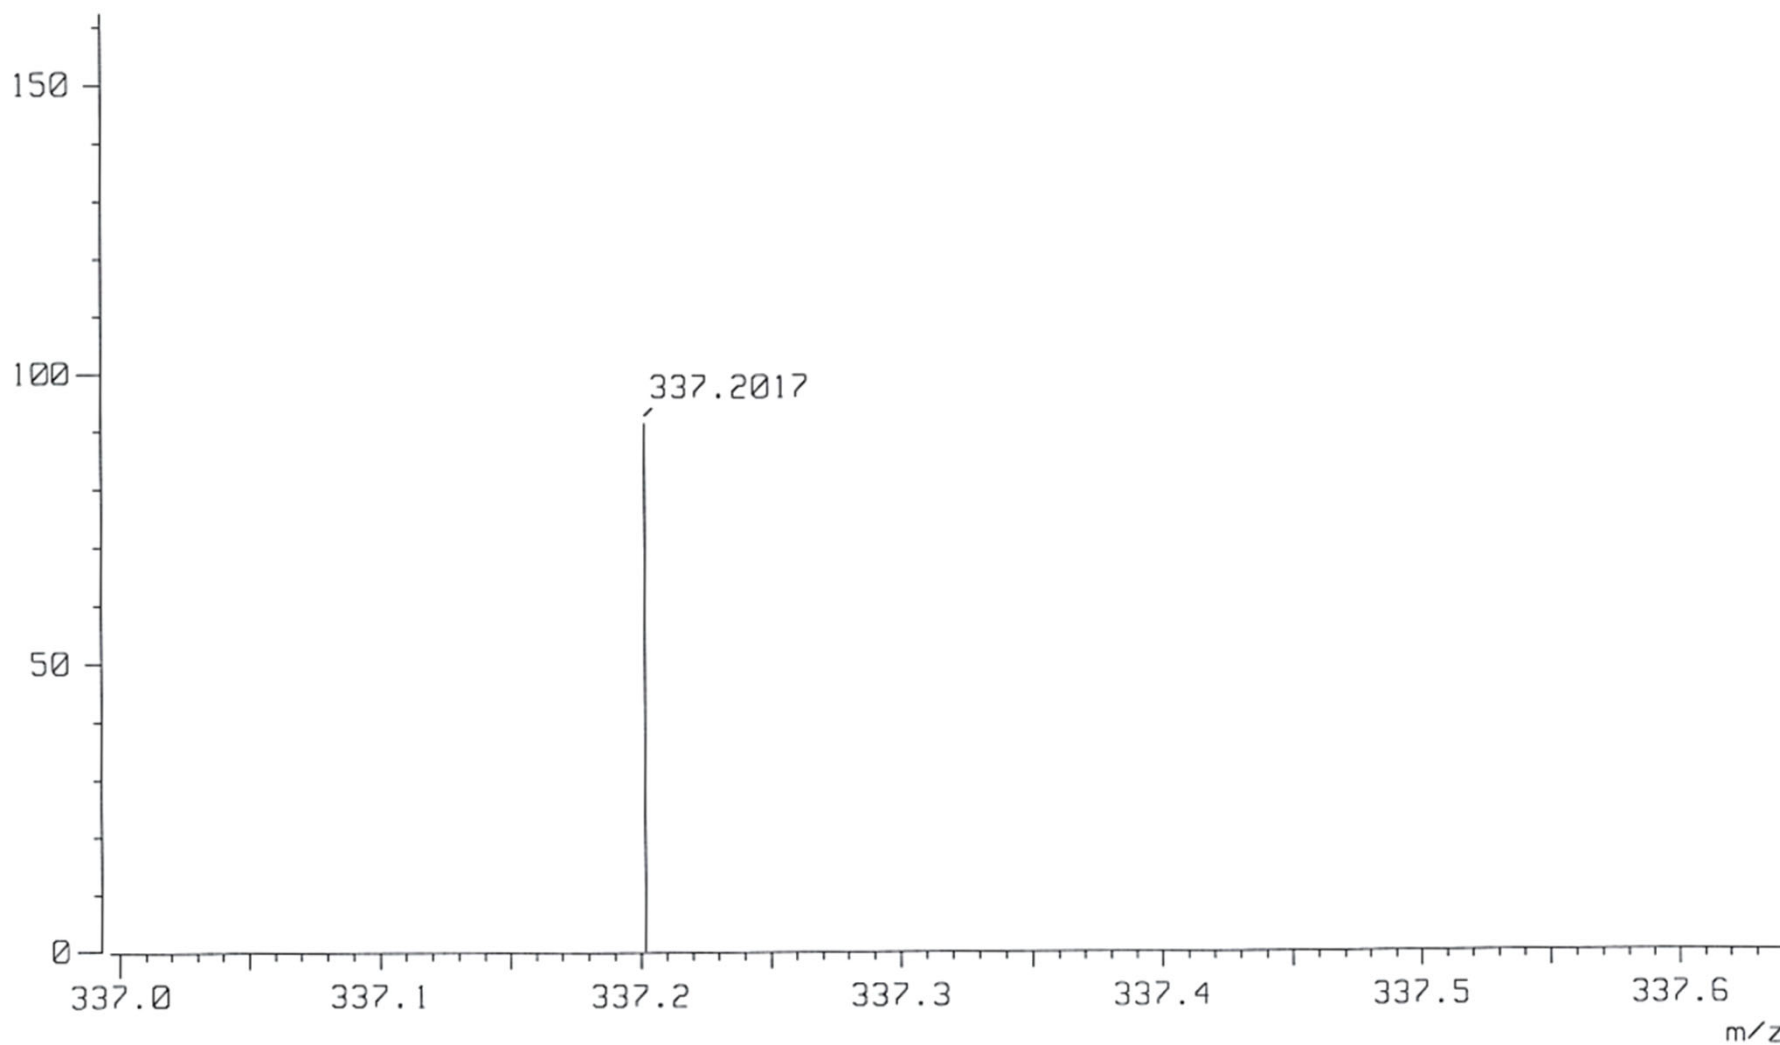



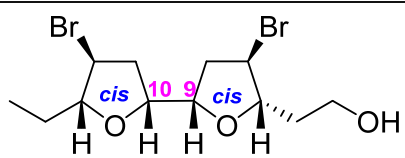

**SI-A-13**

Chemical Formula:  $C_{12}H_{20}Br_2O_3$

Exact Mass: 369.9779

$[M+H]^+$  Calcd for  $C_{12}H_{21}Br_2O_3$  370.9857

[ Elemental Composition ]

Data : FAB-SK-14-015

Date : 11-Oct-2023 15:15

Sample:

Note : SM Lab Research Center (Jeol JMS-700)

Inlet : Reserv.

Ion Mode : FAB+

RT : 1.47 min

Scan#: (44,46)

Elements : C 15/0, H 22/0, O 3/0, Br 2/0

Mass Tolerance : 5mmu

Unsaturation (U.S.) : -0.5 - 80.0

| Observed m/z | Int% | Err [ppm / mmu] | U.S. Composition       |
|--------------|------|-----------------|------------------------|
| 370.9854     | 54.4 | -1.0 / -0.4     | 1.5 C 12 H 21 O 3 Br 2 |

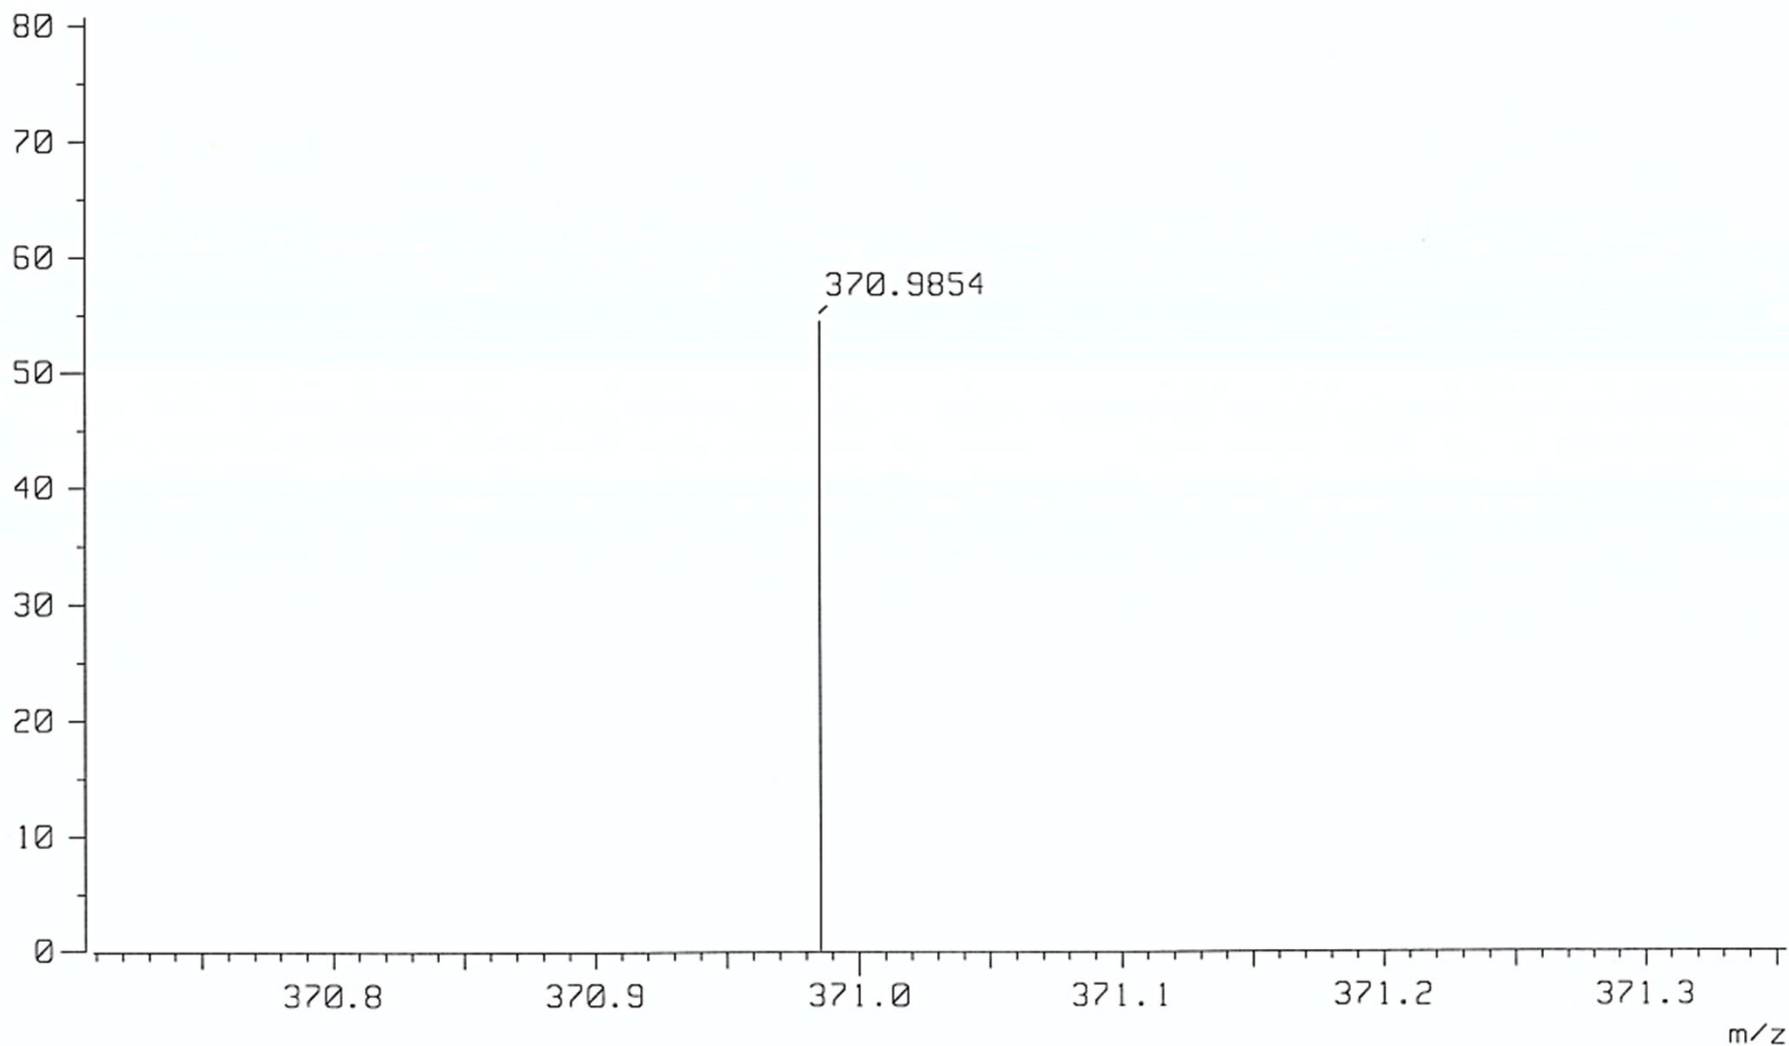

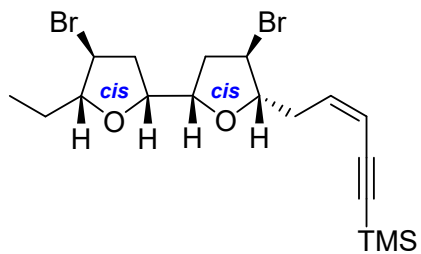

**TMS-(3Z)-Enyne SI-A-14**

Chemical Formula:  $C_{18}H_{28}Br_2O_2Si$

Exact Mass: 462.0225

$[M]^+$  Calcd for  $C_{18}H_{28}Br_2O_2Si$  462.0225

[ Elemental Composition ]

Data : SK-6-006

Date : 20-Dec-2019 14:34

Sample: Ajou-Univ.

Note : SM Lab Research institute for Analysis

Inlet : Reserv.

Ion Mode : EI+

RT : 0.80 min

Scan#: 25

Elements : C 20/0, H 30/0, Br 2/0, O 2/0, Si 2/0

Mass Tolerance : 10mmu

Unsaturation (U.S.) : -1.0 - 50.0

| Observed m/z | Int% | Err [ppm / mmu] | U.S. | Composition           |
|--------------|------|-----------------|------|-----------------------|
| 462.0219     | 32.5 | -1.3 / -0.6     | 5.0  | C 18 H 28 Br 2 O 2 Si |

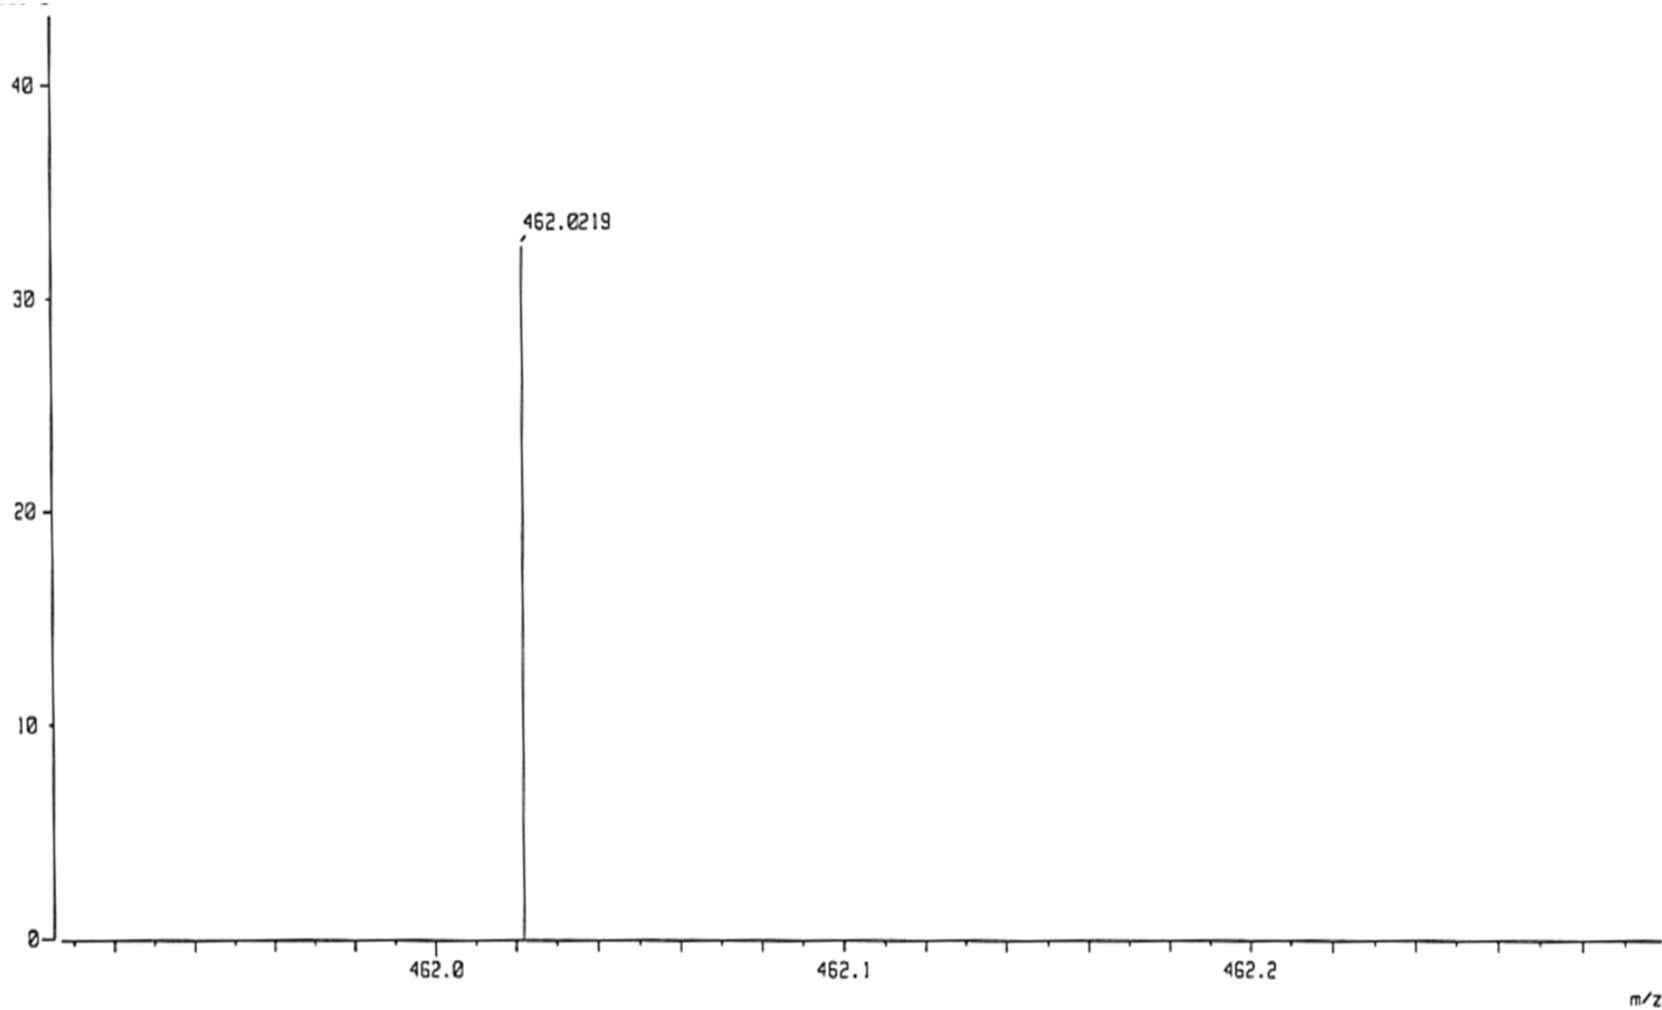

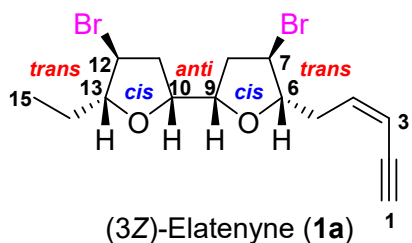

Chemical Formula: C<sub>15</sub>H<sub>20</sub>Br<sub>2</sub>O<sub>2</sub>

Exact Mass: 389.9830

**[M]<sup>+</sup> Calcd for C<sub>15</sub>H<sub>20</sub>Br<sub>2</sub>O<sub>2</sub> 389.9830**

[ Elemental Composition ]

Data : 16-SK-16-031

Date : 10-Oct-2023 17:10

Sample:

Note : SMLab Mass analysis (Jeol HRMS JMS-700D)

Inlet : Direct

Ion Mode : EI+

RT : 0.94 min

Scan#: 29

Elements : C 16/0, H 22/0, O 2/0, Br 2/0

Mass Tolerance : 3mmu

Unsaturation (U.S.) : -0.5 - 70.0

| Observed m/z | Int% | Err [ppm / mmu] | U.S. | Composition        |
|--------------|------|-----------------|------|--------------------|
| 389.9825     | 12.2 | -1.2 / -0.5     | 5.0  | C 15 H 20 O 2 Br 2 |

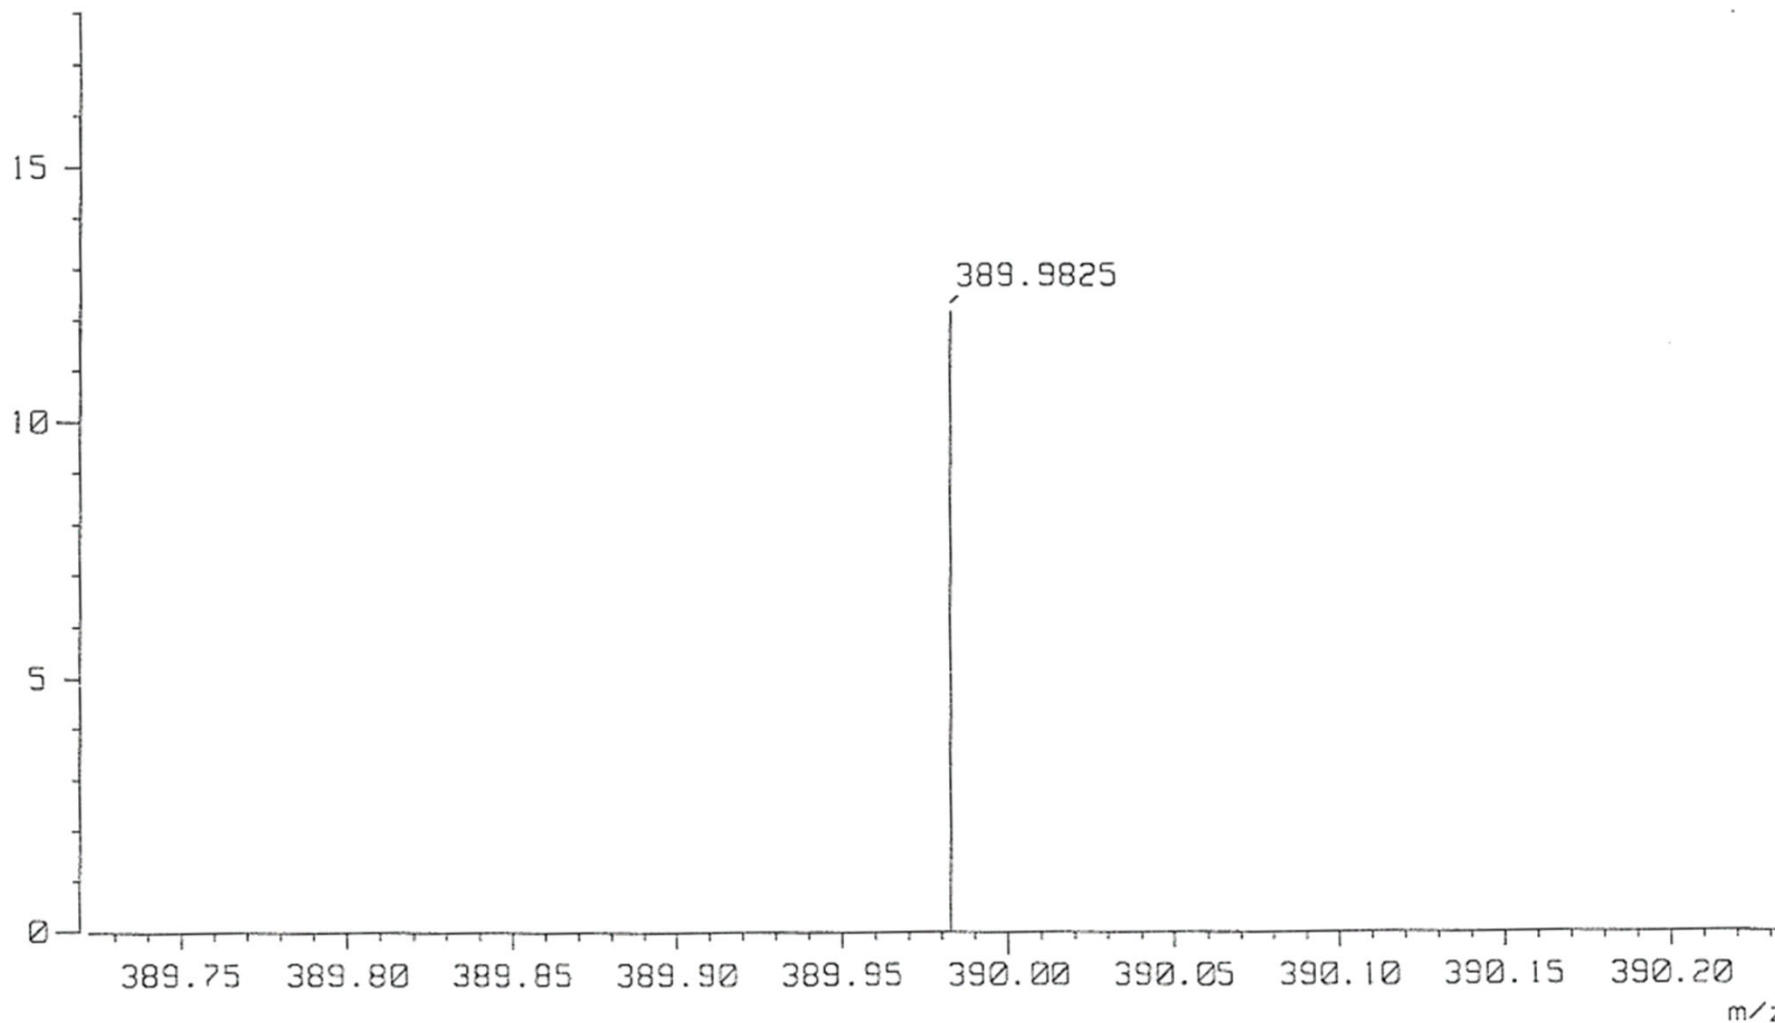

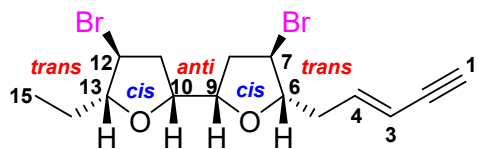

(3E)-Elatenyne (**1b**)

Chemical Formula: C<sub>15</sub>H<sub>20</sub>Br<sub>2</sub>O<sub>2</sub>

Exact Mass: 389.9830

**[M]<sup>+</sup> Calcd for C<sub>15</sub>H<sub>20</sub>Br<sub>2</sub>O<sub>2</sub> 389.9830**

[ Elemental Composition ]

Data : 15-SK-15-029

Date : 10-Oct-2023 17:06

Sample:

Note : SMLab Mass analysis (Jeol HRMS JMS-700D)

Inlet : Direct

Ion Mode : EI+

RT : 1.27 min

Scan#: 39

Elements : C 16/0, H 22/0, O 2/0, Br 2/0

Mass Tolerance : 3mmu

Unsaturation (U.S.) : -0.5 - 70.0

| Observed m/z | Int% | Err [ppm / mmu] | U.S. | Composition        |
|--------------|------|-----------------|------|--------------------|
| 389.9834     | 9.5  | +0.9 / +0.4     | 5.0  | C 15 H 20 O 2 Br 2 |

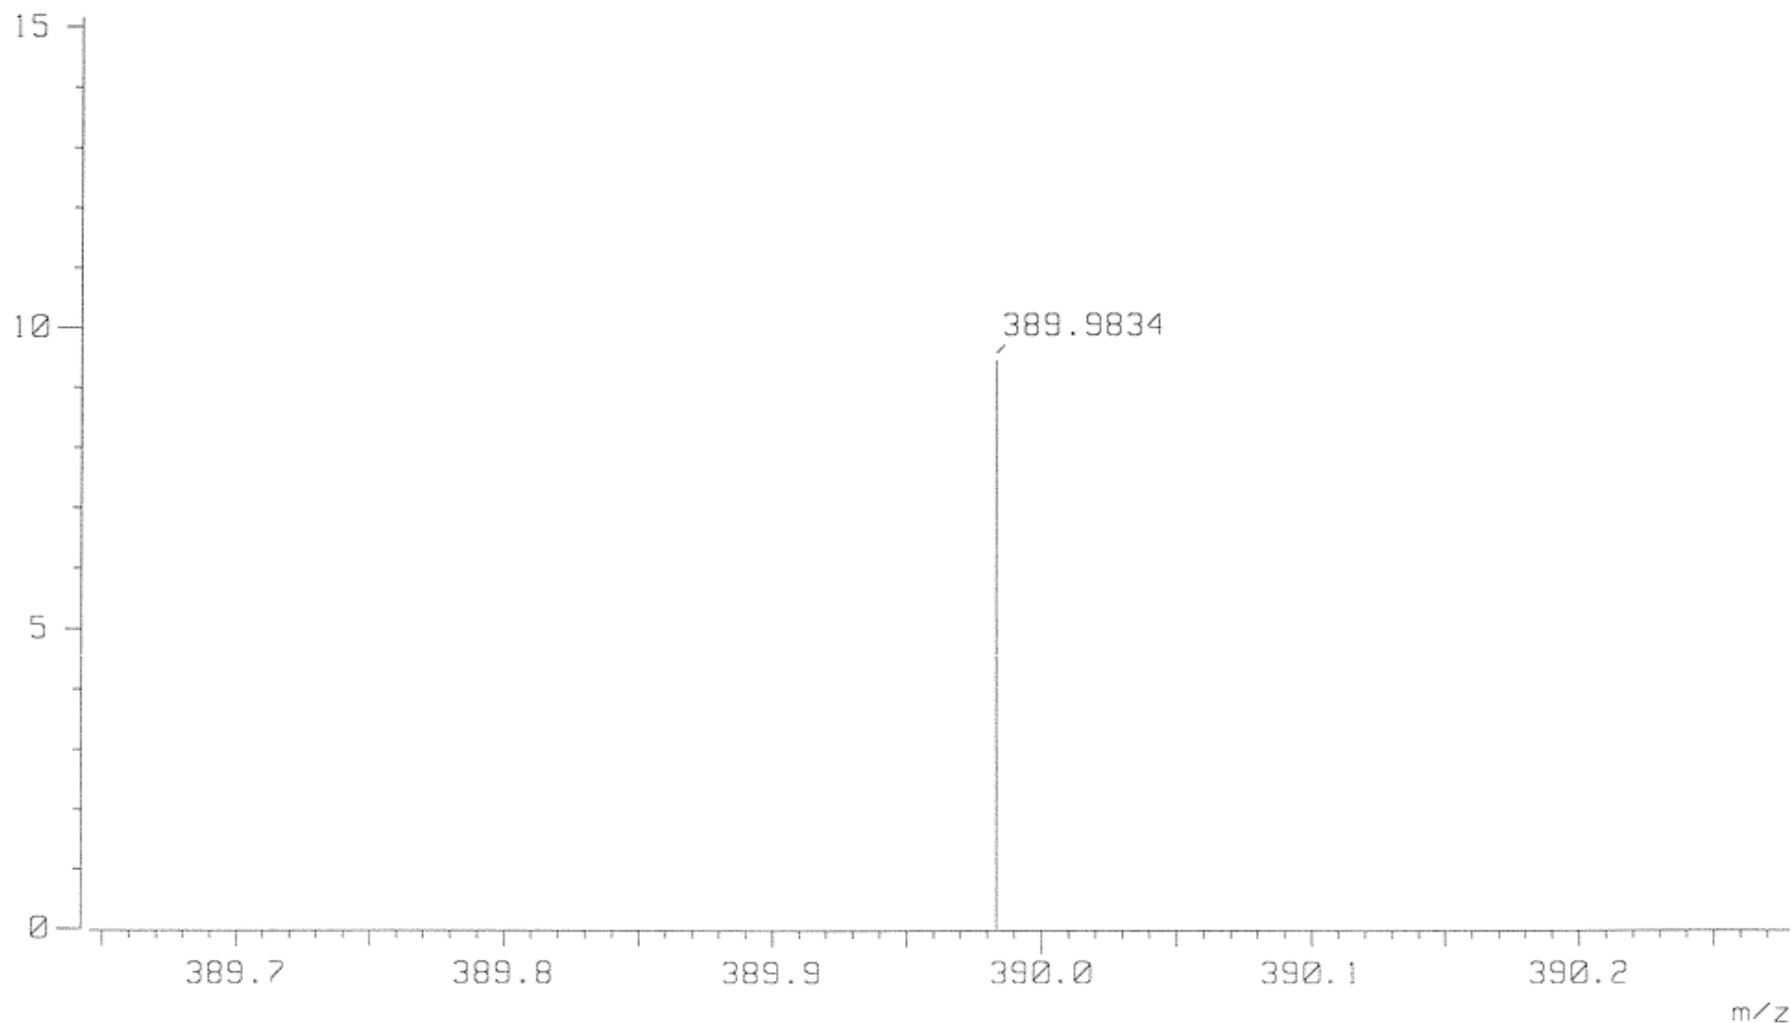

Supplement: d3ra07741a1.pdf [file d3ra07741a1.pdf]
